# Supplementary material
Source: PubMed Central journal article supplement (PMC5752381)
Supplement: jciinsight-2-92724-s001.pdf [file jciinsight-2-92724-s001.pdf]

## SUPPLEMENTAL FIGURES

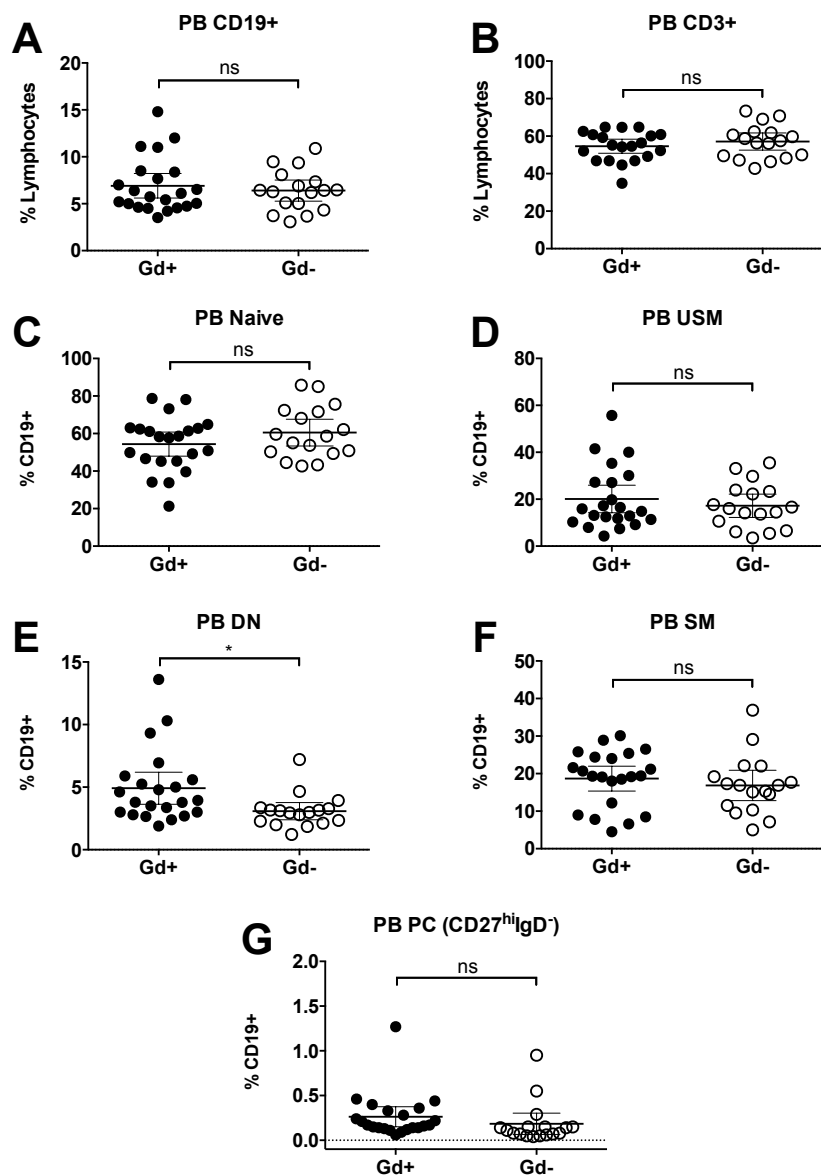

**Supplemental Figure S1.** CD3+ T cells, CD19+ B cells and B cell subsets in PB in patients with (Gd+) or without (Gd-) brain lesions on MRI. **A** and **B** are shown as a percentage of total lymphocytes; **C** to **G** represent percentages of the total CD19+ B cell population. Refer to **Supplemental Table S1** for numbers of patients represented in these graphs. Comparisons were made using unpaired or paired t-tests.; ns = not significant, \*P<0.05.

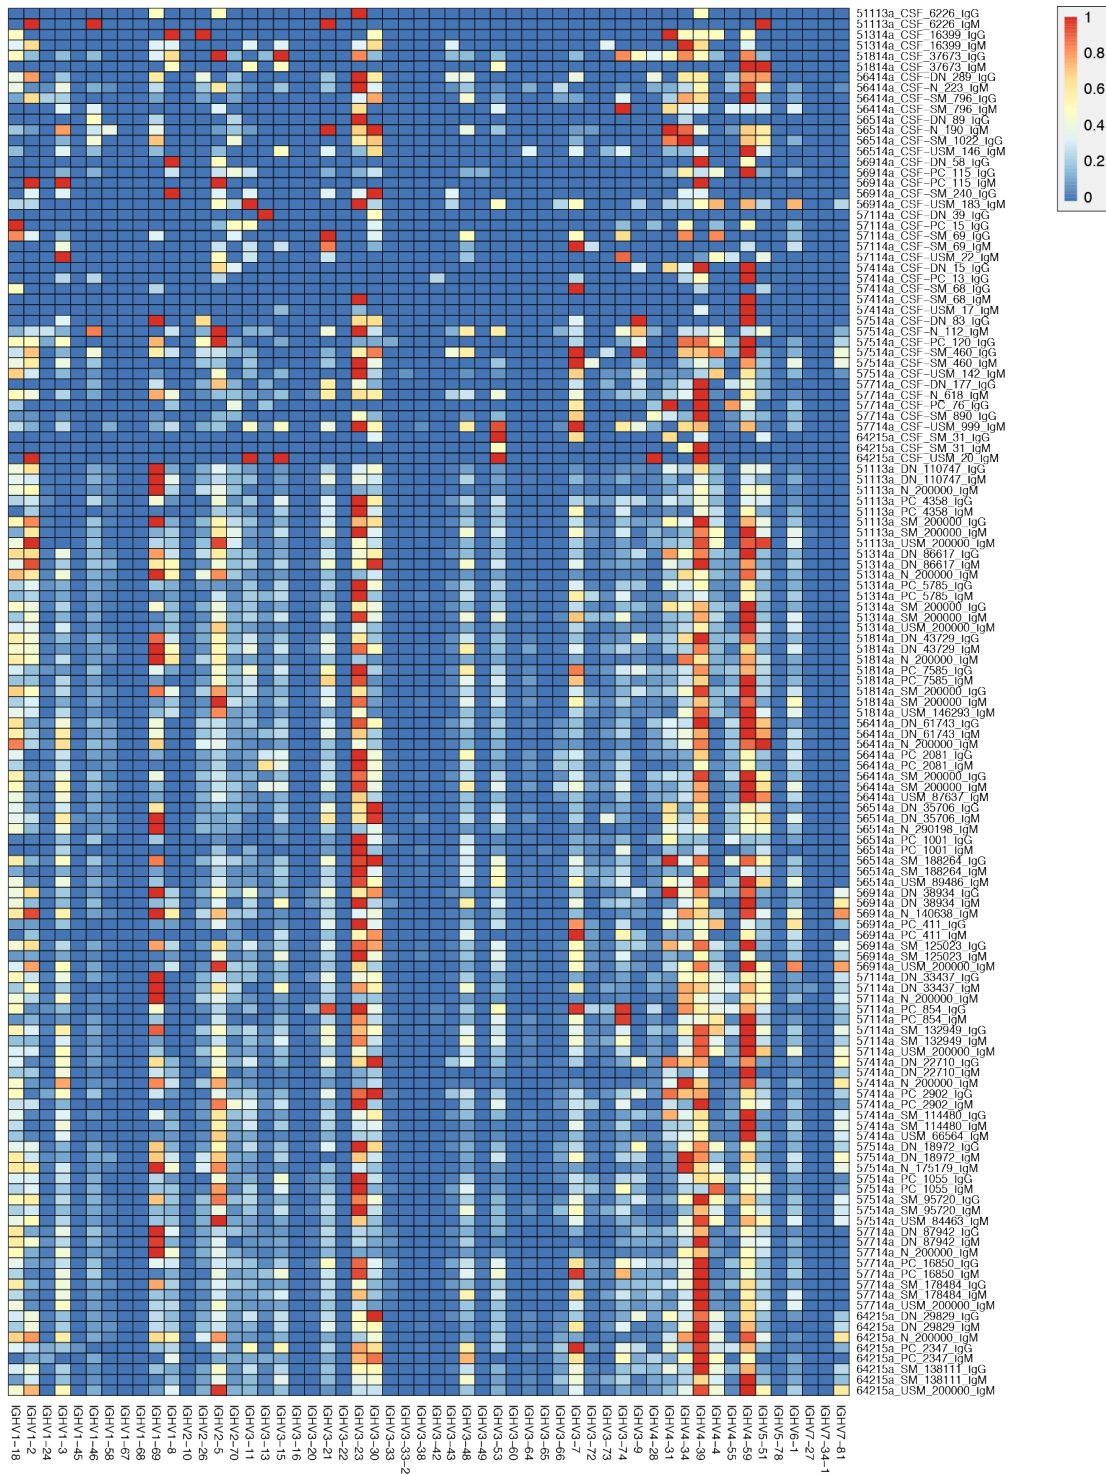

**Supplemental Figure S2. IGHV usage profiles per patients and subset/sample.** IGHV usage was normalized to the IGHV germline segment with the highest representation (=1, red). IGHV usage profiles are ordered by patient and B cell subset as indicated. Sample names contain Patient ID, B cell subset, number of cells analyzed, and Ig isotype separated by “\_”. CSF B cells subsets are indicated by “CSF” before the subset designation.

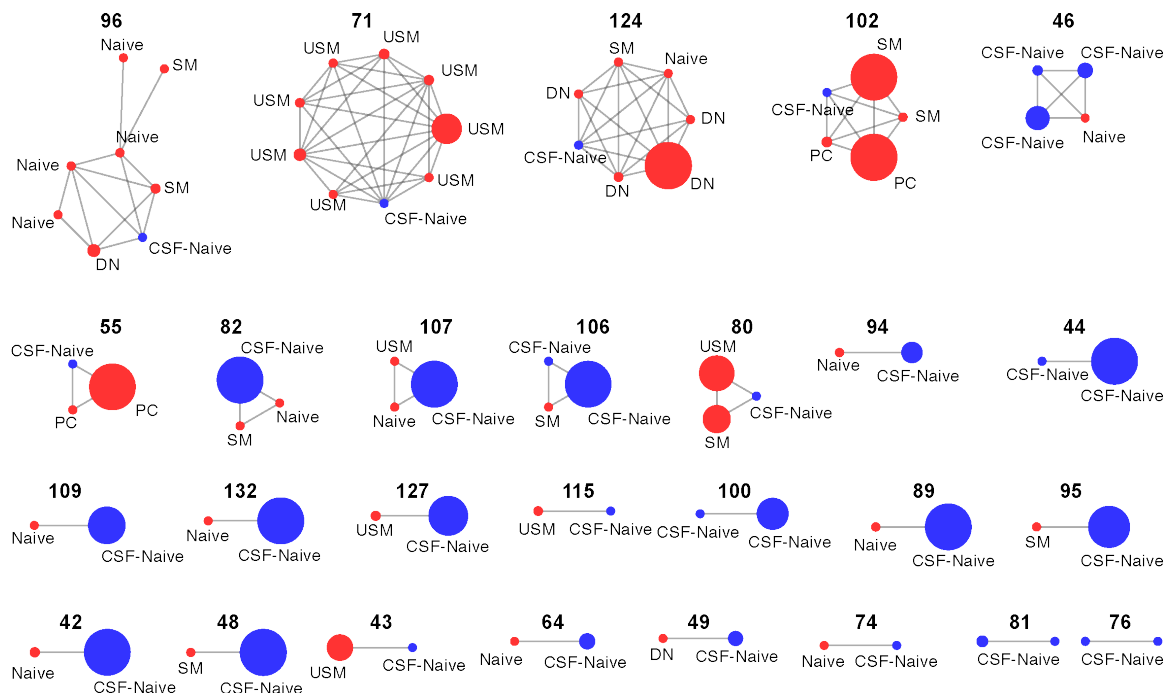

**Supplemental Figure S3: Clonal relationships between CSF naïve B cells and other CSF or PB B cell subsets in patient 56414.** Each cluster is displayed as a network consisting of nodes and connecting edges. Within a cluster the same IGHV and IGHJ germline segments are used. Each node represents a unique H-CDR3, connected nodes represent related Ig-VH sequences based on the applied distance metric (see Methods). Numbers above designate the cluster # as listed in **Supplemental Table S4**. Blue nodes are CSF B cell subsets; red nodes are PB B cell subsets. Please refer to **Table S4** for information on IGHV, IGHJ and CDR3 sequences represented in each cluster.



Supplemental Table S2

| Patient ID | Gd+? | Compartment | Subset     | Isotype | Sorted Cell Count | IonXpress BC | Sample Name                   | Sequence Count | CDR3 Count | Cluster Count | Comment        |
|------------|------|-------------|------------|---------|-------------------|--------------|-------------------------------|----------------|------------|---------------|----------------|
| 51113a     | no   | CSF         | Not Sorted | IgG     | 6,226             | 11           | 51113_a_CSf_6226_IGG_IGVH     | 29,439         | 5          | 5             |                |
| 51113a     | no   | CSF         | Not Sorted | IgM     | 6,226             | 16           | 51113_a_CSf_6226_IGM_IGVH     | 199            | 4          | 4             |                |
| 51113a     | no   | PB          | DN         | IgG     | 110,747           | 1            | 51113_a_DN_110747_IGG_IGVH    | 168,740        | 10,753     | 10,215        |                |
| 51113a     | no   | PB          | DN         | IgM     | 110,747           | 6            | 51113_a_DN_110747_IGM_IGVH    | 12,220         | 442        | 434           |                |
| 51113a     | no   | PB          | Naive      | IgM     | 200,000           | 7            | 51113_a_Naive_200000_IGM_IGVH | 33,965         | 11,224     | 10,895        |                |
| 51113a     | no   | PB          | PC         | IgG     | 4,358             | 5            | 51113_a_PC_4358_IGG_IGVH      | 194,750        | 408        | 388           |                |
| 51113a     | no   | PB          | PC         | IgM     | 4,358             | 10           | 51113_a_PC_4358_IGM_IGVH      | 57,581         | 205        | 199           |                |
| 51113a     | no   | PB          | SM         | IgG     | 200,000           | 4            | 51113_a_SM_200000_IGG_IGVH    | 168,014        | 12,384     | 10,908        |                |
| 51113a     | no   | PB          | SM         | IgM     | 200,000           | 9            | 51113_a_SM_200000_IGM_IGVH    | 16,685         | 644        | 585           |                |
| 51113a     | no   | PB          | USM        | IgM     | 200,000           | 8            | 51113_a_USM_200000_IGM_IGVH   | 61,303         | 9,307      | 8,075         |                |
| 51314a     | yes  | CSF         | Not Sorted | IgG     | 16,399            | 11           | 51314_a_CSf_16399_IGG_IGVH    | 15,001         | 12         | 12            |                |
| 51314a     | yes  | CSF         | Not Sorted | IgM     | 16,399            | 16           | 51314_a_CSf_16399_IGM_IGVH    | 321            | 18         | 16            |                |
| 51314a     | yes  | PB          | DN         | IgG     | 86,617            | 1            | 51314_a_DN_86617_IGG_IGVH     | 125,051        | 11,912     | 10,376        |                |
| 51314a     | yes  | PB          | DN         | IgM     | 86,617            | 6            | 51314_a_DN_86617_IGM_IGVH     | 23,557         | 1,793      | 1,628         |                |
| 51314a     | yes  | PB          | Naive      | IgM     | 200,000           | 7            | 51314_a_Naive_200000_IGM_IGVH | 25,075         | 11,523     | 11,017        |                |
| 51314a     | yes  | PB          | PC         | IgG     | 5,785             | 5            | 51314_a_PC_5785_IGG_IGVH      | 165,815        | 768        | 645           |                |
| 51314a     | yes  | PB          | PC         | IgM     | 5,785             | 10           | 51314_a_PC_5785_IGM_IGVH      | 44,492         | 506        | 426           |                |
| 51314a     | yes  | PB          | SM         | IgG     | 200,000           | 4            | 51314_a_SM_200000_IGG_IGVH    | 126,415        | 10,523     | 8,550         |                |
| 51314a     | yes  | PB          | SM         | IgM     | 200,000           | 9            | 51314_a_SM_200000_IGM_IGVH    | 48,503         | 2,945      | 2,391         |                |
| 51314a     | yes  | PB          | USM        | IgM     | 200,000           | 8            | 51314_a_USM_200000_IGM_IGVH   | 39,674         | 8,665      | 7,075         |                |
| 51814a     | yes  | CSF         | Not Sorted | IgG     | 37,673            | 11           | 51814_a_CSf_37673_IGG_IGVH    | 45,162         | 64         | 54            |                |
| 51814a     | yes  | CSF         | Not Sorted | IgM     | 37,673            | 16           | 51814_a_CSf_37673_IGM_IGVH    | 310            | 8          | 7             |                |
| 51814a     | yes  | PB          | DN         | IgG     | 43,729            | 1            | 51814_a_DN_43729_IGG_IGVH     | 244,134        | 7,218      | 6,073         |                |
| 51814a     | yes  | PB          | DN         | IgM     | 43,729            | 6            | 51814_a_DN_43729_IGM_IGVH     | 95,187         | 824        | 721           |                |
| 51814a     | yes  | PB          | Naive      | IgM     | 200,000           | 7            | 51814_a_Naive_200000_IGM_IGVH | 31,922         | 14,448     | 13,737        |                |
| 51814a     | yes  | PB          | PC         | IgG     | 7,585             | 5            | 51814_a_PC_7585_IGG_IGVH      | 149,672        | 1,374      | 1,102         |                |
| 51814a     | yes  | PB          | PC         | IgM     | 7,585             | 10           | 51814_a_PC_7585_IGM_IGVH      | 28,301         | 263        | 222           |                |
| 51814a     | yes  | PB          | SM         | IgG     | 200,000           | 4            | 51814_a_SM_200000_IGG_IGVH    | 155,514        | 11,005     | 9,296         |                |
| 51814a     | yes  | PB          | SM         | IgM     | 200,000           | 9            | 51814_a_SM_200000_IGM_IGVH    | 37,724         | 1,606      | 1,387         |                |
| 51814a     | yes  | PB          | USM        | IgM     | 146,293           | 8            | 51814_a_USM_146293_IGM_IGVH   | 47,180         | 12,353     | 10,700        |                |
| 56414a     | yes  | CSF         | CSF-DN     | IgG     | 289               | 11           | 56414_a_CSf-DN_289_IGG_IGVH   | 9,992          | 45         | 39            |                |
| 56414a     | yes  | CSF         | CSF-DN     | IgM     | 289               | 16           | 56414_a_CSf-DN_289_IGM_IGVH   |                |            |               | no PCR product |
| 56414a     | yes  | CSF         | CSF-Naive  | IgM     | 223               | 17           | 56414_a_CSf-N_223_IGM_IGVH    | 20,784         | 117        | 106           |                |
| 56414a     | yes  | CSF         | CSF-SM     | IgG     | 796               | 14           | 56414_a_CSf-SM_796_IGG_IGVH   | 13,622         | 60         | 46            |                |
| 56414a     | yes  | CSF         | CSF-SM     | IgM     | 796               | 19           | 56414_a_CSf-SM_796_IGM_IGVH   | 827            | 17         | 17            |                |
| 56414a     | yes  | PB          | DN         | IgG     | 61,743            | 1            | 56414_a_DN_61743_IGG_IGVH     | 267,539        | 9,603      | 8,404         |                |
| 56414a     | yes  | PB          | DN         | IgM     | 61,743            | 6            | 56414_a_DN_61743_IGM_IGVH     | 19,880         | 444        | 414           |                |
| 56414a     | yes  | PB          | Naive      | IgM     | 200,000           | 7            | 56414_a_Naive_200000_IGM_IGVH | 113,452        | 23,663     | 21,683        |                |
| 56414a     | yes  | PB          | PC         | IgG     | 2,081             | 5            | 56414_a_PC_2081_IGG_IGVH      | 274,661        | 423        | 352           |                |
| 56414a     | yes  | PB          | PC         | IgM     | 2,081             | 10           | 56414_a_PC_2081_IGM_IGVH      | 122,230        | 316        | 264           |                |
| 56414a     | yes  | PB          | SM         | IgG     | 200,000           | 4            | 56414_a_SM_200000_IGG_IGVH    | 286,422        | 12,117     | 9,459         |                |
| 56414a     | yes  | PB          | SM         | IgM     | 200,000           | 9            | 56414_a_SM_200000_IGM_IGVH    | 167,170        | 2,431      | 2,017         |                |
| 56414a     | yes  | PB          | USM        | IgM     | 87,637            | 8            | 56414_a_USM_87637_IGM_IGVH    | 120,860        | 11,071     | 9,403         |                |

|        |     |     |           |     |         |    |                               |         |        |        |                |
|--------|-----|-----|-----------|-----|---------|----|-------------------------------|---------|--------|--------|----------------|
| 56514a | yes | CSF | CSF-DN    | IgG | 89      | 11 | 56514_a_CSF-DN_89_IGG_IGVH    | 12,323  | 9      | 8      |                |
| 56514a | yes | CSF | CSF-DN    | IgM | 89      | 16 | 56514_a_CSF-DN_89_IGM_IGVH    |         |        |        | no PCR product |
| 56514a | yes | CSF | CSF-Naive | IgM | 190     | 17 | 56514_a_CSF-N_190_IGM_IGVH    | 13,464  | 98     | 76     |                |
| 56514a | yes | CSF | CSF-SM    | IgG | 1,022   | 14 | 56514_a_CSF-SM_1022_IGG_IGVH  | 18,009  | 45     | 35     |                |
| 56514a | yes | CSF | CSF-SM    | IgM | 1,022   | 19 | 56514_a_CSF-SM_1022_IGM_IGVH  |         |        |        | no PCR product |
| 56514a | yes | CSF | CSF-USM   | IgM | 146     | 18 | 56514_a_CSF-USM_146_IGM_IGVH  | 8,347   | 35     | 32     |                |
| 56514a | yes | PB  | DN        | IgG | 35,706  | 1  | 56514_a_DN_35706_IGG_IGVH     | 468,572 | 6,484  | 5,695  |                |
| 56514a | yes | PB  | DN        | IgM | 35,706  | 6  | 56514_a_DN_35706_IGM_IGVH     | 60,064  | 440    | 414    |                |
| 56514a | yes | PB  | Naive     | IgM | 290,198 | 7  | 56514_a_Naive_290198_IGM_IGVH | 97,141  | 28,145 | 25,591 |                |
| 56514a | yes | PB  | PC        | IgG | 1,001   | 5  | 56514_a_PC_1001_IGG_IGVH      | 207,193 | 195    | 143    |                |
| 56514a | yes | PB  | PC        | IgM | 1,001   | 10 | 56514_a_PC_1001_IGM_IGVH      | 41,942  | 83     | 64     |                |
| 56514a | yes | PB  | SM        | IgG | 188,264 | 4  | 56514_a_SM_188264_IGG_IGVH    | 248,277 | 11,067 | 8,918  |                |
| 56514a | yes | PB  | SM        | IgM | 188,264 | 9  | 56514_a_SM_188264_IGM_IGVH    | 78,580  | 1,624  | 1,266  |                |
| 56514a | yes | PB  | USM       | IgM | 89,500  | 8  | 56514_a_USM_89486_IGM_IGVH    | 125,008 | 10,769 | 8,313  |                |
| 56914a | yes | CSF | CSF-DN    | IgG | 58      | 11 | 56914_a_CSF-DN_58_IGG_IGVH    | 9,062   | 6      | 5      |                |
| 56914a | yes | CSF | CSF-DN    | IgM | 58      | 16 | 56914_a_CSF-DN_58_IGM_IGVH    |         |        |        | no PCR product |
| 56914a | yes | CSF | CSF-PC    | IgG | 115     | 12 | 56914_a_CSF-PC_115_IGG_IGVH   | 38,529  | 36     | 31     |                |
| 56914a | yes | CSF | CSF-PC    | IgM | 115     | 17 | 56914_a_CSF-PC_115_IGM_IGVH   | 70      | 4      | 4      |                |
| 56914a | yes | CSF | CSF-SM    | IgG | 240     | 14 | 56914_a_CSF-SM_240_IGG_IGVH   | 10,991  | 15     | 14     |                |
| 56914a | yes | CSF | CSF-SM    | IgM | 240     | 19 | 56914_a_CSF-SM_240_IGM_IGVH   |         |        |        | no PCR product |
| 56914a | yes | CSF | CSF-USM   | IgM | 183     | 18 | 56914_a_CSF-USM_183_IGM_IGVH  | 9,922   | 36     | 33     |                |
| 56914a | yes | PB  | DN        | IgG | 38,934  | 1  | 56914_a_DN_38934_IGG_IGVH     | 117,008 | 3,759  | 3,041  |                |
| 56914a | yes | PB  | DN        | IgM | 38,934  | 6  | 56914_a_DN_38934_IGM_IGVH     | 2,317   | 106    | 99     |                |
| 56914a | yes | PB  | Naive     | IgM | 140,638 | 7  | 56914_a_Naive_140638_IGM_IGVH | 25,680  | 7,644  | 7,153  |                |
| 56914a | yes | PB  | PC        | IgG | 411     | 5  | 56914_a_PC_411_IGG_IGVH       | 186,951 | 86     | 74     |                |
| 56914a | yes | PB  | PC        | IgM | 411     | 10 | 56914_a_PC_411_IGM_IGVH       | 59,757  | 65     | 51     |                |
| 56914a | yes | PB  | SM        | IgG | 125,023 | 4  | 56914_a_SM_125023_IGG_IGVH    | 136,854 | 5,775  | 4,359  |                |
| 56914a | yes | PB  | SM        | IgM | 125,023 | 9  | 56914_a_SM_125023_IGM_IGVH    | 35,914  | 785    | 653    |                |
| 56914a | yes | PB  | USM       | IgM | 200,000 | 8  | 56914_a_USM_200000_IGM_IGVH   | 40,230  | 6,076  | 4,879  |                |
| 57114a | yes | CSF | CSF-DN    | IgG | 39      | 11 | 57114_a_CSF-DN_39_IGG_IGVH    | 2,330   | 3      | 2      |                |
| 57114a | yes | CSF | CSF-DN    | IgM | 39      | 16 | 57114_a_CSF-DN_39_IGM_IGVH    |         | 0      |        | no Seq output  |
| 57114a | yes | CSF | CSF-PC    | IgG | 15      | 15 | 57114_a_CSF-PC_15_IGG_IGVH    | 162,519 | 25     | 17     |                |
| 57114a | yes | CSF | CSF-PC    | IgM | 15      | 20 | 57114_a_CSF-PC_15_IGM_IGVH    |         |        |        | no PCR product |
| 57114a | yes | CSF | CSF-SM    | IgG | 69      | 14 | 57114_a_CSF-SM_69_IGG_IGVH    | 38,278  | 41     | 23     |                |
| 57114a | yes | CSF | CSF-SM    | IgM | 69      | 19 | 57114_a_CSF-SM_69_IGM_IGVH    | 25,028  | 30     | 14     |                |
| 57114a | yes | CSF | CSF-USM   | IgM | 22      | 18 | 57114_a_CSF-USM_22_IGM_IGVH   | 40,091  | 45     | 18     |                |
| 57114a | yes | PB  | DN        | IgG | 33,437  | 1  | 57114_a_DN_33437_IGG_IGVH     | 365,122 | 16,183 | 7,027  |                |
| 57114a | yes | PB  | DN        | IgM | 33,437  | 6  | 57114_a_DN_33437_IGM_IGVH     | 9,253   | 361    | 199    |                |
| 57114a | yes | PB  | Naive     | IgM | 200,000 | 7  | 57114_a_Naive_200000_IGM_IGVH | 111,126 | 42,823 | 26,105 |                |
| 57114a | yes | PB  | PC        | IgG | 854     | 5  | 57114_a_PC_854_IGG_IGVH       | 812,305 | 550    | 223    |                |
| 57114a | yes | PB  | PC        | IgM | 854     | 10 | 57114_a_PC_854_IGM_IGVH       | 457,057 | 439    | 175    |                |
| 57114a | yes | PB  | SM        | IgG | 132,949 | 4  | 57114_a_SM_132949_IGG_IGVH    | 311,871 | 32,579 | 14,784 |                |
| 57114a | yes | PB  | SM        | IgM | 132,949 | 9  | 57114_a_SM_132949_IGM_IGVH    | 55,624  | 4,064  | 1,813  |                |
| 57114a | yes | PB  | USM       | IgM | 200,000 | 8  | 57114_a_USM_200000_IGM_IGVH   | 177,752 | 35,336 | 17,618 |                |

|        |     |     |           |     |         |    |                                |         |        |        |                |
|--------|-----|-----|-----------|-----|---------|----|--------------------------------|---------|--------|--------|----------------|
| 57414a | yes | CSF | CSF-DN    | IgG | 15      | 11 | 57414_a_CSF-DN_15_IgG_IGVH     | 25,921  | 13     | 13     |                |
| 57414a | yes | CSF | CSF-DN    | IgM | 15      | 16 | 57414_a_CSF-DN_15_IgM_IGVH     |         | 0      |        | no Seq output  |
| 57414a | yes | CSF | CSF-PC    | IgG | 13      | 15 | 57414_a_CSF-PC_13_IgG_IGVH     | 94,329  | 12     | 12     |                |
| 57414a | yes | CSF | CSF-PC    | IgM | 13      | 20 | 57414_a_CSF-PC_13_IgM_IGVH     |         | 0      |        | no Seq output  |
| 57414a | yes | CSF | CSF-SM    | IgG | 68      | 14 | 57414_a_CSF-SM_68_IgG_IGVH     | 41,002  | 9      | 8      |                |
| 57414a | yes | CSF | CSF-SM    | IgM | 68      | 19 | 57414_a_CSF-SM_68_IgM_IGVH     | 49      | 2      | 2      |                |
| 57414a | yes | CSF | CSF-USM   | IgM | 17      | 18 | 57414_a_CSF-USM_17_IgM_IGVH    | 37,726  | 10     | 8      |                |
| 57414a | yes | PB  | DN        | IgG | 22,710  | 1  | 57414_a_DN_22710_IgG_IGVH      | 316,567 | 3,031  | 2,816  |                |
| 57414a | yes | PB  | DN        | IgM | 22,710  | 6  | 57414_a_DN_22710_IgM_IGVH      | 7,289   | 111    | 108    |                |
| 57414a | yes | PB  | Naive     | IgM | 200,000 | 7  | 57414_a_Naive_200000_IgM_IGVH  | 72,032  | 11,984 | 11,230 |                |
| 57414a | yes | PB  | PC        | IgG | 2,902   | 5  | 57414_a_PC_2902_IgG_IGVH       | 447,199 | 737    | 629    |                |
| 57414a | yes | PB  | PC        | IgM | 2,902   | 10 | 57414_a_PC_2902_IgM_IGVH       | 19,714  | 116    | 102    |                |
| 57414a | yes | PB  | SM        | IgG | 114,480 | 4  | 57414_a_SM_114480_IgG_IGVH     | 320,904 | 7,893  | 6,851  |                |
| 57414a | yes | PB  | SM        | IgM | 114,480 | 9  | 57414_a_SM_114480_IgM_IGVH     | 30,831  | 378    | 339    |                |
| 57414a | yes | PB  | USM       | IgM | 66,564  | 8  | 57414_a_USM_66564_IgM_IGVH     | 91,225  | 5,532  | 4,721  |                |
| 57514a | yes | CSF | CSF-DN    | IgG | 83      | 11 | 57514_a_CSF-DN_83_IgG_IGVH     | 12,207  | 17     | 17     |                |
| 57514a | yes | CSF | CSF-DN    | IgM | 83      | 16 | 57514_a_CSF-DN_83_IgM_IGVH     |         |        |        | no PCR product |
| 57514a | yes | CSF | CSF-Naive | IgM | 112     | 17 | 57514_a_CSF-Naive_112_IgM_IGVH | 20,603  | 70     | 64     |                |
| 57514a | yes | CSF | CSF-PC    | IgG | 120     | 15 | 57514_a_CSF-PC_120_IgG_IGVH    | 86,860  | 72     | 63     |                |
| 57514a | yes | CSF | CSF-PC    | IgM | 120     | 20 | 57514_a_CSF-PC_120_IgM_IGVH    |         |        |        | no PCR product |
| 57514a | yes | CSF | CSF-SM    | IgG | 460     | 14 | 57514_a_CSF-SM_460_IgG_IGVH    | 23,018  | 86     | 76     |                |
| 57514a | yes | CSF | CSF-SM    | IgM | 460     | 19 | 57514_a_CSF-SM_460_IgM_IGVH    | 5,269   | 41     | 40     |                |
| 57514a | yes | CSF | CSF-USM   | IgM | 142     | 18 | 57514_a_CSF-USM_142_IgM_IGVH   | 24,981  | 90     | 77     |                |
| 57514a | yes | PB  | DN        | IgG | 18,972  | 1  | 57514_a_DN_18972_IgG_IGVH      | 234,237 | 3,501  | 3,083  |                |
| 57514a | yes | PB  | DN        | IgM | 18,972  | 6  | 57514_a_DN_18972_IgM_IGVH      | 12,379  | 171    | 166    |                |
| 57514a | yes | PB  | Naive     | IgM | 175,179 | 7  | 57514_a_Naive_175179_IgM_IGVH  | 41,366  | 15,564 | 14,609 |                |
| 57514a | yes | PB  | PC        | IgG | 1,055   | 5  | 57514_a_PC_1055_IgG_IGVH       | 297,734 | 300    | 253    |                |
| 57514a | yes | PB  | PC        | IgM | 1,055   | 10 | 57514_a_PC_1055_IgM_IGVH       | 81,405  | 172    | 150    |                |
| 57514a | yes | PB  | SM        | IgG | 95,720  | 4  | 57514_a_SM_95720_IgG_IGVH      | 179,831 | 10,694 | 8,947  |                |
| 57514a | yes | PB  | SM        | IgM | 95,720  | 9  | 57514_a_SM_95720_IgM_IGVH      | 103,148 | 889    | 777    |                |
| 57514a | yes | PB  | USM       | IgM | 84,463  | 8  | 57514_a_USM_84463_IgM_IGVH     | 105,211 | 13,176 | 10,700 |                |
| 57714a | yes | CSF | CSF-DN    | IgG | 177     | 11 | 57714_a_CSF-DN_177_IgG_IGVH    | 38,173  | 40     | 34     |                |
| 57714a | yes | CSF | CSF-DN    | IgM | 177     | 16 | 57714_a_CSF-DN_177_IgM_IGVH    |         |        |        | no PCR product |
| 57714a | yes | CSF | CSF-Naive | IgM | 618     | 17 | 57714_a_CSF-Naive_618_IgM_IGVH | 19,829  | 161    | 148    |                |
| 57714a | yes | CSF | CSF-PC    | IgG | 76      | 15 | 57714_a_CSF-PC_76_IgG_IGVH     | 18,207  | 26     | 21     |                |
| 57714a | yes | CSF | CSF-PC    | IgM | 76      | 20 | 57714_a_CSF-PC_76_IgM_IGVH     |         |        |        | no PCR product |
| 57714a | yes | CSF | CSF-SM    | IgG | 890     | 14 | 57714_a_CSF-SM_890_IgG_IGVH    | 47,695  | 61     | 56     |                |
| 57714a | yes | CSF | CSF-SM    | IgM | 890     | 19 | 57714_a_CSF-SM_890_IgM_IGVH    |         |        |        | no PCR product |
| 57714a | yes | CSF | CSF-USM   | IgM | 999     | 18 | 57714_a_CSF-USM_999_IgM_IGVH   | 14,283  | 161    | 149    |                |
| 57714a | yes | PB  | DN        | IgG | 87,942  | 1  | 57714_a_DN_87942_IgG_IGVH      | 128,218 | 6,558  | 5,922  |                |
| 57714a | yes | PB  | DN        | IgM | 87,942  | 6  | 57714_a_DN_87942_IgM_IGVH      | 7,232   | 189    | 178    |                |
| 57714a | yes | PB  | Naive     | IgM | 200,000 | 7  | 57714_a_Naive_200000_IgM_IGVH  | 29,454  | 10,115 | 9,628  |                |
| 57714a | yes | PB  | PC        | IgG | 16,850  | 5  | 57714_a_PC_16850_IgG_IGVH      | 224,678 | 760    | 675    |                |
| 57714a | yes | PB  | PC        | IgM | 16,850  | 10 | 57714_a_PC_16850_IgM_IGVH      | 99,562  | 697    | 615    |                |

|        |     |     |           |     |         |    |                                 |         |        |        |                |
|--------|-----|-----|-----------|-----|---------|----|---------------------------------|---------|--------|--------|----------------|
| 57714a | yes | PB  | SM        | IgG | 178,484 | 4  | 57714_a_SM_178484_IGG_IGVH      | 153,349 | 5,962  | 5,277  |                |
| 57714a | yes | PB  | SM        | IgM | 178,484 | 9  | 57714_a_SM_178484_IGM_IGVH      | 102,854 | 1,021  | 914    |                |
| 57714a | yes | PB  | USM       | IgM | 200,000 | 8  | 57714_a_USM_200000_IGM_IGVH     | 59,457  | 7,713  | 6,456  |                |
| 64215a | no  | CSF | CSF-DN    | IgG | 14      | 11 | 64215_a_CSF_DN_14_BCR_IgG       |         |        |        | no PCR product |
| 64215a | no  | CSF | CSF-DN    | IgM | 14      | 16 | 64215_a_CSF_DN_14_BCR_IgM       |         |        |        | no PCR product |
| 64215a | no  | CSF | CSF-Naive | IgM | 16      | 17 | 64215_a_CSF_Naive_16_BCR_IgM    |         |        |        | no PCR product |
| 64215a | no  | CSF | CSF-SM    | IgG | 31      | 14 | 64215_a_CSF_SM_31_BCR_IgG       | 25,489  | 10     | 10     |                |
| 64215a | no  | CSF | CSF-SM    | IgM | 31      | 19 | 64215_a_CSF_SM_31_BCR_IgM       | 12,045  | 4      | 4      |                |
| 64215a | no  | CSF | CSF-USM   | IgM | 20      | 18 | 64215_a_CSF_USM_20_BCR_IgM      | 27,026  | 6      | 6      |                |
| 64215a | no  | PB  | DN        | IgG | 29,829  | 1  | 64215_a_PB_DN_29829_BCR_IgG     | 273,609 | 4,964  | 4,494  |                |
| 64215a | no  | PB  | DN        | IgM | 29,829  | 6  | 64215_a_PB_DN_29829_BCR_IgM     | 11,364  | 346    | 324    |                |
| 64215a | no  | PB  | Naive     | IgM | 200,000 | 7  | 64215_a_PB_Naive_200000_BCR_IgM | 56,401  | 17,713 | 16,612 |                |
| 64215a | no  | PB  | PC        | IgG | 2,347   | 5  | 64215_a_PB_PC_2347_BCR_IgG      | 285,993 | 449    | 393    |                |
| 64215a | no  | PB  | PC        | IgM | 2,347   | 10 | 64215_a_PB_PC_2347_BCR_IgM      | 17,928  | 66     | 64     |                |
| 64215a | no  | PB  | SM        | IgG | 138,111 | 4  | 64215_a_PB_SM_138111_BCR_IgG    | 244,223 | 11,822 | 9,863  |                |
| 64215a | no  | PB  | SM        | IgM | 138,111 | 9  | 64215_a_PB_SM_138111_BCR_IgM    | 23,580  | 832    | 750    |                |
| 64215a | no  | PB  | USM       | IgM | 200,000 | 8  | 64215_a_PB_USM_200000_BCR_IgM   | 62,145  | 12,668 | 10,756 |                |



| Patient ID | Gd+/- | Comp 1 | Subset 1 | Isotype 1 | Comp 2 | Subset 2 | Isotype 2 | Frequency | CSR in CSF |
|------------|-------|--------|----------|-----------|--------|----------|-----------|-----------|------------|
| 51113      | Gd-   | CSF    | CSF      | IgG       | PB     | DN       | IgG       | 1         |            |
| 51113      | Gd-   | CSF    | CSF      | IgG       | PB     | PC       | IgG       | 1         |            |
| 51113      | Gd-   | CSF    | CSF      | IgG       | PB     | SM       | IgG       | 1         |            |
| 51113      | Gd-   | CSF    | CSF      | IgM       | PB     | DN       | IgG       | 1         |            |
| 51113      | Gd-   | PB     | DN       | IgG       | PB     | DN       | IgM       | 8         |            |
| 51113      | Gd-   | PB     | DN       | IgG       | PB     | N        | IgM       | 80        |            |
| 51113      | Gd-   | PB     | DN       | IgG       | PB     | PC       | IgM       | 3         |            |
| 51113      | Gd-   | PB     | DN       | IgG       | PB     | SM       | IgM       | 7         |            |
| 51113      | Gd-   | PB     | DN       | IgG       | PB     | USM      | IgM       | 84        |            |
| 51113      | Gd-   | PB     | DN       | IgG       | PB     | PC       | IgG       | 13        |            |
| 51113      | Gd-   | PB     | DN       | IgG       | PB     | SM       | IgG       | 248       |            |
| 51113      | Gd-   | PB     | DN       | IgM       | PB     | N        | IgM       | 16        |            |
| 51113      | Gd-   | PB     | DN       | IgM       | PB     | PC       | IgM       | 3         |            |
| 51113      | Gd-   | PB     | DN       | IgM       | PB     | SM       | IgM       | 10        |            |
| 51113      | Gd-   | PB     | DN       | IgM       | PB     | USM      | IgM       | 18        |            |
| 51113      | Gd-   | PB     | DN       | IgM       | PB     | SM       | IgG       | 6         |            |
| 51113      | Gd-   | PB     | N        | IgM       | PB     | PC       | IgM       | 3         |            |
| 51113      | Gd-   | PB     | N        | IgM       | PB     | SM       | IgM       | 8         |            |
| 51113      | Gd-   | PB     | N        | IgM       | PB     | USM      | IgM       | 176       |            |
| 51113      | Gd-   | PB     | N        | IgM       | PB     | PC       | IgG       | 3         |            |
| 51113      | Gd-   | PB     | N        | IgM       | PB     | SM       | IgG       | 51        |            |
| 51113      | Gd-   | PB     | PC       | IgG       | PB     | PC       | IgM       | 28        |            |
| 51113      | Gd-   | PB     | PC       | IgG       | PB     | SM       | IgM       | 8         |            |
| 51113      | Gd-   | PB     | PC       | IgG       | PB     | USM      | IgM       | 17        |            |
| 51113      | Gd-   | PB     | PC       | IgG       | PB     | SM       | IgG       | 100       |            |
| 51113      | Gd-   | PB     | PC       | IgM       | PB     | SM       | IgM       | 26        |            |
| 51113      | Gd-   | PB     | PC       | IgM       | PB     | USM      | IgM       | 36        |            |
| 51113      | Gd-   | PB     | PC       | IgM       | PB     | SM       | IgG       | 20        |            |
| 51113      | Gd-   | PB     | SM       | IgG       | PB     | SM       | IgM       | 54        |            |
| 51113      | Gd-   | PB     | SM       | IgG       | PB     | USM      | IgM       | 242       |            |
| 51113      | Gd-   | PB     | SM       | IgM       | PB     | USM      | IgM       | 137       |            |
| 51314      | Gd+   | CSF    | CSF      | IgG       | CSF    | CSF      | IgM       | 1         | Yes        |
| 51314      | Gd+   | CSF    | CSF      | IgG       | PB     | USM      | IgM       | 1         |            |
| 51314      | Gd+   | CSF    | CSF      | IgG       | PB     | DN       | IgG       | 1         |            |
| 51314      | Gd+   | CSF    | CSF      | IgG       | PB     | PC       | IgG       | 2         |            |
| 51314      | Gd+   | CSF    | CSF      | IgG       | PB     | SM       | IgG       | 4         |            |
| 51314      | Gd+   | CSF    | CSF      | IgM       | PB     | DN       | IgM       | 1         |            |
| 51314      | Gd+   | CSF    | CSF      | IgM       | PB     | PC       | IgM       | 1         |            |
| 51314      | Gd+   | CSF    | CSF      | IgM       | PB     | SM       | IgM       | 2         |            |
| 51314      | Gd+   | CSF    | CSF      | IgM       | PB     | USM      | IgM       | 8         |            |
| 51314      | Gd+   | CSF    | CSF      | IgM       | PB     | SM       | IgG       | 1         |            |

|       |     |     |     |     |     |     |     |     |     |
|-------|-----|-----|-----|-----|-----|-----|-----|-----|-----|
| 51314 | Gd+ | PB  | DN  | IgG | PB  | DN  | IgM | 57  |     |
| 51314 | Gd+ | PB  | DN  | IgG | PB  | N   | IgM | 116 |     |
| 51314 | Gd+ | PB  | DN  | IgG | PB  | PC  | IgM | 8   |     |
| 51314 | Gd+ | PB  | DN  | IgG | PB  | SM  | IgM | 40  |     |
| 51314 | Gd+ | PB  | DN  | IgG | PB  | USM | IgM | 75  |     |
| 51314 | Gd+ | PB  | DN  | IgG | PB  | PC  | IgG | 48  |     |
| 51314 | Gd+ | PB  | DN  | IgG | PB  | SM  | IgG | 465 |     |
| 51314 | Gd+ | PB  | DN  | IgM | PB  | N   | IgM | 47  |     |
| 51314 | Gd+ | PB  | DN  | IgM | PB  | PC  | IgM | 21  |     |
| 51314 | Gd+ | PB  | DN  | IgM | PB  | SM  | IgM | 133 |     |
| 51314 | Gd+ | PB  | DN  | IgM | PB  | USM | IgM | 148 |     |
| 51314 | Gd+ | PB  | DN  | IgM | PB  | PC  | IgG | 8   |     |
| 51314 | Gd+ | PB  | DN  | IgM | PB  | SM  | IgG | 37  |     |
| 51314 | Gd+ | PB  | N   | IgM | PB  | PC  | IgM | 16  |     |
| 51314 | Gd+ | PB  | N   | IgM | PB  | SM  | IgM | 40  |     |
| 51314 | Gd+ | PB  | N   | IgM | PB  | USM | IgM | 232 |     |
| 51314 | Gd+ | PB  | N   | IgM | PB  | PC  | IgG | 12  |     |
| 51314 | Gd+ | PB  | N   | IgM | PB  | SM  | IgG | 54  |     |
| 51314 | Gd+ | PB  | PC  | IgG | PB  | PC  | IgM | 68  |     |
| 51314 | Gd+ | PB  | PC  | IgG | PB  | SM  | IgM | 32  |     |
| 51314 | Gd+ | PB  | PC  | IgG | PB  | USM | IgM | 30  |     |
| 51314 | Gd+ | PB  | PC  | IgG | PB  | SM  | IgG | 133 |     |
| 51314 | Gd+ | PB  | PC  | IgM | PB  | SM  | IgM | 94  |     |
| 51314 | Gd+ | PB  | PC  | IgM | PB  | USM | IgM | 96  |     |
| 51314 | Gd+ | PB  | PC  | IgM | PB  | SM  | IgG | 29  |     |
| 51314 | Gd+ | PB  | SM  | IgG | PB  | SM  | IgM | 225 |     |
| 51314 | Gd+ | PB  | SM  | IgG | PB  | USM | IgM | 244 |     |
| 51314 | Gd+ | PB  | SM  | IgM | PB  | USM | IgM | 486 |     |
| 51814 | Gd+ | CSF | CSF | IgG | CSF | CSF | IgM | 1   | Yes |
| 51814 | Gd+ | CSF | CSF | IgG | PB  | DN  | IgM | 1   |     |
| 51814 | Gd+ | CSF | CSF | IgG | PB  | N   | IgM | 2   |     |
| 51814 | Gd+ | CSF | CSF | IgG | PB  | SM  | IgM | 1   |     |
| 51814 | Gd+ | CSF | CSF | IgG | PB  | USM | IgM | 2   |     |
| 51814 | Gd+ | CSF | CSF | IgG | PB  | DN  | IgG | 6   |     |
| 51814 | Gd+ | CSF | CSF | IgG | PB  | PC  | IgG | 7   |     |
| 51814 | Gd+ | CSF | CSF | IgG | PB  | SM  | IgG | 15  |     |
| 51814 | Gd+ | CSF | CSF | IgM | PB  | USM | IgM | 1   |     |
| 51814 | Gd+ | PB  | DN  | IgG | PB  | DN  | IgM | 21  |     |
| 51814 | Gd+ | PB  | DN  | IgG | PB  | N   | IgM | 41  |     |
| 51814 | Gd+ | PB  | DN  | IgG | PB  | PC  | IgM | 2   |     |
| 51814 | Gd+ | PB  | DN  | IgG | PB  | SM  | IgM | 12  |     |
| 51814 | Gd+ | PB  | DN  | IgG | PB  | USM | IgM | 46  |     |

|       |     |     |    |     |     |     |     |     |     |
|-------|-----|-----|----|-----|-----|-----|-----|-----|-----|
| 51814 | Gd+ | PB  | DN | IgG | PB  | PC  | IgG | 59  |     |
| 51814 | Gd+ | PB  | DN | IgG | PB  | SM  | IgG | 257 |     |
| 51814 | Gd+ | PB  | DN | IgM | PB  | N   | IgM | 23  |     |
| 51814 | Gd+ | PB  | DN | IgM | PB  | PC  | IgM | 4   |     |
| 51814 | Gd+ | PB  | DN | IgM | PB  | SM  | IgM | 26  |     |
| 51814 | Gd+ | PB  | DN | IgM | PB  | USM | IgM | 35  |     |
| 51814 | Gd+ | PB  | DN | IgM | PB  | PC  | IgG | 5   |     |
| 51814 | Gd+ | PB  | DN | IgM | PB  | SM  | IgG | 20  |     |
| 51814 | Gd+ | PB  | N  | IgM | PB  | PC  | IgM | 3   |     |
| 51814 | Gd+ | PB  | N  | IgM | PB  | SM  | IgM | 26  |     |
| 51814 | Gd+ | PB  | N  | IgM | PB  | USM | IgM | 188 |     |
| 51814 | Gd+ | PB  | N  | IgM | PB  | PC  | IgG | 12  |     |
| 51814 | Gd+ | PB  | N  | IgM | PB  | SM  | IgG | 45  |     |
| 51814 | Gd+ | PB  | PC | IgG | PB  | PC  | IgM | 42  |     |
| 51814 | Gd+ | PB  | PC | IgG | PB  | SM  | IgM | 34  |     |
| 51814 | Gd+ | PB  | PC | IgG | PB  | USM | IgM | 28  |     |
| 51814 | Gd+ | PB  | PC | IgG | PB  | SM  | IgG | 330 |     |
| 51814 | Gd+ | PB  | PC | IgM | PB  | SM  | IgM | 47  |     |
| 51814 | Gd+ | PB  | PC | IgM | PB  | USM | IgM | 45  |     |
| 51814 | Gd+ | PB  | PC | IgM | PB  | SM  | IgG | 33  |     |
| 51814 | Gd+ | PB  | SM | IgG | PB  | SM  | IgM | 130 |     |
| 51814 | Gd+ | PB  | SM | IgG | PB  | USM | IgM | 179 |     |
| 51814 | Gd+ | PB  | SM | IgM | PB  | USM | IgM | 244 |     |
| 56414 | Gd+ | CSF | DN | IgG | CSF | SM  | IgG | 6   |     |
| 56414 | Gd+ | CSF | DN | IgG | PB  | SM  | IgM | 2   |     |
| 56414 | Gd+ | CSF | DN | IgG | PB  | DN  | IgG | 12  |     |
| 56414 | Gd+ | CSF | DN | IgG | PB  | PC  | IgG | 2   |     |
| 56414 | Gd+ | CSF | DN | IgG | PB  | SM  | IgG | 13  |     |
| 56414 | Gd+ | CSF | N  | IgM | PB  | DN  | IgM | 1   |     |
| 56414 | Gd+ | CSF | N  | IgM | PB  | N   | IgM | 12  |     |
| 56414 | Gd+ | CSF | N  | IgM | PB  | PC  | IgM | 2   |     |
| 56414 | Gd+ | CSF | N  | IgM | PB  | SM  | IgM | 7   |     |
| 56414 | Gd+ | CSF | N  | IgM | PB  | USM | IgM | 6   |     |
| 56414 | Gd+ | CSF | N  | IgM | PB  | DN  | IgG | 3   |     |
| 56414 | Gd+ | CSF | N  | IgM | PB  | PC  | IgG | 2   |     |
| 56414 | Gd+ | CSF | N  | IgM | PB  | SM  | IgG | 3   |     |
| 56414 | Gd+ | CSF | SM | IgG | CSF | SM  | IgM | 2   | Yes |
| 56414 | Gd+ | CSF | SM | IgG | PB  | N   | IgM | 1   |     |
| 56414 | Gd+ | CSF | SM | IgG | PB  | PC  | IgM | 1   |     |
| 56414 | Gd+ | CSF | SM | IgG | PB  | SM  | IgM | 6   |     |
| 56414 | Gd+ | CSF | SM | IgG | PB  | USM | IgM | 2   |     |
| 56414 | Gd+ | CSF | SM | IgG | PB  | DN  | IgG | 14  |     |

|       |     |     |    |     |    |     |     |     |
|-------|-----|-----|----|-----|----|-----|-----|-----|
| 56414 | Gd+ | CSF | SM | IgG | PB | PC  | IgG | 7   |
| 56414 | Gd+ | CSF | SM | IgG | PB | SM  | IgG | 26  |
| 56414 | Gd+ | CSF | SM | IgM | PB | N   | IgM | 1   |
| 56414 | Gd+ | CSF | SM | IgM | PB | PC  | IgM | 1   |
| 56414 | Gd+ | CSF | SM | IgM | PB | SM  | IgM | 3   |
| 56414 | Gd+ | CSF | SM | IgM | PB | USM | IgM | 5   |
| 56414 | Gd+ | CSF | SM | IgM | PB | DN  | IgG | 3   |
| 56414 | Gd+ | CSF | SM | IgM | PB | PC  | IgG | 1   |
| 56414 | Gd+ | CSF | SM | IgM | PB | SM  | IgG | 4   |
| 56414 | Gd+ | PB  | DN | IgG | PB | DN  | IgM | 100 |
| 56414 | Gd+ | PB  | DN | IgG | PB | N   | IgM | 124 |
| 56414 | Gd+ | PB  | DN | IgG | PB | PC  | IgM | 15  |
| 56414 | Gd+ | PB  | DN | IgG | PB | SM  | IgM | 58  |
| 56414 | Gd+ | PB  | DN | IgG | PB | USM | IgM | 83  |
| 56414 | Gd+ | PB  | DN | IgG | PB | PC  | IgG | 33  |
| 56414 | Gd+ | PB  | DN | IgG | PB | SM  | IgG | 342 |
| 56414 | Gd+ | PB  | DN | IgM | PB | N   | IgM | 61  |
| 56414 | Gd+ | PB  | DN | IgM | PB | PC  | IgM | 13  |
| 56414 | Gd+ | PB  | DN | IgM | PB | SM  | IgM | 38  |
| 56414 | Gd+ | PB  | DN | IgM | PB | USM | IgM | 35  |
| 56414 | Gd+ | PB  | DN | IgM | PB | PC  | IgG | 12  |
| 56414 | Gd+ | PB  | DN | IgM | PB | SM  | IgG | 21  |
| 56414 | Gd+ | PB  | N  | IgM | PB | PC  | IgM | 25  |
| 56414 | Gd+ | PB  | N  | IgM | PB | SM  | IgM | 87  |
| 56414 | Gd+ | PB  | N  | IgM | PB | USM | IgM | 300 |
| 56414 | Gd+ | PB  | N  | IgM | PB | PC  | IgG | 18  |
| 56414 | Gd+ | PB  | N  | IgM | PB | SM  | IgG | 102 |
| 56414 | Gd+ | PB  | PC | IgG | PB | PC  | IgM | 128 |
| 56414 | Gd+ | PB  | PC | IgG | PB | SM  | IgM | 75  |
| 56414 | Gd+ | PB  | PC | IgG | PB | USM | IgM | 44  |
| 56414 | Gd+ | PB  | PC | IgG | PB | SM  | IgG | 114 |
| 56414 | Gd+ | PB  | PC | IgM | PB | SM  | IgM | 99  |
| 56414 | Gd+ | PB  | PC | IgM | PB | USM | IgM | 65  |
| 56414 | Gd+ | PB  | PC | IgM | PB | SM  | IgG | 57  |
| 56414 | Gd+ | PB  | SM | IgG | PB | SM  | IgM | 515 |
| 56414 | Gd+ | PB  | SM | IgG | PB | USM | IgM | 238 |
| 56414 | Gd+ | PB  | SM | IgM | PB | USM | IgM | 332 |
| 56514 | Gd+ | CSF | DN | IgG | PB | PC  | IgM | 1   |
| 56514 | Gd+ | CSF | DN | IgG | PB | USM | IgM | 1   |
| 56514 | Gd+ | CSF | DN | IgG | PB | DN  | IgG | 2   |
| 56514 | Gd+ | CSF | DN | IgG | PB | PC  | IgG | 3   |
| 56514 | Gd+ | CSF | DN | IgG | PB | SM  | IgG | 5   |

|       |     |     |     |     |     |     |     |     |
|-------|-----|-----|-----|-----|-----|-----|-----|-----|
| 56514 | Gd+ | CSF | DN  | IgG | CSF | SM  | IgG | 3   |
| 56514 | Gd+ | CSF | N   | IgM | PB  | PC  | IgM | 1   |
| 56514 | Gd+ | CSF | N   | IgM | PB  | SM  | IgM | 1   |
| 56514 | Gd+ | CSF | N   | IgM | PB  | USM | IgM | 3   |
| 56514 | Gd+ | CSF | N   | IgM | PB  | PC  | IgG | 1   |
| 56514 | Gd+ | CSF | N   | IgM | PB  | N   | IgM | 2   |
| 56514 | Gd+ | CSF | SM  | IgG | PB  | DN  | IgG | 4   |
| 56514 | Gd+ | CSF | SM  | IgG | PB  | PC  | IgG | 2   |
| 56514 | Gd+ | CSF | SM  | IgG | PB  | SM  | IgG | 16  |
| 56514 | Gd+ | CSF | USM | IgM | PB  | N   | IgM | 5   |
| 56514 | Gd+ | CSF | USM | IgM | PB  | PC  | IgM | 1   |
| 56514 | Gd+ | CSF | USM | IgM | PB  | SM  | IgM | 2   |
| 56514 | Gd+ | CSF | USM | IgM | PB  | USM | IgM | 14  |
| 56514 | Gd+ | CSF | USM | IgM | PB  | SM  | IgG | 2   |
| 56514 | Gd+ | PB  | DN  | IgG | PB  | DN  | IgM | 126 |
| 56514 | Gd+ | PB  | DN  | IgG | PB  | N   | IgM | 63  |
| 56514 | Gd+ | PB  | DN  | IgG | PB  | PC  | IgM | 1   |
| 56514 | Gd+ | PB  | DN  | IgG | PB  | SM  | IgM | 13  |
| 56514 | Gd+ | PB  | DN  | IgG | PB  | USM | IgM | 41  |
| 56514 | Gd+ | PB  | DN  | IgG | PB  | PC  | IgG | 22  |
| 56514 | Gd+ | PB  | DN  | IgG | PB  | SM  | IgG | 189 |
| 56514 | Gd+ | PB  | DN  | IgM | PB  | N   | IgM | 65  |
| 56514 | Gd+ | PB  | DN  | IgM | PB  | SM  | IgM | 20  |
| 56514 | Gd+ | PB  | DN  | IgM | PB  | USM | IgM | 21  |
| 56514 | Gd+ | PB  | DN  | IgM | PB  | PC  | IgG | 1   |
| 56514 | Gd+ | PB  | DN  | IgM | PB  | SM  | IgG | 11  |
| 56514 | Gd+ | PB  | N   | IgM | PB  | PC  | IgM | 4   |
| 56514 | Gd+ | PB  | N   | IgM | PB  | SM  | IgM | 28  |
| 56514 | Gd+ | PB  | N   | IgM | PB  | USM | IgM | 256 |
| 56514 | Gd+ | PB  | N   | IgM | PB  | PC  | IgG | 4   |
| 56514 | Gd+ | PB  | N   | IgM | PB  | SM  | IgG | 104 |
| 56514 | Gd+ | PB  | PC  | IgG | PB  | PC  | IgM | 21  |
| 56514 | Gd+ | PB  | PC  | IgG | PB  | SM  | IgM | 8   |
| 56514 | Gd+ | PB  | PC  | IgG | PB  | USM | IgM | 9   |
| 56514 | Gd+ | PB  | PC  | IgG | PB  | SM  | IgG | 38  |
| 56514 | Gd+ | PB  | PC  | IgM | PB  | SM  | IgM | 16  |
| 56514 | Gd+ | PB  | PC  | IgM | PB  | USM | IgM | 18  |
| 56514 | Gd+ | PB  | PC  | IgM | PB  | SM  | IgG | 10  |
| 56514 | Gd+ | PB  | SM  | IgG | PB  | SM  | IgM | 173 |
| 56514 | Gd+ | PB  | SM  | IgG | PB  | USM | IgM | 193 |
| 56514 | Gd+ | PB  | SM  | IgM | PB  | USM | IgM | 268 |
| 56914 | Gd+ | CSF | DN  | IgG | PB  | DN  | IgG | 1   |

|       |     |     |     |     |     |     |     |     |     |
|-------|-----|-----|-----|-----|-----|-----|-----|-----|-----|
| 56914 | Gd+ | CSF | DN  | IgG | PB  | SM  | IgG | 2   |     |
| 56914 | Gd+ | CSF | DN  | IgG | CSF | SM  | IgG | 1   |     |
| 56914 | Gd+ | CSF | PC  | IgG | PB  | PC  | IgM | 1   |     |
| 56914 | Gd+ | CSF | PC  | IgG | CSF | PC  | IgM | 2   | Yes |
| 56914 | Gd+ | CSF | PC  | IgG | CSF | SM  | IgG | 3   |     |
| 56914 | Gd+ | CSF | PC  | IgG | PB  | USM | IgM | 2   |     |
| 56914 | Gd+ | CSF | PC  | IgG | PB  | DN  | IgG | 6   |     |
| 56914 | Gd+ | CSF | PC  | IgG | PB  | PC  | IgG | 2   |     |
| 56914 | Gd+ | CSF | PC  | IgG | PB  | SM  | IgG | 9   |     |
| 56914 | Gd+ | CSF | PC  | IgG | PB  | N   | IgM | 1   |     |
| 56914 | Gd+ | CSF | PC  | IgM | PB  | USM | IgM | 1   |     |
| 56914 | Gd+ | CSF | PC  | IgM | CSF | SM  | IgG | 2   | Yes |
| 56914 | Gd+ | CSF | PC  | IgM | PB  | DN  | IgG | 1   |     |
| 56914 | Gd+ | CSF | PC  | IgM | PB  | SM  | IgG | 2   |     |
| 56914 | Gd+ | CSF | PC  | IgM | PB  | N   | IgM | 1   |     |
| 56914 | Gd+ | CSF | SM  | IgG | PB  | N   | IgM | 1   |     |
| 56914 | Gd+ | CSF | SM  | IgG | PB  | USM | IgM | 1   |     |
| 56914 | Gd+ | CSF | SM  | IgG | PB  | DN  | IgG | 1   |     |
| 56914 | Gd+ | CSF | SM  | IgG | PB  | SM  | IgG | 3   |     |
| 56914 | Gd+ | CSF | USM | IgM | PB  | N   | IgM | 1   |     |
| 56914 | Gd+ | CSF | USM | IgM | PB  | USM | IgM | 7   |     |
| 56914 | Gd+ | PB  | DN  | IgG | PB  | DN  | IgM | 7   |     |
| 56914 | Gd+ | PB  | DN  | IgG | PB  | N   | IgM | 31  |     |
| 56914 | Gd+ | PB  | DN  | IgG | PB  | PC  | IgM | 1   |     |
| 56914 | Gd+ | PB  | DN  | IgG | PB  | SM  | IgM | 7   |     |
| 56914 | Gd+ | PB  | DN  | IgG | PB  | USM | IgM | 27  |     |
| 56914 | Gd+ | PB  | DN  | IgG | PB  | PC  | IgG | 5   |     |
| 56914 | Gd+ | PB  | DN  | IgG | PB  | SM  | IgG | 224 |     |
| 56914 | Gd+ | PB  | DN  | IgM | PB  | N   | IgM | 12  |     |
| 56914 | Gd+ | PB  | DN  | IgM | PB  | PC  | IgM | 1   |     |
| 56914 | Gd+ | PB  | DN  | IgM | PB  | SM  | IgM | 6   |     |
| 56914 | Gd+ | PB  | DN  | IgM | PB  | USM | IgM | 7   |     |
| 56914 | Gd+ | PB  | DN  | IgM | PB  | PC  | IgG | 1   |     |
| 56914 | Gd+ | PB  | DN  | IgM | PB  | SM  | IgG | 3   |     |
| 56914 | Gd+ | PB  | N   | IgM | PB  | PC  | IgM | 4   |     |
| 56914 | Gd+ | PB  | N   | IgM | PB  | SM  | IgM | 14  |     |
| 56914 | Gd+ | PB  | N   | IgM | PB  | USM | IgM | 194 |     |
| 56914 | Gd+ | PB  | N   | IgM | PB  | PC  | IgG | 2   |     |
| 56914 | Gd+ | PB  | N   | IgM | PB  | SM  | IgG | 41  |     |
| 56914 | Gd+ | PB  | PC  | IgG | PB  | PC  | IgM | 18  |     |
| 56914 | Gd+ | PB  | PC  | IgG | PB  | SM  | IgM | 9   |     |
| 56914 | Gd+ | PB  | PC  | IgG | PB  | USM | IgM | 6   |     |

|       |     |     |     |     |     |     |     |     |     |
|-------|-----|-----|-----|-----|-----|-----|-----|-----|-----|
| 56914 | Gd+ | PB  | PC  | IgG | PB  | SM  | IgG | 27  |     |
| 56914 | Gd+ | PB  | PC  | IgM | PB  | SM  | IgM | 15  |     |
| 56914 | Gd+ | PB  | PC  | IgM | PB  | USM | IgM | 10  |     |
| 56914 | Gd+ | PB  | PC  | IgM | PB  | SM  | IgG | 8   |     |
| 56914 | Gd+ | PB  | SM  | IgG | PB  | SM  | IgM | 76  |     |
| 56914 | Gd+ | PB  | SM  | IgG | PB  | USM | IgM | 121 |     |
| 56914 | Gd+ | PB  | SM  | IgM | PB  | USM | IgM | 112 |     |
| 57114 | Gd+ | CSF | PC  | IgG | PB  | PC  | IgM | 1   |     |
| 57114 | Gd+ | CSF | PC  | IgG | PB  | DN  | IgG | 3   |     |
| 57114 | Gd+ | CSF | PC  | IgG | PB  | PC  | IgG | 5   |     |
| 57114 | Gd+ | CSF | PC  | IgG | PB  | SM  | IgG | 8   |     |
| 57114 | Gd+ | CSF | PC  | IgG | CSF | SM  | IgG | 2   |     |
| 57114 | Gd+ | CSF | SM  | IgG | CSF | SM  | IgM | 4   | Yes |
| 57114 | Gd+ | CSF | SM  | IgG | PB  | N   | IgM | 2   |     |
| 57114 | Gd+ | CSF | SM  | IgG | PB  | DN  | IgM | 1   |     |
| 57114 | Gd+ | CSF | SM  | IgG | PB  | SM  | IgM | 2   |     |
| 57114 | Gd+ | CSF | SM  | IgG | PB  | USM | IgM | 2   |     |
| 57114 | Gd+ | CSF | SM  | IgG | PB  | DN  | IgG | 1   |     |
| 57114 | Gd+ | CSF | SM  | IgG | PB  | PC  | IgG | 2   |     |
| 57114 | Gd+ | CSF | SM  | IgG | PB  | SM  | IgG | 7   |     |
| 57114 | Gd+ | CSF | SM  | IgM | CSF | USM | IgM | 2   |     |
| 57114 | Gd+ | CSF | SM  | IgM | PB  | N   | IgM | 2   |     |
| 57114 | Gd+ | CSF | SM  | IgM | PB  | DN  | IgM | 1   |     |
| 57114 | Gd+ | CSF | SM  | IgM | PB  | PC  | IgM | 1   |     |
| 57114 | Gd+ | CSF | SM  | IgM | PB  | SM  | IgM | 3   |     |
| 57114 | Gd+ | CSF | SM  | IgM | PB  | USM | IgM | 5   |     |
| 57114 | Gd+ | CSF | SM  | IgM | PB  | SM  | IgG | 3   |     |
| 57114 | Gd+ | CSF | USM | IgM | PB  | N   | IgM | 2   |     |
| 57114 | Gd+ | CSF | USM | IgM | PB  | PC  | IgM | 1   |     |
| 57114 | Gd+ | CSF | USM | IgM | PB  | SM  | IgM | 7   |     |
| 57114 | Gd+ | CSF | USM | IgM | PB  | USM | IgM | 8   |     |
| 57114 | Gd+ | CSF | USM | IgM | PB  | DN  | IgG | 1   |     |
| 57114 | Gd+ | CSF | USM | IgM | PB  | SM  | IgG | 4   |     |
| 57114 | Gd+ | PB  | DN  | IgG | PB  | DN  | IgM | 1   |     |
| 57114 | Gd+ | PB  | DN  | IgG | PB  | N   | IgM | 104 |     |
| 57114 | Gd+ | PB  | DN  | IgG | PB  | PC  | IgM | 8   |     |
| 57114 | Gd+ | PB  | DN  | IgG | PB  | SM  | IgM | 10  |     |
| 57114 | Gd+ | PB  | DN  | IgG | PB  | USM | IgM | 72  |     |
| 57114 | Gd+ | PB  | DN  | IgG | PB  | PC  | IgG | 24  |     |
| 57114 | Gd+ | PB  | DN  | IgG | PB  | SM  | IgG | 280 |     |
| 57114 | Gd+ | PB  | DN  | IgM | PB  | N   | IgM | 48  |     |
| 57114 | Gd+ | PB  | DN  | IgM | PB  | PC  | IgM | 7   |     |

|       |     |     |     |     |     |     |     |     |
|-------|-----|-----|-----|-----|-----|-----|-----|-----|
| 57114 | Gd+ | PB  | DN  | IgM | PB  | SM  | IgM | 17  |
| 57114 | Gd+ | PB  | DN  | IgM | PB  | USM | IgM | 33  |
| 57114 | Gd+ | PB  | DN  | IgM | PB  | PC  | IgG | 6   |
| 57114 | Gd+ | PB  | DN  | IgM | PB  | SM  | IgG | 5   |
| 57114 | Gd+ | PB  | N   | IgM | PB  | PC  | IgM | 21  |
| 57114 | Gd+ | PB  | N   | IgM | PB  | SM  | IgM | 75  |
| 57114 | Gd+ | PB  | N   | IgM | PB  | USM | IgM | 733 |
| 57114 | Gd+ | PB  | N   | IgM | PB  | PC  | IgG | 9   |
| 57114 | Gd+ | PB  | N   | IgM | PB  | SM  | IgG | 170 |
| 57114 | Gd+ | PB  | PC  | IgG | PB  | PC  | IgM | 45  |
| 57114 | Gd+ | PB  | PC  | IgG | PB  | SM  | IgM | 18  |
| 57114 | Gd+ | PB  | PC  | IgG | PB  | USM | IgM | 24  |
| 57114 | Gd+ | PB  | PC  | IgG | PB  | SM  | IgG | 71  |
| 57114 | Gd+ | PB  | PC  | IgM | PB  | SM  | IgM | 36  |
| 57114 | Gd+ | PB  | PC  | IgM | PB  | USM | IgM | 56  |
| 57114 | Gd+ | PB  | PC  | IgM | PB  | SM  | IgG | 22  |
| 57114 | Gd+ | PB  | SM  | IgG | PB  | SM  | IgM | 153 |
| 57114 | Gd+ | PB  | SM  | IgG | PB  | USM | IgM | 456 |
| 57114 | Gd+ | PB  | SM  | IgM | PB  | USM | IgM | 486 |
| 57414 | Gd+ | CSF | DN  | IgG | PB  | PC  | IgG | 1   |
| 57414 | Gd+ | CSF | DN  | IgG | PB  | SM  | IgG | 4   |
| 57414 | Gd+ | CSF | PC  | IgG | PB  | DN  | IgG | 1   |
| 57414 | Gd+ | CSF | PC  | IgG | PB  | PC  | IgG | 2   |
| 57414 | Gd+ | CSF | PC  | IgG | PB  | SM  | IgG | 4   |
| 57414 | Gd+ | CSF | PC  | IgG | CSF | SM  | IgG | 1   |
| 57414 | Gd+ | CSF | SM  | IgG | PB  | PC  | IgG | 1   |
| 57414 | Gd+ | CSF | SM  | IgG | PB  | SM  | IgG | 2   |
| 57414 | Gd+ | CSF | SM  | IgM | CSF | USM | IgM | 1   |
| 57414 | Gd+ | CSF | SM  | IgM | PB  | SM  | IgM | 1   |
| 57414 | Gd+ | CSF | USM | IgM | PB  | DN  | IgM | 1   |
| 57414 | Gd+ | CSF | USM | IgM | PB  | PC  | IgM | 1   |
| 57414 | Gd+ | CSF | USM | IgM | PB  | SM  | IgM | 1   |
| 57414 | Gd+ | CSF | USM | IgM | PB  | USM | IgM | 2   |
| 57414 | Gd+ | CSF | USM | IgM | PB  | PC  | IgG | 1   |
| 57414 | Gd+ | PB  | DN  | IgG | PB  | DN  | IgM | 2   |
| 57414 | Gd+ | PB  | DN  | IgG | PB  | N   | IgM | 27  |
| 57414 | Gd+ | PB  | DN  | IgG | PB  | PC  | IgM | 1   |
| 57414 | Gd+ | PB  | DN  | IgG | PB  | USM | IgM | 19  |
| 57414 | Gd+ | PB  | DN  | IgG | PB  | PC  | IgG | 9   |
| 57414 | Gd+ | PB  | DN  | IgG | PB  | SM  | IgG | 58  |
| 57414 | Gd+ | PB  | DN  | IgM | PB  | N   | IgM | 26  |
| 57414 | Gd+ | PB  | DN  | IgM | PB  | SM  | IgM | 3   |



|       |     |     |    |     |     |     |     |     |     |
|-------|-----|-----|----|-----|-----|-----|-----|-----|-----|
| 57414 | Gd+ | PB  | DN | IgM | PB  | USM | IgM | 9   |     |
| 57414 | Gd+ | PB  | DN | IgM | PB  | SM  | IgG | 4   |     |
| 57414 | Gd+ | PB  | N  | IgM | PB  | PC  | IgM | 4   |     |
| 57414 | Gd+ | PB  | N  | IgM | PB  | SM  | IgM | 6   |     |
| 57414 | Gd+ | PB  | N  | IgM | PB  | USM | IgM | 103 |     |
| 57414 | Gd+ | PB  | N  | IgM | PB  | PC  | IgG | 6   |     |
| 57414 | Gd+ | PB  | N  | IgM | PB  | SM  | IgG | 41  |     |
| 57414 | Gd+ | PB  | PC | IgG | PB  | PC  | IgM | 7   |     |
| 57414 | Gd+ | PB  | PC | IgG | PB  | SM  | IgM | 6   |     |
| 57414 | Gd+ | PB  | PC | IgG | PB  | USM | IgM | 12  |     |
| 57414 | Gd+ | PB  | PC | IgG | PB  | SM  | IgG | 105 |     |
| 57414 | Gd+ | PB  | PC | IgM | PB  | SM  | IgM | 10  |     |
| 57414 | Gd+ | PB  | PC | IgM | PB  | USM | IgM | 20  |     |
| 57414 | Gd+ | PB  | PC | IgM | PB  | SM  | IgG | 7   |     |
| 57414 | Gd+ | PB  | SM | IgG | PB  | SM  | IgM | 20  |     |
| 57414 | Gd+ | PB  | SM | IgG | PB  | USM | IgM | 106 |     |
| 57414 | Gd+ | PB  | SM | IgM | PB  | USM | IgM | 65  |     |
| 57514 | Gd+ | CSF | DN | IgG | PB  | SM  | IgM | 1   |     |
| 57514 | Gd+ | CSF | DN | IgG | PB  | DN  | IgG | 1   |     |
| 57514 | Gd+ | CSF | DN | IgG | PB  | PC  | IgG | 1   |     |
| 57514 | Gd+ | CSF | DN | IgG | PB  | SM  | IgG | 5   |     |
| 57514 | Gd+ | CSF | DN | IgG | CSF | SM  | IgM | 1   | Yes |
| 57514 | Gd+ | CSF | DN | IgG | CSF | PC  | IgG | 5   |     |
| 57514 | Gd+ | CSF | DN | IgG | CSF | SM  | IgG | 1   |     |
| 57514 | Gd+ | CSF | N  | IgM | PB  | PC  | IgM | 2   |     |
| 57514 | Gd+ | CSF | N  | IgM | PB  | USM | IgM | 6   |     |
| 57514 | Gd+ | CSF | N  | IgM | PB  | PC  | IgG | 1   |     |
| 57514 | Gd+ | CSF | N  | IgM | PB  | N   | IgM | 4   |     |
| 57514 | Gd+ | CSF | PC | IgG | PB  | DN  | IgM | 2   |     |
| 57514 | Gd+ | CSF | PC | IgG | PB  | PC  | IgM | 4   |     |
| 57514 | Gd+ | CSF | PC | IgG | PB  | SM  | IgM | 2   |     |
| 57514 | Gd+ | CSF | PC | IgG | PB  | USM | IgM | 3   |     |
| 57514 | Gd+ | CSF | PC | IgG | PB  | DN  | IgG | 16  |     |
| 57514 | Gd+ | CSF | PC | IgG | PB  | PC  | IgG | 14  |     |
| 57514 | Gd+ | CSF | PC | IgG | PB  | SM  | IgG | 26  |     |
| 57514 | Gd+ | CSF | PC | IgG | CSF | SM  | IgM | 1   | Yes |
| 57514 | Gd+ | CSF | PC | IgG | CSF | SM  | IgG | 6   |     |
| 57514 | Gd+ | CSF | PC | IgG | PB  | N   | IgM | 2   |     |
| 57514 | Gd+ | CSF | SM | IgG | PB  | PC  | IgM | 1   |     |
| 57514 | Gd+ | CSF | SM | IgG | PB  | SM  | IgM | 2   |     |
| 57514 | Gd+ | CSF | SM | IgG | PB  | USM | IgM | 3   |     |
| 57514 | Gd+ | CSF | SM | IgG | PB  | DN  | IgG | 4   |     |

|       |     |     |     |     |     |     |     |     |     |
|-------|-----|-----|-----|-----|-----|-----|-----|-----|-----|
| 57514 | Gd+ | CSF | SM  | IgG | PB  | PC  | IgG | 8   |     |
| 57514 | Gd+ | CSF | SM  | IgG | CSF | SM  | IgM | 3   | Yes |
| 57514 | Gd+ | CSF | SM  | IgG | PB  | SM  | IgG | 22  |     |
| 57514 | Gd+ | CSF | SM  | IgM | PB  | SM  | IgM | 3   |     |
| 57514 | Gd+ | CSF | SM  | IgM | PB  | USM | IgM | 18  |     |
| 57514 | Gd+ | CSF | SM  | IgM | PB  | PC  | IgG | 1   |     |
| 57514 | Gd+ | CSF | SM  | IgM | PB  | SM  | IgG | 5   |     |
| 57514 | Gd+ | CSF | SM  | IgM | CSF | USM | IgM | 10  |     |
| 57514 | Gd+ | CSF | USM | IgM | PB  | N   | IgM | 1   |     |
| 57514 | Gd+ | CSF | USM | IgM | PB  | PC  | IgM | 1   |     |
| 57514 | Gd+ | CSF | USM | IgM | PB  | SM  | IgM | 7   |     |
| 57514 | Gd+ | CSF | USM | IgM | PB  | USM | IgM | 28  |     |
| 57514 | Gd+ | CSF | USM | IgM | PB  | DN  | IgG | 1   |     |
| 57514 | Gd+ | CSF | USM | IgM | PB  | SM  | IgG | 5   |     |
| 57514 | Gd+ | PB  | DN  | IgG | PB  | DN  | IgM | 36  |     |
| 57514 | Gd+ | PB  | DN  | IgG | PB  | N   | IgM | 28  |     |
| 57514 | Gd+ | PB  | DN  | IgG | PB  | PC  | IgM | 6   |     |
| 57514 | Gd+ | PB  | DN  | IgG | PB  | SM  | IgM | 9   |     |
| 57514 | Gd+ | PB  | DN  | IgG | PB  | USM | IgM | 29  |     |
| 57514 | Gd+ | PB  | DN  | IgG | PB  | PC  | IgG | 21  |     |
| 57514 | Gd+ | PB  | DN  | IgG | PB  | SM  | IgG | 102 |     |
| 57514 | Gd+ | PB  | DN  | IgM | PB  | N   | IgM | 22  |     |
| 57514 | Gd+ | PB  | DN  | IgM | PB  | SM  | IgM | 4   |     |
| 57514 | Gd+ | PB  | DN  | IgM | PB  | USM | IgM | 8   |     |
| 57514 | Gd+ | PB  | DN  | IgM | PB  | PC  | IgG | 2   |     |
| 57514 | Gd+ | PB  | DN  | IgM | PB  | SM  | IgG | 5   |     |
| 57514 | Gd+ | PB  | N   | IgM | PB  | PC  | IgM | 13  |     |
| 57514 | Gd+ | PB  | N   | IgM | PB  | SM  | IgM | 24  |     |
| 57514 | Gd+ | PB  | N   | IgM | PB  | USM | IgM | 245 |     |
| 57514 | Gd+ | PB  | N   | IgM | PB  | PC  | IgG | 8   |     |
| 57514 | Gd+ | PB  | N   | IgM | PB  | SM  | IgG | 69  |     |
| 57514 | Gd+ | PB  | PC  | IgG | PB  | PC  | IgM | 70  |     |
| 57514 | Gd+ | PB  | PC  | IgG | PB  | SM  | IgM | 12  |     |
| 57514 | Gd+ | PB  | PC  | IgG | PB  | USM | IgM | 29  |     |
| 57514 | Gd+ | PB  | PC  | IgG | PB  | SM  | IgG | 83  |     |
| 57514 | Gd+ | PB  | PC  | IgM | PB  | SM  | IgM | 13  |     |
| 57514 | Gd+ | PB  | PC  | IgM | PB  | USM | IgM | 35  |     |
| 57514 | Gd+ | PB  | PC  | IgM | PB  | SM  | IgG | 33  |     |
| 57514 | Gd+ | PB  | SM  | IgG | PB  | SM  | IgM | 165 |     |
| 57514 | Gd+ | PB  | SM  | IgG | PB  | USM | IgM | 277 |     |
| 57514 | Gd+ | PB  | SM  | IgM | PB  | USM | IgM | 163 |     |
| 57714 | Gd+ | CSF | DN  | IgG | PB  | SM  | IgM | 1   |     |

|       |     |     |     |     |     |     |     |     |
|-------|-----|-----|-----|-----|-----|-----|-----|-----|
| 57714 | Gd+ | CSF | DN  | IgG | PB  | DN  | IgG | 2   |
| 57714 | Gd+ | CSF | DN  | IgG | PB  | SM  | IgG | 1   |
| 57714 | Gd+ | CSF | N   | IgM | PB  | PC  | IgM | 2   |
| 57714 | Gd+ | CSF | N   | IgM | PB  | SM  | IgM | 1   |
| 57714 | Gd+ | CSF | N   | IgM | PB  | USM | IgM | 5   |
| 57714 | Gd+ | CSF | N   | IgM | PB  | DN  | IgG | 2   |
| 57714 | Gd+ | CSF | N   | IgM | PB  | PC  | IgG | 2   |
| 57714 | Gd+ | CSF | N   | IgM | PB  | SM  | IgG | 2   |
| 57714 | Gd+ | CSF | N   | IgM | CSF | USM | IgM | 2   |
| 57714 | Gd+ | CSF | N   | IgM | PB  | N   | IgM | 4   |
| 57714 | Gd+ | CSF | PC  | IgG | PB  | PC  | IgM | 1   |
| 57714 | Gd+ | CSF | PC  | IgG | PB  | PC  | IgG | 4   |
| 57714 | Gd+ | CSF | PC  | IgG | PB  | SM  | IgG | 3   |
| 57714 | Gd+ | CSF | PC  | IgG | CSF | SM  | IgG | 7   |
| 57714 | Gd+ | CSF | SM  | IgG | PB  | USM | IgM | 2   |
| 57714 | Gd+ | CSF | SM  | IgG | PB  | DN  | IgG | 3   |
| 57714 | Gd+ | CSF | SM  | IgG | PB  | PC  | IgG | 3   |
| 57714 | Gd+ | CSF | SM  | IgG | PB  | SM  | IgG | 7   |
| 57714 | Gd+ | CSF | USM | IgM | PB  | N   | IgM | 4   |
| 57714 | Gd+ | CSF | USM | IgM | PB  | PC  | IgM | 8   |
| 57714 | Gd+ | CSF | USM | IgM | PB  | SM  | IgM | 13  |
| 57714 | Gd+ | CSF | USM | IgM | PB  | USM | IgM | 29  |
| 57714 | Gd+ | CSF | USM | IgM | PB  | DN  | IgG | 1   |
| 57714 | Gd+ | CSF | USM | IgM | PB  | PC  | IgG | 1   |
| 57714 | Gd+ | CSF | USM | IgM | PB  | SM  | IgG | 7   |
| 57714 | Gd+ | PB  | DN  | IgG | PB  | DN  | IgM | 4   |
| 57714 | Gd+ | PB  | DN  | IgG | PB  | N   | IgM | 51  |
| 57714 | Gd+ | PB  | DN  | IgG | PB  | PC  | IgM | 3   |
| 57714 | Gd+ | PB  | DN  | IgG | PB  | SM  | IgM | 8   |
| 57714 | Gd+ | PB  | DN  | IgG | PB  | USM | IgM | 39  |
| 57714 | Gd+ | PB  | DN  | IgG | PB  | PC  | IgG | 21  |
| 57714 | Gd+ | PB  | DN  | IgG | PB  | SM  | IgG | 106 |
| 57714 | Gd+ | PB  | DN  | IgM | PB  | N   | IgM | 14  |
| 57714 | Gd+ | PB  | DN  | IgM | PB  | PC  | IgM | 3   |
| 57714 | Gd+ | PB  | DN  | IgM | PB  | SM  | IgM | 11  |
| 57714 | Gd+ | PB  | DN  | IgM | PB  | USM | IgM | 13  |
| 57714 | Gd+ | PB  | DN  | IgM | PB  | PC  | IgG | 3   |
| 57714 | Gd+ | PB  | DN  | IgM | PB  | SM  | IgG | 3   |
| 57714 | Gd+ | PB  | N   | IgM | PB  | PC  | IgM | 13  |
| 57714 | Gd+ | PB  | N   | IgM | PB  | SM  | IgM | 23  |
| 57714 | Gd+ | PB  | N   | IgM | PB  | USM | IgM | 145 |
| 57714 | Gd+ | PB  | N   | IgM | PB  | PC  | IgG | 8   |

|       |     |     |    |     |     |     |     |     |
|-------|-----|-----|----|-----|-----|-----|-----|-----|
| 57714 | Gd+ | PB  | N  | IgM | PB  | SM  | IgG | 42  |
| 57714 | Gd+ | PB  | PC | IgG | PB  | PC  | IgM | 128 |
| 57714 | Gd+ | PB  | PC | IgG | PB  | SM  | IgM | 36  |
| 57714 | Gd+ | PB  | PC | IgG | PB  | USM | IgM | 38  |
| 57714 | Gd+ | PB  | PC | IgG | PB  | SM  | IgG | 108 |
| 57714 | Gd+ | PB  | PC | IgM | PB  | SM  | IgM | 96  |
| 57714 | Gd+ | PB  | PC | IgM | PB  | USM | IgM | 128 |
| 57714 | Gd+ | PB  | PC | IgM | PB  | SM  | IgG | 31  |
| 57714 | Gd+ | PB  | SM | IgG | PB  | SM  | IgM | 99  |
| 57714 | Gd+ | PB  | SM | IgG | PB  | USM | IgM | 122 |
| 57714 | Gd+ | PB  | SM | IgM | PB  | USM | IgM | 196 |
| 64215 | Gd- | CSF | SM | IgG | PB  | DN  | IgG | 1   |
| 64215 | Gd- | CSF | SM | IgG | PB  | PC  | IgG | 1   |
| 64215 | Gd- | CSF | SM | IgM | CSF | USM | IgM | 1   |
| 64215 | Gd- | PB  | DN | IgG | PB  | DN  | IgM | 17  |
| 64215 | Gd- | PB  | DN | IgG | PB  | N   | IgM | 47  |
| 64215 | Gd- | PB  | DN | IgG | PB  | SM  | IgM | 1   |
| 64215 | Gd- | PB  | DN | IgG | PB  | USM | IgM | 23  |
| 64215 | Gd- | PB  | DN | IgG | PB  | PC  | IgG | 5   |
| 64215 | Gd- | PB  | DN | IgG | PB  | SM  | IgG | 110 |
| 64215 | Gd- | PB  | DN | IgM | PB  | N   | IgM | 29  |
| 64215 | Gd- | PB  | DN | IgM | PB  | PC  | IgM | 1   |
| 64215 | Gd- | PB  | DN | IgM | PB  | SM  | IgM | 13  |
| 64215 | Gd- | PB  | DN | IgM | PB  | USM | IgM | 32  |
| 64215 | Gd- | PB  | DN | IgM | PB  | SM  | IgG | 6   |
| 64215 | Gd- | PB  | N  | IgM | PB  | PC  | IgM | 2   |
| 64215 | Gd- | PB  | N  | IgM | PB  | SM  | IgM | 23  |
| 64215 | Gd- | PB  | N  | IgM | PB  | USM | IgM | 418 |
| 64215 | Gd- | PB  | N  | IgM | PB  | PC  | IgG | 4   |
| 64215 | Gd- | PB  | N  | IgM | PB  | SM  | IgG | 92  |
| 64215 | Gd- | PB  | PC | IgG | PB  | PC  | IgM | 15  |
| 64215 | Gd- | PB  | PC | IgG | PB  | SM  | IgM | 7   |
| 64215 | Gd- | PB  | PC | IgG | PB  | USM | IgM | 16  |
| 64215 | Gd- | PB  | PC | IgG | PB  | SM  | IgG | 107 |
| 64215 | Gd- | PB  | PC | IgM | PB  | SM  | IgM | 7   |
| 64215 | Gd- | PB  | PC | IgM | PB  | USM | IgM | 10  |
| 64215 | Gd- | PB  | PC | IgM | PB  | SM  | IgG | 7   |
| 64215 | Gd- | PB  | SM | IgG | PB  | SM  | IgM | 61  |
| 64215 | Gd- | PB  | SM | IgG | PB  | USM | IgM | 255 |
| 64215 | Gd- | PB  | SM | IgM | PB  | USM | IgM | 147 |



|       |    |                  |                  |          |                              |       |     |       |
|-------|----|------------------|------------------|----------|------------------------------|-------|-----|-------|
| 51814 | 3  | Connecting to PB | USM_146293_IGM   | IGHV2-5  | CAHRTYGFDDYW                 | IGHJ4 | PB  | 9     |
| 51814 | 3  | Connecting to PB | USM_146293_IGM   | IGHV2-5  | CAHRLYGAFDIW                 | IGHJ4 | PB  | 19    |
| 51814 | 3  | Connecting to PB | SM_200000_IGG    | IGHV2-5  | CAHRTGGGFDYW                 | IGHJ4 | PB  | 77    |
| 51814 | 4  | CSF exclusive    | CSF_37673_IGG    | IGHV3-7  | AKAGRYYDFWRLGDPKRHDYYSYGLDVM | IGHJ6 | CSF | 140   |
| 51814 | 5  | CSF exclusive    | CSF_37673_IGG    | IGHV3-43 | CAKAIHLWLPGYW                | IGHJ4 | CSF | 176   |
| 51814 | 6  | CSF exclusive    | CSF_37673_IGG    | IGHV3-30 | CAKAQGEYCSSTRCYDWWFFDLW      | IGHJ2 | CSF | 19    |
| 51814 | 7  | Connecting to PB | CSF_37673_IGG    | IGHV3-9  | CAKDIPETNMKRVIHYHNGLDVW      | IGHJ6 | CSF | 75    |
| 51814 | 7  | Connecting to PB | SM_200000_IGG    | IGHV3-9  | CTKDIPETNMKRVIHYHNGLDVW      | IGHJ6 | PB  | 1     |
| 51814 | 8  | CSF exclusive    | CSF_37673_IGG    | IGHV3-23 | CAKDLAGSQYINFWRPYYRYRMDVW    | IGHJ6 | CSF | 12    |
| 51814 | 8  | CSF exclusive    | CSF_37673_IGG    | IGHV3-23 | CAKDLAGSQYINFWRPYYRYGMDVW    | IGHJ6 | CSF | 36    |
| 51814 | 9  | CSF exclusive    | CSF_37673_IGG    | IGHV3-23 | CAKDLTLFQVVIISDWDYGMVW       | IGHJ6 | CSF | 144   |
| 51814 | 10 | Connecting to PB | CSF_37673_IGG    | IGHV3-23 | CAKDPKYSYDSDHYFDYW           | IGHJ4 | CSF | 87    |
| 51814 | 10 | Connecting to PB | SM_200000_IGG    | IGHV3-23 | CAKDPKYSYDSDHYFDYW           | IGHJ4 | PB  | 1     |
| 51814 | 11 | Connecting to PB | CSF_37673_IGG    | IGHV3-9  | CAKDTMYSSSSGSYFDSW           | IGHJ4 | CSF | 68    |
| 51814 | 11 | Connecting to PB | Naive_200000_IGM | IGHV3-9  | CAKDTMYSSSSGSYFDSW           | IGHJ4 | PB  | 1     |
| 51814 | 12 | Connecting to PB | CSF_37673_IGG    | IGHV1-18 | CAKNYYDYRGYPLDIDYW           | IGHJ4 | CSF | 1718  |
| 51814 | 12 | Connecting to PB | DN_43729_IGG     | IGHV1-18 | CAKNYYDYRGYPLDIDYW           | IGHJ4 | PB  | 1     |
| 51814 | 13 | CSF exclusive    | CSF_37673_IGG    | IGHV3-9  | CAKSLQGAAYANGLERDRYFGLDVM    | IGHJ6 | CSF | 101   |
| 51814 | 14 | Connecting to PB | CSF_37673_IGG    | IGHV4-34 | CAKYYSGEDFW                  | IGHJ4 | CSF | 22    |
| 51814 | 14 | Connecting to PB | DN_43729_IGG     | IGHV4-34 | CAKYYSGEDFW                  | IGHJ4 | PB  | 23    |
| 51814 | 14 | Connecting to PB | PC_7585_IGG      | IGHV4-34 | CAKYYSGEDYD                  | IGHJ4 | PB  | 72    |
| 51814 | 14 | Connecting to PB | SM_200000_IGG    | IGHV4-34 | CAKYYSGEDFW                  | IGHJ4 | PB  | 885   |
| 51814 | 15 | Connecting to PB | CSF_37673_IGG    | IGHV4-59 | CALRDNGYYPY                  | IGHJ4 | CSF | 447   |
| 51814 | 15 | Connecting to PB | SM_200000_IGG    | IGHV4-59 | CALRDNGYYPY                  | IGHJ4 | PB  | 48    |
| 51814 | 16 | Connecting to PB | CSF_37673_IGG    | IGHV1-8  | CARAAAAGWGLDYW               | IGHJ4 | CSF | 1     |
| 51814 | 16 | Connecting to PB | SM_200000_IGG    | IGHV1-8  | CARAAAAGWGLDYW               | IGHJ4 | PB  | 1     |
| 51814 | 17 | Connecting to PB | CSF_37673_IGG    | IGHV4-34 | CARAQRVDPDLSWGPKSYYSGMDVW    | IGHJ6 | CSF | 144   |
| 51814 | 17 | Connecting to PB | SM_200000_IGG    | IGHV4-34 | CARAQRVDPDLSWGPKSYYSGMDVW    | IGHJ6 | PB  | 2     |
| 51814 | 18 | CSF exclusive    | CSF_37673_IGG    | IGHV3-74 | CARDLAAVKTYFYNYGMDVW         | IGHJ6 | CSF | 33    |
| 51814 | 19 | CSF exclusive    | CSF_37673_IGG    | IGHV3-48 | CARDRKSIRVPYFSGNYDYAMDVW     | IGHJ6 | CSF | 72    |
| 51814 | 20 | CSF exclusive    | CSF_37673_IGG    | IGHV4-59 | CAREFFYYDDSGYRRYFDLW         | IGHJ2 | CSF | 206   |
| 51814 | 21 | CSF exclusive    | CSF_37673_IGG    | IGHV1-46 | CARELQLWFGMDVW               | IGHJ6 | CSF | 86    |
| 51814 | 22 | CSF exclusive    | CSF_37673_IGG    | IGHV4-28 | CARGAIGGAGPRVGYPPYQLDVM      | IGHJ6 | CSF | 471   |
| 51814 | 23 | CSF exclusive    | CSF_37673_IGG    | IGHV4-28 | CARGGDYGLPIDYW               | IGHJ4 | CSF | 499   |
| 51814 | 24 | Connecting to PB | CSF_37673_IGG    | IGHV4-34 | CARGGGMDVW                   | IGHJ6 | CSF | 88    |
| 51814 | 24 | Connecting to PB | Naive_200000_IGM | IGHV4-34 | CARRSYGMDVW                  | IGHJ6 | PB  | 1     |
| 51814 | 24 | Connecting to PB | USM_146293_IGM   | IGHV4-34 | CARVYGMVW                    | IGHJ6 | PB  | 2     |
| 51814 | 24 | Connecting to PB | USM_146293_IGM   | IGHV4-34 | CASGYGMVW                    | IGHJ6 | PB  | 2     |
| 51814 | 24 | Connecting to PB | Naive_200000_IGM | IGHV4-34 | CARPYGMVW                    | IGHJ6 | PB  | 4     |
| 51814 | 24 | Connecting to PB | USM_146293_IGM   | IGHV4-34 | CARWYGMVW                    | IGHJ6 | PB  | 4     |
| 51814 | 25 | Connecting to PB | CSF_37673_IGG    | IGHV4-59 | CARGGYCANGVCYSSSAFDLW        | IGHJ3 | CSF | 1     |
| 51814 | 25 | Connecting to PB | PC_7585_IGG      | IGHV4-59 | CARGGYCANGVCYSSSAFDLW        | IGHJ3 | PB  | 20    |
| 51814 | 26 | Connecting to PB | CSF_37673_IGG    | IGHV1-8  | CARGRVAAGPFDYW               | IGHJ4 | CSF | 1     |
| 51814 | 26 | Connecting to PB | DN_43729_IGM     | IGHV1-8  | CARGRVAAGPFDYW               | IGHJ4 | PB  | 3     |
| 51814 | 26 | Connecting to PB | DN_43729_IGG     | IGHV1-8  | CARGRVAAGPFDYW               | IGHJ4 | PB  | 2931  |
| 51814 | 27 | CSF exclusive    | CSF_37673_IGG    | IGHV1-18 | CARGRVAGNLVFDYW              | IGHJ4 | CSF | 2340  |
| 51814 | 28 | CSF exclusive    | CSF_37673_IGG    | IGHV3-13 | CARGSMVRGVIIPRVYGLDAW        | IGHJ6 | CSF | 1082  |
| 51814 | 29 | CSF exclusive    | CSF_37673_IGG    | IGHV1-69 | CARGSYHDSAWGRSRYTTEALAIW     | IGHJ3 | CSF | 722   |
| 51814 | 30 | CSF exclusive    | CSF_37673_IGG    | IGHV5-51 | CARHCSGISSAWCVNWPDPW         | IGHJ5 | CSF | 4     |
| 51814 | 30 | CSF exclusive    | CSF_37673_IGM    | IGHV5-51 | CARHCSGISSAWCVNWPDPW         | IGHJ5 | CSF | 164   |
| 51814 | 31 | CSF exclusive    | CSF_37673_IGG    | IGHV4-39 | CARHRCYCSSTSCYVWLDYW         | IGHJ4 | CSF | 306   |
| 51814 | 32 | Connecting to PB | CSF_37673_IGG    | IGHV4-59 | CARHYTVSRYFDYW               | IGHJ4 | CSF | 1742  |
| 51814 | 32 | Connecting to PB | SM_200000_IGG    | IGHV4-59 | CARHYTVSRYFDYW               | IGHJ4 | PB  | 4     |
| 51814 | 33 | Connecting to PB | CSF_37673_IGG    | IGHV4-59 | CARKASLNWFPDPW               | IGHJ5 | CSF | 15610 |
| 51814 | 33 | Connecting to PB | PC_7585_IGG      | IGHV4-59 | CARKASLNWFPDPW               | IGHJ5 | PB  | 1     |
| 51814 | 33 | Connecting to PB | SM_200000_IGG    | IGHV4-59 | CARKASLNWFPDPW               | IGHJ5 | PB  | 31    |
| 51814 | 34 | CSF exclusive    | CSF_37673_IGG    | IGHV3-74 | CARKPITLVRGGYGMVW            | IGHJ6 | CSF | 24    |
| 51814 | 35 | Connecting to PB | CSF_37673_IGG    | IGHV3-53 | CARNIDYGDYGRMDVW             | IGHJ6 | CSF | 3254  |
| 51814 | 35 | Connecting to PB | DN_43729_IGG     | IGHV3-53 | CARNIDYSDYGRMDVW             | IGHJ6 | PB  | 1     |
| 51814 | 35 | Connecting to PB | SM_200000_IGG    | IGHV3-53 | CARNIDYGDYGRMDVW             | IGHJ6 | PB  | 6     |
| 51814 | 35 | Connecting to PB | DN_43729_IGG     | IGHV3-53 | CARNIDYGDYGRMDVW             | IGHJ6 | PB  | 10    |
| 51814 | 36 | CSF exclusive    | CSF_37673_IGG    | IGHV4-31 | CARNNWKPGDTSDDGWRSPGNFDYW    | IGHJ4 | CSF | 59    |
| 51814 | 37 | Connecting to PB | CSF_37673_IGG    | IGHV1-3  | CARPAQLWSNSFDYW              | IGHJ4 | CSF | 1     |
| 51814 | 37 | Connecting to PB | DN_43729_IGG     | IGHV1-3  | CARPAQLWSNSFDYW              | IGHJ4 | PB  | 555   |
| 51814 | 38 | CSF exclusive    | CSF_37673_IGG    | IGHV3-23 | CARPVNPTYDFWLSLW             | IGHJ5 | CSF | 3     |
| 51814 | 39 | Connecting to PB | CSF_37673_IGG    | IGHV2-70 | CARTYSRSWNYDYD               | IGHJ4 | CSF | 1314  |
| 51814 | 39 | Connecting to PB | SM_200000_IGG    | IGHV2-70 | CAQYYSRSWNYDYD               | IGHJ4 | PB  | 1     |
| 51814 | 39 | Connecting to PB | SM_200000_IGG    | IGHV2-70 | CARTYSRSWNYFDYW              | IGHJ4 | PB  | 2     |
| 51814 | 39 | Connecting to PB | SM_200000_IGG    | IGHV2-70 | CARTYSRSWNYDYD               | IGHJ4 | PB  | 14    |
| 51814 | 40 | CSF exclusive    | CSF_37673_IGG    | IGHV1-2  | CARVQGAFEETSGLVGAWNSDLW      | IGHJ2 | CSF | 126   |
| 51814 | 41 | CSF exclusive    | CSF_37673_IGG    | IGHV3-74 | CARVRGSVKYGTVDVW             | IGHJ6 | CSF | 1     |
| 51814 | 41 | CSF exclusive    | CSF_37673_IGG    | IGHV3-74 | RARVRGSVKYGMVW               | IGHJ6 | CSF | 1     |
| 51814 | 41 | CSF exclusive    | CSF_37673_IGG    | IGHV3-74 | CARVRGSVKYGMVW               | IGHJ6 | CSF | 20    |
| 51814 | 42 | CSF exclusive    | CSF_37673_IGG    | IGHV4-34 | CATADRASLGYW                 | IGHJ4 | CSF | 1     |
| 51814 | 43 | CSF exclusive    | CSF_37673_IGG    | IGHV1-18 | CATDRLGSSSLDHW               | IGHJ4 | CSF | 195   |
| 51814 | 44 | Connecting to PB | CSF_37673_IGG    | IGHV2-5  | CATGSVDMVRGLFDYGMVW          | IGHJ6 | CSF | 1     |
| 51814 | 44 | Connecting to PB | DN_43729_IGG     | IGHV2-5  | CATGSVDMVRGLFDYGMVW          | IGHJ6 | PB  | 2931  |
| 51814 | 45 | CSF exclusive    | CSF_37673_IGG    | IGHV4-39 | CATHTNDFYRGWFDPW             | IGHJ5 | CSF | 33    |
| 51814 | 46 | CSF exclusive    | CSF_37673_IGG    | IGHV4-34 | CATQLYYGYYGLDVM              | IGHJ6 | CSF | 20    |
| 51814 | 47 | CSF exclusive    | CSF_37673_IGG    | IGHV4-31 | CATQRTTWTKRFPDPW             | IGHJ5 | CSF | 1     |
| 51814 | 47 | CSF exclusive    | CSF_37673_IGG    | IGHV4-31 | CATQRTTWTKRFPDPW             | IGHJ5 | CSF | 157   |
| 51814 | 48 | Connecting to PB | CSF_37673_IGG    | IGHV4-39 | CGRGGDYGLPIDYW               | IGHJ4 | CSF | 1     |
| 51814 | 48 | Connecting to PB | SM_200000_IGG    | IGHV4-39 | CARGGDYGLPIDYW               | IGHJ4 | PB  | 2     |
| 51814 | 49 | Connecting to PB | CSF_37673_IGG    | IGHV3-15 | CTAGLAARRPLW                 | IGHJ5 | CSF | 1     |
| 51814 | 49 | Connecting to PB | CSF_37673_IGG    | IGHV3-15 | RTAGLAARRLLW                 | IGHJ5 | CSF | 1     |

|       |    |                  |                |          |                             |       |     |       |
|-------|----|------------------|----------------|----------|-----------------------------|-------|-----|-------|
| 51814 | 49 | Connecting to PB | CSF_37673_IGG  | IGHV3-15 | CTAGLAARRLLW                | IGHJ5 | CSF | 26    |
| 51814 | 49 | Connecting to PB | CSF_37673_IGG  | IGHV3-15 | CTAGLAARKLLW                | IGHJ5 | CSF | 548   |
| 51814 | 49 | Connecting to PB | SM_200000_IGG  | IGHV3-15 | CTAGLAARKLLW                | IGHJ5 | PB  | 2     |
| 51814 | 49 | Connecting to PB | PC_7585_IGG    | IGHV3-15 | CTAGLAARKLLW                | IGHJ5 | PB  | 41    |
| 51814 | 50 | Connecting to PB | CSF_37673_IGG  | IGHV1-69 | CTRTWDSSGRGAFDIW            | IGHJ3 | CSF | 283   |
| 51814 | 50 | Connecting to PB | PC_7585_IGG    | IGHV1-69 | CTRTWDSSGRGAFDIW            | IGHJ3 | PB  | 7     |
| 51814 | 51 | CSF exclusive    | CSF_37673_IGG  | IGHV3-15 | CTTRQLPLPW                  | IGHJ5 | CSF | 2     |
| 51814 | 52 | CSF exclusive    | CSF_37673_IGG  | IGHV2-5  | RVHGVIGTYWDFDPW             | IGHJ5 | CSF | 1     |
| 51814 | 52 | CSF exclusive    | CSF_37673_IGG  | IGHV2-5  | CVHGGIGTYWDFDPW             | IGHJ5 | CSF | 2393  |
| 51814 | 53 | Connecting to PB | CSF_37673_IGG  | IGHV2-5  | CVKRGPIEDAFDLW              | IGHJ3 | CSF | 8516  |
| 51814 | 53 | Connecting to PB | PC_7585_IGG    | IGHV2-5  | CVKRGPIEDAFDLW              | IGHJ3 | PB  | 2     |
| 51814 | 53 | Connecting to PB | SM_200000_IGG  | IGHV2-5  | CVKRGPIEDAFDLW              | IGHJ3 | PB  | 60    |
| 51814 | 54 | CSF exclusive    | CSF_37673_IGG  | IGHV4-4  | RALRDNGGYYPYR               | IGHJ5 | CSF | 1     |
| 51814 | 55 | CSF exclusive    | CSF_37673_IGM  | IGHV3-15 | AVAGTDYW                    | IGHJ4 | CSF | 6     |
| 51814 | 56 | Connecting to PB | CSF_37673_IGM  | IGHV3-11 | CARESANFDYW                 | IGHJ4 | CSF | 7     |
| 51814 | 56 | Connecting to PB | USM_146293_IGM | IGHV3-11 | CARESANFDYW                 | IGHJ4 | PB  | 8     |
| 51814 | 57 | CSF exclusive    | CSF_37673_IGM  | IGHV1-8  | CARFGGSYYTMDVDYW            | IGHJ4 | CSF | 80    |
| 51814 | 58 | CSF exclusive    | CSF_37673_IGM  | IGHV4-59 | CARLFLPSLYDDYGATLDYW        | IGHJ4 | CSF | 2     |
| 51814 | 58 | CSF exclusive    | CSF_37673_IGM  | IGHV4-59 | CARLFLPSLYDDYGATLDYW        | IGHJ4 | CSF | 24    |
| 51814 | 59 | CSF exclusive    | CSF_37673_IGM  | IGHV5-51 | CARPVSCSGGSCISCSGGSCYSGLDWW | IGHJ6 | CSF | 20    |
| 51814 | 60 | CSF exclusive    | CSF_37673_IGM  | IGHV3-53 | CMGYDVNW                    | IGHJ4 | CSF | 7     |
| 56414 | 1  | CSF exclusive    | CSF-DN_289_IGG | IGHV4-39 | CAAVLHDYDTGGYTFW            | IGHJ4 | CSF | 58    |
| 56414 | 2  | CSF exclusive    | CSF-DN_289_IGG | IGHV3-23 | CAKDLAAPQDW                 | IGHJ4 | CSF | 19    |
| 56414 | 3  | Connecting to PB | CSF-DN_289_IGG | IGHV3-30 | CAKEFRHSSPYYYNYMDVW         | IGHJ6 | CSF | 47    |
| 56414 | 3  | Connecting to PB | DN_61743_IGG   | IGHV3-30 | CAKEFRHSSPYYYNYMDVW         | IGHJ6 | PB  | 1     |
| 56414 | 3  | Connecting to PB | SM_200000_IGG  | IGHV3-30 | CAKEFRYSSPYYYNYMDVW         | IGHJ6 | PB  | 3     |
| 56414 | 4  | CSF exclusive    | CSF-DN_289_IGG | IGHV3-23 | CAKVQHLGIDYW                | IGHJ4 | CSF | 37    |
| 56414 | 5  | CSF exclusive    | CSF-DN_289_IGG | IGHV4-39 | CALIVTTSGDWYFDLW            | IGHJ2 | CSF | 149   |
| 56414 | 6  | Connecting to PB | CSF-DN_289_IGG | IGHV1-3  | CARALFSGLGEPRGMAFDIW        | IGHJ3 | CSF | 1     |
| 56414 | 6  | Connecting to PB | SM_200000_IGG  | IGHV1-3  | CARALFSGLGEPRGMAFDIW        | IGHJ3 | PB  | 2     |
| 56414 | 6  | Connecting to PB | SM_200000_IGG  | IGHV1-3  | CARALFSGLGEPRGMAFDIW        | IGHJ3 | PB  | 4     |
| 56414 | 6  | Connecting to PB | PC_2081_IGG    | IGHV1-3  | CARALFSGLGEPRGMAFDIW        | IGHJ3 | PB  | 11048 |
| 56414 | 7  | CSF exclusive    | CSF-DN_289_IGG | IGHV1-18 | CARDGGERGWDFDPW             | IGHJ5 | CSF | 1     |
| 56414 | 8  | Connecting to PB | CSF-SM_796_IGG | IGHV1-2  | CARDHVFYDSSGPPVSATLRYW      | IGHJ4 | CSF | 1     |
| 56414 | 8  | Connecting to PB | CSF-DN_289_IGG | IGHV1-2  | CARDHVFYDTSGPPVSATLRYW      | IGHJ4 | CSF | 21    |
| 56414 | 8  | Connecting to PB | CSF-DN_289_IGG | IGHV1-2  | CARDHVFYDSSGPPVSATLRFW      | IGHJ4 | CSF | 33    |
| 56414 | 8  | Connecting to PB | CSF-SM_796_IGG | IGHV1-2  | CARDHVFYDSSGPPVSATLRYW      | IGHJ4 | CSF | 92    |
| 56414 | 8  | Connecting to PB | CSF-SM_796_IGG | IGHV1-2  | CARDHAFYDSSGPPVSASLRYW      | IGHJ4 | CSF | 188   |
| 56414 | 8  | Connecting to PB | CSF-SM_796_IGG | IGHV1-2  | CARDHAFYDSSGPPVSASLRYW      | IGHJ4 | CSF | 252   |
| 56414 | 8  | Connecting to PB | CSF-DN_289_IGG | IGHV1-2  | CARDHVFYDSSGPPVSATLRYW      | IGHJ4 | CSF | 746   |
| 56414 | 8  | Connecting to PB | SM_200000_IGG  | IGHV1-2  | CARDHVFYDSSGPPVSATSRYW      | IGHJ4 | PB  | 3     |
| 56414 | 8  | Connecting to PB | DN_61743_IGG   | IGHV1-2  | CARDHIFYDSSGPPVSATLRYW      | IGHJ4 | PB  | 9     |
| 56414 | 8  | Connecting to PB | SM_200000_IGG  | IGHV1-2  | CARDHAFYDSSGPPVSASLRYW      | IGHJ4 | PB  | 22    |
| 56414 | 8  | Connecting to PB | DN_61743_IGG   | IGHV1-2  | CARDHVFYESSGPPVSATLTYW      | IGHJ4 | PB  | 26    |
| 56414 | 8  | Connecting to PB | SM_200000_IGG  | IGHV1-2  | CARDHVFYESSGPPVSATLTYW      | IGHJ4 | PB  | 31    |
| 56414 | 8  | Connecting to PB | SM_200000_IGG  | IGHV1-2  | CARDHVFYDSSGPPVSATLRYW      | IGHJ4 | PB  | 35    |
| 56414 | 8  | Connecting to PB | DN_61743_IGG   | IGHV1-2  | CARDHVFYDSSGPPVSATLSYW      | IGHJ4 | PB  | 42    |
| 56414 | 8  | Connecting to PB | DN_61743_IGG   | IGHV1-2  | CARDHAFYDSSGPPVSATLRYW      | IGHJ4 | PB  | 136   |
| 56414 | 8  | Connecting to PB | DN_61743_IGG   | IGHV1-2  | CARDHVFYDSSGPPVSATLRYW      | IGHJ4 | PB  | 259   |
| 56414 | 9  | CSF exclusive    | CSF-DN_289_IGG | IGHV4-39 | CARDLTTGLYFESW              | IGHJ4 | CSF | 121   |
| 56414 | 10 | CSF exclusive    | CSF-DN_289_IGG | IGHV3-48 | CARDRGHDYLEVLNHFDPW         | IGHJ4 | CSF | 4     |
| 56414 | 11 | CSF exclusive    | CSF-DN_289_IGG | IGHV3-7  | CAREGDYSHYWSRRNIKYYMDVW     | IGHJ6 | CSF | 238   |
| 56414 | 12 | CSF exclusive    | CSF-DN_289_IGG | IGHV4-28 | CAREGNYDSSGHMDVW            | IGHJ6 | CSF | 36    |
| 56414 | 13 | Connecting to PB | CSF-SM_796_IGG | IGHV4-59 | CARENRSYGLAFDRW             | IGHJ4 | CSF | 1     |
| 56414 | 13 | Connecting to PB | CSF-SM_796_IGG | IGHV4-59 | CARENRSYGHAFDHW             | IGHJ4 | CSF | 710   |
| 56414 | 13 | Connecting to PB | CSF-DN_289_IGG | IGHV4-59 | CARENRSYGHAFDHW             | IGHJ4 | CSF | 826   |
| 56414 | 13 | Connecting to PB | SM_200000_IGG  | IGHV4-59 | RARENRSYGHAFDHW             | IGHJ4 | PB  | 1     |
| 56414 | 13 | Connecting to PB | DN_61743_IGG   | IGHV4-59 | CARENRSYGHAFDHW             | IGHJ4 | PB  | 3     |
| 56414 | 13 | Connecting to PB | SM_200000_IGG  | IGHV4-59 | CARENRSYGHAFDHW             | IGHJ4 | PB  | 8     |
| 56414 | 14 | CSF exclusive    | CSF-DN_289_IGG | IGHV3-30 | CARGGTSRRGAMDVW             | IGHJ6 | CSF | 89    |
| 56414 | 15 | Connecting to PB | CSF-DN_289_IGG | IGHV3-21 | CARGVFGNNRWDADFIDW          | IGHJ3 | CSF | 41    |
| 56414 | 15 | Connecting to PB | SM_200000_IGG  | IGHV3-21 | CARGVFGNNRWDADFIDW          | IGHJ3 | PB  | 1     |
| 56414 | 15 | Connecting to PB | DN_61743_IGG   | IGHV3-21 | CARGVFGNNRWDADFIDW          | IGHJ3 | PB  | 10    |
| 56414 | 16 | Connecting to PB | CSF-DN_289_IGG | IGHV4-59 | CARHSGSPRRFDYW              | IGHJ4 | CSF | 223   |
| 56414 | 16 | Connecting to PB | CSF-SM_796_IGG | IGHV4-59 | CARHSGSPRRFDYW              | IGHJ4 | CSF | 656   |
| 56414 | 16 | Connecting to PB | DN_61743_IGG   | IGHV4-59 | CARHSGSPRRFDYW              | IGHJ4 | PB  | 314   |
| 56414 | 16 | Connecting to PB | SM_200000_IGG  | IGHV4-59 | CARHSGSPRRFDYW              | IGHJ4 | PB  | 381   |
| 56414 | 17 | Connecting to PB | CSF-DN_289_IGG | IGHV4-34 | CARILNIVDTARIDFW            | IGHJ4 | CSF | 1     |
| 56414 | 17 | Connecting to PB | CSF-SM_796_IGG | IGHV4-34 | CARILNIVGSAHIDFW            | IGHJ4 | CSF | 33    |
| 56414 | 17 | Connecting to PB | CSF-SM_796_IGG | IGHV4-34 | CARILNKVGAHIDFW             | IGHJ4 | CSF | 37    |
| 56414 | 17 | Connecting to PB | CSF-SM_796_IGG | IGHV4-34 | CGRILNIVGSAHIDFW            | IGHJ4 | CSF | 208   |
| 56414 | 17 | Connecting to PB | CSF-DN_289_IGG | IGHV4-34 | CARILNIVGTAHIDFW            | IGHJ4 | CSF | 385   |
| 56414 | 17 | Connecting to PB | CSF-DN_289_IGG | IGHV4-34 | CGRILNIVGSAHIDFW            | IGHJ4 | CSF | 1531  |
| 56414 | 17 | Connecting to PB | DN_61743_IGG   | IGHV4-34 | CGRILNIVGSAHIDFW            | IGHJ4 | PB  | 1     |
| 56414 | 17 | Connecting to PB | SM_200000_IGM  | IGHV4-34 | CGRILNIVGSAHIDFW            | IGHJ4 | PB  | 1     |
| 56414 | 17 | Connecting to PB | SM_200000_IGG  | IGHV4-34 | CGRILNIMDSAHIDFW            | IGHJ4 | PB  | 2     |
| 56414 | 17 | Connecting to PB | DN_61743_IGG   | IGHV4-34 | CARILNIVGTAHIDFW            | IGHJ4 | PB  | 3     |
| 56414 | 17 | Connecting to PB | DN_61743_IGG   | IGHV4-34 | CATILNKVGAHIDFW             | IGHJ4 | PB  | 5     |
| 56414 | 17 | Connecting to PB | DN_61743_IGG   | IGHV4-34 | CGRILNIVGSAHIDFW            | IGHJ4 | PB  | 8     |
| 56414 | 17 | Connecting to PB | SM_200000_IGG  | IGHV4-34 | CGRILNIVGSAHIDFW            | IGHJ4 | PB  | 11    |
| 56414 | 18 | CSF exclusive    | CSF-DN_289_IGG | IGHV2-26 | CARIRSGYDFWSGYAYYYGMDVW     | IGHJ6 | CSF | 267   |
| 56414 | 19 | CSF exclusive    | CSF-DN_289_IGG | IGHV3-7  | CARIYRDFDHTGFFFLDYW         | IGHJ4 | CSF | 119   |
| 56414 | 20 | Connecting to PB | CSF-DN_289_IGG | IGHV2-26 | CARMRYISSWYQELGYDYW         | IGHJ4 | CSF | 1     |
| 56414 | 20 | Connecting to PB | DN_61743_IGG   | IGHV2-26 | CTRMRYISSWYQELGYDYW         | IGHJ4 | PB  | 1     |
| 56414 | 20 | Connecting to PB | SM_200000_IGG  | IGHV2-26 | RARMRYISSWYQELGYDYW         | IGHJ4 | PB  | 1     |

|       |    |                  |                  |          |                       |       |     |      |
|-------|----|------------------|------------------|----------|-----------------------|-------|-----|------|
| 56414 | 20 | Connecting to PB | SM_200000_IGG    | IGHV2-26 | CARMRYISGWQELGHDIYW   | IGHJ4 | PB  | 2    |
| 56414 | 20 | Connecting to PB | SM_200000_IGG    | IGHV2-26 | CARMRYISSWQELDYDIYW   | IGHJ4 | PB  | 2    |
| 56414 | 20 | Connecting to PB | SM_200000_IGM    | IGHV2-26 | CARMRYISSWQELGYDIYW   | IGHJ4 | PB  | 9    |
| 56414 | 20 | Connecting to PB | SM_200000_IGG    | IGHV2-26 | CARMRYISSWQELGYDIYW   | IGHJ4 | PB  | 320  |
| 56414 | 21 | CSF exclusive    | CSF-DN_289_IGG   | IGHV5-51 | CARNLGHCTASASCHDGLDIW | IGHJ3 | CSF | 11   |
| 56414 | 22 | Connecting to PB | CSF-DN_289_IGG   | IGHV5-51 | CARNLGYCTASARCHDAFDIW | IGHJ3 | CSF | 3496 |
| 56414 | 22 | Connecting to PB | SM_200000_IGG    | IGHV5-51 | CARNPRYCTASCHDAFDIW   | IGHJ3 | PB  | 1    |
| 56414 | 22 | Connecting to PB | DN_61743_IGG     | IGHV5-51 | CARNLGYCTSTSCHDAFDIW  | IGHJ3 | PB  | 4    |
| 56414 | 22 | Connecting to PB | SM_200000_IGG    | IGHV5-51 | CARNPGYCTASCHDAFDIW   | IGHJ3 | PB  | 10   |
| 56414 | 22 | Connecting to PB | SM_200000_IGG    | IGHV5-51 | CARNLGYCPSASCHDAFDIW  | IGHJ3 | PB  | 13   |
| 56414 | 22 | Connecting to PB | DN_61743_IGG     | IGHV5-51 | CARNLGYCTSGSCHDAFDIW  | IGHJ3 | PB  | 18   |
| 56414 | 22 | Connecting to PB | SM_200000_IGG    | IGHV5-51 | CARNLGFCTASCHDAFDIW   | IGHJ3 | PB  | 20   |
| 56414 | 22 | Connecting to PB | SM_200000_IGG    | IGHV5-51 | CARNLGYCTASCHDAFDIW   | IGHJ3 | PB  | 32   |
| 56414 | 22 | Connecting to PB | DN_61743_IGG     | IGHV5-51 | CARNLGYCTASCHDAFDIW   | IGHJ3 | PB  | 39   |
| 56414 | 22 | Connecting to PB | DN_61743_IGG     | IGHV5-51 | CARNPGYCTASCHDAFDIW   | IGHJ3 | PB  | 47   |
| 56414 | 22 | Connecting to PB | DN_61743_IGG     | IGHV5-51 | CGRNLGYCTASCHDAFDIW   | IGHJ3 | PB  | 47   |
| 56414 | 22 | Connecting to PB | DN_61743_IGG     | IGHV5-51 | CARNLGYCTASCHDAFDIW   | IGHJ3 | PB  | 95   |
| 56414 | 22 | Connecting to PB | SM_200000_IGG    | IGHV5-51 | CARNLGYCTASCHDAFDIW   | IGHJ3 | PB  | 129  |
| 56414 | 22 | Connecting to PB | DN_61743_IGG     | IGHV5-51 | CARNLGYCTASCHDAFDIW   | IGHJ3 | PB  | 402  |
| 56414 | 23 | Connecting to PB | CSF-DN_289_IGG   | IGHV2-70 | CARSQSNWGLRVFDYW      | IGHJ4 | CSF | 53   |
| 56414 | 23 | Connecting to PB | SM_200000_IGG    | IGHV2-70 | CARSQSNWGLRVFDYW      | IGHJ4 | PB  | 11   |
| 56414 | 23 | Connecting to PB | DN_61743_IGG     | IGHV2-70 | CARSQSNWGLRVFDYW      | IGHJ4 | PB  | 102  |
| 56414 | 24 | Connecting to PB | CSF-DN_289_IGG   | IGHV5-51 | CARTGPQWLSLR          | IGHJ4 | CSF | 1    |
| 56414 | 24 | Connecting to PB | CSF-DN_289_IGG   | IGHV5-51 | CARTGPQWLFLW          | IGHJ4 | CSF | 68   |
| 56414 | 24 | Connecting to PB | DN_61743_IGG     | IGHV5-51 | CARTGPQWLFLW          | IGHJ4 | PB  | 1    |
| 56414 | 25 | CSF exclusive    | CSF-DN_289_IGG   | IGHV4-59 | CARTYGDYAWFDPW        | IGHJ5 | CSF | 397  |
| 56414 | 26 | Connecting to PB | CSF-SM_796_IGG   | IGHV3-48 | CARVGHDKRYFDYW        | IGHJ4 | CSF | 1    |
| 56414 | 26 | Connecting to PB | CSF-DN_289_IGG   | IGHV3-48 | CARVGDDYKRYFDYW       | IGHJ4 | CSF | 107  |
| 56414 | 26 | Connecting to PB | CSF-SM_796_IGG   | IGHV3-48 | CARVGNDYKRYFDYW       | IGHJ4 | CSF | 219  |
| 56414 | 26 | Connecting to PB | CSF-SM_796_IGG   | IGHV3-48 | CARVGDDYKRYFDYW       | IGHJ4 | CSF | 301  |
| 56414 | 26 | Connecting to PB | PC_2081_IGG      | IGHV3-48 | CARVGDDYKRYFDYW       | IGHJ4 | PB  | 8    |
| 56414 | 26 | Connecting to PB | SM_200000_IGG    | IGHV3-48 | CARVGDDYKRYFDYW       | IGHJ4 | PB  | 137  |
| 56414 | 27 | CSF exclusive    | CSF-DN_289_IGG   | IGHV4-55 | CARVKMDSFDIW          | IGHJ3 | CSF | 202  |
| 56414 | 28 | CSF exclusive    | CSF-DN_289_IGG   | IGHV4-59 | CARVLSGADAFDIW        | IGHJ3 | CSF | 251  |
| 56414 | 29 | CSF exclusive    | CSF-DN_289_IGG   | IGHV1-18 | CARVPIVGSYYYGMDVW     | IGHJ6 | CSF | 15   |
| 56414 | 30 | Connecting to PB | CSF-DN_289_IGG   | IGHV1-69 | CASDARQDYYYYYMDVW     | IGHJ6 | CSF | 1    |
| 56414 | 30 | Connecting to PB | DN_61743_IGG     | IGHV1-69 | CASDARQDYYYYYMDVW     | IGHJ6 | PB  | 127  |
| 56414 | 31 | Connecting to PB | CSF-DN_289_IGG   | IGHV3-30 | CASSKWLHYALEYW        | IGHJ4 | CSF | 48   |
| 56414 | 31 | Connecting to PB | SM_200000_IGG    | IGHV3-30 | CASSKWLHYALVYW        | IGHJ4 | PB  | 2    |
| 56414 | 31 | Connecting to PB | SM_200000_IGG    | IGHV3-30 | CASSKWLHYALEYW        | IGHJ4 | PB  | 3    |
| 56414 | 31 | Connecting to PB | SM_200000_IGG    | IGHV3-30 | CASSKWLHYALKYW        | IGHJ4 | PB  | 10   |
| 56414 | 32 | CSF exclusive    | CSF-DN_289_IGG   | IGHV3-43 | CASIRGGRRPLDYLW       | IGHJ4 | CSF | 1    |
| 56414 | 32 | CSF exclusive    | CSF-DN_289_IGG   | IGHV3-43 | CASIRGGRQPLDYLW       | IGHJ4 | CSF | 18   |
| 56414 | 33 | CSF exclusive    | CSF-DN_289_IGG   | IGHV1-2  | CAVGLASDGLHIW         | IGHJ3 | CSF | 2    |
| 56414 | 34 | CSF exclusive    | CSF-DN_289_IGG   | IGHV1-69 | CAVGPPYYDSSGYVDVW     | IGHJ5 | CSF | 13   |
| 56414 | 35 | CSF exclusive    | CSF-DN_289_IGG   | IGHV1-69 | CAVGPPYYDSSGYVDVW     | IGHJ4 | CSF | 234  |
| 56414 | 36 | Connecting to PB | CSF-DN_289_IGG   | IGHV3-23 | CTRWMPSYDGMVW         | IGHJ6 | CSF | 12   |
| 56414 | 36 | Connecting to PB | CSF-SM_796_IGG   | IGHV3-23 | CTKWMPSYDGMVW         | IGHJ6 | CSF | 361  |
| 56414 | 36 | Connecting to PB | SM_200000_IGG    | IGHV3-23 | CTKWMASDGMVW          | IGHJ6 | PB  | 25   |
| 56414 | 36 | Connecting to PB | SM_200000_IGG    | IGHV3-23 | CTKWMPSYDGMVW         | IGHJ6 | PB  | 113  |
| 56414 | 36 | Connecting to PB | DN_61743_IGG     | IGHV3-23 | CTKWMPSYDGMVW         | IGHJ6 | PB  | 196  |
| 56414 | 37 | CSF exclusive    | CSF-DN_289_IGG   | IGHV3-23 | CVKDMTHDYYYGRDVW      | IGHJ6 | CSF | 27   |
| 56414 | 38 | CSF exclusive    | CSF-DN_289_IGG   | IGHV3-23 | CVKGSPTVTPFSW         | IGHJ5 | CSF | 28   |
| 56414 | 39 | CSF exclusive    | CSF-DN_289_IGG   | IGHV4-28 | CVRDNAGDYEFW          | IGHJ4 | CSF | 13   |
| 56414 | 40 | CSF exclusive    | CSF-N_223_IGM    | IGHV1-58 | CAAAATRGYDLEYW        | IGHJ4 | CSF | 167  |
| 56414 | 41 | CSF exclusive    | CSF-N_223_IGM    | IGHV1-46 | CAAGIAAEQAIDYW        | IGHJ4 | CSF | 166  |
| 56414 | 42 | Connecting to PB | CSF-N_223_IGM    | IGHV1-3  | CAAPGWQLTDW           | IGHJ4 | CSF | 887  |
| 56414 | 42 | Connecting to PB | Naive_200000_IGM | IGHV1-3  | CAAPGWQLTDW           | IGHJ4 | PB  | 16   |
| 56414 | 43 | Connecting to PB | CSF-N_223_IGM    | IGHV6-1  | CAGSGSYMWNW           | IGHJ4 | CSF | 1    |
| 56414 | 43 | Connecting to PB | USM_87637_IGM    | IGHV6-1  | CAGSGSYMWNW           | IGHJ4 | PB  | 202  |
| 56414 | 44 | CSF exclusive    | CSF-N_223_IGM    | IGHV2-5  | CVHEYDILTGTTEYLHHW    | IGHJ1 | CSF | 2    |
| 56414 | 44 | CSF exclusive    | CSF-N_223_IGM    | IGHV2-5  | CAHEYDILTGTTEYFHHW    | IGHJ1 | CSF | 1242 |
| 56414 | 45 | CSF exclusive    | CSF-N_223_IGM    | IGHV2-5  | CAHRPRVGDTEGIFHFDYW   | IGHJ4 | CSF | 14   |
| 56414 | 46 | Connecting to PB | CSF-N_223_IGM    | IGHV2-5  | CAHRPWGLRTPGYW        | IGHJ4 | CSF | 18   |
| 56414 | 46 | Connecting to PB | CSF-N_223_IGM    | IGHV2-5  | CAHRPWGLRTPDYR        | IGHJ4 | CSF | 76   |
| 56414 | 46 | Connecting to PB | CSF-N_223_IGM    | IGHV2-5  | CAHRPWGLRTPDYR        | IGHJ4 | CSF | 175  |
| 56414 | 46 | Connecting to PB | Naive_200000_IGM | IGHV2-5  | CAHRPWGLRTPDYR        | IGHJ4 | PB  | 1    |
| 56414 | 47 | CSF exclusive    | CSF-N_223_IGM    | IGHV2-5  | CAHRRGAVAGTEPFDPW     | IGHJ4 | CSF | 48   |
| 56414 | 48 | Connecting to PB | CSF-N_223_IGM    | IGHV2-5  | CAHSGLDYYYYMDVW       | IGHJ6 | CSF | 1742 |
| 56414 | 48 | Connecting to PB | SM_200000_IGM    | IGHV2-5  | CAHSGLDYYYYMDVW       | IGHJ6 | PB  | 4    |
| 56414 | 49 | Connecting to PB | CSF-N_223_IGM    | IGHV3-23 | CAKAGPAGELRSWFPDW     | IGHJ5 | CSF | 72   |
| 56414 | 49 | Connecting to PB | DN_61743_IGG     | IGHV3-23 | CAKAGPAGELRSWFPDW     | IGHJ5 | PB  | 1    |
| 56414 | 50 | CSF exclusive    | CSF-N_223_IGM    | IGHV3-43 | CAKATYSGGLSSW         | IGHJ5 | CSF | 46   |
| 56414 | 51 | CSF exclusive    | CSF-N_223_IGM    | IGHV3-23 | CAKAVGIAAAGPYFDYW     | IGHJ4 | CSF | 1    |
| 56414 | 52 | CSF exclusive    | CSF-N_223_IGM    | IGHV3-23 | CAKCTMVRGIVISW        | IGHJ4 | CSF | 117  |
| 56414 | 53 | CSF exclusive    | CSF-N_223_IGM    | IGHV3-23 | CAKDIAVAGTFDHW        | IGHJ4 | CSF | 26   |
| 56414 | 54 | CSF exclusive    | CSF-N_223_IGM    | IGHV3-23 | CAKDQWELEAFDIW        | IGHJ3 | CSF | 27   |
| 56414 | 55 | Connecting to PB | CSF-N_223_IGM    | IGHV3-23 | CAKDRRTGDDW           | IGHJ4 | CSF | 1    |
| 56414 | 55 | Connecting to PB | PC_2081_IGM      | IGHV3-23 | CAKDRRTGDDW           | IGHJ4 | PB  | 2    |
| 56414 | 55 | Connecting to PB | PC_2081_IGG      | IGHV3-23 | CAKDRRTGDDW           | IGHJ4 | PB  | 601  |
| 56414 | 56 | CSF exclusive    | CSF-N_223_IGM    | IGHV3-23 | CAKDRVGQWPTILFDYW     | IGHJ4 | CSF | 79   |
| 56414 | 57 | CSF exclusive    | CSF-N_223_IGM    | IGHV3-23 | CAKDWYDYYGSGCIDYW     | IGHJ4 | CSF | 143  |
| 56414 | 58 | CSF exclusive    | CSF-N_223_IGM    | IGHV3-23 | CAKGRPGIAAAGTRNAPDIW  | IGHJ3 | CSF | 29   |
| 56414 | 59 | CSF exclusive    | CSF-N_223_IGM    | IGHV3-23 | CAKGSSSWYSRYFDYW      | IGHJ4 | CSF | 38   |
| 56414 | 60 | CSF exclusive    | CSF-N_223_IGM    | IGHV3-23 | CAKLTIVKGGGWFPDW      | IGHJ5 | CSF | 18   |



|       |     |                  |                  |          |                         |       |     |      |
|-------|-----|------------------|------------------|----------|-------------------------|-------|-----|------|
| 56414 | 61  | CSF exclusive    | CSF-N_223_IGM    | IGHV3-23 | CAKPTGVKYFDYW           | IGHJ4 | CSF | 55   |
| 56414 | 62  | CSF exclusive    | CSF-N_223_IGM    | IGHV3-23 | CAKRAPGYSSGWYTYW        | IGHJ4 | CSF | 51   |
| 56414 | 63  | CSF exclusive    | CSF-N_223_IGM    | IGHV3-23 | CAKSLGVKEWYFDLW         | IGHJ2 | CSF | 72   |
| 56414 | 64  | Connecting to PB | CSF-N_223_IGM    | IGHV3-23 | CAKVREYYDDSSGSVDYW      | IGHJ4 | CSF | 84   |
| 56414 | 64  | Connecting to PB | Naive_200000_IGM | IGHV3-23 | CAKVREYYDDSSGSVGYR      | IGHJ4 | PB  | 1    |
| 56414 | 65  | CSF exclusive    | CSF-N_223_IGM    | IGHV4-39 | CARAGVGGPMDYW           | IGHJ4 | CSF | 184  |
| 56414 | 66  | CSF exclusive    | CSF-N_223_IGM    | IGHV4-55 | CARAGWSWFDPW            | IGHJ5 | CSF | 237  |
| 56414 | 67  | CSF exclusive    | CSF-N_223_IGM    | IGHV4-34 | CARASGGFPELNFDYW        | IGHJ4 | CSF | 57   |
| 56414 | 68  | CSF exclusive    | CSF-N_223_IGM    | IGHV3-30 | CARAVIGSGVAIDYW         | IGHJ4 | CSF | 1    |
| 56414 | 69  | CSF exclusive    | CSF-N_223_IGM    | IGHV4-55 | CARAVITAMVTSWFDPW       | IGHJ5 | CSF | 1    |
| 56414 | 70  | CSF exclusive    | CSF-N_223_IGM    | IGHV4-31 | CARDSSGYPPSHYFDYW       | IGHJ4 | CSF | 86   |
| 56414 | 71  | Connecting to PB | CSF-N_223_IGM    | IGHV1-18 | CARDYDSSGRLDYW          | IGHJ4 | CSF | 1    |
| 56414 | 71  | Connecting to PB | USM_87637_IGM    | IGHV1-18 | CARDYDSSGNFDYW          | IGHJ4 | PB  | 1    |
| 56414 | 71  | Connecting to PB | USM_87637_IGM    | IGHV1-18 | CARDYDSSGDFDYW          | IGHJ4 | PB  | 3    |
| 56414 | 71  | Connecting to PB | USM_87637_IGM    | IGHV1-18 | CARGDYDSSGSLDYW         | IGHJ4 | PB  | 4    |
| 56414 | 71  | Connecting to PB | USM_87637_IGM    | IGHV1-18 | CARGDYDSSGTLDYW         | IGHJ4 | PB  | 9    |
| 56414 | 71  | Connecting to PB | USM_87637_IGM    | IGHV1-18 | CARDYDSSGSLDYW          | IGHJ4 | PB  | 14   |
| 56414 | 71  | Connecting to PB | USM_87637_IGM    | IGHV1-18 | CARSYDSSGTLDYW          | IGHJ4 | PB  | 20   |
| 56414 | 71  | Connecting to PB | USM_87637_IGM    | IGHV1-18 | CARDYDSSGQLDYW          | IGHJ4 | PB  | 41   |
| 56414 | 71  | Connecting to PB | USM_87637_IGM    | IGHV1-18 | CARDYDSSGRLDYW          | IGHJ4 | PB  | 246  |
| 56414 | 72  | CSF exclusive    | CSF-N_223_IGM    | IGHV3-30 | CARDEGTVAITISYFDYW      | IGHJ4 | CSF | 8    |
| 56414 | 73  | CSF exclusive    | CSF-N_223_IGM    | IGHV3-21 | CARDETAAGKGSYDYW        | IGHJ4 | CSF | 30   |
| 56414 | 74  | Connecting to PB | CSF-N_223_IGM    | IGHV1-69 | CARDHGGWYNGYGMVDW       | IGHJ6 | CSF | 1    |
| 56414 | 74  | Connecting to PB | Naive_200000_IGM | IGHV1-69 | CARDHGGWYNGYGMVDW       | IGHJ6 | PB  | 1    |
| 56414 | 75  | CSF exclusive    | CSF-N_223_IGM    | IGHV4-28 | CARDPDSGWPVVYFQHW       | IGHJ1 | CSF | 146  |
| 56414 | 76  | CSF exclusive    | CSF-N_223_IGM    | IGHV1-18 | CARDPLDMVEGWSYYYGMDVW   | IGHJ6 | CSF | 1    |
| 56414 | 76  | CSF exclusive    | CSF-N_223_IGM    | IGHV1-18 | CARDPLDMVQGSYYYGMDVW    | IGHJ6 | CSF | 2    |
| 56414 | 77  | CSF exclusive    | CSF-N_223_IGM    | IGHV4-39 | CARDPRVLGAPFDYW         | IGHJ4 | CSF | 1    |
| 56414 | 78  | CSF exclusive    | CSF-N_223_IGM    | IGHV1-46 | CARDPTGLDYW             | IGHJ4 | CSF | 89   |
| 56414 | 79  | CSF exclusive    | CSF-N_223_IGM    | IGHV1-18 | CARDRWGERPDAFGDYW       | IGHJ4 | CSF | 39   |
| 56414 | 80  | Connecting to PB | CSF-N_223_IGM    | IGHV7-81 | CARDTPDSGSSGWYSW        | IGHJ4 | CSF | 2    |
| 56414 | 80  | Connecting to PB | SM_200000_IGM    | IGHV7-81 | CARDTPDSGSSGWYSW        | IGHJ4 | PB  | 221  |
| 56414 | 80  | Connecting to PB | USM_87637_IGM    | IGHV7-81 | CARDTPDSGSSGWYSW        | IGHJ4 | PB  | 307  |
| 56414 | 81  | CSF exclusive    | CSF-N_223_IGM    | IGHV3-48 | CARDWATQRPDCW           | IGHJ4 | CSF | 2    |
| 56414 | 81  | CSF exclusive    | CSF-N_223_IGM    | IGHV3-48 | CARDWATQRPDYW           | IGHJ4 | CSF | 34   |
| 56414 | 82  | Connecting to PB | CSF-N_223_IGM    | IGHV1-69 | CAREATMIVRLFDYW         | IGHJ4 | CSF | 1272 |
| 56414 | 82  | Connecting to PB | Naive_200000_IGM | IGHV1-69 | CAREATMIVRLFDYW         | IGHJ4 | PB  | 1    |
| 56414 | 82  | Connecting to PB | SM_200000_IGM    | IGHV1-69 | CAREATMIVRLFDYW         | IGHJ4 | PB  | 2    |
| 56414 | 83  | CSF exclusive    | CSF-N_223_IGM    | IGHV3-66 | CAREFRVYSGSYLVVYW       | IGHJ4 | CSF | 1    |
| 56414 | 84  | CSF exclusive    | CSF-N_223_IGM    | IGHV4-59 | CAREGAGWELRGTDYW        | IGHJ4 | CSF | 380  |
| 56414 | 85  | CSF exclusive    | CSF-N_223_IGM    | IGHV3-74 | CAREGTMIVVAGWFDPW       | IGHJ5 | CSF | 25   |
| 56414 | 86  | CSF exclusive    | CSF-N_223_IGM    | IGHV3-21 | CARELHVYSGSYLVVYW       | IGHJ4 | CSF | 75   |
| 56414 | 87  | CSF exclusive    | CSF-N_223_IGM    | IGHV3-66 | CAREQLGSLVWGFDPW        | IGHJ5 | CSF | 69   |
| 56414 | 88  | CSF exclusive    | CSF-N_223_IGM    | IGHV4-59 | CAREYSSGWYSHFDYW        | IGHJ4 | CSF | 70   |
| 56414 | 89  | Connecting to PB | CSF-N_223_IGM    | IGHV1-2  | CARGDPITIFGVVIONYWFYDLW | IGHJ2 | CSF | 881  |
| 56414 | 89  | Connecting to PB | Naive_200000_IGM | IGHV1-2  | CARGDPITIFGVVIONYWFYDLW | IGHJ2 | PB  | 5    |
| 56414 | 90  | CSF exclusive    | CSF-N_223_IGM    | IGHV4-39 | CARGDYGSGRPTGWFDPW      | IGHJ5 | CSF | 144  |
| 56414 | 91  | CSF exclusive    | CSF-N_223_IGM    | IGHV3-11 | CARGGRDLNDAFDI W        | IGHJ3 | CSF | 27   |
| 56414 | 92  | CSF exclusive    | CSF-N_223_IGM    | IGHV4-34 | CARGHSYSSSSPYDYW        | IGHJ4 | CSF | 662  |
| 56414 | 93  | CSF exclusive    | CSF-N_223_IGM    | IGHV3-66 | CARGHYDSSGYFTPCYYW      | IGHJ4 | CSF | 70   |
| 56414 | 94  | Connecting to PB | CSF-N_223_IGM    | IGHV1-3  | CARGLGAPDYW             | IGHJ4 | CSF | 144  |
| 56414 | 94  | Connecting to PB | Naive_200000_IGM | IGHV1-3  | CARGQLFDYW              | IGHJ4 | PB  | 4    |
| 56414 | 95  | Connecting to PB | CSF-N_223_IGM    | IGHV4-34 | CARGLSSYWFDPW           | IGHJ5 | CSF | 379  |
| 56414 | 95  | Connecting to PB | SM_200000_IGM    | IGHV4-34 | CARGLSSYWFDPW           | IGHJ5 | PB  | 3    |
| 56414 | 96  | Connecting to PB | CSF-N_223_IGM    | IGHV4-34 | CARGRQNDYW              | IGHJ4 | CSF | 1    |
| 56414 | 96  | Connecting to PB | Naive_200000_IGM | IGHV4-34 | CARGGTVDYW              | IGHJ4 | PB  | 1    |
| 56414 | 96  | Connecting to PB | SM_200000_IGM    | IGHV4-34 | CARGVVPDYW              | IGHJ4 | PB  | 2    |
| 56414 | 96  | Connecting to PB | Naive_200000_IGM | IGHV4-34 | CARLRYPDYW              | IGHJ4 | PB  | 2    |
| 56414 | 96  | Connecting to PB | Naive_200000_IGM | IGHV4-34 | CARGRTIDYW              | IGHJ4 | PB  | 3    |
| 56414 | 96  | Connecting to PB | Naive_200000_IGM | IGHV4-34 | CARGRLPDYW              | IGHJ4 | PB  | 5    |
| 56414 | 96  | Connecting to PB | SM_200000_IGM    | IGHV4-34 | CARGRQNDYW              | IGHJ4 | PB  | 13   |
| 56414 | 96  | Connecting to PB | DN_61743_IGG     | IGHV4-34 | CARGGTNDYW              | IGHJ4 | PB  | 46   |
| 56414 | 97  | CSF exclusive    | CSF-N_223_IGM    | IGHV1-69 | CARGSPAGICSGGSCYGYFDYW  | IGHJ4 | CSF | 176  |
| 56414 | 98  | CSF exclusive    | CSF-N_223_IGM    | IGHV5-51 | CARHGYSAGWGNWFDPW       | IGHJ5 | CSF | 77   |
| 56414 | 99  | CSF exclusive    | CSF-N_223_IGM    | IGHV4-59 | CARHIAAGSSRNWFDPW       | IGHJ5 | CSF | 273  |
| 56414 | 100 | CSF exclusive    | CSF-N_223_IGM    | IGHV4-39 | CARHIPDYDSSGSPGYW       | IGHJ4 | CSF | 1    |
| 56414 | 100 | CSF exclusive    | CSF-N_223_IGM    | IGHV4-39 | CARHIPDYDSSGSPDYW       | IGHJ4 | CSF | 265  |
| 56414 | 101 | CSF exclusive    | CSF-N_223_IGM    | IGHV4-39 | CARHRLGSSWYGVSYFDYW     | IGHJ4 | CSF | 74   |
| 56414 | 102 | Connecting to PB | CSF-N_223_IGM    | IGHV4-59 | CARHRYTGYEGADAFDIW      | IGHJ3 | CSF | 1    |
| 56414 | 102 | Connecting to PB | SM_200000_IGM    | IGHV4-59 | CARHRYTGYEGADAFDIW      | IGHJ3 | PB  | 4    |
| 56414 | 102 | Connecting to PB | PC_2081_IGG      | IGHV4-59 | CARHRYTGYEGADAFDIW      | IGHJ3 | PB  | 21   |
| 56414 | 102 | Connecting to PB | SM_200000_IGM    | IGHV4-59 | CARHRYTGYEGADAFDIW      | IGHJ3 | PB  | 521  |
| 56414 | 102 | Connecting to PB | PC_2081_IGM      | IGHV4-59 | CARHRYTGYEGADAFDIW      | IGHJ3 | PB  | 1918 |
| 56414 | 103 | CSF exclusive    | CSF-N_223_IGM    | IGHV2-26 | CARILWELLSLENWFDPW      | IGHJ5 | CSF | 19   |
| 56414 | 104 | CSF exclusive    | CSF-N_223_IGM    | IGHV2-26 | CARIRDYNGNPEYFDYW       | IGHJ4 | CSF | 161  |
| 56414 | 105 | CSF exclusive    | CSF-N_223_IGM    | IGHV5-51 | CARISYDYGDDPGAGAFDIW    | IGHJ3 | CSF | 3    |
| 56414 | 106 | Connecting to PB | CSF-N_223_IGM    | IGHV4-59 | CARKRVGSGYDDAFDIR       | IGHJ3 | CSF | 1    |
| 56414 | 106 | Connecting to PB | CSF-N_223_IGM    | IGHV4-59 | CARKRVDGSDYDDAFDIW      | IGHJ3 | CSF | 542  |
| 56414 | 106 | Connecting to PB | SM_200000_IGM    | IGHV4-59 | CARKRVDGSDYDDAFDIW      | IGHJ3 | PB  | 1    |
| 56414 | 107 | Connecting to PB | CSF-N_223_IGM    | IGHV5-51 | CARLETSAIAVDW           | IGHJ4 | CSF | 1052 |
| 56414 | 107 | Connecting to PB | USM_87637_IGM    | IGHV5-51 | CARLETSAIAVDW           | IGHJ4 | PB  | 1    |
| 56414 | 107 | Connecting to PB | Naive_200000_IGM | IGHV5-51 | CARLETSAIAVDW           | IGHJ4 | PB  | 2    |
| 56414 | 108 | CSF exclusive    | CSF-N_223_IGM    | IGHV4-59 | CARLSPVGGYGYGMVDW       | IGHJ6 | CSF | 3    |
| 56414 | 109 | Connecting to PB | CSF-N_223_IGM    | IGHV4-59 | CARLSPVGGYGYGMVDW       | IGHJ6 | CSF | 329  |
| 56414 | 109 | Connecting to PB | Naive_200000_IGM | IGHV4-59 | CARLSPVGGYGYGMVDW       | IGHJ6 | PB  | 1    |

|       |     |                  |                  |          |                         |       |     |      |
|-------|-----|------------------|------------------|----------|-------------------------|-------|-----|------|
| 56414 | 110 | CSF exclusive    | CSF-N_223_IGM    | IGHV4-59 | CARLVPGLLFGGSIDYW       | IGHJ4 | CSF | 9    |
| 56414 | 111 | CSF exclusive    | CSF-N_223_IGM    | IGHV2-26 | CARMSYGCYIFDYMDVW       | IGHJ6 | CSF | 8    |
| 56414 | 112 | CSF exclusive    | CSF-N_223_IGM    | IGHV1-3  | CARMVLGRDWFYDLW         | IGHJ2 | CSF | 1774 |
| 56414 | 113 | CSF exclusive    | CSF-N_223_IGM    | IGHV1-3  | CARPGIAAAGVSSSAGYFQHW   | IGHJ1 | CSF | 285  |
| 56414 | 114 | CSF exclusive    | CSF-N_223_IGM    | IGHV4-39 | CARQVGEQWLVLRAFDIW      | IGHJ3 | CSF | 451  |
| 56414 | 115 | Connecting to PB | CSF-N_223_IGM    | IGHV4-39 | CARQYGYDARGGDYW         | IGHJ4 | CSF | 1    |
| 56414 | 115 | Connecting to PB | USM_87637_IGM    | IGHV4-39 | CARQYGYDARGGDYW         | IGHJ4 | PB  | 10   |
| 56414 | 116 | CSF exclusive    | CSF-N_223_IGM    | IGHV5-51 | CARQKQWLDYFDYW          | IGHJ4 | CSF | 81   |
| 56414 | 117 | CSF exclusive    | CSF-N_223_IGM    | IGHV5-51 | CARRRGSYSYDDYW          | IGHJ4 | CSF | 9    |
| 56414 | 118 | CSF exclusive    | CSF-N_223_IGM    | IGHV4-31 | CARSHPGDRTSLDYW         | IGHJ4 | CSF | 17   |
| 56414 | 119 | CSF exclusive    | CSF-N_223_IGM    | IGHV1-69 | CARSPSLTVDLYYFDYW       | IGHJ4 | CSF | 324  |
| 56414 | 120 | CSF exclusive    | CSF-N_223_IGM    | IGHV4-59 | CARSVGPAAGTGYYYMDVW     | IGHJ6 | CSF | 17   |
| 56414 | 121 | CSF exclusive    | CSF-N_223_IGM    | IGHV4-59 | CARSVGPAAGTGYYYMDVW     | IGHJ6 | CSF | 243  |
| 56414 | 122 | CSF exclusive    | CSF-N_223_IGM    | IGHV4-59 | CARSVGPAAGTGYYYMDVW     | IGHJ6 | CSF | 6    |
| 56414 | 123 | CSF exclusive    | CSF-N_223_IGM    | IGHV2-70 | CARTDTKDRSAYRHDTFDWW    | IGHJ3 | CSF | 235  |
| 56414 | 124 | Connecting to PB | CSF-N_223_IGM    | IGHV6-1  | CARTPYTFYWFYDLW         | IGHJ2 | CSF | 1    |
| 56414 | 124 | Connecting to PB | DN_61743_IGG     | IGHV6-1  | CAGTPYTFYWFYDLW         | IGHJ2 | PB  | 1    |
| 56414 | 124 | Connecting to PB | Naive_200000_IGM | IGHV6-1  | CARTPYTFYWFYDLW         | IGHJ2 | PB  | 1    |
| 56414 | 124 | Connecting to PB | DN_61743_IGM     | IGHV6-1  | CARTPYTLLWYFDFW         | IGHJ2 | PB  | 1    |
| 56414 | 124 | Connecting to PB | SM_200000_IGM    | IGHV6-1  | CARTPYTFYWFYDLW         | IGHJ2 | PB  | 2    |
| 56414 | 124 | Connecting to PB | DN_61743_IGG     | IGHV6-1  | CARTPYTFYWFYDLW         | IGHJ2 | PB  | 10   |
| 56414 | 124 | Connecting to PB | DN_61743_IGM     | IGHV6-1  | CARTPYTFYWFYDLW         | IGHJ2 | PB  | 2283 |
| 56414 | 125 | CSF exclusive    | CSF-N_223_IGM    | IGHV4-59 | CARVDSSGWYDPW           | IGHJ5 | CSF | 376  |
| 56414 | 126 | CSF exclusive    | CSF-N_223_IGM    | IGHV3-48 | CARVEGHDAFDIW           | IGHJ3 | CSF | 58   |
| 56414 | 127 | Connecting to PB | CSF-N_223_IGM    | IGHV5-51 | CARVEIAVAGWVYW          | IGHJ4 | CSF | 354  |
| 56414 | 127 | Connecting to PB | USM_87637_IGM    | IGHV5-51 | CARVPIAVAGTVYW          | IGHJ4 | PB  | 14   |
| 56414 | 128 | CSF exclusive    | CSF-N_223_IGM    | IGHV1-3  | CARVGYFTTDYRDDAFDIW     | IGHJ3 | CSF | 8    |
| 56414 | 129 | CSF exclusive    | CSF-N_223_IGM    | IGHV1-18 | CARWDWSGYTAAYNWFDPW     | IGHJ5 | CSF | 182  |
| 56414 | 130 | CSF exclusive    | CSF-N_223_IGM    | IGHV3-53 | CARWGYDSSGYWGLDYW       | IGHJ4 | CSF | 147  |
| 56414 | 131 | CSF exclusive    | CSF-N_223_IGM    | IGHV1-18 | CARYGAVAGSLDSW          | IGHJ4 | CSF | 460  |
| 56414 | 132 | Connecting to PB | CSF-N_223_IGM    | IGHV1-3  | CASGEHDYGDYGMVW         | IGHJ6 | CSF | 1213 |
| 56414 | 132 | Connecting to PB | Naive_200000_IGM | IGHV1-3  | CASGEHDYGDYGMVW         | IGHJ6 | PB  | 1    |
| 56414 | 133 | CSF exclusive    | CSF-N_223_IGM    | IGHV3-30 | CASSGWSLFYGMVW          | IGHJ6 | CSF | 22   |
| 56414 | 134 | CSF exclusive    | CSF-N_223_IGM    | IGHV3-30 | CASSLSLVDSGYDAFDIW      | IGHJ3 | CSF | 32   |
| 56414 | 135 | CSF exclusive    | CSF-N_223_IGM    | IGHV1-24 | CATEVIPDYVLYW           | IGHJ4 | CSF | 31   |
| 56414 | 136 | CSF exclusive    | CSF-N_223_IGM    | IGHV3-66 | CATPHYDFWSSGYSGGRDYGMVW | IGHJ6 | CSF | 40   |
| 56414 | 137 | CSF exclusive    | CSF-N_223_IGM    | IGHV5-51 | CATQTENIDAFNVGEYFQYW    | IGHJ1 | CSF | 139  |
| 56414 | 138 | CSF exclusive    | CSF-N_223_IGM    | IGHV3-21 | CATTVVTPAEAFDIW         | IGHJ3 | CSF | 85   |
| 56414 | 139 | CSF exclusive    | CSF-N_223_IGM    | IGHV4-28 | CICIAAAGTSGSEYFQHW      | IGHJ1 | CSF | 272  |
| 56414 | 140 | CSF exclusive    | CSF-N_223_IGM    | IGHV4-55 | CICIAAAGTSGSGYFQHW      | IGHJ1 | CSF | 18   |
| 56414 | 141 | CSF exclusive    | CSF-N_223_IGM    | IGHV4-59 | CTRGAWLLITDYGGIDVW      | IGHJ6 | CSF | 343  |
| 56414 | 142 | CSF exclusive    | CSF-N_223_IGM    | IGHV3-15 | CTDSDWSPTVVTGAAGYW      | IGHJ4 | CSF | 15   |
| 56414 | 143 | CSF exclusive    | CSF-N_223_IGM    | IGHV3-15 | CTTRFWSGYPWAGYGGMDVW    | IGHJ6 | CSF | 10   |
| 56414 | 144 | CSF exclusive    | CSF-N_223_IGM    | IGHV3-64 | CVKSSGPAAPDYGGMDVW      | IGHJ6 | CSF | 3    |
| 56414 | 145 | CSF exclusive    | CSF-N_223_IGM    | IGHV3-30 | CVDRRHYGDFLLGLLW        | IGHJ4 | CSF | 19   |
| 56414 | 146 | Connecting to PB | CSF-SM_796_IGG   | IGHV5-51 | CAAGQGYSSSWHYFDSW       | IGHJ4 | CSF | 1    |
| 56414 | 146 | Connecting to PB | DN_61743_IGG     | IGHV5-51 | CAAGQGYSSSWHYFDSW       | IGHJ4 | PB  | 21   |
| 56414 | 147 | Connecting to PB | CSF-SM_796_IGG   | IGHV1-3  | CAAI VGATSW             | IGHJ4 | CSF | 1    |
| 56414 | 147 | Connecting to PB | Naive_200000_IGM | IGHV1-3  | CAAI VGATNW             | IGHJ4 | PB  | 1    |
| 56414 | 147 | Connecting to PB | Naive_200000_IGM | IGHV1-3  | CAAI VGATSW             | IGHJ4 | PB  | 14   |
| 56414 | 148 | CSF exclusive    | CSF-SM_796_IGG   | IGHV3-30 | CAEDGHDYCDYLIGLAYFDYW   | IGHJ4 | CSF | 1    |
| 56414 | 148 | CSF exclusive    | CSF-SM_796_IGG   | IGHV3-30 | CAKDGHDYGDYLIGLAYTDYW   | IGHJ4 | CSF | 1    |
| 56414 | 148 | CSF exclusive    | CSF-SM_796_IGG   | IGHV3-30 | CAKDGHDYGDYLIGLAYFDYW   | IGHJ4 | CSF | 105  |
| 56414 | 149 | Connecting to PB | CSF-SM_796_IGG   | IGHV4-59 | CAGGRTHCTGGVCLWYGGVDVW  | IGHJ6 | CSF | 4    |
| 56414 | 149 | Connecting to PB | SM_200000_IGG    | IGHV4-59 | CAGGRTYCTSGVCLHYYHGVDVW | IGHJ6 | PB  | 1    |
| 56414 | 149 | Connecting to PB | SM_200000_IGG    | IGHV4-59 | CAGGWYCTSGVCLHYYHGVDVW  | IGHJ6 | PB  | 1    |
| 56414 | 149 | Connecting to PB | SM_200000_IGG    | IGHV4-59 | CAGGRTYCTGGVCLWYGGVDVW  | IGHJ6 | PB  | 2    |
| 56414 | 149 | Connecting to PB | SM_200000_IGG    | IGHV4-59 | CAGARTYCTGGVCLDYGGVDVW  | IGHJ6 | PB  | 7    |
| 56414 | 149 | Connecting to PB | SM_200000_IGG    | IGHV4-59 | CAGGRTYCTGGVCLWYGGVDVW  | IGHJ6 | PB  | 8    |
| 56414 | 149 | Connecting to PB | SM_200000_IGG    | IGHV4-59 | CAGGRTYCTSGVCLHYYHGVDVW | IGHJ6 | PB  | 12   |
| 56414 | 149 | Connecting to PB | SM_200000_IGG    | IGHV4-59 | CAGGRTHCTGGVCLWYGGVDVW  | IGHJ6 | PB  | 14   |
| 56414 | 149 | Connecting to PB | SM_200000_IGG    | IGHV4-59 | CAGGRTYCTGGVCLWYGGVDVW  | IGHJ6 | PB  | 21   |
| 56414 | 149 | Connecting to PB | SM_200000_IGG    | IGHV4-59 | CAGGRTYCSGGVCLWYGGVDVW  | IGHJ6 | PB  | 32   |
| 56414 | 150 | Connecting to PB | CSF-SM_796_IGG   | IGHV3-23 | CAKDQPYGTGWYGCSAHW      | IGHJ4 | CSF | 1    |
| 56414 | 150 | Connecting to PB | SM_200000_IGG    | IGHV3-23 | CTKDQPYGTGWYGC SVHW     | IGHJ4 | PB  | 1    |
| 56414 | 150 | Connecting to PB | SM_200000_IGG    | IGHV3-23 | CARDQPYGTGWYGC SAFW     | IGHJ4 | PB  | 6    |
| 56414 | 151 | Connecting to PB | CSF-SM_796_IGG   | IGHV3-23 | CAKVGSWFGDYGGMDVW       | IGHJ6 | CSF | 20   |
| 56414 | 151 | Connecting to PB | SM_200000_IGG    | IGHV3-23 | CAKVGSWFGDYGGMDVW       | IGHJ6 | PB  | 15   |
| 56414 | 152 | Connecting to PB | CSF-SM_796_IGG   | IGHV4-31 | CARANIAARSVDYW          | IGHJ4 | CSF | 16   |
| 56414 | 152 | Connecting to PB | PC_2081_IGG      | IGHV4-31 | CARANIAARSVDYW          | IGHJ4 | PB  | 1    |
| 56414 | 152 | Connecting to PB | SM_200000_IGG    | IGHV4-31 | CARANIAARSM DYW         | IGHJ4 | PB  | 4    |
| 56414 | 152 | Connecting to PB | SM_200000_IGG    | IGHV4-31 | CARANVAARSM DYW         | IGHJ4 | PB  | 7    |
| 56414 | 152 | Connecting to PB | SM_200000_IGG    | IGHV4-31 | C'FRANIAARSMDFW         | IGHJ4 | PB  | 35   |
| 56414 | 153 | CSF exclusive    | CSF-SM_796_IGG   | IGHV4-59 | CARARQQLDRW             | IGHJ5 | CSF | 7    |
| 56414 | 154 | Connecting to PB | CSF-SM_796_IGM   | IGHV4-31 | CARDLPPSGANAFDIW        | IGHJ3 | CSF | 2    |
| 56414 | 154 | Connecting to PB | CSF-SM_796_IGG   | IGHV4-31 | CARDLPPSGANAFDIW        | IGHJ3 | CSF | 3377 |
| 56414 | 154 | Connecting to PB | SM_200000_IGG    | IGHV4-31 | CARDLPPSGANAFDFW        | IGHJ3 | PB  | 25   |
| 56414 | 154 | Connecting to PB | DN_61743_IGG     | IGHV4-31 | CARDLPPSGANAFDFW        | IGHJ3 | PB  | 30   |
| 56414 | 154 | Connecting to PB | DN_61743_IGG     | IGHV4-31 | CARDLPPSSANAFDIW        | IGHJ3 | PB  | 71   |
| 56414 | 154 | Connecting to PB | DN_61743_IGG     | IGHV4-31 | CARDLPPSGANAFDIW        | IGHJ3 | PB  | 129  |
| 56414 | 154 | Connecting to PB | SM_200000_IGG    | IGHV4-31 | CARDLPPSGANAFDIW        | IGHJ3 | PB  | 187  |
| 56414 | 155 | Connecting to PB | CSF-SM_796_IGG   | IGHV3-74 | CAREALDLWSGYTSHYYYYIDVW | IGHJ6 | CSF | 5    |
| 56414 | 155 | Connecting to PB | SM_200000_IGG    | IGHV3-74 | CAREALDLWSGYTSHYYYYIDVW | IGHJ6 | PB  | 4    |
| 56414 | 156 | Connecting to PB | CSF-SM_796_IGG   | IGHV4-59 | CARENRSWYGNAFDIW        | IGHJ4 | CSF | 566  |
| 56414 | 156 | Connecting to PB | DN_61743_IGG     | IGHV4-59 | CARENRSWYGNAFDIW        | IGHJ4 | PB  | 10   |

|       |     |                  |                |          |                            |       |     |       |
|-------|-----|------------------|----------------|----------|----------------------------|-------|-----|-------|
| 56414 | 157 | CSF exclusive    | CSF-SM_796_IGG | IGHV4-59 | CARENRSYGHAFDPW            | IGHJ2 | CSF | 2     |
| 56414 | 158 | Connecting to PB | CSF-SM_796_IGG | IGHV3-30 | CARERCSGGDCYADLW           | IGHJ5 | CSF | 3     |
| 56414 | 158 | Connecting to PB | SM_200000_IGG  | IGHV3-30 | CARERCSGGDCYADLW           | IGHJ5 | PB  | 9     |
| 56414 | 159 | Connecting to PB | CSF-SM_796_IGG | IGHV4-59 | CAREYSSFDYW                | IGHJ4 | CSF | 13    |
| 56414 | 159 | Connecting to PB | SM_200000_IGM  | IGHV4-59 | CAREYSSSDYW                | IGHJ4 | PB  | 1     |
| 56414 | 159 | Connecting to PB | SM_200000_IGG  | IGHV4-59 | CAREYSSFDYW                | IGHJ4 | PB  | 27    |
| 56414 | 159 | Connecting to PB | SM_200000_IGG  | IGHV4-59 | CAREYSSSDYW                | IGHJ4 | PB  | 43    |
| 56414 | 160 | Connecting to PB | CSF-SM_796_IGG | IGHV6-1  | CARGFHNAFDIW               | IGHJ3 | CSF | 1     |
| 56414 | 160 | Connecting to PB | CSF-SM_796_IGM | IGHV6-1  | CARGRSSAFDIW               | IGHJ3 | CSF | 314   |
| 56414 | 160 | Connecting to PB | SM_200000_IGM  | IGHV6-1  | CARGQWTAFDIW               | IGHJ3 | PB  | 1     |
| 56414 | 160 | Connecting to PB | SM_200000_IGG  | IGHV6-1  | CARGRDSAFDVW               | IGHJ3 | PB  | 2     |
| 56414 | 160 | Connecting to PB | SM_200000_IGG  | IGHV6-1  | CARVIHSGFDIW               | IGHJ3 | PB  | 2     |
| 56414 | 160 | Connecting to PB | SM_200000_IGM  | IGHV6-1  | CVRGQWTAFDIW               | IGHJ3 | PB  | 2     |
| 56414 | 160 | Connecting to PB | SM_200000_IGG  | IGHV6-1  | CAGGARSAFDIW               | IGHJ3 | PB  | 3     |
| 56414 | 160 | Connecting to PB | SM_200000_IGG  | IGHV6-1  | CVRGQHSADFIDW              | IGHJ3 | PB  | 8     |
| 56414 | 160 | Connecting to PB | PC_2081_IGM    | IGHV6-1  | CARGFHNAFDIW               | IGHJ3 | PB  | 20    |
| 56414 | 160 | Connecting to PB | SM_200000_IGG  | IGHV6-1  | CAGGTRSAFDIW               | IGHJ3 | PB  | 35    |
| 56414 | 160 | Connecting to PB | SM_200000_IGG  | IGHV6-1  | CARGSMSAFDIW               | IGHJ3 | PB  | 35    |
| 56414 | 160 | Connecting to PB | USM_87637_IGM  | IGHV6-1  | CVRGKYSADFIDW              | IGHJ3 | PB  | 35    |
| 56414 | 160 | Connecting to PB | SM_200000_IGG  | IGHV6-1  | CARGIHSGFIDW               | IGHJ3 | PB  | 36    |
| 56414 | 160 | Connecting to PB | SM_200000_IGG  | IGHV6-1  | CARGIWNADFIDW              | IGHJ3 | PB  | 36    |
| 56414 | 160 | Connecting to PB | SM_200000_IGG  | IGHV6-1  | CARGRDSAFDIW               | IGHJ3 | PB  | 54    |
| 56414 | 160 | Connecting to PB | SM_200000_IGG  | IGHV6-1  | CARGQWTAFDVW               | IGHJ3 | PB  | 59    |
| 56414 | 160 | Connecting to PB | SM_200000_IGG  | IGHV6-1  | CARGRRNAFDIW               | IGHJ3 | PB  | 59    |
| 56414 | 160 | Connecting to PB | SM_200000_IGG  | IGHV6-1  | CARGRHNAFDIW               | IGHJ3 | PB  | 64    |
| 56414 | 160 | Connecting to PB | DN_61743_IGG   | IGHV6-1  | CVRGQWTAFDIW               | IGHJ3 | PB  | 65    |
| 56414 | 160 | Connecting to PB | SM_200000_IGG  | IGHV6-1  | CARGTHSAFDVW               | IGHJ3 | PB  | 69    |
| 56414 | 160 | Connecting to PB | SM_200000_IGG  | IGHV6-1  | CARGQYTAFDIW               | IGHJ3 | PB  | 85    |
| 56414 | 160 | Connecting to PB | SM_200000_IGG  | IGHV6-1  | CVRGQHSADFIDW              | IGHJ3 | PB  | 91    |
| 56414 | 160 | Connecting to PB | SM_200000_IGG  | IGHV6-1  | CARGIHNAFDIW               | IGHJ3 | PB  | 113   |
| 56414 | 160 | Connecting to PB | SM_200000_IGG  | IGHV6-1  | CARGQWTAFNIDW              | IGHJ3 | PB  | 127   |
| 56414 | 160 | Connecting to PB | DN_61743_IGG   | IGHV6-1  | CARGRDNAFDIW               | IGHJ3 | PB  | 139   |
| 56414 | 160 | Connecting to PB | SM_200000_IGG  | IGHV6-1  | CARGINSADFIDW              | IGHJ3 | PB  | 145   |
| 56414 | 160 | Connecting to PB | SM_200000_IGG  | IGHV6-1  | CANGAKSAFDIW               | IGHJ3 | PB  | 166   |
| 56414 | 160 | Connecting to PB | SM_200000_IGG  | IGHV6-1  | CARGIWNTFDIW               | IGHJ3 | PB  | 174   |
| 56414 | 160 | Connecting to PB | SM_200000_IGG  | IGHV6-1  | CARGGNYADFIDW              | IGHJ3 | PB  | 183   |
| 56414 | 160 | Connecting to PB | SM_200000_IGG  | IGHV6-1  | CARGIRNGFDLW               | IGHJ3 | PB  | 189   |
| 56414 | 160 | Connecting to PB | SM_200000_IGG  | IGHV6-1  | CARGTHSAFDIW               | IGHJ3 | PB  | 197   |
| 56414 | 160 | Connecting to PB | SM_200000_IGM  | IGHV6-1  | CARGIWNADFIDW              | IGHJ3 | PB  | 201   |
| 56414 | 160 | Connecting to PB | SM_200000_IGG  | IGHV6-1  | CARGRSSAFDIW               | IGHJ3 | PB  | 204   |
| 56414 | 160 | Connecting to PB | SM_200000_IGG  | IGHV6-1  | CASGRSSGFIDW               | IGHJ3 | PB  | 204   |
| 56414 | 160 | Connecting to PB | SM_200000_IGG  | IGHV6-1  | CARGKWTAFDIW               | IGHJ3 | PB  | 214   |
| 56414 | 160 | Connecting to PB | SM_200000_IGG  | IGHV6-1  | CARGRNSAFDIW               | IGHJ3 | PB  | 289   |
| 56414 | 160 | Connecting to PB | SM_200000_IGG  | IGHV6-1  | CARGQWTAFDIW               | IGHJ3 | PB  | 379   |
| 56414 | 160 | Connecting to PB | SM_200000_IGG  | IGHV6-1  | CARGINNGFDVW               | IGHJ3 | PB  | 407   |
| 56414 | 160 | Connecting to PB | SM_200000_IGG  | IGHV6-1  | CARGRDNAFDIW               | IGHJ3 | PB  | 420   |
| 56414 | 160 | Connecting to PB | SM_200000_IGG  | IGHV6-1  | CVRGQWSADFIDW              | IGHJ3 | PB  | 451   |
| 56414 | 160 | Connecting to PB | SM_200000_IGG  | IGHV6-1  | CARGTRSAFDIW               | IGHJ3 | PB  | 490   |
| 56414 | 160 | Connecting to PB | SM_200000_IGG  | IGHV6-1  | CVRGQWTAFDIW               | IGHJ3 | PB  | 1165  |
| 56414 | 160 | Connecting to PB | PC_2081_IGG    | IGHV6-1  | CARGFHNAFDIW               | IGHJ3 | PB  | 31271 |
| 56414 | 161 | CSF exclusive    | CSF-SM_796_IGG | IGHV1-2  | CARRGRGVAATPQYYYYYFMDVW    | IGHJ6 | CSF | 4     |
| 56414 | 161 | CSF exclusive    | CSF-SM_796_IGG | IGHV1-2  | CARRGRGVAATPQYYYYYFMDVW    | IGHJ6 | CSF | 138   |
| 56414 | 162 | Connecting to PB | CSF-SM_796_IGG | IGHV1-3  | CARGGVDGPPPW               | IGHJ5 | CSF | 1     |
| 56414 | 162 | Connecting to PB | DN_61743_IGG   | IGHV1-3  | CARGGVDGPPPW               | IGHJ5 | PB  | 1     |
| 56414 | 162 | Connecting to PB | USM_87637_IGM  | IGHV1-3  | CARGGVDGPPPW               | IGHJ5 | PB  | 87    |
| 56414 | 162 | Connecting to PB | SM_200000_IGM  | IGHV1-3  | CARGGVDGPPPW               | IGHJ5 | PB  | 130   |
| 56414 | 162 | Connecting to PB | PC_2081_IGG    | IGHV1-3  | CARGGVDGPPPW               | IGHJ5 | PB  | 614   |
| 56414 | 162 | Connecting to PB | SM_200000_IGG  | IGHV1-3  | CARGGVDGPPPW               | IGHJ5 | PB  | 14652 |
| 56414 | 163 | CSF exclusive    | CSF-SM_796_IGG | IGHV4-34 | CARGNSYNSDWAADSNNYYYYYMDVW | IGHJ6 | CSF | 21    |
| 56414 | 164 | CSF exclusive    | CSF-SM_796_IGG | IGHV4-34 | CARGNSYNSDWAADSNNYYYYYMDVW | IGHJ6 | CSF | 281   |
| 56414 | 165 | CSF exclusive    | CSF-SM_796_IGG | IGHV4-34 | CARGPGLLHTYFDVW            | IGHJ4 | CSF | 101   |
| 56414 | 166 | CSF exclusive    | CSF-SM_796_IGG | IGHV4-34 | CARGPGLQTYFDVW             | IGHJ6 | CSF | 1     |
| 56414 | 167 | Connecting to PB | CSF-SM_796_IGG | IGHV3-74 | CARGQGAAVW                 | IGHJ4 | CSF | 4     |
| 56414 | 167 | Connecting to PB | SM_200000_IGG  | IGHV3-74 | CARGQGAAVW                 | IGHJ4 | PB  | 4     |
| 56414 | 168 | CSF exclusive    | CSF-SM_796_IGG | IGHV1-69 | CARGRHYDSTTYSDDFW          | IGHJ4 | CSF | 18    |
| 56414 | 169 | CSF exclusive    | CSF-SM_796_IGG | IGHV3-30 | CARGTRIAAAGIFDIW           | IGHJ4 | CSF | 183   |
| 56414 | 170 | Connecting to PB | CSF-SM_796_IGG | IGHV4-39 | CARHQYGDGFIDW              | IGHJ3 | CSF | 12    |
| 56414 | 170 | Connecting to PB | SM_200000_IGG  | IGHV4-39 | CARHQYGDGFIDW              | IGHJ3 | PB  | 1     |
| 56414 | 170 | Connecting to PB | SM_200000_IGG  | IGHV4-39 | CARHQYGYGFIDW              | IGHJ3 | PB  | 1     |
| 56414 | 170 | Connecting to PB | SM_200000_IGG  | IGHV4-39 | CARHQYGDGFIDW              | IGHJ3 | PB  | 59    |
| 56414 | 171 | CSF exclusive    | CSF-SM_796_IGG | IGHV4-39 | CARHSGFSYYYYYMDVW          | IGHJ6 | CSF | 10    |
| 56414 | 172 | CSF exclusive    | CSF-SM_796_IGG | IGHV3-53 | CARIYRDFDHTGFSFPLDIW       | IGHJ4 | CSF | 1     |
| 56414 | 173 | Connecting to PB | CSF-SM_796_IGG | IGHV1-18 | CARKMVADYW                 | IGHJ4 | CSF | 3     |
| 56414 | 173 | Connecting to PB | SM_200000_IGG  | IGHV1-18 | CARKMVADHW                 | IGHJ4 | PB  | 25    |
| 56414 | 173 | Connecting to PB | SM_200000_IGG  | IGHV1-18 | CARKMVADYW                 | IGHJ4 | PB  | 27    |
| 56414 | 174 | Connecting to PB | CSF-SM_796_IGG | IGHV2-26 | CARLNEDLLVNAFDIW           | IGHJ3 | CSF | 1     |
| 56414 | 174 | Connecting to PB | SM_200000_IGG  | IGHV2-26 | CARINEDLLVNAFDIW           | IGHJ3 | PB  | 43    |
| 56414 | 175 | CSF exclusive    | CSF-SM_796_IGG | IGHV4-59 | CARMRYNSGFVHWYFDLW         | IGHJ2 | CSF | 5     |
| 56414 | 176 | Connecting to PB | CSF-SM_796_IGG | IGHV4-39 | CARRPQTFYDITIGHEYFDYW      | IGHJ4 | CSF | 1     |
| 56414 | 176 | Connecting to PB | DN_61743_IGG   | IGHV4-39 | CARRPQTFYDITIGHEYFDYW      | IGHJ4 | PB  | 2606  |
| 56414 | 177 | Connecting to PB | CSF-SM_796_IGG | IGHV3-48 | CARSGATSSSTLIDYW           | IGHJ4 | CSF | 260   |
| 56414 | 177 | Connecting to PB | PC_2081_IGG    | IGHV3-48 | CARSGATSSSTLIDYW           | IGHJ4 | PB  | 416   |
| 56414 | 178 | Connecting to PB | CSF-SM_796_IGG | IGHV4-39 | CARSSWFYFDPL               | IGHJ2 | CSF | 9     |
| 56414 | 178 | Connecting to PB | CSF-SM_796_IGG | IGHV4-39 | CARSGWFYFDPW               | IGHJ2 | CSF | 945   |
| 56414 | 178 | Connecting to PB | CSF-SM_796_IGG | IGHV4-39 | CARSSWFYFDPW               | IGHJ2 | CSF | 2626  |

|       |     |                  |                  |          |                         |       |     |       |
|-------|-----|------------------|------------------|----------|-------------------------|-------|-----|-------|
| 56414 | 178 | Connecting to PB | PC_2081_IGG      | IGHV4-39 | CARSSWFYFDPW            | IGHJ2 | PB  | 1     |
| 56414 | 178 | Connecting to PB | SM_200000_IGG    | IGHV4-39 | CARSSWFHFDPW            | IGHJ2 | PB  | 6     |
| 56414 | 178 | Connecting to PB | DN_61743_IGG     | IGHV4-39 | CARSSWFYFDPW            | IGHJ2 | PB  | 15    |
| 56414 | 178 | Connecting to PB | SM_200000_IGG    | IGHV4-39 | CARSGWFYFDPW            | IGHJ2 | PB  | 44    |
| 56414 | 178 | Connecting to PB | SM_200000_IGG    | IGHV4-39 | CARSSWFYFDPW            | IGHJ2 | PB  | 103   |
| 56414 | 179 | Connecting to PB | CSF-SM_796_IGG   | IGHV2-70 | CARTVLGSSHQRDTYW        | IGHJ4 | CSF | 17    |
| 56414 | 179 | Connecting to PB | PC_2081_IGG      | IGHV2-70 | CARTVLGSSHQRDTYW        | IGHJ4 | PB  | 1     |
| 56414 | 179 | Connecting to PB | SM_200000_IGM    | IGHV2-70 | CARTVLGSSHQRDTYW        | IGHJ4 | PB  | 2     |
| 56414 | 179 | Connecting to PB | SM_200000_IGG    | IGHV2-70 | CARAVLGGSHQRDTYW        | IGHJ4 | PB  | 18    |
| 56414 | 179 | Connecting to PB | DN_61743_IGG     | IGHV2-70 | CARTVLGSSHQRDTYW        | IGHJ4 | PB  | 228   |
| 56414 | 179 | Connecting to PB | SM_200000_IGG    | IGHV2-70 | CARTVLGSSHQRDTYW        | IGHJ4 | PB  | 270   |
| 56414 | 180 | CSF exclusive    | CSF-SM_796_IGG   | IGHV3-66 | CARVADSSGWYTSYD         | IGHJ4 | CSF | 2     |
| 56414 | 181 | Connecting to PB | CSF-SM_796_IGG   | IGHV3-7  | CATDPPQHW               | IGHJ4 | CSF | 9     |
| 56414 | 181 | Connecting to PB | SM_200000_IGG    | IGHV3-7  | CATDPPQHW               | IGHJ4 | PB  | 22    |
| 56414 | 182 | Connecting to PB | CSF-SM_796_IGG   | IGHV1-24 | CATHPIVVAGIFDYW         | IGHJ4 | CSF | 205   |
| 56414 | 182 | Connecting to PB | SM_200000_IGG    | IGHV1-24 | CATHPIVAVAGIFDYW        | IGHJ4 | PB  | 49    |
| 56414 | 182 | Connecting to PB | SM_200000_IGG    | IGHV1-24 | CATHPIVVAGIFDYW         | IGHJ4 | PB  | 79    |
| 56414 | 183 | Connecting to PB | CSF-SM_796_IGG   | IGHV1-24 | CATHPVTVATIFDYW         | IGHJ4 | CSF | 24    |
| 56414 | 183 | Connecting to PB | SM_200000_IGG    | IGHV1-24 | CATHPVTVATIFDYW         | IGHJ4 | PB  | 20    |
| 56414 | 184 | Connecting to PB | CSF-SM_796_IGG   | IGHV3-30 | CGRDPGYSTPLGYLQHW       | IGHJ1 | CSF | 1     |
| 56414 | 184 | Connecting to PB | SM_200000_IGM    | IGHV3-30 | CGRDPGYSTPLGYLQHW       | IGHJ1 | PB  | 22    |
| 56414 | 185 | Connecting to PB | CSF-SM_796_IGG   | IGHV3-74 | CVRERDAYYNSGFDPW        | IGHJ5 | CSF | 1555  |
| 56414 | 185 | Connecting to PB | SM_200000_IGG    | IGHV3-74 | CARERDPYYNSGFDPW        | IGHJ5 | PB  | 5     |
| 56414 | 185 | Connecting to PB | DN_61743_IGG     | IGHV3-74 | CVRERDPYYNSGFDPW        | IGHJ5 | PB  | 26    |
| 56414 | 185 | Connecting to PB | SM_200000_IGG    | IGHV3-74 | CVRERDPYYNSGFDPW        | IGHJ5 | PB  | 31    |
| 56414 | 185 | Connecting to PB | SM_200000_IGG    | IGHV3-74 | CVRERDAYYNSGFDPW        | IGHJ5 | PB  | 50    |
| 56414 | 186 | Connecting to PB | CSF-SM_796_IGM   | IGHV3-23 | CAKDLIELYSGSNYPHYWFFDLW | IGHJ2 | CSF | 12    |
| 56414 | 186 | Connecting to PB | USM_87637_IGM    | IGHV3-23 | CAKDLIELYSGSNYPHYWFFDLW | IGHJ2 | PB  | 4     |
| 56414 | 187 | CSF exclusive    | CSF-SM_796_IGM   | IGHV1-46 | CAKRIKVPGHDAFDVW        | IGHJ3 | CSF | 51    |
| 56414 | 188 | CSF exclusive    | CSF-SM_796_IGM   | IGHV4-55 | CAMQPQVREGAFDIW         | IGHJ3 | CSF | 1     |
| 56414 | 189 | CSF exclusive    | CSF-SM_796_IGM   | IGHV3-74 | CARAVGITDAFDIW          | IGHJ3 | CSF | 19    |
| 56414 | 190 | Connecting to PB | CSF-SM_796_IGM   | IGHV4-31 | CARERDHW                | IGHJ4 | CSF | 56    |
| 56414 | 190 | Connecting to PB | SM_200000_IGG    | IGHV4-31 | CARDRDYW                | IGHJ4 | PB  | 2     |
| 56414 | 190 | Connecting to PB | SM_200000_IGG    | IGHV4-31 | CARERDSW                | IGHJ4 | PB  | 2     |
| 56414 | 190 | Connecting to PB | USM_87637_IGM    | IGHV4-31 | CARAPDYW                | IGHJ4 | PB  | 10    |
| 56414 | 190 | Connecting to PB | USM_87637_IGM    | IGHV4-31 | CARDRDYW                | IGHJ4 | PB  | 10    |
| 56414 | 190 | Connecting to PB | DN_61743_IGG     | IGHV4-31 | CAREFDYW                | IGHJ4 | PB  | 10    |
| 56414 | 190 | Connecting to PB | USM_87637_IGM    | IGHV4-31 | CARERDFW                | IGHJ4 | PB  | 10    |
| 56414 | 190 | Connecting to PB | SM_200000_IGM    | IGHV4-31 | CARDRDYW                | IGHJ4 | PB  | 102   |
| 56414 | 191 | Connecting to PB | CSF-SM_796_IGM   | IGHV4-34 | CARGATMIVGREDWFDPW      | IGHJ5 | CSF | 46    |
| 56414 | 191 | Connecting to PB | USM_87637_IGM    | IGHV4-34 | CARGATMIVGREDWFDPW      | IGHJ5 | PB  | 17    |
| 56414 | 192 | CSF exclusive    | CSF-SM_796_IGM   | IGHV1-3  | CARGIWSGTSMLYLDWS       | IGHJ4 | CSF | 68    |
| 56414 | 193 | CSF exclusive    | CSF-SM_796_IGM   | IGHV5-51 | CARLPSYGDYDHTYFDYW      | IGHJ4 | CSF | 11    |
| 56414 | 194 | CSF exclusive    | CSF-SM_796_IGM   | IGHV4-39 | CARLSDYSDTGGHYWYFDLW    | IGHJ2 | CSF | 1     |
| 56414 | 195 | Connecting to PB | CSF-SM_796_IGM   | IGHV4-59 | CARRDSNGYIYW            | IGHJ4 | CSF | 38    |
| 56414 | 195 | Connecting to PB | USM_87637_IGM    | IGHV4-59 | CARRDNNGYIYW            | IGHJ4 | PB  | 3     |
| 56414 | 195 | Connecting to PB | USM_87637_IGM    | IGHV4-59 | CARRDSNGYIHW            | IGHJ4 | PB  | 3     |
| 56414 | 195 | Connecting to PB | USM_87637_IGM    | IGHV4-59 | CARRDSTGYYSYW           | IGHJ4 | PB  | 8     |
| 56414 | 195 | Connecting to PB | USM_87637_IGM    | IGHV4-59 | CARRDNNGYIIFW           | IGHJ4 | PB  | 10    |
| 56414 | 196 | Connecting to PB | CSF-SM_796_IGM   | IGHV2-5  | CTHRQKGTGTMDVW          | IGHJ6 | CSF | 163   |
| 56414 | 196 | Connecting to PB | Naive_200000_IGM | IGHV2-5  | CTHRQKGTGTMDVW          | IGHJ6 | PB  | 2     |
| 56414 | 197 | Connecting to PB | CSF-SM_796_IGM   | IGHV3-74 | CTRDLYGIDHW             | IGHJ4 | CSF | 10    |
| 56414 | 197 | Connecting to PB | SM_200000_IGG    | IGHV3-74 | CTRDLYGIDHW             | IGHJ4 | PB  | 3     |
| 56414 | 197 | Connecting to PB | SM_200000_IGM    | IGHV3-74 | CTRDLYGIDHW             | IGHJ4 | PB  | 14    |
| 56414 | 198 | CSF exclusive    | CSF-SM_796_IGM   | IGHV3-53 | CTRGLDINDHW             | IGHJ4 | CSF | 7     |
| 56414 | 199 | CSF exclusive    | CSF-SM_796_IGM   | IGHV3-23 | CTRGPDINDHW             | IGHJ4 | CSF | 1     |
| 56414 | 200 | CSF exclusive    | CSF-SM_796_IGM   | IGHV3-74 | CVRGGDWGSFDYW           | IGHJ4 | CSF | 27    |
| 56514 | 1   | Connecting to PB | CSF-DN_89_IGG    | IGHV3-23 | CAKAPLETCTSGARCYLDHW    | IGHJ4 | CSF | 1     |
| 56514 | 1   | Connecting to PB | USM_89486_IGM    | IGHV3-23 | CAKAPLETCTGSRRCYLDHW    | IGHJ4 | PB  | 1     |
| 56514 | 1   | Connecting to PB | USM_89486_IGM    | IGHV3-23 | CAKAPLETCTGVRCHYLDHW    | IGHJ4 | PB  | 1     |
| 56514 | 1   | Connecting to PB | SM_188264_IGG    | IGHV3-23 | CAKAPLESCSGSRRCYLDHW    | IGHJ4 | PB  | 2     |
| 56514 | 1   | Connecting to PB | PC_1001_IGG      | IGHV3-23 | CAKAPLETCTGARCYLDHW     | IGHJ4 | PB  | 2     |
| 56514 | 1   | Connecting to PB | SM_188264_IGG    | IGHV3-23 | CAKAPLESCSGSRRCYLDHW    | IGHJ4 | PB  | 4     |
| 56514 | 1   | Connecting to PB | PC_1001_IGM      | IGHV3-23 | CTKAPLETCTGVRRCYLDHW    | IGHJ4 | PB  | 4     |
| 56514 | 1   | Connecting to PB | PC_1001_IGG      | IGHV3-23 | CAKAPLETCTGVRRCYLDHW    | IGHJ4 | PB  | 5     |
| 56514 | 1   | Connecting to PB | SM_188264_IGG    | IGHV3-23 | CAKAPLESCSGSRRCYLDHW    | IGHJ4 | PB  | 6     |
| 56514 | 1   | Connecting to PB | SM_188264_IGG    | IGHV3-23 | CAKAPLETCTGARCYLDHW     | IGHJ4 | PB  | 7     |
| 56514 | 1   | Connecting to PB | PC_1001_IGG      | IGHV3-23 | CAKAPLETCTGSRRCYLDHW    | IGHJ4 | PB  | 17    |
| 56514 | 1   | Connecting to PB | PC_1001_IGM      | IGHV3-23 | CAKAPLETCTGARCYLDHW     | IGHJ4 | PB  | 68    |
| 56514 | 1   | Connecting to PB | PC_1001_IGM      | IGHV3-23 | CAKAPLETCTGVRRCYLDHW    | IGHJ4 | PB  | 498   |
| 56514 | 1   | Connecting to PB | PC_1001_IGM      | IGHV3-23 | CAKAPLETCTGSRRCYLDHW    | IGHJ4 | PB  | 2050  |
| 56514 | 1   | Connecting to PB | PC_1001_IGG      | IGHV3-23 | CAKAPLETCTGSRRCYLDHW    | IGHJ4 | PB  | 2865  |
| 56514 | 2   | Connecting to PB | CSF-DN_89_IGG    | IGHV3-23 | CAKTPHSSGWYGLYDYW       | IGHJ4 | CSF | 1     |
| 56514 | 2   | Connecting to PB | SM_188264_IGG    | IGHV3-23 | CAKTPHSSGWYGLYDYW       | IGHJ4 | PB  | 7     |
| 56514 | 3   | Connecting to PB | CSF-SM_1022_IGG  | IGHV1-46 | RARTLGYGMDVW            | IGHJ6 | CSF | 2     |
| 56514 | 3   | Connecting to PB | CSF-SM_1022_IGG  | IGHV1-46 | CARALGYGMDVW            | IGHJ6 | CSF | 1052  |
| 56514 | 3   | Connecting to PB | CSF-DN_89_IGG    | IGHV1-46 | CARALGYGMDVW            | IGHJ6 | CSF | 10150 |
| 56514 | 3   | Connecting to PB | PC_1001_IGG      | IGHV1-46 | CARALGYGMDVW            | IGHJ6 | PB  | 2     |
| 56514 | 3   | Connecting to PB | DN_35706_IGG     | IGHV1-46 | CARALGYGMDVW            | IGHJ6 | PB  | 3     |
| 56514 | 3   | Connecting to PB | SM_188264_IGG    | IGHV1-46 | CARALGYGMDVW            | IGHJ6 | PB  | 171   |
| 56514 | 4   | CSF exclusive    | CSF-SM_1022_IGG  | IGHV1-46 | CARDELGLKFDYW           | IGHJ1 | CSF | 243   |
| 56514 | 4   | CSF exclusive    | CSF-DN_89_IGG    | IGHV1-46 | CARDELGLKFDYW           | IGHJ1 | CSF | 1024  |
| 56514 | 5   | Connecting to PB | CSF-DN_89_IGG    | IGHV1-69 | CARDLRGPGVW             | IGHJ5 | CSF | 620   |
| 56514 | 5   | Connecting to PB | PC_1001_IGG      | IGHV1-69 | CARDLRGPGVW             | IGHJ5 | PB  | 2     |
| 56514 | 5   | Connecting to PB | SM_188264_IGG    | IGHV1-69 | CARDLRGPGVW             | IGHJ5 | PB  | 2     |

|       |    |                  |                  |          |                        |       |     |      |
|-------|----|------------------|------------------|----------|------------------------|-------|-----|------|
| 56514 | 5  | Connecting to PB | DN_35706_IGG     | IGHV1-69 | CARDPRGPGVW            | IGHJ5 | PB  | 2    |
| 56514 | 5  | Connecting to PB | DN_35706_IGG     | IGHV1-69 | CARDLRGPGVW            | IGHJ5 | PB  | 53   |
| 56514 | 6  | CSF exclusive    | CSF-DN_89_IGG    | IGHV4-34 | CARGQVAGIVAGVVNW       | IGHJ4 | CSF | 357  |
| 56514 | 7  | Connecting to PB | CSF-SM_1022_IGG  | IGHV3-23 | CVSPSAGW               | IGHJ5 | CSF | 1    |
| 56514 | 7  | Connecting to PB | CSF-DN_89_IGG    | IGHV3-23 | CASPSAGW               | IGHJ5 | CSF | 72   |
| 56514 | 7  | Connecting to PB | CSF-SM_1022_IGG  | IGHV3-23 | CASPSAGW               | IGHJ5 | CSF | 72   |
| 56514 | 7  | Connecting to PB | SM_188264_IGG    | IGHV3-23 | CASPSAGW               | IGHJ5 | PB  | 15   |
| 56514 | 8  | CSF exclusive    | CSF-DN_89_IGG    | IGHV2-70 | CIGSLGPTTFFDDAFEIW     | IGHJ3 | CSF | 98   |
| 56514 | 9  | CSF exclusive    | CSF-N_190_IGM    | IGHV1-58 | CAALPPDYGDYLVVW        | IGHJ4 | CSF | 1    |
| 56514 | 9  | CSF exclusive    | CSF-N_190_IGM    | IGHV1-58 | CAALLPDYGDYLVVW        | IGHJ4 | CSF | 12   |
| 56514 | 10 | CSF exclusive    | CSF-N_190_IGM    | IGHV1-58 | CAAPRPEMATSPLDYW       | IGHJ4 | CSF | 5    |
| 56514 | 11 | CSF exclusive    | CSF-N_190_IGM    | IGHV3-11 | CAGTEAAPLNWYFDLW       | IGHJ2 | CSF | 54   |
| 56514 | 12 | Connecting to PB | CSF-N_190_IGM    | IGHV2-5  | CAHIALYSSGYWYPYW       | IGHJ4 | CSF | 1229 |
| 56514 | 12 | Connecting to PB | USM_89486_IGM    | IGHV2-5  | CAHIALYSSGYWYPYW       | IGHJ4 | PB  | 34   |
| 56514 | 13 | CSF exclusive    | CSF-N_190_IGM    | IGHV3-23 | CAKASDIVVDRWFDPW       | IGHJ5 | CSF | 47   |
| 56514 | 14 | CSF exclusive    | CSF-N_190_IGM    | IGHV3-23 | CAKCKNDFDDAFDIW        | IGHJ3 | CSF | 162  |
| 56514 | 15 | CSF exclusive    | CSF-N_190_IGM    | IGHV3-30 | CAKDSQSGYRIYFFDYW      | IGHJ4 | CSF | 1    |
| 56514 | 15 | CSF exclusive    | CSF-N_190_IGM    | IGHV3-30 | CAKDSQSGYRIYFLDYW      | IGHJ4 | CSF | 7    |
| 56514 | 16 | CSF exclusive    | CSF-N_190_IGM    | IGHV3-30 | CAKDSYDILPFYGMVDVW     | IGHJ6 | CSF | 49   |
| 56514 | 17 | CSF exclusive    | CSF-N_190_IGM    | IGHV3-30 | CAKEQKHSGSFDYW         | IGHJ4 | CSF | 8    |
| 56514 | 18 | CSF exclusive    | CSF-N_190_IGM    | IGHV3-23 | CAKGESGMNYW            | IGHJ4 | CSF | 40   |
| 56514 | 19 | CSF exclusive    | CSF-N_190_IGM    | IGHV3-30 | CAKGYFDYYGMVDVW        | IGHJ6 | CSF | 46   |
| 56514 | 20 | CSF exclusive    | CSF-N_190_IGM    | IGHV3-30 | CAKGLDTPTDYW           | IGHJ4 | CSF | 1    |
| 56514 | 21 | CSF exclusive    | CSF-N_190_IGM    | IGHV3-23 | CAKIGGRGYSYGDSYW       | IGHJ4 | CSF | 70   |
| 56514 | 22 | CSF exclusive    | CSF-N_190_IGM    | IGHV3-30 | CAKPYDSSAYLDYW         | IGHJ4 | CSF | 10   |
| 56514 | 23 | CSF exclusive    | CSF-N_190_IGM    | IGHV3-23 | CAKRRCSGGSCYGDHYGMVDVW | IGHJ6 | CSF | 89   |
| 56514 | 24 | CSF exclusive    | CSF-N_190_IGM    | IGHV3-23 | CAKTGPPYTSGLWDYW       | IGHJ4 | CSF | 67   |
| 56514 | 25 | CSF exclusive    | CSF-N_190_IGM    | IGHV3-23 | CANLGATQDYW            | IGHJ4 | CSF | 153  |
| 56514 | 26 | CSF exclusive    | CSF-N_190_IGM    | IGHV3-30 | CANQHSSGRLPDYW         | IGHJ4 | CSF | 2    |
| 56514 | 26 | CSF exclusive    | CSF-N_190_IGM    | IGHV3-30 | CANQHSSGWLDPDYW        | IGHJ4 | CSF | 19   |
| 56514 | 27 | Connecting to PB | CSF-N_190_IGM    | IGHV4-39 | CAQSRDGYNSLHYW         | IGHJ4 | CSF | 1    |
| 56514 | 27 | Connecting to PB | USM_89486_IGM    | IGHV4-39 | CAQSGDGYNSLHYW         | IGHJ4 | PB  | 1    |
| 56514 | 27 | Connecting to PB | PC_1001_IGM      | IGHV4-39 | CARSRDGYNSLHYW         | IGHJ4 | PB  | 1    |
| 56514 | 27 | Connecting to PB | PC_1001_IGG      | IGHV4-39 | CVQSRDGHNSLHYW         | IGHJ4 | PB  | 1    |
| 56514 | 27 | Connecting to PB | USM_89486_IGM    | IGHV4-39 | RAQSRDGYNSLHYW         | IGHJ4 | PB  | 1    |
| 56514 | 27 | Connecting to PB | SM_188264_IGM    | IGHV4-39 | CAQSRDGYNSLHYW         | IGHJ4 | PB  | 4    |
| 56514 | 27 | Connecting to PB | USM_89486_IGM    | IGHV4-39 | CAQSRDGYNSLHYW         | IGHJ4 | PB  | 14   |
| 56514 | 27 | Connecting to PB | PC_1001_IGG      | IGHV4-39 | CAQSRDGYNSLHYW         | IGHJ4 | PB  | 54   |
| 56514 | 27 | Connecting to PB | PC_1001_IGM      | IGHV4-39 | CAQSRDGYNSLHYW         | IGHJ4 | PB  | 9726 |
| 56514 | 28 | CSF exclusive    | CSF-N_190_IGM    | IGHV4-31 | CARAGREFWSSGYTTHW      | IGHJ5 | CSF | 335  |
| 56514 | 29 | CSF exclusive    | CSF-N_190_IGM    | IGHV4-55 | CARDALSYGDYGGLEDYW     | IGHJ4 | CSF | 731  |
| 56514 | 30 | CSF exclusive    | CSF-N_190_IGM    | IGHV3-21 | CARDGFINHDYGYGMVDVW    | IGHJ6 | CSF | 8    |
| 56514 | 31 | CSF exclusive    | CSF-N_190_IGM    | IGHV1-3  | CARDGTNWAYLYW          | IGHJ4 | CSF | 1    |
| 56514 | 31 | CSF exclusive    | CSF-N_190_IGM    | IGHV1-3  | CVRDGTNWASDYW          | IGHJ4 | CSF | 1    |
| 56514 | 31 | CSF exclusive    | CSF-N_190_IGM    | IGHV1-3  | CARDGTNWAYLDYW         | IGHJ4 | CSF | 13   |
| 56514 | 31 | CSF exclusive    | CSF-N_190_IGM    | IGHV1-3  | CARDGTNWAYFDYW         | IGHJ4 | CSF | 322  |
| 56514 | 32 | CSF exclusive    | CSF-N_190_IGM    | IGHV3-48 | CARDGWLRFDYW           | IGHJ4 | CSF | 58   |
| 56514 | 33 | CSF exclusive    | CSF-N_190_IGM    | IGHV3-21 | CARDLGYCSGGSCYSYGMVDVW | IGHJ6 | CSF | 62   |
| 56514 | 34 | CSF exclusive    | CSF-N_190_IGM    | IGHV1-18 | CARDPTGWELLNDAFDIW     | IGHJ3 | CSF | 157  |
| 56514 | 35 | Connecting to PB | CSF-N_190_IGM    | IGHV1-46 | CARDRDNGMDVW           | IGHJ6 | CSF | 235  |
| 56514 | 35 | Connecting to PB | Naive_290198_IGM | IGHV1-46 | CARDWENGMDVW           | IGHJ6 | PB  | 2    |
| 56514 | 36 | CSF exclusive    | CSF-N_190_IGM    | IGHV1-46 | CARDRDSGSTPEWDYW       | IGHJ4 | CSF | 83   |
| 56514 | 37 | CSF exclusive    | CSF-N_190_IGM    | IGHV3-48 | CARDRTVDTAIPALRFPDW    | IGHJ5 | CSF | 23   |
| 56514 | 38 | CSF exclusive    | CSF-N_190_IGM    | IGHV1-46 | CARDSDSGGINYGMVDVW     | IGHJ6 | CSF | 233  |
| 56514 | 39 | CSF exclusive    | CSF-N_190_IGM    | IGHV3-21 | CARDTRSLALDYW          | IGHJ4 | CSF | 54   |
| 56514 | 40 | CSF exclusive    | CSF-N_190_IGM    | IGHV1-3  | CARDWKSLLWFRSSGWFDPW   | IGHJ5 | CSF | 1077 |
| 56514 | 41 | CSF exclusive    | CSF-N_190_IGM    | IGHV3-53 | CARDYDSSGYFNYGMDVW     | IGHJ6 | CSF | 61   |
| 56514 | 42 | CSF exclusive    | CSF-N_190_IGM    | IGHV3-21 | CARGMNYDSYGLDVW        | IGHJ6 | CSF | 3    |
| 56514 | 42 | CSF exclusive    | CSF-N_190_IGM    | IGHV3-21 | CAREMNYDSYGLDVW        | IGHJ6 | CSF | 32   |
| 56514 | 43 | CSF exclusive    | CSF-N_190_IGM    | IGHV3-48 | CAREMVRGSHMGARGSIGYW   | IGHJ4 | CSF | 111  |
| 56514 | 44 | CSF exclusive    | CSF-N_190_IGM    | IGHV3-53 | CARESGSFDYW            | IGHJ4 | CSF | 10   |
| 56514 | 45 | CSF exclusive    | CSF-N_190_IGM    | IGHV4-31 | CAREVLRSGPGVPDWYFDLW   | IGHJ2 | CSF | 1    |
| 56514 | 45 | CSF exclusive    | CSF-N_190_IGM    | IGHV4-31 | CAREVLWFGPGVPDWYFDLW   | IGHJ2 | CSF | 63   |
| 56514 | 46 | CSF exclusive    | CSF-N_190_IGM    | IGHV4-34 | CARGKRDDYNLRPNWFDPW    | IGHJ5 | CSF | 1    |
| 56514 | 46 | CSF exclusive    | CSF-N_190_IGM    | IGHV4-34 | CARGKRDGYNLRPNWFDPW    | IGHJ5 | CSF | 112  |
| 56514 | 47 | CSF exclusive    | CSF-N_190_IGM    | IGHV4-34 | CARGLRQQLVRCYYYGMDIW   | IGHJ6 | CSF | 1    |
| 56514 | 47 | CSF exclusive    | CSF-N_190_IGM    | IGHV4-34 | CARGLRQQLVRYYYGMDIW    | IGHJ6 | CSF | 1    |
| 56514 | 47 | CSF exclusive    | CSF-N_190_IGM    | IGHV4-34 | CARGLRQQLVRYYYGMDVW    | IGHJ6 | CSF | 277  |
| 56514 | 48 | CSF exclusive    | CSF-N_190_IGM    | IGHV4-34 | CARGLRQQLVRYYYGMDVW    | IGHJ6 | CSF | 4    |
| 56514 | 49 | CSF exclusive    | CSF-N_190_IGM    | IGHV1-18 | CARGSYGSPDDAFDIW       | IGHJ3 | CSF | 339  |
| 56514 | 50 | CSF exclusive    | CSF-N_190_IGM    | IGHV4-31 | CARGVIGAGSWLDPW        | IGHJ5 | CSF | 1    |
| 56514 | 50 | CSF exclusive    | CSF-N_190_IGM    | IGHV4-31 | CARGVIGTGSWLDPW        | IGHJ5 | CSF | 11   |
| 56514 | 50 | CSF exclusive    | CSF-N_190_IGM    | IGHV4-31 | CARGVIGTGSWFDPW        | IGHJ5 | CSF | 228  |
| 56514 | 51 | CSF exclusive    | CSF-N_190_IGM    | IGHV1-69 | CARGYDSSGYNYYSFFHYW    | IGHJ4 | CSF | 52   |
| 56514 | 52 | CSF exclusive    | CSF-N_190_IGM    | IGHV5-51 | RARHKGIDQGDYGMVDVW     | IGHJ6 | CSF | 1    |
| 56514 | 52 | CSF exclusive    | CSF-N_190_IGM    | IGHV5-51 | CARHKGIDQGDYGMVDVW     | IGHJ6 | CSF | 17   |
| 56514 | 53 | CSF exclusive    | CSF-N_190_IGM    | IGHV4-39 | CARHLAVRDWNYYYGMDVW    | IGHJ6 | CSF | 49   |
| 56514 | 54 | CSF exclusive    | CSF-N_190_IGM    | IGHV4-39 | CARHPSSSNYFDYW         | IGHJ4 | CSF | 41   |
| 56514 | 55 | CSF exclusive    | CSF-N_190_IGM    | IGHV1-69 | CARIGQLNAPDIW          | IGHJ3 | CSF | 36   |
| 56514 | 56 | CSF exclusive    | CSF-N_190_IGM    | IGHV2-70 | CARIRVWSSGYFGDAFDIW    | IGHJ3 | CSF | 473  |
| 56514 | 57 | CSF exclusive    | CSF-N_190_IGM    | IGHV2-70 | CARISMYGGANIDYW        | IGHJ4 | CSF | 128  |
| 56514 | 58 | CSF exclusive    | CSF-N_190_IGM    | IGHV3-21 | CARLGVAGPYW            | IGHJ4 | CSF | 1    |
| 56514 | 58 | CSF exclusive    | CSF-N_190_IGM    | IGHV3-21 | CARLGVAGPDYW           | IGHJ4 | CSF | 75   |
| 56514 | 59 | CSF exclusive    | CSF-N_190_IGM    | IGHV4-59 | CARLLGDDWFDPW          | IGHJ5 | CSF | 74   |

|       |     |                  |                  |          |                          |       |     |      |
|-------|-----|------------------|------------------|----------|--------------------------|-------|-----|------|
| 56514 | 60  | CSF exclusive    | CSF-N_190_IGM    | IGHV3-48 | CARNPQKLLADQYYYYGMDVW    | IGHJ6 | CSF | 41   |
| 56514 | 61  | CSF exclusive    | CSF-N_190_IGM    | IGHV5-51 | CARRGLGGALGYW            | IGHJ4 | CSF | 1    |
| 56514 | 61  | CSF exclusive    | CSF-N_190_IGM    | IGHV5-51 | CARRGLGALDYW             | IGHJ4 | CSF | 384  |
| 56514 | 62  | CSF exclusive    | CSF-N_190_IGM    | IGHV5-51 | CARRGYDTRLGWFPDW         | IGHJ5 | CSF | 420  |
| 56514 | 63  | Connecting to PB | CSF-N_190_IGM    | IGHV5-51 | CARSYYDSSGGYTYYYGMDVW    | IGHJ6 | CSF | 1    |
| 56514 | 63  | Connecting to PB | Naive_290198_IGM | IGHV5-51 | CARSYYDSSGGYTYYYGMDVW    | IGHJ6 | PB  | 3    |
| 56514 | 64  | CSF exclusive    | CSF-N_190_IGM    | IGHV1-3  | CAMTRYCRSTSCYEGYYYGTDVW  | IGHJ6 | CSF | 2    |
| 56514 | 64  | CSF exclusive    | CSF-N_190_IGM    | IGHV1-3  | CARTRYCRSTSCYEGYYYGMDVW  | IGHJ6 | CSF | 394  |
| 56514 | 65  | CSF exclusive    | CSF-N_190_IGM    | IGHV1-69 | CARTVVVGATTYYYYGMDVW     | IGHJ6 | CSF | 233  |
| 56514 | 66  | CSF exclusive    | CSF-N_190_IGM    | IGHV4-59 | CARVLVNNWFDPW            | IGHJ5 | CSF | 60   |
| 56514 | 67  | CSF exclusive    | CSF-N_190_IGM    | IGHV3-7  | CARVRFDWLLTMDYW          | IGHJ4 | CSF | 6    |
| 56514 | 68  | CSF exclusive    | CSF-N_190_IGM    | IGHV4-31 | CARVSEGGYSYGYALYYW       | IGHJ4 | CSF | 1    |
| 56514 | 69  | CSF exclusive    | CSF-N_190_IGM    | IGHV4-34 | CARVVNYDSSGSDGYLDYW      | IGHJ4 | CSF | 16   |
| 56514 | 69  | CSF exclusive    | CSF-N_190_IGM    | IGHV4-34 | CARVVNYDSSGSDGYFDYW      | IGHJ4 | CSF | 35   |
| 56514 | 70  | CSF exclusive    | CSF-N_190_IGM    | IGHV3-30 | CARVYGVPAANDYW           | IGHJ4 | CSF | 73   |
| 56514 | 71  | CSF exclusive    | CSF-N_190_IGM    | IGHV4-39 | CARYWDVDPW               | IGHJ5 | CSF | 343  |
| 56514 | 72  | CSF exclusive    | CSF-N_190_IGM    | IGHV4-59 | CASERLGNRGWFDPW          | IGHJ5 | CSF | 1413 |
| 56514 | 73  | CSF exclusive    | CSF-N_190_IGM    | IGHV4-59 | CASGGYSYATDW             | IGHJ4 | CSF | 1328 |
| 56514 | 74  | CSF exclusive    | CSF-N_190_IGM    | IGHV4-31 | CASGYDGRHLYDYW           | IGHJ4 | CSF | 1    |
| 56514 | 75  | CSF exclusive    | CSF-N_190_IGM    | IGHV4-59 | CASGYGGRHYFDYW           | IGHJ4 | CSF | 1    |
| 56514 | 75  | CSF exclusive    | CSF-N_190_IGM    | IGHV4-59 | CASGYGGRHYFDYW           | IGHJ4 | CSF | 66   |
| 56514 | 76  | CSF exclusive    | CSF-N_190_IGM    | IGHV3-21 | CASLPRAYSSSPPRYW         | IGHJ4 | CSF | 39   |
| 56514 | 77  | CSF exclusive    | CSF-N_190_IGM    | IGHV3-21 | CASLVVPAAIHYYGMDVW       | IGHJ6 | CSF | 33   |
| 56514 | 78  | CSF exclusive    | CSF-N_190_IGM    | IGHV4-31 | CASPHRFCSGGSCYFIW        | IGHJ5 | CSF | 139  |
| 56514 | 79  | CSF exclusive    | CSF-N_190_IGM    | IGHV1-2  | CATGARGDSSGYDYFDYW       | IGHJ4 | CSF | 404  |
| 56514 | 80  | CSF exclusive    | CSF-N_190_IGM    | IGHV4-31 | CATRPWSHDAFDIW           | IGHJ3 | CSF | 1    |
| 56514 | 81  | Connecting to PB | CSF-N_190_IGM    | IGHV3-21 | CGRDFLTGHTAAGADYW        | IGHJ4 | CSF | 113  |
| 56514 | 81  | Connecting to PB | USM_89486_IGM    | IGHV3-21 | CGRDFLTSHIAAGADYW        | IGHJ4 | PB  | 1    |
| 56514 | 82  | CSF exclusive    | CSF-N_190_IGM    | IGHV3-72 | CTRADLPQYSSGDYW          | IGHJ4 | CSF | 98   |
| 56514 | 83  | CSF exclusive    | CSF-N_190_IGM    | IGHV4-59 | CVKENSQYVAYGLRWGVNVW     | IGHJ6 | CSF | 145  |
| 56514 | 84  | CSF exclusive    | CSF-N_190_IGM    | IGHV1-69 | RARTVVVGATTYYYYGMDVW     | IGHJ6 | CSF | 3    |
| 56514 | 85  | CSF exclusive    | CSF-SM_1022_IGG  | IGHV5-51 | CACLSSRWYDAFEIW          | IGHJ3 | CSF | 1    |
| 56514 | 85  | CSF exclusive    | CSF-SM_1022_IGG  | IGHV5-51 | CASPSSRWYDAFEIW          | IGHJ3 | CSF | 4    |
| 56514 | 86  | CSF exclusive    | CSF-SM_1022_IGG  | IGHV3-30 | CAKDWERRGSSSDYYYYGMDVW   | IGHJ6 | CSF | 1    |
| 56514 | 87  | CSF exclusive    | CSF-SM_1022_IGG  | IGHV3-30 | CAKDRGFIVVVPATISGMDVW    | IGHJ6 | CSF | 53   |
| 56514 | 88  | Connecting to PB | CSF-SM_1022_IGG  | IGHV3-30 | CAKDRGGRWLYNWFDPW        | IGHJ5 | CSF | 1    |
| 56514 | 88  | Connecting to PB | DN_35706_IGG     | IGHV3-30 | CAKDRGGRWLYNWFDPW        | IGHJ5 | PB  | 26   |
| 56514 | 89  | CSF exclusive    | CSF-SM_1022_IGG  | IGHV3-30 | CAKEIYNWIHQYYGMDVW       | IGHJ6 | CSF | 199  |
| 56514 | 90  | CSF exclusive    | CSF-SM_1022_IGG  | IGHV3-30 | CARAQMGKEYFYFYGMDVW      | IGHJ6 | CSF | 3    |
| 56514 | 91  | CSF exclusive    | CSF-SM_1022_IGG  | IGHV4-31 | CARATMVLSSVWFDPW         | IGHJ5 | CSF | 2    |
| 56514 | 92  | CSF exclusive    | CSF-SM_1022_IGG  | IGHV4-31 | CARDGLMNSPYWYFDLW        | IGHJ2 | CSF | 3    |
| 56514 | 93  | CSF exclusive    | CSF-SM_1022_IGG  | IGHV1-3  | CARDINYDDHRIDYW          | IGHJ4 | CSF | 1    |
| 56514 | 94  | Connecting to PB | CSF-SM_1022_IGG  | IGHV1-69 | CARDLRGPGLW              | IGHJ4 | CSF | 4266 |
| 56514 | 94  | Connecting to PB | CSF-SM_1022_IGG  | IGHV1-69 | CARDLRGPGVW              | IGHJ4 | CSF | 5694 |
| 56514 | 94  | Connecting to PB | SM_188264_IGG    | IGHV1-69 | CARDLRGPGVW              | IGHJ4 | PB  | 340  |
| 56514 | 95  | CSF exclusive    | CSF-SM_1022_IGG  | IGHV4-34 | CARDMFGWSAYNNPHYFDYW     | IGHJ4 | CSF | 70   |
| 56514 | 96  | CSF exclusive    | CSF-SM_1022_IGG  | IGHV4-59 | CARDPFMRWLVNPGAFDIW      | IGHJ3 | CSF | 429  |
| 56514 | 97  | Connecting to PB | CSF-SM_1022_IGG  | IGHV1-69 | CAREPARWEWLDPW           | IGHJ5 | CSF | 357  |
| 56514 | 97  | Connecting to PB | CSF-SM_1022_IGG  | IGHV1-69 | CARQPARWEDWLDPW          | IGHJ5 | CSF | 2081 |
| 56514 | 97  | Connecting to PB | SM_188264_IGG    | IGHV1-69 | CAGQPARWEDWLDPW          | IGHJ5 | PB  | 1    |
| 56514 | 97  | Connecting to PB | SM_188264_IGG    | IGHV1-69 | CARQPARWEDWLDPW          | IGHJ5 | PB  | 1    |
| 56514 | 97  | Connecting to PB | SM_188264_IGG    | IGHV1-69 | CARQPARWEDWLDPW          | IGHJ5 | PB  | 19   |
| 56514 | 97  | Connecting to PB | SM_188264_IGG    | IGHV1-69 | CAREPARWEWLDPW           | IGHJ5 | PB  | 77   |
| 56514 | 98  | Connecting to PB | CSF-SM_1022_IGG  | IGHV4-34 | CARGSSAHSWAYHYGMDVW      | IGHJ6 | CSF | 1    |
| 56514 | 98  | Connecting to PB | CSF-SM_1022_IGG  | IGHV4-34 | CARGSSAHSWAYHYGMDVW      | IGHJ6 | CSF | 16   |
| 56514 | 98  | Connecting to PB | SM_188264_IGG    | IGHV4-34 | CARGSSGHSQAYYYGMDVW      | IGHJ6 | PB  | 18   |
| 56514 | 99  | Connecting to PB | CSF-SM_1022_IGG  | IGHV2-70 | CARIPGVGRPFDDIC          | IGHJ3 | CSF | 1100 |
| 56514 | 99  | Connecting to PB | SM_188264_IGG    | IGHV2-70 | CARIPGVGRPFDDIC          | IGHJ3 | PB  | 195  |
| 56514 | 99  | Connecting to PB | DN_35706_IGG     | IGHV2-70 | CARIPGVGRPFDDIC          | IGHJ3 | PB  | 341  |
| 56514 | 100 | CSF exclusive    | CSF-SM_1022_IGG  | IGHV4-34 | CARIRDGHYENEFYFDYW       | IGHJ4 | CSF | 1    |
| 56514 | 101 | Connecting to PB | CSF-SM_1022_IGG  | IGHV5-51 | CARLPLTNINVRETDYW        | IGHJ4 | CSF | 78   |
| 56514 | 101 | Connecting to PB | SM_188264_IGG    | IGHV5-51 | CARLPLTNINVRETDYW        | IGHJ4 | PB  | 143  |
| 56514 | 102 | Connecting to PB | CSF-SM_1022_IGG  | IGHV6-1  | CARSLRITGTFKFDYW         | IGHJ4 | CSF | 11   |
| 56514 | 102 | Connecting to PB | SM_188264_IGG    | IGHV6-1  | CARSLRITGTFKFDYW         | IGHJ4 | PB  | 309  |
| 56514 | 103 | Connecting to PB | CSF-SM_1022_IGG  | IGHV4-31 | CARSTRYYRSGYLAFDSW       | IGHJ4 | CSF | 31   |
| 56514 | 103 | Connecting to PB | DN_35706_IGG     | IGHV4-31 | CARSTRYYRSGYLAFDSW       | IGHJ4 | PB  | 18   |
| 56514 | 103 | Connecting to PB | SM_188264_IGG    | IGHV4-31 | CARSTRYYRSGYLAFDSW       | IGHJ4 | PB  | 31   |
| 56514 | 104 | Connecting to PB | CSF-SM_1022_IGG  | IGHV4-31 | CARVAPTTKYYYAMDVW        | IGHJ6 | CSF | 383  |
| 56514 | 104 | Connecting to PB | PC_1001_IGG      | IGHV4-31 | CAGVAPTTKYYYAMDVW        | IGHJ6 | PB  | 1    |
| 56514 | 104 | Connecting to PB | SM_188264_IGG    | IGHV4-31 | CARVAPTTKYYYAMDVW        | IGHJ6 | PB  | 7    |
| 56514 | 105 | Connecting to PB | CSF-SM_1022_IGG  | IGHV4-59 | CASGEGHNLYW              | IGHJ4 | CSF | 1    |
| 56514 | 105 | Connecting to PB | SM_188264_IGG    | IGHV4-59 | CASGEGHNLYW              | IGHJ4 | PB  | 91   |
| 56514 | 106 | CSF exclusive    | CSF-SM_1022_IGG  | IGHV4-34 | CASLWVYDSSGYQHVGDYW      | IGHJ4 | CSF | 24   |
| 56514 | 107 | CSF exclusive    | CSF-SM_1022_IGG  | IGHV4-31 | CASNRYGGSGPLDAFHIW       | IGHJ3 | CSF | 1    |
| 56514 | 108 | Connecting to PB | CSF-SM_1022_IGG  | IGHV4-59 | CATDNSGPRDPDYW           | IGHJ4 | CSF | 1044 |
| 56514 | 108 | Connecting to PB | SM_188264_IGG    | IGHV4-59 | CATDNSGPRDPDYR           | IGHJ4 | PB  | 4    |
| 56514 | 109 | CSF exclusive    | CSF-SM_1022_IGG  | IGHV4-59 | CATDNSGPPSSQGPW          | IGHJ5 | CSF | 5    |
| 56514 | 110 | CSF exclusive    | CSF-SM_1022_IGG  | IGHV1-69 | CATVHHSRSSRGSEYW         | IGHJ4 | CSF | 1    |
| 56514 | 111 | CSF exclusive    | CSF-SM_1022_IGG  | IGHV2-70 | CSRSWGANGSFDWF           | IGHJ3 | CSF | 416  |
| 56514 | 112 | Connecting to PB | CSF-SM_1022_IGG  | IGHV5-51 | CTRHGGYISGREYDW          | IGHJ4 | CSF | 121  |
| 56514 | 112 | Connecting to PB | SM_188264_IGG    | IGHV5-51 | CTRHGGYISGREYDW          | IGHJ4 | PB  | 53   |
| 56514 | 113 | Connecting to PB | CSF-SM_1022_IGG  | IGHV4-34 | CVITDVKTLPLLYSGYDEMVFYDW | IGHJ4 | CSF | 15   |
| 56514 | 113 | Connecting to PB | SM_188264_IGG    | IGHV4-34 | CVITDVKTLPLLYSGYDEMVFYDW | IGHJ4 | PB  | 1    |
| 56514 | 114 | Connecting to PB | CSF-SM_1022_IGG  | IGHV3-23 | CVKSGDLYSISSSGYYYYGMDVW  | IGHJ6 | CSF | 152  |
| 56514 | 114 | Connecting to PB | SM_188264_IGG    | IGHV3-23 | CVKSGDLYSISSSGYYYYGMDVW  | IGHJ6 | PB  | 10   |

|       |     |                  |                  |          |                      |       |     |      |
|-------|-----|------------------|------------------|----------|----------------------|-------|-----|------|
| 56514 | 115 | Connecting to PB | CSF-SM_1022_IGG  | IGHV3-7  | CVRDEKWRDAVDIW       | IGHJ3 | CSF | 72   |
| 56514 | 115 | Connecting to PB | SM_188264_IGG    | IGHV3-7  | CVRDEKWRDTVDIW       | IGHJ3 | PB  | 23   |
| 56514 | 116 | CSF exclusive    | CSF-SM_1022_IGG  | IGHV4-59 | CVRVVLGEFDPW         | IGHJ5 | CSF | 1    |
| 56514 | 117 | Connecting to PB | CSF-USM_146_IGM  | IGHV2-5  | CAHKFNSEFDYW         | IGHJ4 | CSF | 313  |
| 56514 | 117 | Connecting to PB | USM_89486_IGM    | IGHV2-5  | CAHKFNSEFDYW         | IGHJ4 | PB  | 6    |
| 56514 | 118 | CSF exclusive    | CSF-USM_146_IGM  | IGHV3-30 | CAKATQGGYGGYPLHYW    | IGHJ4 | CSF | 358  |
| 56514 | 119 | CSF exclusive    | CSF-USM_146_IGM  | IGHV3-30 | CAKGRNTYLDTSAFDYW    | IGHJ4 | CSF | 3    |
| 56514 | 120 | Connecting to PB | CSF-USM_146_IGM  | IGHV3-7  | CARASKGAHDYW         | IGHJ4 | CSF | 1    |
| 56514 | 120 | Connecting to PB | Naive_290198_IGM | IGHV3-7  | CARASKGAHDYW         | IGHJ4 | PB  | 1    |
| 56514 | 121 | CSF exclusive    | CSF-USM_146_IGM  | IGHV3-21 | CARATKSVAVAGKDAFDIW  | IGHJ3 | CSF | 134  |
| 56514 | 122 | CSF exclusive    | CSF-USM_146_IGM  | IGHV3-74 | CARAYGNYPYFYGMVDVW   | IGHJ6 | CSF | 72   |
| 56514 | 123 | Connecting to PB | CSF-USM_146_IGM  | IGHV4-59 | CARAYTGDYWYDDLW      | IGHJ2 | CSF | 511  |
| 56514 | 123 | Connecting to PB | Naive_290198_IGM | IGHV4-59 | CARAYTGDYWYDDLW      | IGHJ2 | PB  | 1    |
| 56514 | 124 | CSF exclusive    | CSF-USM_146_IGM  | IGHV3-30 | CARDMNIAMAGRGYVDYW   | IGHJ4 | CSF | 446  |
| 56514 | 125 | Connecting to PB | CSF-USM_146_IGM  | IGHV4-59 | CARDRTKSWTSWAFDIW    | IGHJ3 | CSF | 1    |
| 56514 | 125 | Connecting to PB | Naive_290198_IGM | IGHV4-59 | CARDRTKSWTSWAFDIW    | IGHJ3 | PB  | 2    |
| 56514 | 126 | CSF exclusive    | CSF-USM_146_IGM  | IGHV1-3  | CAREDSGWYLDWC        | IGHJ4 | CSF | 10   |
| 56514 | 126 | CSF exclusive    | CSF-USM_146_IGM  | IGHV1-3  | CAREDSGWYFDYW        | IGHJ4 | CSF | 621  |
| 56514 | 127 | Connecting to PB | CSF-USM_146_IGM  | IGHV4-34 | CARENKGIQLWSNYGMVDVW | IGHJ6 | CSF | 543  |
| 56514 | 127 | Connecting to PB | USM_89486_IGM    | IGHV4-34 | CARENKGIQLWSNYGMVDVW | IGHJ6 | PB  | 1    |
| 56514 | 128 | Connecting to PB | CSF-USM_146_IGM  | IGHV1-69 | CARERSSSFYDW         | IGHJ4 | CSF | 1    |
| 56514 | 128 | Connecting to PB | Naive_290198_IGM | IGHV1-69 | CARERSSSFYDW         | IGHJ4 | PB  | 9    |
| 56514 | 129 | Connecting to PB | CSF-USM_146_IGM  | IGHV1-46 | CAREVSSVGMVDVW       | IGHJ6 | CSF | 2    |
| 56514 | 129 | Connecting to PB | SM_188264_IGM    | IGHV1-46 | CAREASSVGTVDW        | IGHJ6 | PB  | 1    |
| 56514 | 129 | Connecting to PB | SM_188264_IGM    | IGHV1-46 | CAREASSVGMVDVW       | IGHJ6 | PB  | 13   |
| 56514 | 129 | Connecting to PB | SM_188264_IGM    | IGHV1-46 | CAREVSSVGMVDVW       | IGHJ6 | PB  | 160  |
| 56514 | 129 | Connecting to PB | USM_89486_IGM    | IGHV1-46 | CAREVSSVGMVDVW       | IGHJ6 | PB  | 352  |
| 56514 | 130 | CSF exclusive    | CSF-USM_146_IGM  | IGHV4-59 | CARGFASTWYLDYW       | IGHJ4 | CSF | 4    |
| 56514 | 131 | Connecting to PB | CSF-USM_146_IGM  | IGHV3-23 | CARGRWLGRPTGYGMVDVW  | IGHJ6 | CSF | 356  |
| 56514 | 131 | Connecting to PB | USM_89486_IGM    | IGHV3-23 | CARGRWLGRPTGYGMVDVW  | IGHJ6 | PB  | 17   |
| 56514 | 132 | Connecting to PB | CSF-USM_146_IGM  | IGHV4-31 | CARGTGLLVPGLGWFPDW   | IGHJ5 | CSF | 35   |
| 56514 | 132 | Connecting to PB | USM_89486_IGM    | IGHV4-31 | CARGTGLLVPGLGWFPDW   | IGHJ5 | PB  | 9    |
| 56514 | 133 | Connecting to PB | CSF-USM_146_IGM  | IGHV5-51 | CARGYWFYDLW          | IGHJ2 | CSF | 46   |
| 56514 | 133 | Connecting to PB | Naive_290198_IGM | IGHV5-51 | CARGYWFYDLW          | IGHJ2 | PB  | 1    |
| 56514 | 133 | Connecting to PB | PC_1001_IGM      | IGHV5-51 | CARGYWFYDLW          | IGHJ2 | PB  | 1    |
| 56514 | 133 | Connecting to PB | USM_89486_IGM    | IGHV5-51 | CARGYWFYDLW          | IGHJ2 | PB  | 1    |
| 56514 | 133 | Connecting to PB | Naive_290198_IGM | IGHV5-51 | CARGRVYFDLW          | IGHJ2 | PB  | 4    |
| 56514 | 133 | Connecting to PB | USM_89486_IGM    | IGHV5-51 | CARGYWFYDLW          | IGHJ2 | PB  | 82   |
| 56514 | 134 | Connecting to PB | CSF-USM_146_IGM  | IGHV4-59 | CARHGRAYSSYYALDIW    | IGHJ3 | CSF | 2    |
| 56514 | 134 | Connecting to PB | CSF-USM_146_IGM  | IGHV4-59 | CARHGRAYSSYYALDIW    | IGHJ3 | CSF | 558  |
| 56514 | 134 | Connecting to PB | USM_89486_IGM    | IGHV4-59 | CARHGRAYSSYYALDIW    | IGHJ3 | PB  | 1    |
| 56514 | 135 | CSF exclusive    | CSF-USM_146_IGM  | IGHV4-39 | CARHLEWPIDYW         | IGHJ4 | CSF | 370  |
| 56514 | 136 | Connecting to PB | CSF-USM_146_IGM  | IGHV4-59 | CARIVGTTDAFDIW       | IGHJ3 | CSF | 1259 |
| 56514 | 136 | Connecting to PB | USM_89486_IGM    | IGHV4-59 | CATVVGASDAFDIW       | IGHJ3 | PB  | 33   |
| 56514 | 136 | Connecting to PB | USM_89486_IGM    | IGHV4-59 | CARVVGASDAFDLW       | IGHJ3 | PB  | 36   |
| 56514 | 136 | Connecting to PB | USM_89486_IGM    | IGHV4-59 | CARVVGATDAFDIW       | IGHJ3 | PB  | 376  |
| 56514 | 137 | CSF exclusive    | CSF-USM_146_IGM  | IGHV3-21 | CARNIPRDSNWFADYW     | IGHJ4 | CSF | 126  |
| 56514 | 138 | Connecting to PB | CSF-USM_146_IGM  | IGHV4-39 | CARPNSGGYDAFDIW      | IGHJ3 | CSF | 659  |
| 56514 | 138 | Connecting to PB | USM_89486_IGM    | IGHV4-39 | CARPYSGNYDAFDIW      | IGHJ3 | PB  | 12   |
| 56514 | 138 | Connecting to PB | USM_89486_IGM    | IGHV4-39 | CARPNSGGYDAFDIW      | IGHJ3 | PB  | 13   |
| 56514 | 138 | Connecting to PB | USM_89486_IGM    | IGHV4-39 | CARPYSGYDAFDIW       | IGHJ3 | PB  | 23   |
| 56514 | 139 | CSF exclusive    | CSF-USM_146_IGM  | IGHV1-18 | CATNYIDIDGYRPSKWFDPW | IGHJ5 | CSF | 599  |
| 56514 | 140 | CSF exclusive    | CSF-USM_146_IGM  | IGHV5-51 | CATSISSGWYWGYYW      | IGHJ4 | CSF | 140  |
| 56514 | 141 | CSF exclusive    | CSF-USM_146_IGM  | IGHV3-15 | CQVTPTLATHRGVFDIW    | IGHJ3 | CSF | 403  |
| 56514 | 142 | Connecting to PB | CSF-USM_146_IGM  | IGHV3-15 | CSSNSWGDYW           | IGHJ4 | CSF | 5    |
| 56514 | 142 | Connecting to PB | USM_89486_IGM    | IGHV3-15 | CSSNSWGDYW           | IGHJ4 | PB  | 8    |
| 56514 | 142 | Connecting to PB | USM_89486_IGM    | IGHV3-15 | CSTNSWGDYW           | IGHJ4 | PB  | 12   |
| 56514 | 143 | Connecting to PB | CSF-USM_146_IGM  | IGHV3-30 | CTRGRSSMFSDSW        | IGHJ5 | CSF | 29   |
| 56514 | 143 | Connecting to PB | USM_89486_IGM    | IGHV3-30 | CMRGRSSMFSDSW        | IGHJ5 | PB  | 3    |
| 56514 | 143 | Connecting to PB | USM_89486_IGM    | IGHV3-30 | CTRGRSSMFSDSW        | IGHJ5 | PB  | 6    |
| 56514 | 144 | Connecting to PB | CSF-USM_146_IGM  | IGHV3-73 | CTRLVDLAAAGYDYW      | IGHJ4 | CSF | 63   |
| 56514 | 144 | Connecting to PB | USM_89486_IGM    | IGHV3-73 | CTRLVDMAAGYDYW       | IGHJ4 | PB  | 1    |
| 56514 | 144 | Connecting to PB | USM_89486_IGM    | IGHV3-73 | CTRLVDIAAGYDYW       | IGHJ4 | PB  | 12   |
| 56514 | 145 | CSF exclusive    | CSF-USM_146_IGM  | IGHV3-15 | CTTLGQVVAANGYW       | IGHJ4 | CSF | 100  |
| 56514 | 146 | CSF exclusive    | CSF-USM_146_IGM  | IGHV3-64 | CVKAQNYDSWSSWDCW     | IGHJ4 | CSF | 1    |
| 56514 | 146 | CSF exclusive    | CSF-USM_146_IGM  | IGHV3-64 | CVKAQNYDSWSSWGCW     | IGHJ4 | CSF | 19   |
| 56514 | 147 | Connecting to PB | CSF-USM_146_IGM  | IGHV3-7  | CVRDCWGLPEGVDFDIW    | IGHJ3 | CSF | 280  |
| 56514 | 147 | Connecting to PB | USM_89486_IGM    | IGHV3-7  | CARDCWGLPEGIDGFDIW   | IGHJ3 | PB  | 1    |
| 56514 | 147 | Connecting to PB | USM_89486_IGM    | IGHV3-7  | CVRDCWGLPEGVDFDIW    | IGHJ3 | PB  | 1    |
| 56514 | 147 | Connecting to PB | USM_89486_IGM    | IGHV3-7  | CVRDCWGLPEGVDFDLW    | IGHJ3 | PB  | 1    |
| 56514 | 147 | Connecting to PB | USM_89486_IGM    | IGHV3-7  | CVKDNWGLPEGVDAFDVW   | IGHJ3 | PB  | 2    |
| 56514 | 147 | Connecting to PB | SM_188264_IGM    | IGHV3-7  | CVRDCWGLPEGIDGFDIW   | IGHJ3 | PB  | 3    |
| 56514 | 147 | Connecting to PB | USM_89486_IGM    | IGHV3-7  | CVKDNWGLPEGVDAFDIW   | IGHJ3 | PB  | 5    |
| 56514 | 147 | Connecting to PB | SM_188264_IGG    | IGHV3-7  | CARDCWGLPEGVDFDIW    | IGHJ3 | PB  | 9    |
| 56514 | 147 | Connecting to PB | USM_89486_IGM    | IGHV3-7  | CAKDNWGLPGGVDAFDIW   | IGHJ3 | PB  | 12   |
| 56514 | 147 | Connecting to PB | USM_89486_IGM    | IGHV3-7  | CARDCWGLPEGVDFDIW    | IGHJ3 | PB  | 19   |
| 56514 | 147 | Connecting to PB | SM_188264_IGM    | IGHV3-7  | CVKDNWGLPEGVDFDIW    | IGHJ3 | PB  | 21   |
| 56514 | 147 | Connecting to PB | SM_188264_IGM    | IGHV3-7  | CARDCWGLPEGVDFDIW    | IGHJ3 | PB  | 94   |
| 56514 | 148 | Connecting to PB | CSF-USM_146_IGM  | IGHV3-74 | CVRDVGAPPLDYW        | IGHJ4 | CSF | 277  |
| 56514 | 148 | Connecting to PB | USM_89486_IGM    | IGHV3-74 | CVRDVGAPPLDYW        | IGHJ4 | PB  | 1    |
| 56514 | 148 | Connecting to PB | SM_188264_IGG    | IGHV3-74 | CVRDVGAPPLDYW        | IGHJ4 | PB  | 17   |
| 56914 | 1   | Connecting to PB | CSF-DN_58_IGG    | IGHV4-59 | CAEGPYISGWYGAFDIW    | IGHJ3 | CSF | 171  |
| 56914 | 1   | Connecting to PB | DN_38934_IGG     | IGHV4-59 | CAKGPYSSGWYGAFHIW    | IGHJ3 | PB  | 2    |
| 56914 | 1   | Connecting to PB | DN_38934_IGG     | IGHV4-59 | CTEGPYISGWYGAFDIW    | IGHJ3 | PB  | 15   |
| 56914 | 1   | Connecting to PB | DN_38934_IGG     | IGHV4-59 | CAEGPYSSGWYGAFDIW    | IGHJ3 | PB  | 18   |

|       |    |                  |                  |          |                            |       |     |       |
|-------|----|------------------|------------------|----------|----------------------------|-------|-----|-------|
| 56914 | 1  | Connecting to PB | DN_38934_IGG     | IGHV4-59 | CAEGPYSSDWYGSFNIW          | IGHJ3 | PB  | 39    |
| 56914 | 1  | Connecting to PB | SM_125023_IGG    | IGHV4-59 | CAEGPYISGWYGFADVW          | IGHJ3 | PB  | 50    |
| 56914 | 1  | Connecting to PB | SM_125023_IGG    | IGHV4-59 | CAEGPYSSDWYGFADIW          | IGHJ3 | PB  | 67    |
| 56914 | 2  | CSF exclusive    | CSF-DN_58_IGG    | IGHV2-5  | CAIAVREGYDSSGYNGYFDFW      | IGHJ4 | CSF | 275   |
| 56914 | 3  | CSF exclusive    | CSF-DN_58_IGG    | IGHV1-8  | CARGLEEWFRKLRGRRIYFCYMDAW  | IGHJ6 | CSF | 1     |
| 56914 | 4  | Connecting to PB | CSF-SM_240_IGG   | IGHV1-8  | RAKGLEEWFRKLRGRRTYFYMDVW   | IGHJ6 | CSF | 1     |
| 56914 | 4  | Connecting to PB | CSF-DN_58_IGG    | IGHV1-8  | CARGLEEWFRKLRGRRTYFYMDVW   | IGHJ6 | CSF | 8600  |
| 56914 | 4  | Connecting to PB | CSF-SM_240_IGG   | IGHV1-8  | CARGLEEWFRKLRGRRTYFYMDVW   | IGHJ6 | CSF | 9585  |
| 56914 | 4  | Connecting to PB | SM_125023_IGG    | IGHV1-8  | CARGLEEWFRKLRGRRTYFYMDVW   | IGHJ6 | PB  | 23    |
| 56914 | 5  | CSF exclusive    | CSF-DN_58_IGG    | IGHV4-39 | CVRRAGYSSGWYDHR            | IGHJ5 | CSF | 1     |
| 56914 | 5  | CSF exclusive    | CSF-DN_58_IGG    | IGHV4-39 | CVRRAGYSSGWYDHW            | IGHJ5 | CSF | 14    |
| 56914 | 6  | Connecting to PB | CSF-PC_115_IGG   | IGHV4-34 | CAGLVDFLDAFDIW             | IGHJ3 | CSF | 14970 |
| 56914 | 6  | Connecting to PB | SM_125023_IGG    | IGHV4-34 | CAGLVDFLDAFDIW             | IGHJ3 | PB  | 51    |
| 56914 | 6  | Connecting to PB | DN_38934_IGG     | IGHV4-34 | CAGLVDFLDAFDIW             | IGHJ3 | PB  | 105   |
| 56914 | 7  | CSF exclusive    | CSF-PC_115_IGG   | IGHV2-5  | CAHLRITYGQTFDYW            | IGHJ4 | CSF | 60    |
| 56914 | 8  | CSF exclusive    | CSF-PC_115_IGG   | IGHV3-23 | CAKDVPRIVRPTNIDFW          | IGHJ4 | CSF | 1381  |
| 56914 | 9  | CSF exclusive    | CSF-PC_115_IGG   | IGHV3-30 | CAKDREYDWSGYSLSRDYYYYYGVVW | IGHJ6 | CSF | 6     |
| 56914 | 10 | CSF exclusive    | CSF-PC_115_IGG   | IGHV3-30 | CAKDREYDWSGYSLSRDYYYYYGVVW | IGHJ6 | CSF | 138   |
| 56914 | 11 | CSF exclusive    | CSF-PC_115_IGG   | IGHV4-59 | CARATLRSNYYYSMDVW          | IGHJ6 | CSF | 16    |
| 56914 | 12 | CSF exclusive    | CSF-SM_240_IGG   | IGHV3-11 | CARDEPRLIRGYFDSW           | IGHJ4 | CSF | 390   |
| 56914 | 12 | CSF exclusive    | CSF-PC_115_IGG   | IGHV3-11 | CARDEPRLIRGYFDSW           | IGHJ4 | CSF | 1335  |
| 56914 | 13 | CSF exclusive    | CSF-PC_115_IGG   | IGHV3-48 | CARDEQCLIRGFFDYW           | IGHJ4 | CSF | 1     |
| 56914 | 14 | CSF exclusive    | CSF-PC_115_IGG   | IGHV3-11 | CARDEQRLIRGFFDYW           | IGHJ4 | CSF | 14    |
| 56914 | 15 | Connecting to PB | CSF-PC_115_IGG   | IGHV4-59 | CARDSSGWLRYFDLW            | IGHJ2 | CSF | 5648  |
| 56914 | 15 | Connecting to PB | DN_38934_IGG     | IGHV4-59 | CARDSSGWLRYFDLW            | IGHJ2 | PB  | 138   |
| 56914 | 15 | Connecting to PB | SM_125023_IGG    | IGHV4-59 | CARDSSGWLRYFDLW            | IGHJ2 | PB  | 486   |
| 56914 | 16 | CSF exclusive    | CSF-PC_115_IGG   | IGHV3-21 | CARESSDFWSSGRNNWFDPW       | IGHJ5 | CSF | 149   |
| 56914 | 17 | Connecting to PB | CSF-PC_115_IGG   | IGHV4-4  | CARGPSSGWYGLDSW            | IGHJ4 | CSF | 1     |
| 56914 | 17 | Connecting to PB | PC_411_IGG       | IGHV4-4  | CAREPSSGWYDLDSW            | IGHJ4 | PB  | 1     |
| 56914 | 17 | Connecting to PB | DN_38934_IGG     | IGHV4-4  | CARGPSSGWYGLDSW            | IGHJ4 | PB  | 1     |
| 56914 | 17 | Connecting to PB | SM_125023_IGG    | IGHV4-4  | CARGPSSGWYGLDSW            | IGHJ4 | PB  | 3     |
| 56914 | 17 | Connecting to PB | PC_411_IGG       | IGHV4-4  | CARGPSSGWYGLDSW            | IGHJ4 | PB  | 12429 |
| 56914 | 18 | CSF exclusive    | CSF-PC_115_IGG   | IGHV4-34 | CARGRRYASGSYYPTQYPYNYLDVW  | IGHJ6 | CSF | 875   |
| 56914 | 19 | CSF exclusive    | CSF-PC_115_IGG   | IGHV4-34 | CARGRRYSSGGYYPTQYPYNYLDVW  | IGHJ3 | CSF | 1     |
| 56914 | 20 | CSF exclusive    | CSF-PC_115_IGG   | IGHV4-34 | CARGRRYSSGSYYPTQYPYNYLDVW  | IGHJ6 | CSF | 11    |
| 56914 | 21 | CSF exclusive    | CSF-PC_115_IGG   | IGHV2-70 | CARGRYPDNYYYYYLDVW         | IGHJ6 | CSF | 77    |
| 56914 | 22 | CSF exclusive    | CSF-PC_115_IGG   | IGHV2-70 | CARGRYPDNYYYYYLDVW         | IGHJ6 | CSF | 2092  |
| 56914 | 23 | Connecting to PB | CSF-PC_115_IGG   | IGHV4-59 | CARGSSYDSSGYPNWFDSW        | IGHJ5 | CSF | 2776  |
| 56914 | 23 | Connecting to PB | SM_125023_IGG    | IGHV4-59 | CARGSSYDSSGYPNWFDSW        | IGHJ5 | PB  | 171   |
| 56914 | 24 | Connecting to PB | CSF-PC_115_IGG   | IGHV6-1  | CARGYNSGHDYW               | IGHJ4 | CSF | 1     |
| 56914 | 24 | Connecting to PB | SM_125023_IGG    | IGHV6-1  | CVRGYNSGHDYC               | IGHJ4 | PB  | 1     |
| 56914 | 24 | Connecting to PB | SM_125023_IGG    | IGHV6-1  | CAGGYNSGHDYW               | IGHJ4 | PB  | 2     |
| 56914 | 24 | Connecting to PB | PC_411_IGM       | IGHV6-1  | CARGYNSGHDYW               | IGHJ4 | PB  | 6     |
| 56914 | 24 | Connecting to PB | PC_411_IGG       | IGHV6-1  | CARGYNLGHDIW               | IGHJ4 | PB  | 15    |
| 56914 | 24 | Connecting to PB | SM_125023_IGG    | IGHV6-1  | CARGAKSGFDYW               | IGHJ4 | PB  | 124   |
| 56914 | 24 | Connecting to PB | SM_125023_IGG    | IGHV6-1  | CARGINSGFYDYM              | IGHJ4 | PB  | 246   |
| 56914 | 24 | Connecting to PB | SM_125023_IGG    | IGHV6-1  | CARGYNSGHDYW               | IGHJ4 | PB  | 571   |
| 56914 | 24 | Connecting to PB | PC_411_IGG       | IGHV6-1  | CARGYNSGHDYW               | IGHJ4 | PB  | 39877 |
| 56914 | 25 | Connecting to PB | CSF-PC_115_IGG   | IGHV4-59 | CARHVGHFHGW                | IGHJ4 | CSF | 1     |
| 56914 | 25 | Connecting to PB | CSF-PC_115_IGG   | IGHV4-59 | CARHVGHFYDYM               | IGHJ4 | CSF | 460   |
| 56914 | 25 | Connecting to PB | DN_38934_IGG     | IGHV4-59 | CARGVGAFDFW                | IGHJ4 | PB  | 3     |
| 56914 | 25 | Connecting to PB | SM_125023_IGG    | IGHV4-59 | CARHVGFDYW                 | IGHJ4 | PB  | 11    |
| 56914 | 25 | Connecting to PB | USM_200000_IGM   | IGHV4-59 | CARWVGHFDFW                | IGHJ4 | PB  | 12    |
| 56914 | 26 | Connecting to PB | CSF-PC_115_IGG   | IGHV4-4  | CARRGIDWYFDLW              | IGHJ2 | CSF | 1     |
| 56914 | 26 | Connecting to PB | CSF-PC_115_IGG   | IGHV4-4  | CARRGNDWYFDLW              | IGHJ2 | CSF | 206   |
| 56914 | 26 | Connecting to PB | SM_125023_IGG    | IGHV4-4  | CARRGNDWYFDLW              | IGHJ2 | PB  | 1     |
| 56914 | 27 | CSF exclusive    | CSF-PC_115_IGG   | IGHV4-59 | CARRTYSGFSYFFDYW           | IGHJ2 | CSF | 1     |
| 56914 | 28 | CSF exclusive    | CSF-PC_115_IGG   | IGHV4-59 | CARRTYSGFSYFFDYW           | IGHJ4 | CSF | 1070  |
| 56914 | 29 | CSF exclusive    | CSF-PC_115_IGG   | IGHV1-46 | CARVWGRGAGRWRPWSW          | IGHJ5 | CSF | 567   |
| 56914 | 30 | Connecting to PB | CSF-PC_115_IGG   | IGHV4-39 | CASAYATTRYSDYW             | IGHJ4 | CSF | 1     |
| 56914 | 30 | Connecting to PB | CSF-PC_115_IGM   | IGHV4-39 | CASAYTTTWYSDYW             | IGHJ4 | CSF | 3     |
| 56914 | 30 | Connecting to PB | CSF-SM_240_IGG   | IGHV4-39 | CASAYTTTWYSDYW             | IGHJ4 | CSF | 482   |
| 56914 | 30 | Connecting to PB | CSF-PC_115_IGG   | IGHV4-39 | CASAYTTTWYSDYW             | IGHJ4 | CSF | 4512  |
| 56914 | 30 | Connecting to PB | DN_38934_IGG     | IGHV4-39 | CASAHTTTWYSDYW             | IGHJ4 | PB  | 1     |
| 56914 | 30 | Connecting to PB | SM_125023_IGG    | IGHV4-39 | CASAYTTTWYSDYW             | IGHJ4 | PB  | 20    |
| 56914 | 31 | Connecting to PB | CSF-SM_240_IGG   | IGHV1-3  | CASNYGDVDYW                | IGHJ4 | CSF | 1     |
| 56914 | 31 | Connecting to PB | CSF-PC_115_IGM   | IGHV1-3  | CASNYGDVDYW                | IGHJ4 | CSF | 4     |
| 56914 | 31 | Connecting to PB | CSF-PC_115_IGG   | IGHV1-3  | CASNYGDVDYW                | IGHJ4 | CSF | 261   |
| 56914 | 31 | Connecting to PB | Naive_140638_IGM | IGHV1-3  | CATDYGDQDYW                | IGHJ4 | PB  | 2     |
| 56914 | 31 | Connecting to PB | USM_200000_IGM   | IGHV1-3  | CATNNGDQDCW                | IGHJ4 | PB  | 2     |
| 56914 | 31 | Connecting to PB | USM_200000_IGM   | IGHV1-3  | CASDNGDQDCW                | IGHJ4 | PB  | 4     |
| 56914 | 31 | Connecting to PB | USM_200000_IGM   | IGHV1-3  | CASDYGDRCW                 | IGHJ4 | PB  | 14    |
| 56914 | 31 | Connecting to PB | USM_200000_IGM   | IGHV1-3  | CASDYGDQDYW                | IGHJ4 | PB  | 16    |
| 56914 | 31 | Connecting to PB | SM_125023_IGG    | IGHV1-3  | CASNYGDVDYW                | IGHJ4 | PB  | 142   |
| 56914 | 32 | Connecting to PB | CSF-PC_115_IGG   | IGHV4-31 | CAVLWSEYSGYYIDYW           | IGHJ4 | CSF | 1     |
| 56914 | 32 | Connecting to PB | DN_38934_IGG     | IGHV4-31 | CAVLWSEYSGYYIDYW           | IGHJ4 | PB  | 113   |
| 56914 | 33 | CSF exclusive    | CSF-PC_115_IGG   | IGHV5-51 | CGRHTGWSSDHYYMDVW          | IGHJ6 | CSF | 3     |
| 56914 | 34 | CSF exclusive    | CSF-PC_115_IGG   | IGHV1-8  | YSRVDHWHTERAFGVW           | IGHJ3 | CSF | 1     |
| 56914 | 34 | CSF exclusive    | CSF-PC_115_IGG   | IGHV1-8  | CSRVDHWHTERAFGVW           | IGHJ3 | CSF | 5     |
| 56914 | 35 | CSF exclusive    | CSF-PC_115_IGG   | IGHV3-49 | CTRPVNDPWSYDYSVSGASDSW     | IGHJ4 | CSF | 170   |
| 56914 | 36 | CSF exclusive    | CSF-PC_115_IGG   | IGHV2-5  | CVHSRDLRLGLLYRFDPW         | IGHJ5 | CSF | 1717  |
| 56914 | 37 | CSF exclusive    | CSF-PC_115_IGM   | IGHV1-2  | CARDQWHAYDYW               | IGHJ4 | CSF | 62    |
| 56914 | 38 | CSF exclusive    | CSF-PC_115_IGM   | IGHV2-5  | CARTVPLSTWEPQGPLAYW        | IGHJ4 | CSF | 1     |
| 56914 | 39 | CSF exclusive    | CSF-SM_240_IGG   | IGHV2-5  | CAHRPRGDISSWFGRAYFDYW      | IGHJ4 | CSF | 42    |
| 56914 | 40 | CSF exclusive    | CSF-SM_240_IGG   | IGHV3-30 | CAKNDTGWAFDCW              | IGHJ4 | CSF | 23    |



|       |    |                  |                  |          |                          |       |     |       |
|-------|----|------------------|------------------|----------|--------------------------|-------|-----|-------|
| 56914 | 41 | CSF exclusive    | CSF-SM_240_IGG   | IGHV3-23 | CAKDRQGTGTANWFDPW        | IGHJ5 | CSF | 54    |
| 56914 | 42 | CSF exclusive    | CSF-SM_240_IGG   | IGHV3-30 | CAKENGYVTGSYYTKNYYYGMDVW | IGHJ6 | CSF | 17    |
| 56914 | 43 | CSF exclusive    | CSF-SM_240_IGG   | IGHV3-43 | CANNWRDMDRYYYYYMDVW      | IGHJ6 | CSF | 29    |
| 56914 | 44 | CSF exclusive    | CSF-SM_240_IGG   | IGHV1-2  | CARDGEILWFGESSRFDYW      | IGHJ4 | CSF | 287   |
| 56914 | 45 | CSF exclusive    | CSF-SM_240_IGG   | IGHV4-34 | CARGGVYYAMDVW            | IGHJ6 | CSF | 70    |
| 56914 | 46 | CSF exclusive    | CSF-SM_240_IGG   | IGHV1-8  | CARGLEEFKRLGRTYFYFMDVW   | IGHJ6 | CSF | 1     |
| 56914 | 47 | CSF exclusive    | CSF-SM_240_IGG   | IGHV3-21 | CARQIILTDADFVW           | IGHJ3 | CSF | 6     |
| 56914 | 48 | CSF exclusive    | CSF-SM_240_IGG   | IGHV3-30 | CARSLNPHYDFWRVLDVW       | IGHJ6 | CSF | 3     |
| 56914 | 49 | CSF exclusive    | CSF-USM_183_IGM  | IGHV4-39 | CAGRDSVLVVPVFL           | IGHJ5 | CSF | 500   |
| 56914 | 50 | CSF exclusive    | CSF-USM_183_IGM  | IGHV2-5  | CAHRPVGNSGYGGLHYFDYW     | IGHJ4 | CSF | 450   |
| 56914 | 51 | CSF exclusive    | CSF-USM_183_IGM  | IGHV2-5  | CAHSTVVAGYFDYW           | IGHJ4 | CSF | 898   |
| 56914 | 52 | CSF exclusive    | CSF-USM_183_IGM  | IGHV3-9  | CAKDPYSSGQSGWFDPW        | IGHJ5 | CSF | 121   |
| 56914 | 53 | CSF exclusive    | CSF-USM_183_IGM  | IGHV3-43 | CAKGRGGANSDALDIW         | IGHJ3 | CSF | 71    |
| 56914 | 54 | CSF exclusive    | CSF-USM_183_IGM  | IGHV3-23 | CAKVVRSWYSGAFDVG         | IGHJ3 | CSF | 28    |
| 56914 | 55 | CSF exclusive    | CSF-USM_183_IGM  | IGHV6-1  | CARDITSLDIW              | IGHJ4 | CSF | 708   |
| 56914 | 56 | CSF exclusive    | CSF-USM_183_IGM  | IGHV3-23 | CARDPVDGNWFDPW           | IGHJ5 | CSF | 39    |
| 56914 | 57 | Connecting to PB | CSF-USM_183_IGM  | IGHV1-2  | CARDYYGDYSARDW           | IGHJ4 | CSF | 439   |
| 56914 | 57 | Connecting to PB | USM_200000_IGM   | IGHV1-2  | CARDKYGDYSARDW           | IGHJ4 | PB  | 4     |
| 56914 | 58 | CSF exclusive    | CSF-USM_183_IGM  | IGHV4-59 | CARGDSSSANVDYW           | IGHJ4 | CSF | 125   |
| 56914 | 59 | CSF exclusive    | CSF-USM_183_IGM  | IGHV7-81 | CARGDYGTGGSYFNYW         | IGHJ4 | CSF | 80    |
| 56914 | 60 | CSF exclusive    | CSF-USM_183_IGM  | IGHV4-34 | CARGLGRRLSTYYYYYGMVW     | IGHJ6 | CSF | 78    |
| 56914 | 61 | CSF exclusive    | CSF-USM_183_IGM  | IGHV3-11 | CARGRGCSCGGRCYELNYW      | IGHJ4 | CSF | 1     |
| 56914 | 61 | CSF exclusive    | CSF-USM_183_IGM  | IGHV3-11 | CARGRGCSCGGRCYGLNYW      | IGHJ4 | CSF | 127   |
| 56914 | 62 | Connecting to PB | CSF-USM_183_IGM  | IGHV5-51 | CARGTGEAGGAGVYFDIW       | IGHJ4 | CSF | 26    |
| 56914 | 62 | Connecting to PB | Naive_140638_IGM | IGHV5-51 | CARGTGEAGGAGVYFDIW       | IGHJ4 | PB  | 4     |
| 56914 | 62 | Connecting to PB | USM_200000_IGM   | IGHV5-51 | CARGTGEAGGAGVYFDIW       | IGHJ4 | PB  | 9     |
| 56914 | 63 | CSF exclusive    | CSF-USM_183_IGM  | IGHV3-53 | CARGVAAAGSFYLDYW         | IGHJ4 | CSF | 38    |
| 56914 | 64 | Connecting to PB | CSF-USM_183_IGM  | IGHV4-59 | CARRDCGTSSW              | IGHJ5 | CSF | 1     |
| 56914 | 64 | Connecting to PB | CSF-USM_183_IGM  | IGHV4-59 | CARHDYGTSSW              | IGHJ5 | CSF | 485   |
| 56914 | 64 | Connecting to PB | USM_200000_IGM   | IGHV4-59 | CARHDYGTSSW              | IGHJ5 | PB  | 5     |
| 56914 | 65 | CSF exclusive    | CSF-USM_183_IGM  | IGHV3-11 | CARHKIQRSVDYW            | IGHJ4 | CSF | 161   |
| 56914 | 66 | Connecting to PB | CSF-USM_183_IGM  | IGHV4-39 | CARHPGWDIGVPIEDSW        | IGHJ5 | CSF | 144   |
| 56914 | 66 | Connecting to PB | USM_200000_IGM   | IGHV4-39 | CARHPGWDIGVPIEDSW        | IGHJ5 | PB  | 13    |
| 56914 | 67 | Connecting to PB | CSF-USM_183_IGM  | IGHV2-70 | CARISRVDYGGGVLVDYW       | IGHJ4 | CSF | 112   |
| 56914 | 67 | Connecting to PB | USM_200000_IGM   | IGHV2-70 | CARISRVDYGGGVLVDYW       | IGHJ4 | PB  | 7     |
| 56914 | 67 | Connecting to PB | USM_200000_IGM   | IGHV2-70 | CARISRVDYGGGGLLDYW       | IGHJ4 | PB  | 8     |
| 56914 | 68 | CSF exclusive    | CSF-USM_183_IGM  | IGHV3-30 | CARKTDTTVPGYW            | IGHJ4 | CSF | 32    |
| 56914 | 69 | Connecting to PB | CSF-USM_183_IGM  | IGHV4-4  | CARLSQAASFTYHYLDIW       | IGHJ6 | CSF | 27    |
| 56914 | 69 | Connecting to PB | CSF-USM_183_IGM  | IGHV4-4  | CARLSQAALSFTYHYLDVW      | IGHJ6 | CSF | 280   |
| 56914 | 69 | Connecting to PB | USM_200000_IGM   | IGHV4-4  | CARLSQAALSFTYHYLDVW      | IGHJ6 | PB  | 19    |
| 56914 | 70 | CSF exclusive    | CSF-USM_183_IGM  | IGHV4-4  | CARLTPAALSFPYHYLDVW      | IGHJ6 | CSF | 450   |
| 56914 | 71 | CSF exclusive    | CSF-USM_183_IGM  | IGHV3-23 | CARQAFTGSRRLDSW          | IGHJ5 | CSF | 73    |
| 56914 | 72 | Connecting to PB | CSF-USM_183_IGM  | IGHV6-1  | CARRGVQGVLDYW            | IGHJ4 | CSF | 2012  |
| 56914 | 72 | Connecting to PB | USM_200000_IGM   | IGHV6-1  | RARRGVQGVLDYW            | IGHJ4 | PB  | 1     |
| 56914 | 72 | Connecting to PB | USM_200000_IGM   | IGHV6-1  | CARRGVQGVLDYW            | IGHJ4 | PB  | 174   |
| 56914 | 73 | CSF exclusive    | CSF-USM_183_IGM  | IGHV4-31 | CARRVVVRANDAFDIW         | IGHJ3 | CSF | 425   |
| 56914 | 74 | CSF exclusive    | CSF-USM_183_IGM  | IGHV3-7  | CARSIGTAGSSW             | IGHJ5 | CSF | 181   |
| 56914 | 75 | CSF exclusive    | CSF-USM_183_IGM  | IGHV6-1  | CARVTNAYFDYW             | IGHJ4 | CSF | 1400  |
| 56914 | 76 | CSF exclusive    | CSF-USM_183_IGM  | IGHV3-11 | CASGYNGPFEYW             | IGHJ4 | CSF | 36    |
| 56914 | 77 | CSF exclusive    | CSF-USM_183_IGM  | IGHV1-18 | CASTSGSYSQDAFDIW         | IGHJ3 | CSF | 78    |
| 56914 | 78 | CSF exclusive    | CSF-USM_183_IGM  | IGHV3-23 | CATADWFLTNPMDVW          | IGHJ6 | CSF | 28    |
| 56914 | 79 | CSF exclusive    | CSF-USM_183_IGM  | IGHV3-66 | CTRDLSTDATYSSGSGSYSLAYW  | IGHJ4 | CSF | 16    |
| 56914 | 80 | CSF exclusive    | CSF-USM_183_IGM  | IGHV3-7  | CVRDGGWSRSRW             | IGHJ4 | CSF | 223   |
| 56914 | 81 | CSF exclusive    | CSF-USM_183_IGM  | IGHV3-53 | CVRQEYSNDRGYHYHYMDVW     | IGHJ6 | CSF | 29    |
| 57114 | 1  | CSF exclusive    | CSF-DN_39_IGG    | IGHV3-30 | CAGGEVIDYW               | IGHJ4 | CSF | 14    |
| 57114 | 2  | CSF exclusive    | CSF-DN_39_IGG    | IGHV3-13 | CARDLQYSGYDLW            | IGHJ5 | CSF | 2316  |
| 57114 | 3  | Connecting to PB | CSF-PC_15_IGG    | IGHV6-1  | CARDDDSSGNSLDYW          | IGHJ4 | CSF | 1     |
| 57114 | 3  | Connecting to PB | SM_132949_IGG    | IGHV6-1  | CARDDDSSGNSLDYW          | IGHJ4 | PB  | 1     |
| 57114 | 3  | Connecting to PB | DN_33437_IGG     | IGHV6-1  | CARDDDSSGNSLDYW          | IGHJ4 | PB  | 2     |
| 57114 | 3  | Connecting to PB | DN_33437_IGG     | IGHV6-1  | CARDDDSSGNSLDYW          | IGHJ4 | PB  | 1378  |
| 57114 | 4  | CSF exclusive    | CSF-PC_15_IGG    | IGHV3-30 | CARDGNVGLDMMSFHFDW       | IGHJ4 | CSF | 1062  |
| 57114 | 5  | Connecting to PB | CSF-PC_15_IGG    | IGHV3-11 | CARDQVLAGTALDYW          | IGHJ4 | CSF | 1     |
| 57114 | 5  | Connecting to PB | SM_132949_IGG    | IGHV3-11 | CARDQVLAGTALDYW          | IGHJ4 | PB  | 11    |
| 57114 | 5  | Connecting to PB | PC_854_IGG       | IGHV3-11 | CARDQVLAGTALDYW          | IGHJ4 | PB  | 9166  |
| 57114 | 6  | CSF exclusive    | CSF-PC_15_IGG    | IGHV4-59 | CARDRGMVGGHFYYLDVW       | IGHJ6 | CSF | 14    |
| 57114 | 7  | Connecting to PB | CSF-PC_15_IGG    | IGHV4-59 | CARDRGMVGGHFYYLDVW       | IGHJ6 | CSF | 5373  |
| 57114 | 7  | Connecting to PB | PC_854_IGG       | IGHV4-59 | CARDRGMVGGHFYYLDVW       | IGHJ6 | PB  | 3     |
| 57114 | 7  | Connecting to PB | SM_132949_IGG    | IGHV4-59 | CARDRGMVGGHFYYLDVW       | IGHJ6 | PB  | 3     |
| 57114 | 8  | Connecting to PB | CSF-PC_15_IGG    | IGHV4-4  | CARDVTMSLW               | IGHJ4 | CSF | 1     |
| 57114 | 8  | Connecting to PB | DN_33437_IGG     | IGHV4-4  | CARDVTMSLW               | IGHJ4 | PB  | 2     |
| 57114 | 8  | Connecting to PB | PC_854_IGM       | IGHV4-4  | CARDVTMSLW               | IGHJ4 | PB  | 7     |
| 57114 | 8  | Connecting to PB | SM_132949_IGG    | IGHV4-4  | CARDVTMSLW               | IGHJ4 | PB  | 67    |
| 57114 | 8  | Connecting to PB | PC_854_IGG       | IGHV4-4  | CARDVTMSLW               | IGHJ4 | PB  | 29164 |
| 57114 | 9  | CSF exclusive    | CSF-PC_15_IGG    | IGHV4-34 | CAREVVGSTYFDSW           | IGHJ4 | CSF | 26547 |
| 57114 | 10 | Connecting to PB | CSF-PC_15_IGG    | IGHV4-28 | CAREVVGSTYLDNR           | IGHJ4 | CSF | 51    |
| 57114 | 10 | Connecting to PB | DN_33437_IGG     | IGHV4-28 | CAREVVGSTYFDLW           | IGHJ4 | PB  | 3     |
| 57114 | 10 | Connecting to PB | SM_132949_IGG    | IGHV4-28 | CAREVVGSTYFDSW           | IGHJ4 | PB  | 223   |
| 57114 | 11 | CSF exclusive    | CSF-PC_15_IGG    | IGHV4-34 | CARGGKDSALLWGRYYYYYMDVW  | IGHJ6 | CSF | 4238  |
| 57114 | 12 | Connecting to PB | CSF-PC_15_IGG    | IGHV1-18 | CARGHIAARPPSLNYHFYMDVW   | IGHJ6 | CSF | 1     |
| 57114 | 12 | Connecting to PB | CSF-PC_15_IGG    | IGHV1-18 | CARGHIAVRPPSLNYCFYMDVW   | IGHJ6 | CSF | 1     |
| 57114 | 12 | Connecting to PB | CSF-SM_69_IGG    | IGHV1-18 | CARGHIAARPPSLNYFYMDVW    | IGHJ6 | CSF | 17    |
| 57114 | 12 | Connecting to PB | CSF-PC_15_IGG    | IGHV1-18 | CARGHIAARPPSLNYFYMDVW    | IGHJ6 | CSF | 92766 |
| 57114 | 12 | Connecting to PB | SM_132949_IGG    | IGHV1-18 | CARGHIAARPPSLNYFYMDVW    | IGHJ6 | PB  | 4     |
| 57114 | 12 | Connecting to PB | PC_854_IGG       | IGHV1-18 | CARGHIAARPPSLNYFYMDVW    | IGHJ6 | PB  | 9     |
| 57114 | 13 | CSF exclusive    | CSF-PC_15_IGG    | IGHV1-18 | CARGHIAATFSLNYFYMDVW     | IGHJ6 | CSF | 1     |

|       |    |                  |                  |          |                            |       |     |       |
|-------|----|------------------|------------------|----------|----------------------------|-------|-----|-------|
| 57114 | 14 | CSF exclusive    | CSF-PC_15_IGG    | IGHV1-18 | CARGHIVARPFPLNYFYTDVW      | IGHJ6 | CSF | 1     |
| 57114 | 15 | CSF exclusive    | CSF-PC_15_IGG    | IGHV2-70 | CARLRRSGDYIYRPFPGYQYLGMDVW | IGHJ6 | CSF | 1     |
| 57114 | 16 | CSF exclusive    | CSF-PC_15_IGG    | IGHV2-5  | CARMRRSGDYIYRPFPGYQYFGTVDW | IGHJ6 | CSF | 1     |
| 57114 | 17 | Connecting to PB | CSF-PC_15_IGG    | IGHV2-70 | CARMRRSGDYIYRPFPGYQYFGMDVW | IGHJ6 | CSF | 32330 |
| 57114 | 17 | Connecting to PB | PC_854_IGG       | IGHV2-70 | CARMRRSGDYIYRPFPGYQYFGMDVW | IGHJ6 | PB  | 2     |
| 57114 | 17 | Connecting to PB | SM_132949_IGG    | IGHV2-70 | CARMRRSGDYIYRPFPGYQYFGMDVW | IGHJ6 | PB  | 25    |
| 57114 | 18 | Connecting to PB | CSF-PC_15_IGG    | IGHV3-74 | CARSGGVLW                  | IGHJ5 | CSF | 2     |
| 57114 | 18 | Connecting to PB | CSF-SM_69_IGG    | IGHV3-74 | CAESGGVLW                  | IGHJ5 | CSF | 4     |
| 57114 | 18 | Connecting to PB | SM_132949_IGG    | IGHV3-74 | CARSGGVLW                  | IGHJ5 | PB  | 16    |
| 57114 | 19 | CSF exclusive    | CSF-PC_15_IGG    | IGHV3-11 | CARVALRPFNSDFWSGYDTQYFDYW  | IGHJ4 | CSF | 127   |
| 57114 | 20 | Connecting to PB | CSF-SM_69_IGG    | IGHV4-34 | CAKPHDFGDYWFYFDLW          | IGHJ2 | CSF | 1     |
| 57114 | 20 | Connecting to PB | SM_132949_IGG    | IGHV4-34 | CAKPHDFGDYWFYFDLW          | IGHJ2 | PB  | 12    |
| 57114 | 20 | Connecting to PB | PC_854_IGG       | IGHV4-34 | CAKPHDFGDYWFYFDLW          | IGHJ2 | PB  | 24325 |
| 57114 | 21 | CSF exclusive    | CSF-SM_69_IGG    | IGHV1-18 | CARDDFWHGFLDYW             | IGHJ4 | CSF | 26    |
| 57114 | 22 | CSF exclusive    | CSF-SM_69_IGG    | IGHV1-2  | CARDDFWHGLFDYW             | IGHJ4 | CSF | 18    |
| 57114 | 22 | CSF exclusive    | CSF-SM_69_IGG    | IGHV1-2  | CARDDFWHGSFDYW             | IGHJ4 | CSF | 147   |
| 57114 | 23 | Connecting to PB | CSF-SM_69_IGG    | IGHV6-1  | CARDLPRTHAFDMW             | IGHJ3 | CSF | 15    |
| 57114 | 23 | Connecting to PB | CSF-SM_69_IGM    | IGHV6-1  | CARDLPRTHAFDMW             | IGHJ3 | CSF | 5360  |
| 57114 | 23 | Connecting to PB | Naive_200000_IGM | IGHV6-1  | CARDLPRTHAFDIW             | IGHJ3 | PB  | 2     |
| 57114 | 23 | Connecting to PB | USM_200000_IGM   | IGHV6-1  | CARDLPRTHAFDMW             | IGHJ3 | PB  | 37    |
| 57114 | 24 | CSF exclusive    | CSF-SM_69_IGG    | IGHV4-4  | CARDPSYCDGGGSCYDKPYYGIDVW  | IGHJ6 | CSF | 7     |
| 57114 | 25 | Connecting to PB | CSF-SM_69_IGG    | IGHV4-4  | CARDPSYCDGGGSCYDKPYYGIDVW  | IGHJ6 | CSF | 983   |
| 57114 | 25 | Connecting to PB | SM_132949_IGG    | IGHV4-4  | CARDPSYCDGGGSCYDKPYYGIDVW  | IGHJ6 | PB  | 9     |
| 57114 | 26 | Connecting to PB | CSF-SM_69_IGG    | IGHV1-18 | CARDRGYDTRLFDYW            | IGHJ4 | CSF | 10189 |
| 57114 | 26 | Connecting to PB | DN_33437_IGG     | IGHV1-18 | CARDWGYDTRLFDYW            | IGHJ4 | PB  | 1     |
| 57114 | 27 | Connecting to PB | CSF-SM_69_IGG    | IGHV3-21 | CAREGVGANGNDAFDIW          | IGHJ3 | CSF | 8871  |
| 57114 | 27 | Connecting to PB | SM_132949_IGG    | IGHV3-21 | CAREGVGANGNDAFDIW          | IGHJ3 | PB  | 1     |
| 57114 | 27 | Connecting to PB | SM_132949_IGM    | IGHV3-21 | CVREGVGASGNDAFDIW          | IGHJ3 | PB  | 2     |
| 57114 | 28 | CSF exclusive    | CSF-SM_69_IGG    | IGHV1-3  | CARGCSGGCGWYMDVW           | IGHJ6 | CSF | 719   |
| 57114 | 29 | CSF exclusive    | CSF-SM_69_IGG    | IGHV3-30 | CARGIVGPTYYYAMVW           | IGHJ6 | CSF | 684   |
| 57114 | 30 | CSF exclusive    | CSF-SM_69_IGG    | IGHV4-4  | CARGPEPYCSSSTCYDVHVDYW     | IGHJ4 | CSF | 3569  |
| 57114 | 31 | CSF exclusive    | CSF-SM_69_IGG    | IGHV2-70 | CARDLWEPDTGGYEGWFDPW       | IGHJ5 | CSF | 2088  |
| 57114 | 32 | CSF exclusive    | CSF-SM_69_IGG    | IGHV1-69 | CARNVLRFLLEGKPTYYCGMDVW    | IGHJ6 | CSF | 3824  |
| 57114 | 33 | CSF exclusive    | CSF-SM_69_IGG    | IGHV3-21 | CARPSSGSGIDGMDVW           | IGHJ6 | CSF | 155   |
| 57114 | 33 | CSF exclusive    | CSF-SM_69_IGM    | IGHV3-21 | CARPSSGSGIDGMDVW           | IGHJ6 | CSF | 1969  |
| 57114 | 34 | Connecting to PB | CSF-SM_69_IGG    | IGHV4-34 | CARRTNAFDIW                | IGHJ3 | CSF | 2772  |
| 57114 | 34 | Connecting to PB | SM_132949_IGG    | IGHV4-34 | CARRNNAFDIW                | IGHJ3 | PB  | 364   |
| 57114 | 35 | CSF exclusive    | CSF-SM_69_IGG    | IGHV3-74 | CARSGGVLW                  | IGHJ4 | CSF | 1632  |
| 57114 | 36 | CSF exclusive    | CSF-SM_69_IGG    | IGHV3-48 | CARVRTNWNWAFDPW            | IGHJ5 | CSF | 464   |
| 57114 | 37 | CSF exclusive    | CSF-SM_69_IGG    | IGHV3-21 | CASKQWVDYFYMDVW            | IGHJ6 | CSF | 1116  |
| 57114 | 38 | Connecting to PB | CSF-SM_69_IGM    | IGHV3-7  | CGRDRGDTMTMTW              | IGHJ5 | CSF | 1     |
| 57114 | 38 | Connecting to PB | CSF-SM_69_IGM    | IGHV3-7  | RGRDRGDTVTMTW              | IGHJ5 | CSF | 1     |
| 57114 | 38 | Connecting to PB | CSF-SM_69_IGG    | IGHV3-7  | CGRDRGDTVTMTW              | IGHJ5 | CSF | 33    |
| 57114 | 38 | Connecting to PB | CSF-SM_69_IGM    | IGHV3-7  | CGRDRGDTVTMTW              | IGHJ5 | CSF | 39    |
| 57114 | 38 | Connecting to PB | USM_200000_IGM   | IGHV3-7  | CARDRGYTATTTW              | IGHJ5 | PB  | 1     |
| 57114 | 38 | Connecting to PB | DN_33437_IGM     | IGHV3-7  | CTRDRYNTSTAW               | IGHJ5 | PB  | 1     |
| 57114 | 38 | Connecting to PB | USM_200000_IGM   | IGHV3-7  | CARDRGNTATTTW              | IGHJ5 | PB  | 2     |
| 57114 | 38 | Connecting to PB | USM_200000_IGM   | IGHV3-7  | CARDRGNTVTLTW              | IGHJ5 | PB  | 2     |
| 57114 | 38 | Connecting to PB | USM_200000_IGM   | IGHV3-7  | CGKDRGDTVTMTW              | IGHJ5 | PB  | 2     |
| 57114 | 38 | Connecting to PB | Naive_200000_IGM | IGHV3-7  | CGRDRGNTVTTTW              | IGHJ5 | PB  | 2     |
| 57114 | 38 | Connecting to PB | USM_200000_IGM   | IGHV3-7  | CTRDRGNTTMTW               | IGHJ5 | PB  | 2     |
| 57114 | 38 | Connecting to PB | USM_200000_IGM   | IGHV3-7  | CARERGNTATMTW              | IGHJ5 | PB  | 4     |
| 57114 | 38 | Connecting to PB | USM_200000_IGM   | IGHV3-7  | CTRDRGNTATLTW              | IGHJ5 | PB  | 4     |
| 57114 | 38 | Connecting to PB | USM_200000_IGM   | IGHV3-7  | CTRDRGNTATPTW              | IGHJ5 | PB  | 4     |
| 57114 | 38 | Connecting to PB | USM_200000_IGM   | IGHV3-7  | CTRDRGNTATTAW              | IGHJ5 | PB  | 4     |
| 57114 | 38 | Connecting to PB | SM_132949_IGM    | IGHV3-7  | CTRDRGNTVSTTW              | IGHJ5 | PB  | 4     |
| 57114 | 38 | Connecting to PB | USM_200000_IGM   | IGHV3-7  | CTRDRGNTVTTTW              | IGHJ5 | PB  | 4     |
| 57114 | 38 | Connecting to PB | USM_200000_IGM   | IGHV3-7  | CTKDRGNTATTTW              | IGHJ5 | PB  | 5     |
| 57114 | 38 | Connecting to PB | USM_200000_IGM   | IGHV3-7  | CARERGNTATTTW              | IGHJ5 | PB  | 6     |
| 57114 | 38 | Connecting to PB | USM_200000_IGM   | IGHV3-7  | CTKDRGNTATTTW              | IGHJ5 | PB  | 7     |
| 57114 | 38 | Connecting to PB | USM_200000_IGM   | IGHV3-7  | CTKDRGNTLTTTW              | IGHJ5 | PB  | 7     |
| 57114 | 38 | Connecting to PB | SM_132949_IGM    | IGHV3-7  | CARERGMATTTW               | IGHJ5 | PB  | 9     |
| 57114 | 38 | Connecting to PB | USM_200000_IGM   | IGHV3-7  | CGRDRGNTVTTTW              | IGHJ5 | PB  | 9     |
| 57114 | 38 | Connecting to PB | SM_132949_IGG    | IGHV3-7  | CSRDRGNTVTTAW              | IGHJ5 | PB  | 10    |
| 57114 | 38 | Connecting to PB | SM_132949_IGM    | IGHV3-7  | CARERGFATTTDW              | IGHJ5 | PB  | 13    |
| 57114 | 38 | Connecting to PB | USM_200000_IGM   | IGHV3-7  | CARERGMATTTW               | IGHJ5 | PB  | 21    |
| 57114 | 38 | Connecting to PB | USM_200000_IGM   | IGHV3-7  | CTRDRGNTATTTW              | IGHJ5 | PB  | 23    |
| 57114 | 38 | Connecting to PB | SM_132949_IGM    | IGHV3-7  | CTRDRGNTVTTTW              | IGHJ5 | PB  | 24    |
| 57114 | 38 | Connecting to PB | DN_33437_IGM     | IGHV3-7  | CTRDRYNTASTAW              | IGHJ5 | PB  | 31    |
| 57114 | 39 | CSF exclusive    | CSF-SM_69_IGG    | IGHV3-21 | CTADERRRQLSTLDYW           | IGHJ4 | CSF | 1     |
| 57114 | 39 | CSF exclusive    | CSF-SM_69_IGM    | IGHV3-21 | CTADERRRQLSTLDYW           | IGHJ4 | CSF | 3269  |
| 57114 | 40 | CSF exclusive    | CSF-SM_69_IGG    | IGHV4-34 | CVRGGFYDKYSGYWCDFW         | IGHJ4 | CSF | 6     |
| 57114 | 40 | CSF exclusive    | CSF-SM_69_IGG    | IGHV4-34 | CVRGGFYDKYSGYWDFW          | IGHJ4 | CSF | 937   |
| 57114 | 41 | Connecting to PB | CSF-USM_22_IGM   | IGHV2-5  | CAHRSTMVSDNW               | IGHJ4 | CSF | 1     |
| 57114 | 41 | Connecting to PB | CSF-SM_69_IGM    | IGHV2-5  | CAHRTTVTSVDNW              | IGHJ4 | CSF | 20    |
| 57114 | 41 | Connecting to PB | CSF-USM_22_IGM   | IGHV2-5  | CAHRTMVTSDNW               | IGHJ4 | CSF | 151   |
| 57114 | 41 | Connecting to PB | CSF-USM_22_IGM   | IGHV2-5  | CAHRTTVTSVDNW              | IGHJ4 | CSF | 16465 |
| 57114 | 41 | Connecting to PB | SM_132949_IGM    | IGHV2-5  | CAHRTTVTSVDNW              | IGHJ4 | PB  | 1     |
| 57114 | 41 | Connecting to PB | PC_854_IGM       | IGHV2-5  | CAHRTTVTSVDNW              | IGHJ4 | PB  | 4     |
| 57114 | 41 | Connecting to PB | USM_200000_IGM   | IGHV2-5  | CVHRTTVTSVDHW              | IGHJ4 | PB  | 6     |
| 57114 | 41 | Connecting to PB | USM_200000_IGM   | IGHV2-5  | CAHRTTVTSVDNW              | IGHJ4 | PB  | 37    |
| 57114 | 41 | Connecting to PB | SM_132949_IGG    | IGHV2-5  | CAHRTTVTSVDYW              | IGHJ4 | PB  | 77    |
| 57114 | 42 | CSF exclusive    | CSF-SM_69_IGM    | IGHV3-21 | CARASEGSTWYSALFYW          | IGHJ4 | CSF | 3054  |
| 57114 | 43 | Connecting to PB | CSF-SM_69_IGM    | IGHV1-3  | CVDRMYWYFDLW               | IGHJ2 | CSF | 1     |
| 57114 | 43 | Connecting to PB | CSF-SM_69_IGM    | IGHV1-3  | CARDRMYWYFDLW              | IGHJ2 | CSF | 13    |

|       |    |                  |                  |          |                           |       |     |      |
|-------|----|------------------|------------------|----------|---------------------------|-------|-----|------|
| 57114 | 43 | Connecting to PB | CSF-USM_22_IGM   | IGHV1-3  | CARDRMWYFDLW              | IGHJ2 | CSF | 9403 |
| 57114 | 43 | Connecting to PB | SM_132949_IGM    | IGHV1-3  | CARDRMWYFDLR              | IGHJ2 | PB  | 1    |
| 57114 | 43 | Connecting to PB | USM_200000_IGM   | IGHV1-3  | CARDWSYWFDLW              | IGHJ2 | PB  | 25   |
| 57114 | 43 | Connecting to PB | USM_200000_IGM   | IGHV1-3  | CARDRMWYFDLW              | IGHJ2 | PB  | 41   |
| 57114 | 44 | CSF exclusive    | CSF-SM_69_IGM    | IGHV3-30 | CARGIAGPTYYYYAMDVW        | IGHJ3 | CSF | 1    |
| 57114 | 45 | Connecting to PB | CSF-SM_69_IGM    | IGHV4-59 | CARGVYGDSDGYW             | IGHJ4 | CSF | 8933 |
| 57114 | 45 | Connecting to PB | USM_200000_IGM   | IGHV4-59 | CARGVYGDSDGYW             | IGHJ4 | PB  | 8    |
| 57114 | 46 | CSF exclusive    | CSF-SM_69_IGM    | IGHV3-11 | CARTWGHYSDYW              | IGHJ4 | CSF | 848  |
| 57114 | 47 | Connecting to PB | CSF-SM_69_IGM    | IGHV3-72 | CGDIGGAPTPYL              | IGHJ4 | CSF | 1210 |
| 57114 | 47 | Connecting to PB | SM_132949_IGG    | IGHV3-72 | CGDIGGAPTPYL              | IGHJ4 | PB  | 5    |
| 57114 | 48 | CSF exclusive    | CSF-SM_69_IGM    | IGHV3-7  | CGRDRGDTVTMTWQGLTVTVSSDVW | IGHJ6 | CSF | 147  |
| 57114 | 49 | CSF exclusive    | CSF-SM_69_IGM    | IGHV3-48 | CTRTWEHDYSDYW             | IGHJ4 | CSF | 1    |
| 57114 | 50 | CSF exclusive    | CSF-SM_69_IGM    | IGHV3-15 | CTTGLDSGVYDHDWVKW         | IGHJ5 | CSF | 161  |
| 57114 | 51 | Connecting to PB | CSF-USM_22_IGM   | IGHV4-55 | CAIIVAKKIDSW              | IGHJ4 | CSF | 2138 |
| 57114 | 51 | Connecting to PB | USM_200000_IGM   | IGHV4-55 | CAIILAKKIDSW              | IGHJ4 | PB  | 48   |
| 57114 | 51 | Connecting to PB | SM_132949_IGM    | IGHV4-55 | CAIIVAKKIDSW              | IGHJ4 | PB  | 53   |
| 57114 | 51 | Connecting to PB | USM_200000_IGM   | IGHV4-55 | CAIIVAKKIDSW              | IGHJ4 | PB  | 130  |
| 57114 | 52 | Connecting to PB | CSF-USM_22_IGM   | IGHV1-3  | CARDERWGPYFSVYW           | IGHJ4 | CSF | 9    |
| 57114 | 52 | Connecting to PB | CSF-USM_22_IGM   | IGHV1-3  | CARDERWGPYFFVYW           | IGHJ4 | CSF | 45   |
| 57114 | 52 | Connecting to PB | CSF-USM_22_IGM   | IGHV1-3  | CARDERWGPYFLVYW           | IGHJ4 | CSF | 1260 |
| 57114 | 52 | Connecting to PB | SM_132949_IGG    | IGHV1-3  | CARDERLGPYFFEYW           | IGHJ4 | PB  | 1    |
| 57114 | 52 | Connecting to PB | SM_132949_IGG    | IGHV1-3  | CARDERWGPYFFVYW           | IGHJ4 | PB  | 3    |
| 57114 | 52 | Connecting to PB | SM_132949_IGG    | IGHV1-3  | CARDEKLGYPFFDFW           | IGHJ4 | PB  | 11   |
| 57114 | 52 | Connecting to PB | SM_132949_IGG    | IGHV1-3  | CARDEKLGYPFFFEW           | IGHJ4 | PB  | 12   |
| 57114 | 52 | Connecting to PB | SM_132949_IGG    | IGHV1-3  | CSRDERLGPYFFTYW           | IGHJ4 | PB  | 13   |
| 57114 | 53 | Connecting to PB | CSF-USM_22_IGM   | IGHV4-4  | CARDMASVFDYW              | IGHJ4 | CSF | 5294 |
| 57114 | 53 | Connecting to PB | USM_200000_IGM   | IGHV4-4  | CAGDMASVFDYW              | IGHJ4 | PB  | 1    |
| 57114 | 53 | Connecting to PB | SM_132949_IGG    | IGHV4-4  | CARDTASVLDLW              | IGHJ4 | PB  | 1    |
| 57114 | 53 | Connecting to PB | SM_132949_IGG    | IGHV4-4  | CARDMASVLDLW              | IGHJ4 | PB  | 2    |
| 57114 | 53 | Connecting to PB | USM_200000_IGM   | IGHV4-4  | CARDMASVFDLW              | IGHJ4 | PB  | 3    |
| 57114 | 53 | Connecting to PB | SM_132949_IGG    | IGHV4-4  | CARDMASVDFW               | IGHJ4 | PB  | 8    |
| 57114 | 53 | Connecting to PB | SM_132949_IGG    | IGHV4-4  | CARDMASVFDLW              | IGHJ4 | PB  | 11   |
| 57114 | 53 | Connecting to PB | SM_132949_IGG    | IGHV4-4  | CARDMASVLDLW              | IGHJ4 | PB  | 15   |
| 57114 | 53 | Connecting to PB | DN_33437_IGG     | IGHV4-4  | CARDMASVFDLW              | IGHJ4 | PB  | 18   |
| 57114 | 53 | Connecting to PB | USM_200000_IGM   | IGHV4-4  | CARDMASVFDYW              | IGHJ4 | PB  | 34   |
| 57114 | 54 | CSF exclusive    | CSF-USM_22_IGM   | IGHV3-74 | CARDPVDGSGHLDYW           | IGHJ4 | CSF | 88   |
| 57114 | 55 | CSF exclusive    | CSF-USM_22_IGM   | IGHV3-21 | CARDRSGLVVAATRSVYNWFDPW   | IGHJ5 | CSF | 297  |
| 57114 | 56 | CSF exclusive    | CSF-USM_22_IGM   | IGHV3-74 | CAREDMDSFYFDYW            | IGHJ4 | CSF | 7    |
| 57114 | 57 | CSF exclusive    | CSF-USM_22_IGM   | IGHV5-51 | CARGFRDGMVW               | IGHJ6 | CSF | 3    |
| 57114 | 57 | CSF exclusive    | CSF-USM_22_IGM   | IGHV5-51 | CARGYRDGMVW               | IGHJ6 | CSF | 319  |
| 57114 | 58 | Connecting to PB | CSF-USM_22_IGM   | IGHV1-3  | CARGIWSSSSDYYFDNW         | IGHJ4 | CSF | 665  |
| 57114 | 58 | Connecting to PB | USM_200000_IGM   | IGHV1-3  | CARGIWSSSSADYYLDHW        | IGHJ4 | PB  | 1    |
| 57114 | 58 | Connecting to PB | USM_200000_IGM   | IGHV1-3  | CARGIWTSSADYYLDHW         | IGHJ4 | PB  | 8    |
| 57114 | 58 | Connecting to PB | USM_200000_IGM   | IGHV1-3  | CARGIWSSSSDYYFDNW         | IGHJ4 | PB  | 25   |
| 57114 | 58 | Connecting to PB | SM_132949_IGM    | IGHV1-3  | CARGIWSSSSDYYLDYW         | IGHJ4 | PB  | 74   |
| 57114 | 59 | Connecting to PB | CSF-USM_22_IGM   | IGHV3-74 | CARPVGITVGVVYW            | IGHJ4 | CSF | 163  |
| 57114 | 59 | Connecting to PB | CSF-USM_22_IGM   | IGHV3-74 | CARPVGIAGVGVVYW           | IGHJ4 | CSF | 364  |
| 57114 | 59 | Connecting to PB | CSF-USM_22_IGM   | IGHV3-74 | CARPVGIAGVGVVYW           | IGHJ4 | CSF | 1946 |
| 57114 | 59 | Connecting to PB | USM_200000_IGM   | IGHV3-74 | CARPVGIAGVGVVYW           | IGHJ4 | PB  | 2    |
| 57114 | 59 | Connecting to PB | SM_132949_IGM    | IGHV3-74 | CARPVGLKVGVDYW            | IGHJ4 | PB  | 19   |
| 57114 | 59 | Connecting to PB | USM_200000_IGM   | IGHV3-74 | CARPVGIAGVGVVYW           | IGHJ4 | PB  | 24   |
| 57114 | 60 | Connecting to PB | CSF-USM_22_IGM   | IGHV3-11 | CARRYCSTTSCTHDYW          | IGHJ4 | CSF | 1020 |
| 57114 | 60 | Connecting to PB | USM_200000_IGM   | IGHV3-11 | CARRYCSTTSCTHDYW          | IGHJ4 | PB  | 2    |
| 57114 | 60 | Connecting to PB | USM_200000_IGM   | IGHV3-11 | CARRYCSTTSCTHDYW          | IGHJ4 | PB  | 2    |
| 57114 | 60 | Connecting to PB | SM_132949_IGM    | IGHV3-11 | CARRYCSTTSCTHDYW          | IGHJ4 | PB  | 6    |
| 57114 | 60 | Connecting to PB | USM_200000_IGM   | IGHV3-11 | CARRYCSTTSCTHDYW          | IGHJ4 | PB  | 77   |
| 57114 | 61 | CSF exclusive    | CSF-USM_22_IGM   | IGHV4-39 | CARSYAYDWGYC              | IGHJ4 | CSF | 5    |
| 57114 | 62 | Connecting to PB | CSF-USM_22_IGM   | IGHV4-4  | CASRIAAAYDYW              | IGHJ4 | CSF | 319  |
| 57114 | 62 | Connecting to PB | USM_200000_IGM   | IGHV4-4  | CASLIAGVAGYDYW            | IGHJ4 | PB  | 1    |
| 57114 | 62 | Connecting to PB | USM_200000_IGM   | IGHV4-4  | CASRIAVAGYGYW             | IGHJ4 | PB  | 1    |
| 57114 | 62 | Connecting to PB | Naive_200000_IGM | IGHV4-4  | CASRIAVAGYDYW             | IGHJ4 | PB  | 2    |
| 57114 | 62 | Connecting to PB | USM_200000_IGM   | IGHV4-4  | CASRMVAVAGYDYW            | IGHJ4 | PB  | 2    |
| 57114 | 62 | Connecting to PB | SM_132949_IGG    | IGHV4-4  | CASRQDVAAYDYW             | IGHJ4 | PB  | 2    |
| 57114 | 62 | Connecting to PB | USM_200000_IGM   | IGHV4-4  | CASRIAVAGPDYW             | IGHJ4 | PB  | 5    |
| 57114 | 62 | Connecting to PB | USM_200000_IGM   | IGHV4-4  | CASRVAVPGPDYW             | IGHJ4 | PB  | 6    |
| 57114 | 62 | Connecting to PB | USM_200000_IGM   | IGHV4-4  | CASRIAVPGYDYW             | IGHJ4 | PB  | 8    |
| 57114 | 62 | Connecting to PB | SM_132949_IGM    | IGHV4-4  | CASRLAAAYDYW              | IGHJ4 | PB  | 26   |
| 57114 | 62 | Connecting to PB | SM_132949_IGG    | IGHV4-4  | CASRLDVAAYDYW             | IGHJ4 | PB  | 43   |
| 57114 | 62 | Connecting to PB | USM_200000_IGM   | IGHV4-4  | CASRIAVAGYDYW             | IGHJ4 | PB  | 52   |
| 57114 | 62 | Connecting to PB | USM_200000_IGM   | IGHV4-4  | CASRIAAAYDYW              | IGHJ4 | PB  | 68   |
| 57114 | 63 | CSF exclusive    | CSF-USM_22_IGM   | IGHV4-55 | CVRDFWSGYCNFDSW           | IGHJ4 | CSF | 7    |
| 57114 | 64 | CSF exclusive    | CSF-USM_22_IGM   | IGHV4-4  | CVRDFWSGYCNFDSW           | IGHJ4 | CSF | 120  |
| 57114 | 65 | CSF exclusive    | CSF-USM_22_IGM   | IGHV3-48 | CVRGGMSRYGMDVW            | IGHJ6 | CSF | 1    |
| 57114 | 66 | Connecting to PB | CSF-USM_22_IGM   | IGHV5-51 | YARHEPAGGRGYSGYDRLVDYW    | IGHJ4 | CSF | 1    |
| 57114 | 66 | Connecting to PB | Naive_200000_IGM | IGHV5-51 | CARHEPAGGRGYSGYDRLVDYW    | IGHJ4 | PB  | 4    |
| 57414 | 1  | Connecting to PB | CSF-DN_15_IGG    | IGHV2-5  | CAHRKESCSAYCSAYSNGMDVW    | IGHJ6 | CSF | 1    |
| 57414 | 1  | Connecting to PB | SM_114480_IGG    | IGHV2-5  | CAHRKESCSAYCSAYSNGMDVW    | IGHJ6 | PB  | 66   |
| 57414 | 2  | CSF exclusive    | CSF-DN_15_IGG    | IGHV4-39 | CANAIPAYYGSWWFDPW         | IGHJ5 | CSF | 1750 |
| 57414 | 3  | Connecting to PB | CSF-DN_15_IGG    | IGHV4-59 | CAREYSSFDYW               | IGHJ4 | CSF | 83   |
| 57414 | 3  | Connecting to PB | SM_114480_IGG    | IGHV4-59 | CAREWSSFDYW               | IGHJ4 | PB  | 60   |
| 57414 | 3  | Connecting to PB | SM_114480_IGG    | IGHV4-59 | CAREWSGLDYW               | IGHJ4 | PB  | 77   |
| 57414 | 3  | Connecting to PB | SM_114480_IGG    | IGHV4-59 | CAREWSAFDYW               | IGHJ4 | PB  | 269  |
| 57414 | 4  | CSF exclusive    | CSF-DN_15_IGG    | IGHV4-34 | CARGHEDFTEMAIGGDAFHIW     | IGHJ3 | CSF | 110  |
| 57414 | 5  | CSF exclusive    | CSF-DN_15_IGG    | IGHV4-59 | CARGSLYSSGWHLRAPDIW       | IGHJ3 | CSF | 1433 |

|       |    |                  |                |          |                           |       |     |       |
|-------|----|------------------|----------------|----------|---------------------------|-------|-----|-------|
| 57414 | 6  | CSF exclusive    | CSF-DN_15_IGG  | IGHV4-59 | CARHFPYGNLFDGFNIW         | IGHJ3 | CSF | 890   |
| 57414 | 7  | CSF exclusive    | CSF-DN_15_IGG  | IGHV4-39 | CARLPLDILTGYLDSW          | IGHJ4 | CSF | 16844 |
| 57414 | 8  | CSF exclusive    | CSF-DN_15_IGG  | IGHV4-39 | CARQGETLVVPAALYFDYW       | IGHJ4 | CSF | 727   |
| 57414 | 9  | CSF exclusive    | CSF-DN_15_IGG  | IGHV4-31 | CARRGTYFYFDYW             | IGHJ4 | CSF | 2514  |
| 57414 | 10 | CSF exclusive    | CSF-DN_15_IGG  | IGHV4-31 | CARSSLWHFGGYGTYFDHW       | IGHJ4 | CSF | 1566  |
| 57414 | 11 | Connecting to PB | CSF-DN_15_IGG  | IGHV3-9  | CVKDEDSVTASFLDNW          | IGHJ4 | CSF | 1     |
| 57414 | 11 | Connecting to PB | SM_114480_IGG  | IGHV3-9  | CVKDEDSVTASFLDNW          | IGHJ4 | PB  | 15    |
| 57414 | 12 | CSF exclusive    | CSF-DN_15_IGG  | IGHV2-70 | CVRSSYGDYADPW             | IGHJ5 | CSF | 1     |
| 57414 | 13 | Connecting to PB | CSF-DN_15_IGG  | IGHV2-5  | CVRSSYGDYADYW             | IGHJ4 | CSF | 1     |
| 57414 | 13 | Connecting to PB | PC_2902_IGG    | IGHV2-5  | CVRSSYGDYADYW             | IGHJ4 | PB  | 3     |
| 57414 | 13 | Connecting to PB | SM_114480_IGG  | IGHV2-5  | CVRSSYGDYADYW             | IGHJ4 | PB  | 12571 |
| 57414 | 14 | CSF exclusive    | CSF-PC_13_IGG  | IGHV2-5  | CAHRRGEDFDYSPFTRHNWFDPW   | IGHJ5 | CSF | 20357 |
| 57414 | 15 | Connecting to PB | CSF-PC_13_IGG  | IGHV4-34 | CARARYCSDNSCLGRNWFDPW     | IGHJ5 | CSF | 43884 |
| 57414 | 15 | Connecting to PB | SM_114480_IGG  | IGHV4-34 | CARARYCSDNSCLGRNWFDPW     | IGHJ5 | PB  | 66    |
| 57414 | 16 | Connecting to PB | CSF-PC_13_IGG  | IGHV4-59 | CARDRSGSYFSFESW           | IGHJ4 | CSF | 1     |
| 57414 | 16 | Connecting to PB | SM_114480_IGG  | IGHV4-59 | CARDRSGTYFSFDSW           | IGHJ4 | PB  | 38    |
| 57414 | 16 | Connecting to PB | PC_2902_IGG    | IGHV4-59 | CARDRSGSYFSFESW           | IGHJ4 | PB  | 1905  |
| 57414 | 17 | CSF exclusive    | CSF-PC_13_IGG  | IGHV4-59 | CARDSYGLPDYW              | IGHJ4 | CSF | 1     |
| 57414 | 18 | CSF exclusive    | CSF-SM_68_IGG  | IGHV3-7  | CARDSVVPDSPVYLPYFDYW      | IGHJ4 | CSF | 565   |
| 57414 | 18 | CSF exclusive    | CSF-PC_13_IGG  | IGHV3-7  | CARDTVVPDSPVYLPYFDYW      | IGHJ4 | CSF | 741   |
| 57414 | 18 | CSF exclusive    | CSF-SM_68_IGG  | IGHV3-7  | CARDTVVPDSPVYLPYFDYW      | IGHJ4 | CSF | 2728  |
| 57414 | 19 | CSF exclusive    | CSF-PC_13_IGG  | IGHV4-59 | CARGVNHHDGTGNYLGSQDQVW    | IGHJ6 | CSF | 1     |
| 57414 | 20 | CSF exclusive    | CSF-PC_13_IGG  | IGHV4-59 | CARGVNYHDSTGNYLGSGLDVW    | IGHJ6 | CSF | 15747 |
| 57414 | 21 | CSF exclusive    | CSF-PC_13_IGG  | IGHV4-39 | CARTVVPFFQYFDYW           | IGHJ4 | CSF | 13593 |
| 57414 | 22 | Connecting to PB | CSF-PC_13_IGG  | IGHV1-3  | CARVPLVVTSTFDW            | IGHJ4 | CSF | 1     |
| 57414 | 22 | Connecting to PB | DN_22710_IGG   | IGHV1-3  | CARVPLVVTSTFDW            | IGHJ4 | PB  | 488   |
| 57414 | 23 | Connecting to PB | CSF-PC_13_IGG  | IGHV4-39 | CASYTVPTSTFYDYW           | IGHJ4 | CSF | 1     |
| 57414 | 23 | Connecting to PB | SM_114480_IGG  | IGHV4-39 | CASYTVPASFYDFW            | IGHJ4 | PB  | 34    |
| 57414 | 23 | Connecting to PB | SM_114480_IGG  | IGHV4-39 | CASYTVPASFYDYW            | IGHJ4 | PB  | 132   |
| 57414 | 23 | Connecting to PB | PC_2902_IGG    | IGHV4-39 | CASYTVPASFYDYW            | IGHJ4 | PB  | 1220  |
| 57414 | 23 | Connecting to PB | PC_2902_IGG    | IGHV4-39 | CASYTVPTSTFYDYW           | IGHJ4 | PB  | 1972  |
| 57414 | 23 | Connecting to PB | SM_114480_IGG  | IGHV4-39 | CASYTVPTSTFYDYW           | IGHJ4 | PB  | 2766  |
| 57414 | 24 | Connecting to PB | CSF-PC_13_IGG  | IGHV1-46 | CTRDTPHANLDYW             | IGHJ4 | CSF | 1     |
| 57414 | 24 | Connecting to PB | SM_114480_IGG  | IGHV1-46 | CTRDTPHANLDYW             | IGHJ4 | PB  | 218   |
| 57414 | 25 | CSF exclusive    | CSF-PC_13_IGG  | IGHV3-42 | LGSGLDVW                  | IGHJ6 | CSF | 1     |
| 57414 | 26 | CSF exclusive    | CSF-SM_68_IGG  | IGHV1-18 | CARDSLKNYDPLTGFFSPVLTFDYW | IGHJ4 | CSF | 26706 |
| 57414 | 27 | CSF exclusive    | CSF-SM_68_IGG  | IGHV3-7  | CARDTLDYYGASGYLRLYFDNW    | IGHJ4 | CSF | 32    |
| 57414 | 28 | Connecting to PB | CSF-SM_68_IGG  | IGHV1-69 | CAREYPELDALDIW            | IGHJ3 | CSF | 2     |
| 57414 | 28 | Connecting to PB | SM_114480_IGG  | IGHV1-69 | CAREYPELDALDIW            | IGHJ3 | PB  | 27    |
| 57414 | 29 | Connecting to PB | CSF-SM_68_IGG  | IGHV4-39 | CARHRRYYGVPDYW            | IGHJ4 | CSF | 1     |
| 57414 | 29 | Connecting to PB | PC_2902_IGG    | IGHV4-39 | CARHRRYYGVPDYW            | IGHJ4 | PB  | 54    |
| 57414 | 29 | Connecting to PB | PC_2902_IGG    | IGHV4-39 | CARHRRYYGVPDYW            | IGHJ4 | PB  | 2401  |
| 57414 | 30 | CSF exclusive    | CSF-SM_68_IGG  | IGHV1-18 | CARRAAGVSVYGYGMDVW        | IGHJ6 | CSF | 3     |
| 57414 | 31 | Connecting to PB | CSF-SM_68_IGG  | IGHV5-51 | CARSRRGGSYTYEVDYW         | IGHJ4 | CSF | 10634 |
| 57414 | 31 | Connecting to PB | SM_114480_IGG  | IGHV5-51 | CARSRRGGSYTYEVDYW         | IGHJ4 | PB  | 53    |
| 57414 | 32 | CSF exclusive    | CSF-SM_68_IGG  | IGHV3-7  | CARTRYSSRWYVTALDYW        | IGHJ4 | CSF | 331   |
| 57414 | 33 | CSF exclusive    | CSF-SM_68_IGM  | IGHV3-23 | CAREGNSIDGYNTLRAYW        | IGHJ4 | CSF | 11    |
| 57414 | 34 | Connecting to PB | CSF-USM_17_IGM | IGHV4-59 | CARIWGSDDYDYDMDVW         | IGHJ6 | CSF | 1     |
| 57414 | 34 | Connecting to PB | CSF-USM_17_IGM | IGHV4-59 | CARIWGSDDYDYDMDVW         | IGHJ6 | CSF | 1     |
| 57414 | 34 | Connecting to PB | CSF-SM_68_IGM  | IGHV4-59 | CARIWGSDDYDYDMDVW         | IGHJ6 | CSF | 38    |
| 57414 | 34 | Connecting to PB | CSF-USM_17_IGM | IGHV4-59 | CARIWGSDDYDYDMDVW         | IGHJ6 | CSF | 31603 |
| 57414 | 34 | Connecting to PB | SM_114480_IGM  | IGHV4-59 | CARIWGSDDYDYDMDVW         | IGHJ6 | PB  | 12    |
| 57414 | 35 | CSF exclusive    | CSF-USM_17_IGM | IGHV3-23 | CARESPNDPQYDFWGGYIGRFDW   | IGHJ4 | CSF | 4442  |
| 57414 | 36 | Connecting to PB | CSF-USM_17_IGM | IGHV4-39 | CARHIGYDSSGYLYYFDYW       | IGHJ4 | CSF | 2     |
| 57414 | 36 | Connecting to PB | USM_66564_IGM  | IGHV4-39 | CARHIGYDSSGYLYYFDYW       | IGHJ4 | PB  | 4     |
| 57414 | 37 | CSF exclusive    | CSF-USM_17_IGM | IGHV4-59 | CARIWGSDDYDYDMDVW         | IGHJ6 | CSF | 1292  |
| 57414 | 38 | CSF exclusive    | CSF-USM_17_IGM | IGHV4-59 | CARIWGSDDYDYDMDVW         | IGHJ6 | CSF | 375   |
| 57414 | 39 | CSF exclusive    | CSF-USM_17_IGM | IGHV4-59 | CARIWGSDDYDYDMDVW         | IGHJ6 | CSF | 5     |
| 57414 | 40 | Connecting to PB | CSF-USM_17_IGM | IGHV4-39 | CASRSIAVAEDW              | IGHJ4 | CSF | 2     |
| 57414 | 40 | Connecting to PB | DN_22710_IGM   | IGHV4-39 | CASRSIAVAEDW              | IGHJ4 | PB  | 570   |
| 57414 | 41 | Connecting to PB | CSF-USM_17_IGM | IGHV3-15 | CTPWSGMDVW                | IGHJ6 | CSF | 3     |
| 57414 | 41 | Connecting to PB | USM_66564_IGM  | IGHV3-15 | CAPWSGLDVW                | IGHJ6 | PB  | 2     |
| 57414 | 41 | Connecting to PB | PC_2902_IGG    | IGHV3-15 | CTPWSGLDVW                | IGHJ6 | PB  | 92    |
| 57414 | 41 | Connecting to PB | PC_2902_IGM    | IGHV3-15 | CTPWSGMDVW                | IGHJ6 | PB  | 490   |
| 57514 | 1  | CSF exclusive    | CSF-DN_83_IGG  | IGHV4-59 | CAGSLRWRQVRMDYW           | IGHJ4 | CSF | 105   |
| 57514 | 2  | CSF exclusive    | CSF-DN_83_IGG  | IGHV3-9  | CAKDIGASGYGFDYW           | IGHJ4 | CSF | 20    |
| 57514 | 3  | CSF exclusive    | CSF-DN_83_IGG  | IGHV3-9  | CAKDISDWYGVVDVW           | IGHJ6 | CSF | 20    |
| 57514 | 4  | Connecting to PB | CSF-DN_83_IGG  | IGHV3-23 | CAKDLGDPYGYGYGMDVW        | IGHJ6 | CSF | 8     |
| 57514 | 4  | Connecting to PB | SM_95720_IGG   | IGHV3-23 | CAKMLVDYGYGYGMDVW         | IGHJ6 | PB  | 4     |
| 57514 | 5  | Connecting to PB | CSF-PC_120_IGG | IGHV3-9  | CAKNGGGSFDPW              | IGHJ5 | CSF | 4     |
| 57514 | 5  | Connecting to PB | CSF-SM_460_IGM | IGHV3-9  | CAKNGGGSFDPW              | IGHJ5 | CSF | 4     |
| 57514 | 5  | Connecting to PB | CSF-SM_460_IGG | IGHV3-9  | CAKNGGGSFDPW              | IGHJ5 | CSF | 5590  |
| 57514 | 5  | Connecting to PB | CSF-DN_83_IGG  | IGHV3-9  | CAKNGGGSFDPW              | IGHJ5 | CSF | 7690  |
| 57514 | 5  | Connecting to PB | SM_95720_IGG   | IGHV3-9  | CAKNGGGSFDPW              | IGHJ5 | PB  | 11    |
| 57514 | 5  | Connecting to PB | PC_1055_IGG    | IGHV3-9  | CAKNGGGSFDPW              | IGHJ5 | PB  | 13    |
| 57514 | 6  | CSF exclusive    | CSF-DN_83_IGG  | IGHV3-30 | CARDQWFEYDYGYGMDVW        | IGHJ6 | CSF | 21    |
| 57514 | 7  | CSF exclusive    | CSF-PC_120_IGG | IGHV4-59 | CARDRREDYSSGYPHLDVW       | IGHJ6 | CSF | 1     |
| 57514 | 7  | CSF exclusive    | CSF-DN_83_IGG  | IGHV4-59 | CARDRREDYSSGYPRLDVW       | IGHJ6 | CSF | 3     |
| 57514 | 8  | CSF exclusive    | CSF-PC_120_IGG | IGHV4-59 | CARDRREDYSSGYPRLDVW       | IGHJ6 | CSF | 689   |
| 57514 | 8  | CSF exclusive    | CSF-DN_83_IGG  | IGHV4-59 | CARDRREDYSSGYPRLDVW       | IGHJ6 | CSF | 2197  |
| 57514 | 9  | CSF exclusive    | CSF-PC_120_IGG | IGHV1-3  | CARDWYDSGWYFDYW           | IGHJ4 | CSF | 2     |
| 57514 | 9  | CSF exclusive    | CSF-DN_83_IGG  | IGHV1-3  | CARDWYDSGWYFDYW           | IGHJ4 | CSF | 254   |
| 57514 | 10 | CSF exclusive    | CSF-DN_83_IGG  | IGHV3-30 | CARERLAAAGTVFDYW          | IGHJ4 | CSF | 19    |
| 57514 | 11 | Connecting to PB | CSF-DN_83_IGG  | IGHV1-69 | CARFRAIHFDLW              | IGHJ4 | CSF | 1824  |
| 57514 | 11 | Connecting to PB | DN_18972_IGG   | IGHV1-69 | CARFRAIHFDLW              | IGHJ4 | PB  | 13    |

|       |    |                  |                   |          |                             |       |     |      |
|-------|----|------------------|-------------------|----------|-----------------------------|-------|-----|------|
| 57514 | 12 | Connecting to PB | CSF-DN_83_IGG     | IGHV3-7  | CARHGYSKCVLSW               | IGHJ5 | CSF | 15   |
| 57514 | 12 | Connecting to PB | SM_95720_IGG      | IGHV3-7  | CARHGYSKCVLSW               | IGHJ5 | PB  | 2    |
| 57514 | 13 | CSF exclusive    | CSF-DN_83_IGG     | IGHV3-23 | CARILSGSYLLDGLSGFDYW        | IGHJ4 | CSF | 19   |
| 57514 | 14 | Connecting to PB | CSF-DN_83_IGG     | IGHV2-26 | CARITGITIDYW                | IGHJ4 | CSF | 1    |
| 57514 | 14 | Connecting to PB | SM_95720_IGM      | IGHV2-26 | CARITGITIDYW                | IGHJ4 | PB  | 1    |
| 57514 | 14 | Connecting to PB | SM_95720_IGM      | IGHV2-26 | CARVDGITIDYW                | IGHJ4 | PB  | 1    |
| 57514 | 14 | Connecting to PB | SM_95720_IGG      | IGHV2-26 | CARITGITIDYW                | IGHJ4 | PB  | 15   |
| 57514 | 14 | Connecting to PB | SM_95720_IGG      | IGHV2-26 | CARIDGITIDSW                | IGHJ4 | PB  | 56   |
| 57514 | 15 | Connecting to PB | CSF-PC_120_IGG    | IGHV2-26 | CAQSLGRLETFGVLI SPNYHYGMDVW | IGHJ6 | CSF | 1    |
| 57514 | 15 | Connecting to PB | CSF-DN_83_IGG     | IGHV2-26 | CARSLGRLEIFGVLI SPNHYYGMDVW | IGHJ6 | CSF | 1    |
| 57514 | 15 | Connecting to PB | CSF-PC_120_IGG    | IGHV2-26 | CARSLGRLEIFGVLI SPNYHYGMDVW | IGHJ6 | CSF | 7678 |
| 57514 | 15 | Connecting to PB | SM_95720_IGG      | IGHV2-26 | CARSLGRLEIFGVLI SPNYHYGMDVW | IGHJ6 | PB  | 2    |
| 57514 | 16 | CSF exclusive    | CSF-DN_83_IGG     | IGHV1-69 | CSFWNYEPSGRYYNHYYGMDLW      | IGHJ3 | CSF | 1    |
| 57514 | 17 | CSF exclusive    | CSF-DN_83_IGG     | IGHV1-69 | CSFWNYEPSGRYYNHYYGMDVW      | IGHJ6 | CSF | 9    |
| 57514 | 18 | CSF exclusive    | CSF-Naive_112_IGM | IGHV1-24 | CAADDRVETIKYYPDLW           | IGHJ4 | CSF | 53   |
| 57514 | 19 | CSF exclusive    | CSF-Naive_112_IGM | IGHV5-51 | CAASPKGSGWGRFDYW            | IGHJ4 | CSF | 30   |
| 57514 | 20 | CSF exclusive    | CSF-Naive_112_IGM | IGHV2-5  | CAHRLGYFGSGTLLFDYW          | IGHJ4 | CSF | 234  |
| 57514 | 21 | CSF exclusive    | CSF-Naive_112_IGM | IGHV2-5  | CAHSRSGSYYCYAMDVW           | IGHJ6 | CSF | 1    |
| 57514 | 21 | CSF exclusive    | CSF-Naive_112_IGM | IGHV2-5  | CAHSRSGSYYCYAMDVW           | IGHJ6 | CSF | 3    |
| 57514 | 22 | CSF exclusive    | CSF-Naive_112_IGM | IGHV2-5  | CAHTDYNYNFNFDPW             | IGHJ5 | CSF | 1807 |
| 57514 | 23 | CSF exclusive    | CSF-Naive_112_IGM | IGHV3-9  | CAKAKYSSSWREYFQHW           | IGHJ1 | CSF | 153  |
| 57514 | 24 | CSF exclusive    | CSF-Naive_112_IGM | IGHV3-9  | CAKDDGSSGWYFSGMDVW          | IGHJ6 | CSF | 45   |
| 57514 | 25 | CSF exclusive    | CSF-Naive_112_IGM | IGHV3-23 | CAKDGSSGWYGMVDVW            | IGHJ6 | CSF | 34   |
| 57514 | 26 | CSF exclusive    | CSF-Naive_112_IGM | IGHV3-23 | CAKDLHGGVWSSFDYW            | IGHJ4 | CSF | 76   |
| 57514 | 27 | CSF exclusive    | CSF-Naive_112_IGM | IGHV3-9  | CAKDLAADWGYYYGMDVW          | IGHJ6 | CSF | 25   |
| 57514 | 28 | CSF exclusive    | CSF-Naive_112_IGM | IGHV3-23 | CAKDLRUVYDSCGFDYW           | IGHJ4 | CSF | 63   |
| 57514 | 29 | CSF exclusive    | CSF-Naive_112_IGM | IGHV3-30 | CAKDLYSSGWYGFADIW           | IGHJ3 | CSF | 66   |
| 57514 | 30 | CSF exclusive    | CSF-Naive_112_IGM | IGHV3-9  | CAKDNRGYDFDYFDYW            | IGHJ4 | CSF | 93   |
| 57514 | 31 | CSF exclusive    | CSF-Naive_112_IGM | IGHV3-9  | CAKDRAYGSSGHIDYW            | IGHJ4 | CSF | 58   |
| 57514 | 32 | CSF exclusive    | CSF-Naive_112_IGM | IGHV3-30 | CAKEGDDYDSDGFDYW            | IGHJ4 | CSF | 77   |
| 57514 | 33 | CSF exclusive    | CSF-Naive_112_IGM | IGHV3-23 | CAKGIWRPLDGDYGFADIW         | IGHJ3 | CSF | 21   |
| 57514 | 34 | CSF exclusive    | CSF-Naive_112_IGM | IGHV3-23 | CAKSGWFGDLLSQDFDYW          | IGHJ4 | CSF | 81   |
| 57514 | 35 | CSF exclusive    | CSF-Naive_112_IGM | IGHV3-23 | CAKSSYYDILTLGLNDAFDIW       | IGHJ3 | CSF | 119  |
| 57514 | 36 | CSF exclusive    | CSF-Naive_112_IGM | IGHV2-5  | CALNSGGLVVAATSDFDPW         | IGHJ5 | CSF | 383  |
| 57514 | 37 | CSF exclusive    | CSF-Naive_112_IGM | IGHV3-13 | CARAGDQDWYFDLW              | IGHJ2 | CSF | 126  |
| 57514 | 38 | CSF exclusive    | CSF-Naive_112_IGM | IGHV3-11 | CARAGLPVDSGSYQQYDYW         | IGHJ4 | CSF | 102  |
| 57514 | 39 | CSF exclusive    | CSF-Naive_112_IGM | IGHV3-74 | CARAWNLLNGMDVW              | IGHJ6 | CSF | 27   |
| 57514 | 40 | Connecting to PB | CSF-Naive_112_IGM | IGHV1-3  | CARDETYNSGRNYYW             | IGHJ4 | CSF | 1    |
| 57514 | 40 | Connecting to PB | USM_84463_IGM     | IGHV1-3  | CARDETYNSGRNYYW             | IGHJ4 | PB  | 129  |
| 57514 | 41 | CSF exclusive    | CSF-Naive_112_IGM | IGHV1-46 | CARDGRSTTWDVHSDPW           | IGHJ5 | CSF | 50   |
| 57514 | 42 | CSF exclusive    | CSF-Naive_112_IGM | IGHV3-7  | CARDGTTEYSGSYTYYYGMDVW      | IGHJ6 | CSF | 34   |
| 57514 | 43 | Connecting to PB | CSF-Naive_112_IGM | IGHV3-53 | RARDLGTAGTVYDAFDIW          | IGHJ3 | CSF | 2    |
| 57514 | 43 | Connecting to PB | CSF-Naive_112_IGM | IGHV3-53 | CARDLGTGTVYDAFDIW           | IGHJ3 | CSF | 166  |
| 57514 | 43 | Connecting to PB | Naive_175179_IGM  | IGHV3-53 | CARDLGTGTVYDAFDIW           | IGHJ3 | PB  | 4    |
| 57514 | 44 | Connecting to PB | CSF-Naive_112_IGM | IGHV3-21 | CARDLYGDYVVDYW              | IGHJ4 | CSF | 49   |
| 57514 | 44 | Connecting to PB | USM_84463_IGM     | IGHV3-21 | CARDLYGDYSLDYW              | IGHJ4 | PB  | 3    |
| 57514 | 44 | Connecting to PB | Naive_175179_IGM  | IGHV3-21 | CARDYDGYVVDYW               | IGHJ4 | PB  | 3    |
| 57514 | 45 | CSF exclusive    | CSF-Naive_112_IGM | IGHV3-48 | CARDRHGDYQIDYW              | IGHJ4 | CSF | 34   |
| 57514 | 46 | CSF exclusive    | CSF-Naive_112_IGM | IGHV3-21 | CARDRRDYGADVW               | IGHJ6 | CSF | 166  |
| 57514 | 47 | Connecting to PB | CSF-Naive_112_IGM | IGHV1-18 | CARDSTYYDSSGYYYTDLIDYW      | IGHJ4 | CSF | 224  |
| 57514 | 47 | Connecting to PB | Naive_175179_IGM  | IGHV1-18 | CARDSTYYDSSGYYYTDLIDYW      | IGHJ4 | PB  | 1    |
| 57514 | 48 | CSF exclusive    | CSF-Naive_112_IGM | IGHV4-59 | CAREGYCSGGSCYSDAFDIW        | IGHJ3 | CSF | 426  |
| 57514 | 49 | CSF exclusive    | CSF-Naive_112_IGM | IGHV4-4  | CAREREYLLDYW                | IGHJ4 | CSF | 625  |
| 57514 | 50 | CSF exclusive    | CSF-Naive_112_IGM | IGHV4-59 | CARGANWGSTPFDPW             | IGHJ4 | CSF | 324  |
| 57514 | 51 | Connecting to PB | CSF-Naive_112_IGM | IGHV4-34 | CARGAYNWNPAHYYYAMDVW        | IGHJ6 | CSF | 5    |
| 57514 | 51 | Connecting to PB | USM_84463_IGM     | IGHV4-34 | CARGAYNWNPAHYYYAMDVW        | IGHJ6 | PB  | 10   |
| 57514 | 51 | Connecting to PB | USM_84463_IGM     | IGHV4-34 | CARGAYNWNPAHYYYALDVG        | IGHJ6 | PB  | 13   |
| 57514 | 52 | CSF exclusive    | CSF-Naive_112_IGM | IGHV1-46 | CARGEYDSSGYLSW              | IGHJ5 | CSF | 33   |
| 57514 | 53 | CSF exclusive    | CSF-Naive_112_IGM | IGHV1-8  | CARGRGDYNNMDVW              | IGHJ6 | CSF | 8    |
| 57514 | 54 | CSF exclusive    | CSF-Naive_112_IGM | IGHV3-43 | CARGYSGYDYSYFDYW            | IGHJ4 | CSF | 44   |
| 57514 | 55 | Connecting to PB | CSF-Naive_112_IGM | IGHV4-34 | CARGYTNSWYDYW               | IGHJ4 | CSF | 1017 |
| 57514 | 55 | Connecting to PB | USM_84463_IGM     | IGHV4-34 | CARGYTNSWYDYW               | IGHJ4 | PB  | 1    |
| 57514 | 55 | Connecting to PB | PC_1055_IGM       | IGHV4-34 | CARGYTNSWYDYW               | IGHJ4 | PB  | 1    |
| 57514 | 56 | CSF exclusive    | CSF-Naive_112_IGM | IGHV1-2  | CARGYYSQNWFDPW              | IGHJ5 | CSF | 880  |
| 57514 | 57 | CSF exclusive    | CSF-Naive_112_IGM | IGHV4-39 | CARLVGITAALDYW              | IGHJ4 | CSF | 490  |
| 57514 | 58 | CSF exclusive    | CSF-Naive_112_IGM | IGHV4-4  | CARMVATLYSGPFDYW            | IGHJ4 | CSF | 307  |
| 57514 | 59 | CSF exclusive    | CSF-Naive_112_IGM | IGHV2-26 | CARMVVYDFWGLNYCDYW          | IGHJ4 | CSF | 140  |
| 57514 | 60 | CSF exclusive    | CSF-Naive_112_IGM | IGHV4-39 | CARRESTVIDYW                | IGHJ4 | CSF | 1472 |
| 57514 | 61 | CSF exclusive    | CSF-Naive_112_IGM | IGHV2-5  | CARRGIFYSGSNNWFDPW          | IGHJ5 | CSF | 12   |
| 57514 | 62 | CSF exclusive    | CSF-Naive_112_IGM | IGHV4-4  | CARRGYSYFYGMVDVW            | IGHJ6 | CSF | 177  |
| 57514 | 63 | CSF exclusive    | CSF-Naive_112_IGM | IGHV2-5  | CARRHRMAVAGDYGMVDVW         | IGHJ6 | CSF | 345  |
| 57514 | 64 | CSF exclusive    | CSF-Naive_112_IGM | IGHV4-28 | CARSYVWFGEFHGMVDVW          | IGHJ6 | CSF | 208  |
| 57514 | 65 | CSF exclusive    | CSF-Naive_112_IGM | IGHV1-46 | CARSPYDILLTGYWYDYYGMDVW     | IGHJ6 | CSF | 103  |
| 57514 | 66 | CSF exclusive    | CSF-Naive_112_IGM | IGHV3-48 | CARSYSSGWVFDYW              | IGHJ4 | CSF | 245  |
| 57514 | 67 | Connecting to PB | CSF-Naive_112_IGM | IGHV7-81 | CARTPSRDAFDIW               | IGHJ3 | CSF | 5049 |
| 57514 | 67 | Connecting to PB | Naive_175179_IGM  | IGHV7-81 | CARTPSRDAFDIW               | IGHJ3 | PB  | 1    |
| 57514 | 68 | CSF exclusive    | CSF-Naive_112_IGM | IGHV1-46 | CARTRGYSYRDAFDIW            | IGHJ3 | CSF | 17   |
| 57514 | 69 | CSF exclusive    | CSF-Naive_112_IGM | IGHV1-8  | CARTRWLRFWYSGMVDVW          | IGHJ6 | CSF | 47   |
| 57514 | 70 | CSF exclusive    | CSF-Naive_112_IGM | IGHV3-66 | CARVEEDYYESGNWFDPW          | IGHJ5 | CSF | 122  |
| 57514 | 71 | CSF exclusive    | CSF-Naive_112_IGM | IGHV1-46 | CARVPPVTVEYYPDYW            | IGHJ4 | CSF | 44   |
| 57514 | 72 | Connecting to PB | CSF-Naive_112_IGM | IGHV1-2  | CASGRSYGDYLDADFIDW          | IGHJ3 | CSF | 1765 |
| 57514 | 72 | Connecting to PB | PC_1055_IGG       | IGHV1-2  | CASGRSYGDYLDADFIDW          | IGHJ3 | PB  | 1    |
| 57514 | 72 | Connecting to PB | USM_84463_IGM     | IGHV1-2  | CASGRSYGDYLDADFIDW          | IGHJ3 | PB  | 9    |
| 57514 | 73 | CSF exclusive    | CSF-Naive_112_IGM | IGHV5-51 | CASPHYDILTGYYSFDYW          | IGHJ4 | CSF | 175  |
| 57514 | 74 | CSF exclusive    | CSF-Naive_112_IGM | IGHV3-53 | CASQGYSGYFGMDVW             | IGHJ6 | CSF | 1    |

|       |     |                  |                   |          |                            |       |     |       |
|-------|-----|------------------|-------------------|----------|----------------------------|-------|-----|-------|
| 57514 | 75  | CSF exclusive    | CSF-Naive_112_IGM | IGHV3-53 | CASQGYSYGLKGDYW            | IGHJ4 | CSF | 309   |
| 57514 | 76  | CSF exclusive    | CSF-Naive_112_IGM | IGHV3-48 | CASSDIVVAEYYPDYW           | IGHJ4 | CSF | 172   |
| 57514 | 77  | CSF exclusive    | CSF-Naive_112_IGM | IGHV3-48 | CASTSGISSRYYYGMDVW         | IGHJ6 | CSF | 29    |
| 57514 | 78  | CSF exclusive    | CSF-Naive_112_IGM | IGHV3-23 | CATPAKSSGGSGW              | IGHJ5 | CSF | 111   |
| 57514 | 79  | Connecting to PB | CSF-Naive_112_IGM | IGHV5-51 | CATQLDWWAYW                | IGHJ4 | CSF | 1466  |
| 57514 | 79  | Connecting to PB | PC_1055_IGM       | IGHV5-51 | CATQLDWWAYW                | IGHJ4 | PB  | 1     |
| 57514 | 80  | Connecting to PB | CSF-Naive_112_IGM | IGHV3-74 | CVRDENNSVDFDCW             | IGHJ4 | CSF | 1     |
| 57514 | 80  | Connecting to PB | CSF-Naive_112_IGM | IGHV3-74 | CVRDENNSVDFDYW             | IGHJ4 | CSF | 18    |
| 57514 | 80  | Connecting to PB | USM_84463_IGM     | IGHV3-74 | CVRDENNSVDFDYW             | IGHJ4 | PB  | 1     |
| 57514 | 81  | CSF exclusive    | CSF-Naive_112_IGM | IGHV3-7  | CVRESIKGEDHW               | IGHJ5 | CSF | 13    |
| 57514 | 82  | Connecting to PB | CSF-PC_120_IGG    | IGHV2-26 | CAGIRTATTHLVHW             | IGHJ4 | CSF | 1     |
| 57514 | 82  | Connecting to PB | DN_18972_IGG      | IGHV2-26 | CAGIRTATTHLVHW             | IGHJ4 | PB  | 127   |
| 57514 | 83  | Connecting to PB | CSF-PC_120_IGG    | IGHV2-5  | CAHLSTMVREFDYW             | IGHJ4 | CSF | 5     |
| 57514 | 83  | Connecting to PB | USM_84463_IGM     | IGHV2-5  | CAHLSTMVREFDYW             | IGHJ4 | PB  | 12    |
| 57514 | 84  | Connecting to PB | CSF-PC_120_IGG    | IGHV2-5  | CAHRPKILWVGVRDCFYW         | IGHJ4 | CSF | 1     |
| 57514 | 84  | Connecting to PB | DN_18972_IGG      | IGHV2-5  | CAHRPKILWVGVRDCFYW         | IGHJ4 | PB  | 746   |
| 57514 | 85  | Connecting to PB | CSF-PC_120_IGG    | IGHV1-3  | CAIHMTYDTFDVW              | IGHJ3 | CSF | 1     |
| 57514 | 85  | Connecting to PB | PC_1055_IGG       | IGHV1-3  | CAIHMTYDAFDIW              | IGHJ3 | PB  | 1     |
| 57514 | 85  | Connecting to PB | SM_95720_IGG      | IGHV1-3  | CAIHMTYDAFDTW              | IGHJ3 | PB  | 1     |
| 57514 | 85  | Connecting to PB | Naive_175179_IGM  | IGHV1-3  | CAIHMTYDAFDIW              | IGHJ3 | PB  | 7     |
| 57514 | 85  | Connecting to PB | PC_1055_IGM       | IGHV1-3  | CAIHMTYDAFDIW              | IGHJ3 | PB  | 7     |
| 57514 | 85  | Connecting to PB | SM_95720_IGG      | IGHV1-3  | CAIHMTYDAFDIW              | IGHJ3 | PB  | 33    |
| 57514 | 85  | Connecting to PB | USM_84463_IGM     | IGHV1-3  | CAIHMTYDAFDIW              | IGHJ3 | PB  | 39    |
| 57514 | 85  | Connecting to PB | SM_95720_IGM      | IGHV1-3  | CAIHMTYDAFDIW              | IGHJ3 | PB  | 29555 |
| 57514 | 86  | CSF exclusive    | CSF-PC_120_IGG    | IGHV1-2  | CAKEQATVTARPTTG            | IGHJ4 | CSF | 1     |
| 57514 | 87  | CSF exclusive    | CSF-PC_120_IGG    | IGHV1-2  | CAKEQDYGYRTPDPW            | IGHJ5 | CSF | 2     |
| 57514 | 88  | Connecting to PB | CSF-SM_460_IGG    | IGHV1-2  | CAKEQDCGYRTPDYW            | IGHJ4 | CSF | 1     |
| 57514 | 88  | Connecting to PB | CSF-PC_120_IGG    | IGHV1-2  | CAREQDYGYRTPDYW            | IGHJ4 | CSF | 5495  |
| 57514 | 88  | Connecting to PB | CSF-PC_120_IGG    | IGHV1-2  | CAKEQDYGYRTPDYW            | IGHJ4 | CSF | 14000 |
| 57514 | 88  | Connecting to PB | PC_1055_IGG       | IGHV1-2  | CAKEQDYGYRTPDYW            | IGHJ4 | PB  | 1     |
| 57514 | 88  | Connecting to PB | PC_1055_IGG       | IGHV1-2  | CAREQDYGYRTPDYW            | IGHJ4 | PB  | 1     |
| 57514 | 88  | Connecting to PB | SM_95720_IGG      | IGHV1-2  | CAREQDYGYRTPDYW            | IGHJ4 | PB  | 3     |
| 57514 | 88  | Connecting to PB | SM_95720_IGG      | IGHV1-2  | CAREQDYGYRTPDYW            | IGHJ4 | PB  | 16    |
| 57514 | 88  | Connecting to PB | SM_95720_IGG      | IGHV1-2  | CAKEQDHNYYRTPDYW           | IGHJ4 | PB  | 17    |
| 57514 | 89  | Connecting to PB | CSF-PC_120_IGG    | IGHV3-74 | CAKEVHVGGSTDYW             | IGHJ4 | CSF | 1     |
| 57514 | 89  | Connecting to PB | PC_1055_IGG       | IGHV3-74 | CAKEVHVGGSTDYW             | IGHJ4 | PB  | 1     |
| 57514 | 89  | Connecting to PB | SM_95720_IGG      | IGHV3-74 | CAKEVHVGGSTDYW             | IGHJ4 | PB  | 142   |
| 57514 | 89  | Connecting to PB | PC_1055_IGG       | IGHV3-74 | CAKEVHVGGSTDYW             | IGHJ4 | PB  | 931   |
| 57514 | 90  | Connecting to PB | CSF-PC_120_IGG    | IGHV3-23 | CAKGSVAGSYW                | IGHJ4 | CSF | 4871  |
| 57514 | 90  | Connecting to PB | PC_1055_IGG       | IGHV3-23 | CAKGSVAGSYW                | IGHJ4 | PB  | 1     |
| 57514 | 90  | Connecting to PB | SM_95720_IGG      | IGHV3-23 | CAKGSVAGSYW                | IGHJ4 | PB  | 3     |
| 57514 | 91  | Connecting to PB | CSF-PC_120_IGG    | IGHV2-5  | CALLHSDVEDAFDVW            | IGHJ3 | CSF | 180   |
| 57514 | 91  | Connecting to PB | SM_95720_IGG      | IGHV2-5  | CALLHSDVEDAFDVW            | IGHJ3 | PB  | 9     |
| 57514 | 92  | CSF exclusive    | CSF-PC_120_IGG    | IGHV2-5  | CARAARFFDHNSFGDYSYSMDIW    | IGHJ6 | CSF | 357   |
| 57514 | 93  | Connecting to PB | CSF-PC_120_IGG    | IGHV3-7  | CARDCSGGTCYPYYGMDVW        | IGHJ6 | CSF | 575   |
| 57514 | 93  | Connecting to PB | SM_95720_IGG      | IGHV3-7  | CARDCSGGTCYPYYGMDVW        | IGHJ6 | PB  | 7     |
| 57514 | 94  | CSF exclusive    | CSF-PC_120_IGG    | IGHV3-7  | CARDHVPVPGTPLYW            | IGHJ4 | CSF | 89    |
| 57514 | 95  | CSF exclusive    | CSF-PC_120_IGG    | IGHV3-33 | CARDHVSVPGTPLYW            | IGHJ4 | CSF | 1     |
| 57514 | 96  | Connecting to PB | CSF-PC_120_IGG    | IGHV1-18 | CARDMARLYKGAQQGLGFDPW      | IGHJ5 | CSF | 1     |
| 57514 | 96  | Connecting to PB | SM_95720_IGG      | IGHV1-18 | CARDMARLYKGAQQGLGFDPW      | IGHJ5 | PB  | 944   |
| 57514 | 97  | CSF exclusive    | CSF-PC_120_IGG    | IGHV3-30 | CARDPNPIEVILTVDVDFW        | IGHJ4 | CSF | 1337  |
| 57514 | 98  | Connecting to PB | CSF-PC_120_IGG    | IGHV7-81 | CARDSRGWHNWFDPW            | IGHJ5 | CSF | 1     |
| 57514 | 98  | Connecting to PB | SM_95720_IGG      | IGHV7-81 | CARDSRGWHNWFDPW            | IGHJ5 | PB  | 70    |
| 57514 | 99  | Connecting to PB | CSF-PC_120_IGG    | IGHV1-69 | CARDYFGSGSFYTVYDTFDTW      | IGHJ3 | CSF | 1     |
| 57514 | 99  | Connecting to PB | CSF-PC_120_IGG    | IGHV1-69 | CARDYFGSGSFYTVYDTFDVW      | IGHJ3 | CSF | 19927 |
| 57514 | 99  | Connecting to PB | DN_18972_IGG      | IGHV1-69 | CARDYFGSGSFYTVYDTFDVW      | IGHJ3 | PB  | 2     |
| 57514 | 99  | Connecting to PB | SM_95720_IGG      | IGHV1-69 | CARDYFGSGSFYTVYDTFDVW      | IGHJ3 | PB  | 14    |
| 57514 | 100 | Connecting to PB | CSF-PC_120_IGG    | IGHV7-81 | CAREGATVTNDYW              | IGHJ4 | CSF | 1     |
| 57514 | 100 | Connecting to PB | DN_18972_IGG      | IGHV7-81 | CAREGATVTNDYW              | IGHJ4 | PB  | 57    |
| 57514 | 101 | Connecting to PB | CSF-PC_120_IGG    | IGHV1-69 | CAREGSSVIVPPTVDYGGMDVW     | IGHJ6 | CSF | 1     |
| 57514 | 101 | Connecting to PB | DN_18972_IGG      | IGHV1-69 | CAREGSSVIVPPTVDYGGMDVW     | IGHJ6 | PB  | 137   |
| 57514 | 102 | Connecting to PB | CSF-PC_120_IGG    | IGHV4-4  | CARENNGDDVGFYW             | IGHJ4 | CSF | 1     |
| 57514 | 102 | Connecting to PB | CSF-PC_120_IGG    | IGHV4-4  | CARENNDVGFYW               | IGHJ4 | CSF | 1380  |
| 57514 | 102 | Connecting to PB | SM_95720_IGG      | IGHV4-4  | CARENNDVGFYW               | IGHJ4 | PB  | 16    |
| 57514 | 103 | Connecting to PB | CSF-PC_120_IGG    | IGHV6-1  | CAREVDPMPVHTATFDHW         | IGHJ4 | CSF | 1     |
| 57514 | 103 | Connecting to PB | CSF-SM_460_IGG    | IGHV6-1  | CAREVDPMPVHTATFDHW         | IGHJ4 | CSF | 1238  |
| 57514 | 103 | Connecting to PB | SM_95720_IGG      | IGHV6-1  | CAREADPPMVHTATFDHW         | IGHJ4 | PB  | 1     |
| 57514 | 103 | Connecting to PB | DN_18972_IGG      | IGHV6-1  | CAREVDPMPVHTATFDHW         | IGHJ4 | PB  | 1     |
| 57514 | 104 | Connecting to PB | CSF-PC_120_IGG    | IGHV4-59 | CARFEWERIADYW              | IGHJ4 | CSF | 1     |
| 57514 | 104 | Connecting to PB | DN_18972_IGG      | IGHV4-59 | CARFEWERIADYW              | IGHJ4 | PB  | 83    |
| 57514 | 105 | Connecting to PB | CSF-PC_120_IGG    | IGHV1-24 | CARGDSSGFLLDYW             | IGHJ4 | CSF | 1     |
| 57514 | 105 | Connecting to PB | DN_18972_IGG      | IGHV1-24 | CARGDSSGFLLDYW             | IGHJ4 | PB  | 23    |
| 57514 | 106 | Connecting to PB | CSF-PC_120_IGG    | IGHV1-69 | CARGGRGGVDYDGMVW           | IGHJ6 | CSF | 1     |
| 57514 | 106 | Connecting to PB | SM_95720_IGG      | IGHV1-69 | CARGGRGGVDYDGMVW           | IGHJ6 | PB  | 48    |
| 57514 | 107 | CSF exclusive    | CSF-PC_120_IGG    | IGHV4-34 | CARGGSAGGWFSTRKGYFDFW      | IGHJ4 | CSF | 1307  |
| 57514 | 108 | CSF exclusive    | CSF-PC_120_IGG    | IGHV4-34 | CARGGYPGGAYFSTPGPEKGGFDIW  | IGHJ3 | CSF | 204   |
| 57514 | 109 | Connecting to PB | CSF-PC_120_IGG    | IGHV4-39 | CARGTPWVRGLMPTRGYYYGMDVW   | IGHJ6 | CSF | 2     |
| 57514 | 109 | Connecting to PB | DN_18972_IGG      | IGHV4-39 | CARGTPWVRGLMPTRGYYYGMDVW   | IGHJ6 | PB  | 1     |
| 57514 | 109 | Connecting to PB | PC_1055_IGG       | IGHV4-39 | CARGTPWVRGLMPTRGYYYGMDVW   | IGHJ6 | PB  | 3     |
| 57514 | 109 | Connecting to PB | DN_18972_IGM      | IGHV4-39 | CARGTPWVRGLMPTRGYYYGMDVW   | IGHJ6 | PB  | 7     |
| 57514 | 109 | Connecting to PB | DN_18972_IGG      | IGHV4-39 | CARGTPWVRGLMPTRGYYYGMDVW   | IGHJ6 | PB  | 10981 |
| 57514 | 110 | Connecting to PB | CSF-PC_120_IGG    | IGHV4-39 | CARHIGSDPRHDYDTGGYYLWVDFPW | IGHJ5 | CSF | 312   |
| 57514 | 110 | Connecting to PB | DN_18972_IGG      | IGHV4-39 | CARHIGSDPRHDYDTGGYYLWVDFPW | IGHJ5 | PB  | 1     |
| 57514 | 111 | CSF exclusive    | CSF-PC_120_IGG    | IGHV1-18 | CARHSAPVLLRGLSTPWFDPW      | IGHJ5 | CSF | 138   |

|       |     |                  |                  |          |                             |       |     |       |
|-------|-----|------------------|------------------|----------|-----------------------------|-------|-----|-------|
| 57514 | 112 | Connecting to PB | CSF-PC_120_IGG   | IGHV2-26 | CARIRRRGTFHPLSYGMDVW        | IGHJ6 | CSF | 1     |
| 57514 | 112 | Connecting to PB | DN_18972_IGG     | IGHV2-26 | CARIRRRGTFHPLSYGMDVW        | IGHJ6 | PB  | 383   |
| 57514 | 113 | Connecting to PB | CSF-SM_460_IGG   | IGHV4-59 | CARLPSYTSENWGMGMDVW         | IGHJ6 | CSF | 370   |
| 57514 | 113 | Connecting to PB | CSF-PC_120_IGG   | IGHV4-59 | CARLPSYTSENWGMGMDVW         | IGHJ6 | CSF | 1961  |
| 57514 | 113 | Connecting to PB | SM_95720_IGG     | IGHV4-59 | CARLPSYTSENWGMGMDVW         | IGHJ6 | PB  | 32    |
| 57514 | 114 | CSF exclusive    | CSF-PC_120_IGG   | IGHV4-39 | CARLYSHSVSCVSLDAFDIW        | IGHJ3 | CSF | 1     |
| 57514 | 114 | CSF exclusive    | CSF-PC_120_IGG   | IGHV4-39 | RARLYCHSVSCVSLDAFDIW        | IGHJ3 | CSF | 1     |
| 57514 | 114 | CSF exclusive    | CSF-PC_120_IGG   | IGHV4-39 | CARLYCYSVSCVSLDAFDIW        | IGHJ3 | CSF | 185   |
| 57514 | 115 | CSF exclusive    | CSF-PC_120_IGG   | IGHV4-4  | CARPSFYDGRDYHDGDAFDIW       | IGHJ3 | CSF | 4054  |
| 57514 | 116 | CSF exclusive    | CSF-PC_120_IGG   | IGHV4-39 | CARQLERVWGSYRLFMDVW         | IGHJ6 | CSF | 33    |
| 57514 | 117 | Connecting to PB | CSF-PC_120_IGG   | IGHV4-39 | CARRSVGYCSDTSCYDYYYYYGMVDVW | IGHJ6 | CSF | 4229  |
| 57514 | 117 | Connecting to PB | PC_1055_IGG      | IGHV4-39 | CARRSVGYCSDTSCYDYYYYYGMVDVW | IGHJ6 | PB  | 4     |
| 57514 | 117 | Connecting to PB | SM_95720_IGG     | IGHV4-39 | CARRSVGYCSDTSCYDYYYYYGMVDVW | IGHJ6 | PB  | 27    |
| 57514 | 118 | Connecting to PB | CSF-PC_120_IGG   | IGHV4-4  | CARSTSWYSGAFSDYWPWI         | IGHJ3 | CSF | 1     |
| 57514 | 118 | Connecting to PB | SM_95720_IGG     | IGHV4-4  | CARSTSWYSGAFSDYWPWI         | IGHJ3 | PB  | 4     |
| 57514 | 118 | Connecting to PB | PC_1055_IGG      | IGHV4-4  | CARSTSWYSGAFSDYWPWI         | IGHJ3 | PB  | 10787 |
| 57514 | 119 | Connecting to PB | CSF-PC_120_IGG   | IGHV2-70 | CARTITAGGTDDAFDDW           | IGHJ3 | CSF | 1     |
| 57514 | 119 | Connecting to PB | DN_18972_IGG     | IGHV2-70 | CARTITAGGTDDAFDDW           | IGHJ3 | PB  | 80    |
| 57514 | 120 | CSF exclusive    | CSF-PC_120_IGG   | IGHV4-34 | CARVNPEWRQLGQPTGVRWFYFDLW   | IGHJ2 | CSF | 1     |
| 57514 | 121 | Connecting to PB | CSF-PC_120_IGG   | IGHV1-18 | CARVPDYWGSESRQRTDYW         | IGHJ4 | CSF | 73    |
| 57514 | 121 | Connecting to PB | USM_84463_IGM    | IGHV1-18 | CARVPDYYGSESRRTDYW          | IGHJ4 | PB  | 9     |
| 57514 | 121 | Connecting to PB | USM_84463_IGM    | IGHV1-18 | CARVPDYYGSESRITDYW          | IGHJ4 | PB  | 11    |
| 57514 | 121 | Connecting to PB | SM_95720_IGG     | IGHV1-18 | CARVPDYWGSESRITDYW          | IGHJ4 | PB  | 15    |
| 57514 | 121 | Connecting to PB | USM_84463_IGM    | IGHV1-18 | CARVPDYYGSESRITDYW          | IGHJ4 | PB  | 21    |
| 57514 | 122 | CSF exclusive    | CSF-PC_120_IGG   | IGHV1-69 | CARVPKKQLVERYYYGMVDVW       | IGHJ6 | CSF | 1     |
| 57514 | 123 | CSF exclusive    | CSF-PC_120_IGG   | IGHV1-18 | CARVRAARPDWLYGMDVW          | IGHJ6 | CSF | 173   |
| 57514 | 124 | Connecting to PB | CSF-PC_120_IGG   | IGHV4-59 | CARVRESGYDEFDYM             | IGHJ4 | CSF | 1715  |
| 57514 | 124 | Connecting to PB | SM_95720_IGG     | IGHV4-59 | CARVRESGYDEFDYM             | IGHJ4 | PB  | 37    |
| 57514 | 125 | Connecting to PB | CSF-PC_120_IGG   | IGHV4-34 | CARVRGVYAPYCFDYW            | IGHJ4 | CSF | 1     |
| 57514 | 125 | Connecting to PB | PC_1055_IGG      | IGHV4-34 | CARVRGVYAPYCFDYW            | IGHJ4 | PB  | 662   |
| 57514 | 126 | Connecting to PB | CSF-PC_120_IGG   | IGHV4-34 | CARVRNNCVGGRCYDRFDYW        | IGHJ4 | CSF | 1     |
| 57514 | 126 | Connecting to PB | SM_95720_IGG     | IGHV4-34 | CARVRNNCVGGRCYDRFDYW        | IGHJ4 | PB  | 4     |
| 57514 | 126 | Connecting to PB | PC_1055_IGG      | IGHV4-34 | CARVRNNCVGGRCYDRFDYW        | IGHJ4 | PB  | 952   |
| 57514 | 127 | Connecting to PB | CSF-PC_120_IGG   | IGHV4-34 | CARVSGRWIDVLYYHNAMDVW       | IGHJ6 | CSF | 572   |
| 57514 | 127 | Connecting to PB | SM_95720_IGG     | IGHV4-34 | CARVSGRWIDVLYYHNAMDVW       | IGHJ6 | PB  | 3     |
| 57514 | 127 | Connecting to PB | DN_18972_IGG     | IGHV4-34 | CARVSGRWIDVLYYHNAMDVW       | IGHJ6 | PB  | 18    |
| 57514 | 128 | Connecting to PB | CSF-PC_120_IGG   | IGHV4-59 | CARVVGADDAFDIW              | IGHJ3 | CSF | 1     |
| 57514 | 128 | Connecting to PB | DN_18972_IGM     | IGHV4-59 | CARVVGADDAFDIW              | IGHJ3 | PB  | 1     |
| 57514 | 128 | Connecting to PB | DN_18972_IGG     | IGHV4-59 | CARVVGADDAFDIW              | IGHJ3 | PB  | 400   |
| 57514 | 129 | Connecting to PB | CSF-SM_460_IGG   | IGHV4-59 | CARVYGGSLIFDYW              | IGHJ4 | CSF | 2     |
| 57514 | 129 | Connecting to PB | CSF-PC_120_IGG   | IGHV4-59 | CARVYGGSLIFDYW              | IGHJ4 | CSF | 9191  |
| 57514 | 129 | Connecting to PB | SM_95720_IGG     | IGHV4-59 | CARIYYDGNLIFDYW             | IGHJ4 | PB  | 1     |
| 57514 | 129 | Connecting to PB | SM_95720_IGG     | IGHV4-59 | CARIYYGGDLIFDYW             | IGHJ4 | PB  | 1     |
| 57514 | 129 | Connecting to PB | PC_1055_IGG      | IGHV4-59 | CARVYGGSLIFDYW              | IGHJ4 | PB  | 3     |
| 57514 | 129 | Connecting to PB | SM_95720_IGG     | IGHV4-59 | CARVYGGSLIFDYW              | IGHJ4 | PB  | 4     |
| 57514 | 129 | Connecting to PB | SM_95720_IGG     | IGHV4-59 | CARIYYGGNLIFDYW             | IGHJ4 | PB  | 10    |
| 57514 | 129 | Connecting to PB | SM_95720_IGG     | IGHV4-59 | CARVYGGNLIFDYW              | IGHJ4 | PB  | 10    |
| 57514 | 129 | Connecting to PB | SM_95720_IGG     | IGHV4-59 | CARVYGGSLIFDYW              | IGHJ4 | PB  | 46    |
| 57514 | 130 | Connecting to PB | CSF-PC_120_IGG   | IGHV4-55 | CASKQIFAPAAYW               | IGHJ4 | CSF | 4     |
| 57514 | 130 | Connecting to PB | SM_95720_IGG     | IGHV4-55 | CASKQIFAPAAYW               | IGHJ4 | PB  | 33    |
| 57514 | 130 | Connecting to PB | SM_95720_IGG     | IGHV4-55 | CASKQIFAPAAYW               | IGHJ4 | PB  | 2864  |
| 57514 | 130 | Connecting to PB | PC_1055_IGG      | IGHV4-55 | CASKQIFAPAAYW               | IGHJ4 | PB  | 7877  |
| 57514 | 131 | Connecting to PB | CSF-PC_120_IGG   | IGHV1-3  | CASSPYGDYVGLYGMVDVW         | IGHJ6 | CSF | 1     |
| 57514 | 131 | Connecting to PB | Naive_175179_IGM | IGHV1-3  | CASSPYGDYVGLYGMVDVW         | IGHJ6 | PB  | 3     |
| 57514 | 132 | Connecting to PB | CSF-PC_120_IGG   | IGHV1-3  | CATDPYGYKYFDYW              | IGHJ4 | CSF | 2     |
| 57514 | 132 | Connecting to PB | PC_1055_IGM      | IGHV1-3  | CATDPYGYKYFDYW              | IGHJ4 | PB  | 1     |
| 57514 | 132 | Connecting to PB | SM_95720_IGG     | IGHV1-3  | CAGDPYGYKGFDDYW             | IGHJ4 | PB  | 2     |
| 57514 | 132 | Connecting to PB | DN_18972_IGG     | IGHV1-3  | CATDPYGYKYFDYW              | IGHJ4 | PB  | 2     |
| 57514 | 132 | Connecting to PB | SM_95720_IGG     | IGHV1-3  | CARDPYGYKGFDDYW             | IGHJ4 | PB  | 6     |
| 57514 | 132 | Connecting to PB | SM_95720_IGG     | IGHV1-3  | CARDPYGYKGFDDYW             | IGHJ4 | PB  | 34    |
| 57514 | 132 | Connecting to PB | PC_1055_IGM      | IGHV1-3  | CATDPYGYKYFDYW              | IGHJ4 | PB  | 44    |
| 57514 | 132 | Connecting to PB | SM_95720_IGG     | IGHV1-3  | CATDPYGYKYFDYW              | IGHJ4 | PB  | 90    |
| 57514 | 132 | Connecting to PB | PC_1055_IGG      | IGHV1-3  | CATDPYGYKYFDYW              | IGHJ4 | PB  | 17572 |
| 57514 | 133 | CSF exclusive    | CSF-SM_460_IGG   | IGHV3-9  | CATGDFYD'TDYYPFDYW          | IGHJ4 | CSF | 15    |
| 57514 | 133 | CSF exclusive    | CSF-PC_120_IGG   | IGHV3-9  | CATGDFYD'TDYYPFDYW          | IGHJ4 | CSF | 55    |
| 57514 | 134 | Connecting to PB | CSF-PC_120_IGG   | IGHV2-5  | CGHSSGYRLLDYW               | IGHJ4 | CSF | 1     |
| 57514 | 134 | Connecting to PB | SM_95720_IGM     | IGHV2-5  | CGRSSGYRLLDYW               | IGHJ4 | PB  | 1     |
| 57514 | 134 | Connecting to PB | SM_95720_IGM     | IGHV2-5  | CGHSSGYRLLDYW               | IGHJ4 | PB  | 6     |
| 57514 | 134 | Connecting to PB | SM_95720_IGG     | IGHV2-5  | CGHSSGYRLLDYW               | IGHJ4 | PB  | 2173  |
| 57514 | 135 | Connecting to PB | CSF-PC_120_IGG   | IGHV3-15 | CHTPYCNNGRCYGYW             | IGHJ4 | CSF | 1     |
| 57514 | 135 | Connecting to PB | PC_1055_IGM      | IGHV3-15 | CHTPYCNNGRCYGYW             | IGHJ4 | PB  | 1     |
| 57514 | 135 | Connecting to PB | PC_1055_IGG      | IGHV3-15 | CHTPYCNNGRCYGYW             | IGHJ4 | PB  | 602   |
| 57514 | 136 | CSF exclusive    | CSF-PC_120_IGG   | IGHV3-9  | CRSGDYFD'TSDPYYPFDYW        | IGHJ4 | CSF | 970   |
| 57514 | 137 | CSF exclusive    | CSF-PC_120_IGG   | IGHV1-69 | CSRVTWDYAYGMDVW             | IGHJ6 | CSF | 25    |
| 57514 | 138 | Connecting to PB | CSF-PC_120_IGG   | IGHV2-5  | CVHRVPGAATSGWPLDFW          | IGHJ4 | CSF | 4     |
| 57514 | 138 | Connecting to PB | CSF-PC_120_IGG   | IGHV2-5  | CVHRVPGAATSGWPLDFW          | IGHJ4 | CSF | 4453  |
| 57514 | 138 | Connecting to PB | SM_95720_IGG     | IGHV2-5  | CVHRVPGAATSGWPLDFW          | IGHJ4 | PB  | 16    |
| 57514 | 138 | Connecting to PB | DN_18972_IGG     | IGHV2-5  | CVHRVPGAATSGWPLDFW          | IGHJ4 | PB  | 69    |
| 57514 | 139 | CSF exclusive    | CSF-PC_120_IGG   | IGHV2-5  | RVHRVPGAATSGWPLDLW          | IGHJ5 | CSF | 1     |
| 57514 | 140 | CSF exclusive    | CSF-SM_460_IGG   | IGHV1-69 | CAGHFPNSTAWY'TNTFDIW        | IGHJ3 | CSF | 18    |
| 57514 | 141 | Connecting to PB | CSF-SM_460_IGG   | IGHV3-11 | CAGIVGATRNYYYYGTDVW         | IGHJ6 | CSF | 14    |
| 57514 | 141 | Connecting to PB | USM_84463_IGM    | IGHV3-11 | CAGIVGASRNYYYYGMDVW         | IGHJ6 | PB  | 1     |
| 57514 | 142 | Connecting to PB | CSF-SM_460_IGG   | IGHV2-5  | CAHRREAYCGDDCYSSFFDNW       | IGHJ4 | CSF | 25    |
| 57514 | 142 | Connecting to PB | SM_95720_IGG     | IGHV2-5  | CAHRREAYCGDDCYSSFFDNW       | IGHJ4 | PB  | 1     |

|       |     |                  |                |          |                            |       |     |      |
|-------|-----|------------------|----------------|----------|----------------------------|-------|-----|------|
| 57514 | 143 | CSF exclusive    | CSF-SM_460_IGG | IGHV1-2  | CAIMDYGGNSSW               | IGHJ5 | CSF | 1    |
| 57514 | 144 | CSF exclusive    | CSF-SM_460_IGG | IGHV1-2  | CAIVDYGGNSFW               | IGHJ4 | CSF | 699  |
| 57514 | 145 | Connecting to PB | CSF-SM_460_IGG | IGHV3-9  | CAKDESLGAYGYFDSW           | IGHJ4 | CSF | 7    |
| 57514 | 145 | Connecting to PB | SM_95720_IGG   | IGHV3-9  | CAKDESLGAYGYFDSW           | IGHJ4 | PB  | 4    |
| 57514 | 146 | CSF exclusive    | CSF-SM_460_IGG | IGHV3-30 | CAKDFRSRIEFWLVDYW          | IGHJ4 | CSF | 11   |
| 57514 | 147 | CSF exclusive    | CSF-SM_460_IGG | IGHV3-23 | CAKDMSSVVTLLIDQGMVDW       | IGHJ6 | CSF | 7    |
| 57514 | 148 | Connecting to PB | CSF-SM_460_IGG | IGHV3-9  | CAKDMYYSGRNHYGMDVW         | IGHJ6 | CSF | 1    |
| 57514 | 148 | Connecting to PB | DN_18972_IGG   | IGHV3-9  | CAKDMYYSGRNHYGMDVW         | IGHJ6 | PB  | 21   |
| 57514 | 149 | Connecting to PB | CSF-SM_460_IGG | IGHV3-30 | CAKDRSRIEFWLVDYW           | IGHJ4 | CSF | 25   |
| 57514 | 149 | Connecting to PB | CSF-SM_460_IGG | IGHV3-30 | CAKDRSRIEFWLVDYW           | IGHJ4 | CSF | 7356 |
| 57514 | 149 | Connecting to PB | PC_1055_IGG    | IGHV3-30 | CAKDRSRIEFWLVDYW           | IGHJ4 | PB  | 2    |
| 57514 | 149 | Connecting to PB | SM_95720_IGG   | IGHV3-30 | CAKDRSRIEFWLVDYW           | IGHJ4 | PB  | 19   |
| 57514 | 149 | Connecting to PB | DN_18972_IGG   | IGHV3-30 | CAKDRSRIEFWLVDYW           | IGHJ4 | PB  | 25   |
| 57514 | 150 | Connecting to PB | CSF-SM_460_IGG | IGHV3-23 | CAKDRYSYINAEIGGYFDCW       | IGHJ4 | CSF | 3    |
| 57514 | 150 | Connecting to PB | SM_95720_IGG   | IGHV3-23 | CAKDRYSYINAEIGGYFDCW       | IGHJ4 | PB  | 2    |
| 57514 | 151 | CSF exclusive    | CSF-SM_460_IGG | IGHV3-9  | CAKDTTRSVCYSGGSCYSHYYGMDVW | IGHJ6 | CSF | 20   |
| 57514 | 152 | CSF exclusive    | CSF-SM_460_IGG | IGHV3-30 | CAKDWRSRIEFLVDCW           | IGHJ4 | CSF | 1    |
| 57514 | 153 | CSF exclusive    | CSF-SM_460_IGG | IGHV3-9  | CAKEYSRQLVLGDAFDIW         | IGHJ3 | CSF | 9    |
| 57514 | 154 | CSF exclusive    | CSF-SM_460_IGG | IGHV3-30 | CAKESLRYFDYW               | IGHJ4 | CSF | 17   |
| 57514 | 155 | CSF exclusive    | CSF-SM_460_IGG | IGHV3-43 | CAKGLPYDTSGYYPDLHW         | IGHJ4 | CSF | 7    |
| 57514 | 156 | Connecting to PB | CSF-SM_460_IGG | IGHV3-9  | CAKGGSGAFDYW               | IGHJ4 | CSF | 1884 |
| 57514 | 156 | Connecting to PB | SM_95720_IGG   | IGHV3-9  | CAKGGSGAFDYW               | IGHJ4 | PB  | 3    |
| 57514 | 157 | CSF exclusive    | CSF-SM_460_IGG | IGHV3-23 | CAKLPASWYDYVDIWI           | IGHJ3 | CSF | 2    |
| 57514 | 157 | CSF exclusive    | CSF-SM_460_IGG | IGHV3-23 | CAKLPASWYDAYDIWI           | IGHJ3 | CSF | 31   |
| 57514 | 158 | CSF exclusive    | CSF-SM_460_IGG | IGHV3-48 | CAKMFSLRSLEWHTNWFDPW       | IGHJ5 | CSF | 8    |
| 57514 | 159 | Connecting to PB | CSF-SM_460_IGG | IGHV4-34 | CAMKRGNYGSGNELW            | IGHJ1 | CSF | 1    |
| 57514 | 159 | Connecting to PB | SM_95720_IGG   | IGHV4-34 | CAMKRGNYGSGNEHW            | IGHJ1 | PB  | 4    |
| 57514 | 159 | Connecting to PB | PC_1055_IGM    | IGHV4-34 | CAMKRGNYGSGNEHW            | IGHJ1 | PB  | 6    |
| 57514 | 159 | Connecting to PB | PC_1055_IGG    | IGHV4-34 | CAMKRGNYGSGNEHW            | IGHJ1 | PB  | 4560 |
| 57514 | 160 | Connecting to PB | CSF-SM_460_IGG | IGHV1-69 | CANQAATRDFDLW              | IGHJ4 | CSF | 95   |
| 57514 | 160 | Connecting to PB | SM_95720_IGG   | IGHV1-69 | CANQAATRDFDNW              | IGHJ4 | PB  | 6    |
| 57514 | 161 | Connecting to PB | CSF-SM_460_IGG | IGHV4-59 | CARAPSTDIAIADVGFDIW        | IGHJ3 | CSF | 211  |
| 57514 | 161 | Connecting to PB | SM_95720_IGG   | IGHV4-59 | CARAPSTDIAIADVGFDIW        | IGHJ3 | PB  | 51   |
| 57514 | 162 | CSF exclusive    | CSF-SM_460_IGG | IGHV3-73 | CARAVAVAGTLLDYYQMDVW       | IGHJ6 | CSF | 4    |
| 57514 | 163 | CSF exclusive    | CSF-SM_460_IGG | IGHV4-4  | CARDAYDYSADWYFDYW          | IGHJ4 | CSF | 20   |
| 57514 | 164 | CSF exclusive    | CSF-SM_460_IGG | IGHV3-7  | CARDFNIDYVSNMGMDVW         | IGHJ6 | CSF | 17   |
| 57514 | 165 | CSF exclusive    | CSF-SM_460_IGG | IGHV4-4  | CARDLEPPSLHSYGLDVGW        | IGHJ6 | CSF | 1    |
| 57514 | 165 | CSF exclusive    | CSF-SM_460_IGG | IGHV4-4  | CARDLGPPLHSYGLDVGW         | IGHJ6 | CSF | 123  |
| 57514 | 166 | CSF exclusive    | CSF-SM_460_IGG | IGHV1-46 | CARDLNDISRPLQWAFDDW        | IGHJ4 | CSF | 136  |
| 57514 | 167 | CSF exclusive    | CSF-SM_460_IGG | IGHV4-34 | CARDWAGAHGGNYGTDVW         | IGHJ6 | CSF | 1    |
| 57514 | 167 | CSF exclusive    | CSF-SM_460_IGG | IGHV4-34 | CARDRAGAHGGNYGMDVW         | IGHJ6 | CSF | 63   |
| 57514 | 168 | CSF exclusive    | CSF-SM_460_IGG | IGHV3-48 | CARDRRGTIFGEVILYGLDVGW     | IGHJ6 | CSF | 4    |
| 57514 | 169 | Connecting to PB | CSF-SM_460_IGG | IGHV4-59 | CARDVGPQSHHAFDIW           | IGHJ3 | CSF | 1    |
| 57514 | 169 | Connecting to PB | SM_95720_IGG   | IGHV4-59 | CARDVGPQSHHAFDIW           | IGHJ3 | PB  | 2300 |
| 57514 | 170 | Connecting to PB | CSF-SM_460_IGG | IGHV1-2  | CARDWDVLLVPPSKGRFW         | IGHJ4 | CSF | 25   |
| 57514 | 170 | Connecting to PB | SM_95720_IGG   | IGHV1-2  | CARDWDVLLVPPSKGRFW         | IGHJ4 | PB  | 9    |
| 57514 | 170 | Connecting to PB | SM_95720_IGG   | IGHV1-2  | CARDWDILVPPSKGRFW          | IGHJ4 | PB  | 10   |
| 57514 | 171 | CSF exclusive    | CSF-SM_460_IGG | IGHV3-7  | CAREGGFYDNDYFYFDYW         | IGHJ4 | CSF | 3    |
| 57514 | 172 | CSF exclusive    | CSF-SM_460_IGG | IGHV4-4  | CAREVDHDTGGWFGAFDSW        | IGHJ4 | CSF | 85   |
| 57514 | 173 | Connecting to PB | CSF-SM_460_IGG | IGHV3-43 | CAREVLGYTAYW               | IGHJ4 | CSF | 10   |
| 57514 | 173 | Connecting to PB | SM_95720_IGM   | IGHV3-43 | CAREVHGTYAYW               | IGHJ4 | PB  | 1    |
| 57514 | 173 | Connecting to PB | SM_95720_IGG   | IGHV3-43 | CAREVLGYTAYW               | IGHJ4 | PB  | 2    |
| 57514 | 174 | CSF exclusive    | CSF-SM_460_IGG | IGHV3-7  | CAREWHILVIPFDYW            | IGHJ4 | CSF | 11   |
| 57514 | 175 | CSF exclusive    | CSF-SM_460_IGG | IGHV4-34 | CARFGRGFYFAGW              | IGHJ5 | CSF | 154  |
| 57514 | 176 | CSF exclusive    | CSF-SM_460_IGG | IGHV4-55 | CARGEGRGLGELSYTGDFDW       | IGHJ4 | CSF | 34   |
| 57514 | 177 | CSF exclusive    | CSF-SM_460_IGG | IGHV7-81 | CARGVAATGTPDW              | IGHJ5 | CSF | 3    |
| 57514 | 177 | CSF exclusive    | CSF-SM_460_IGM | IGHV7-81 | CARGVAATGTPDW              | IGHJ5 | CSF | 1323 |
| 57514 | 178 | Connecting to PB | CSF-SM_460_IGG | IGHV2-26 | CARIEGWGTEFDYW             | IGHJ4 | CSF | 192  |
| 57514 | 178 | Connecting to PB | USM_84463_IGM  | IGHV2-26 | CARIEGWGTEFDHW             | IGHJ4 | PB  | 5    |
| 57514 | 178 | Connecting to PB | SM_95720_IGG   | IGHV2-26 | CAGIEGWGTEFAYW             | IGHJ4 | PB  | 18   |
| 57514 | 178 | Connecting to PB | SM_95720_IGG   | IGHV2-26 | CARIEGWGTEFDYW             | IGHJ4 | PB  | 64   |
| 57514 | 179 | CSF exclusive    | CSF-SM_460_IGG | IGHV2-70 | CARIMYSSGWPEYWFDPW         | IGHJ5 | CSF | 166  |
| 57514 | 180 | CSF exclusive    | CSF-SM_460_IGG | IGHV4-34 | CARIYDYVWGSYRTDAFDIW       | IGHJ3 | CSF | 225  |
| 57514 | 181 | CSF exclusive    | CSF-SM_460_IGG | IGHV3-48 | CARLEDWNDPDPHYYYGMDVW      | IGHJ6 | CSF | 1    |
| 57514 | 182 | CSF exclusive    | CSF-SM_460_IGG | IGHV2-26 | CARLETADPNWHFDLW           | IGHJ2 | CSF | 56   |
| 57514 | 183 | CSF exclusive    | CSF-SM_460_IGG | IGHV3-7  | CARLGYSDNGTYYPDLDSW        | IGHJ4 | CSF | 3    |
| 57514 | 183 | CSF exclusive    | CSF-SM_460_IGG | IGHV3-7  | CARLGYSDNGTYYPSPDFSW       | IGHJ4 | CSF | 23   |
| 57514 | 184 | CSF exclusive    | CSF-SM_460_IGG | IGHV1-18 | CARLTRHSTGWSYYYYSMDVW      | IGHJ6 | CSF | 255  |
| 57514 | 185 | CSF exclusive    | CSF-SM_460_IGG | IGHV4-39 | RARPAYGASSYLDYW            | IGHJ4 | CSF | 1    |
| 57514 | 185 | CSF exclusive    | CSF-SM_460_IGG | IGHV4-39 | CARPAYGASSYFDYW            | IGHJ4 | CSF | 65   |
| 57514 | 186 | CSF exclusive    | CSF-SM_460_IGG | IGHV7-81 | CARPSLHGWFYFFQYW           | IGHJ4 | CSF | 20   |
| 57514 | 187 | CSF exclusive    | CSF-SM_460_IGG | IGHV4-4  | CARQRVVFTIPNGMDVW          | IGHJ6 | CSF | 426  |
| 57514 | 188 | Connecting to PB | CSF-SM_460_IGG | IGHV4-39 | CARRLSGYSYGAFDIW           | IGHJ3 | CSF | 111  |
| 57514 | 188 | Connecting to PB | SM_95720_IGG   | IGHV4-39 | CARRHSGYSYGAFDIW           | IGHJ3 | PB  | 7    |
| 57514 | 188 | Connecting to PB | SM_95720_IGG   | IGHV4-39 | CARRNSGYSYGAFDIW           | IGHJ3 | PB  | 18   |
| 57514 | 188 | Connecting to PB | SM_95720_IGG   | IGHV4-39 | CARRLSGYSYGAFDIW           | IGHJ3 | PB  | 23   |
| 57514 | 188 | Connecting to PB | SM_95720_IGG   | IGHV4-39 | CARRLSGYSYGAFDIW           | IGHJ3 | PB  | 28   |
| 57514 | 189 | CSF exclusive    | CSF-SM_460_IGG | IGHV1-3  | CARSFRYSSGWNIGYHYAMDVW     | IGHJ6 | CSF | 283  |
| 57514 | 190 | CSF exclusive    | CSF-SM_460_IGG | IGHV5-51 | CARSGLYYDSSPNWFAPW         | IGHJ5 | CSF | 33   |
| 57514 | 191 | CSF exclusive    | CSF-SM_460_IGG | IGHV1-8  | CARSKLGTGADFDYW            | IGHJ4 | CSF | 39   |
| 57514 | 192 | Connecting to PB | CSF-SM_460_IGG | IGHV1-2  | CARSTEVSSTRRPYEYW          | IGHJ4 | CSF | 1    |
| 57514 | 192 | Connecting to PB | CSF-SM_460_IGM | IGHV1-2  | CARSTEVSSTRRPYEYW          | IGHJ4 | CSF | 788  |
| 57514 | 192 | Connecting to PB | USM_84463_IGM  | IGHV1-2  | CARSTEISETTRRPYEYW         | IGHJ4 | PB  | 7    |
| 57514 | 193 | CSF exclusive    | CSF-SM_460_IGG | IGHV4-59 | CARTAIGRIPMVRGAQGGGLDVW    | IGHJ6 | CSF | 56   |
| 57514 | 194 | Connecting to PB | CSF-SM_460_IGG | IGHV1-69 | CARTLEMVHNWFDPW            | IGHJ5 | CSF | 1    |



|       |     |                  |                 |          |                          |       |     |      |
|-------|-----|------------------|-----------------|----------|--------------------------|-------|-----|------|
| 57514 | 194 | Connecting to PB | PC_1055_IGG     | IGHV1-69 | CARTLEMVHNWFDPW          | IGHJ5 | PB  | 1    |
| 57514 | 194 | Connecting to PB | DN_18972_IGG    | IGHV1-69 | CARTLEMVHNWFDPW          | IGHJ5 | PB  | 212  |
| 57514 | 195 | CSF exclusive    | CSF-SM_460_IGG  | IGHV1-8  | CARVLYSYASDNW            | IGHJ4 | CSF | 19   |
| 57514 | 196 | Connecting to PB | CSF-SM_460_IGG  | IGHV3-21 | CARVWVAASLVLDYHYYYAMDVW  | IGHJ6 | CSF | 1    |
| 57514 | 196 | Connecting to PB | SM_95720_IGG    | IGHV3-21 | CARVWVAASLVLDYHYYYAMDVW  | IGHJ6 | PB  | 1    |
| 57514 | 197 | CSF exclusive    | CSF-SM_460_IGG  | IGHV3-30 | CARYFYDNGASGADYW         | IGHJ4 | CSF | 15   |
| 57514 | 198 | Connecting to PB | CSF-SM_460_IGG  | IGHV2-5  | CARYMPAVTTYDYW           | IGHJ4 | CSF | 764  |
| 57514 | 198 | Connecting to PB | SM_95720_IGM    | IGHV2-5  | CARYMPTVTTYDYW           | IGHJ4 | PB  | 1    |
| 57514 | 198 | Connecting to PB | SM_95720_IGG    | IGHV2-5  | CARYMSTVTSYGYW           | IGHJ4 | PB  | 1    |
| 57514 | 198 | Connecting to PB | SM_95720_IGG    | IGHV2-5  | CARYMSTVTTYNYW           | IGHJ4 | PB  | 1    |
| 57514 | 198 | Connecting to PB | SM_95720_IGG    | IGHV2-5  | CARYTSTVTSYDYW           | IGHJ4 | PB  | 1    |
| 57514 | 198 | Connecting to PB | SM_95720_IGG    | IGHV2-5  | CARYMPAVTTYDYW           | IGHJ4 | PB  | 3    |
| 57514 | 198 | Connecting to PB | SM_95720_IGG    | IGHV2-5  | CARYMSTVTSYDYW           | IGHJ4 | PB  | 23   |
| 57514 | 198 | Connecting to PB | SM_95720_IGG    | IGHV2-5  | CARYMPTVTTYDYW           | IGHJ4 | PB  | 93   |
| 57514 | 198 | Connecting to PB | SM_95720_IGG    | IGHV2-5  | CARYMSTVTTYDYW           | IGHJ4 | PB  | 137  |
| 57514 | 199 | CSF exclusive    | CSF-SM_460_IGG  | IGHV4-39 | CASEFSGSNYYW             | IGHJ4 | CSF | 3    |
| 57514 | 200 | CSF exclusive    | CSF-SM_460_IGG  | IGHV4-39 | CASEFSGSNYYYW            | IGHJ4 | CSF | 425  |
| 57514 | 201 | CSF exclusive    | CSF-SM_460_IGG  | IGHV3-7  | CASGSGWVSEHW             | IGHJ1 | CSF | 8    |
| 57514 | 202 | CSF exclusive    | CSF-SM_460_IGG  | IGHV4-4  | CASLGYSSSADYW            | IGHJ4 | CSF | 450  |
| 57514 | 203 | CSF exclusive    | CSF-SM_460_IGG  | IGHV4-59 | CATGLTTRVPPAFDITW        | IGHJ3 | CSF | 4    |
| 57514 | 203 | CSF exclusive    | CSF-SM_460_IGG  | IGHV4-59 | CATGLTTRVPPAFDITW        | IGHJ3 | CSF | 32   |
| 57514 | 204 | Connecting to PB | CSF-SM_460_IGG  | IGHV7-81 | CAVEAYSYSWYVGWNW         | IGHJ4 | CSF | 742  |
| 57514 | 204 | Connecting to PB | SM_95720_IGG    | IGHV7-81 | CAVEAYSYSWYVGWNW         | IGHJ4 | PB  | 1    |
| 57514 | 205 | Connecting to PB | CSF-SM_460_IGG  | IGHV3-73 | CFSVLGAERDW              | IGHJ4 | CSF | 1    |
| 57514 | 205 | Connecting to PB | PC_1055_IGG     | IGHV3-73 | CFSVLGAERDW              | IGHJ4 | PB  | 651  |
| 57514 | 206 | CSF exclusive    | CSF-SM_460_IGG  | IGHV1-46 | CGRDRRPFYDWSGVDW         | IGHJ4 | CSF | 11   |
| 57514 | 206 | CSF exclusive    | CSF-SM_460_IGG  | IGHV1-46 | CGRDRRPFYDWSGIDDW        | IGHJ4 | CSF | 41   |
| 57514 | 207 | Connecting to PB | CSF-SM_460_IGG  | IGHV3-48 | CVRDPLWFGEISEEPSW        | IGHJ5 | CSF | 1    |
| 57514 | 207 | Connecting to PB | SM_95720_IGG    | IGHV3-48 | CVRDPLWFGEISEEPSW        | IGHJ5 | PB  | 10   |
| 57514 | 207 | Connecting to PB | PC_1055_IGG     | IGHV3-48 | CVRDPLWFGEISEEPSW        | IGHJ5 | PB  | 509  |
| 57514 | 208 | CSF exclusive    | CSF-SM_460_IGG  | IGHV1-69 | CVREVGGLLWDPW            | IGHJ5 | CSF | 145  |
| 57514 | 209 | CSF exclusive    | CSF-SM_460_IGG  | IGHV3-7  | CVRHGEGAGGDYW            | IGHJ4 | CSF | 35   |
| 57514 | 210 | CSF exclusive    | CSF-SM_460_IGM  | IGHV1-2  | CAGGGIGGYDGGDHW          | IGHJ5 | CSF | 24   |
| 57514 | 211 | CSF exclusive    | CSF-SM_460_IGM  | IGHV2-5  | CAHRRVQRTSLWFGVYGMVDW    | IGHJ6 | CSF | 6    |
| 57514 | 211 | CSF exclusive    | CSF-USM_142_IGM | IGHV2-5  | CAHRRVQRTSLWFGVYGMVDW    | IGHJ6 | CSF | 2335 |
| 57514 | 212 | Connecting to PB | CSF-SM_460_IGM  | IGHV3-23 | CAKEIVGPGVADYW           | IGHJ4 | CSF | 1    |
| 57514 | 212 | Connecting to PB | CSF-USM_142_IGM | IGHV3-23 | CAKEIVGPGVADYW           | IGHJ4 | CSF | 2    |
| 57514 | 212 | Connecting to PB | CSF-USM_142_IGM | IGHV3-23 | CAKEIVGPGVADYW           | IGHJ4 | CSF | 34   |
| 57514 | 212 | Connecting to PB | CSF-USM_142_IGM | IGHV3-23 | CAKEIVGPGVADYW           | IGHJ4 | CSF | 343  |
| 57514 | 212 | Connecting to PB | USM_84463_IGM   | IGHV3-23 | CAKEIVGPGVADNW           | IGHJ4 | PB  | 1    |
| 57514 | 213 | Connecting to PB | CSF-SM_460_IGM  | IGHV3-23 | CAKELQSGTYYPFDYW         | IGHJ4 | CSF | 5    |
| 57514 | 213 | Connecting to PB | SM_95720_IGG    | IGHV3-23 | CAKELSGRHPYFDYW          | IGHJ4 | PB  | 2    |
| 57514 | 213 | Connecting to PB | USM_84463_IGM   | IGHV3-23 | CAKELSGTYYPFDYW          | IGHJ4 | PB  | 4    |
| 57514 | 213 | Connecting to PB | SM_95720_IGM    | IGHV3-23 | CAKELQSGRHPYLDYW         | IGHJ4 | PB  | 4    |
| 57514 | 213 | Connecting to PB | USM_84463_IGM   | IGHV3-23 | CAKELQSGRYYPFDYW         | IGHJ4 | PB  | 5    |
| 57514 | 214 | CSF exclusive    | CSF-SM_460_IGM  | IGHV3-23 | CAKGGWFGESFDYW           | IGHJ4 | CSF | 62   |
| 57514 | 215 | CSF exclusive    | CSF-SM_460_IGM  | IGHV3-23 | CAKRSHRDDYWASFDIW        | IGHJ3 | CSF | 8    |
| 57514 | 216 | Connecting to PB | CSF-SM_460_IGM  | IGHV1-3  | CARAPPSSWGYLDNW          | IGHJ4 | CSF | 1    |
| 57514 | 216 | Connecting to PB | USM_84463_IGM   | IGHV1-3  | CARAPPSSWGYLDNW          | IGHJ4 | PB  | 47   |
| 57514 | 216 | Connecting to PB | SM_95720_IGM    | IGHV1-3  | CARAPPSSWGYLDNW          | IGHJ4 | PB  | 179  |
| 57514 | 217 | CSF exclusive    | CSF-SM_460_IGM  | IGHV3-11 | CARDCGYSSGQRDGYW         | IGHJ4 | CSF | 14   |
| 57514 | 218 | CSF exclusive    | CSF-SM_460_IGM  | IGHV3-30 | CARDDRGWYVVDW            | IGHJ5 | CSF | 9    |
| 57514 | 219 | CSF exclusive    | CSF-SM_460_IGM  | IGHV1-18 | CARDGYCSSTSCYADYYYYGMDVW | IGHJ6 | CSF | 1    |
| 57514 | 219 | CSF exclusive    | CSF-USM_142_IGM | IGHV1-18 | CARDGYCSSTSCYADYYYYGMDVW | IGHJ6 | CSF | 504  |
| 57514 | 220 | Connecting to PB | CSF-SM_460_IGM  | IGHV1-2  | CARDHPDCSDSNCTW          | IGHJ5 | CSF | 1    |
| 57514 | 220 | Connecting to PB | CSF-USM_142_IGM | IGHV1-2  | CARDHPDCSDSNCTW          | IGHJ5 | CSF | 237  |
| 57514 | 220 | Connecting to PB | USM_84463_IGM   | IGHV1-2  | CARDHPDCSDSGCTW          | IGHJ5 | PB  | 3    |
| 57514 | 220 | Connecting to PB | USM_84463_IGM   | IGHV1-2  | CARDHEDCTDSSCTW          | IGHJ5 | PB  | 4    |
| 57514 | 220 | Connecting to PB | USM_84463_IGM   | IGHV1-2  | CARDHEDCRDNSCTW          | IGHJ5 | PB  | 5    |
| 57514 | 220 | Connecting to PB | USM_84463_IGM   | IGHV1-2  | CARDHEDCTDSSCTW          | IGHJ5 | PB  | 8    |
| 57514 | 221 | Connecting to PB | CSF-SM_460_IGM  | IGHV4-59 | CARDIGGWYGGDYW           | IGHJ4 | CSF | 38   |
| 57514 | 221 | Connecting to PB | USM_84463_IGM   | IGHV4-59 | CARDIGGWYGGDYW           | IGHJ4 | PB  | 5    |
| 57514 | 222 | CSF exclusive    | CSF-SM_460_IGM  | IGHV3-53 | CARDRTSSAESNFPDVFDIW     | IGHJ3 | CSF | 63   |
| 57514 | 223 | CSF exclusive    | CSF-SM_460_IGM  | IGHV4-39 | CARENCGGGCYSIDYW         | IGHJ4 | CSF | 1    |
| 57514 | 224 | Connecting to PB | CSF-SM_460_IGM  | IGHV4-59 | CARENCSGGGCYSIDYW        | IGHJ4 | CSF | 106  |
| 57514 | 224 | Connecting to PB | USM_84463_IGM   | IGHV4-59 | CARESCSGGCYSIDYW         | IGHJ4 | PB  | 2    |
| 57514 | 225 | Connecting to PB | CSF-USM_142_IGM | IGHV3-7  | CTRERPFASAFDIR           | IGHJ3 | CSF | 2    |
| 57514 | 225 | Connecting to PB | CSF-SM_460_IGM  | IGHV3-7  | CARERPFASAFDIW           | IGHJ3 | CSF | 53   |
| 57514 | 225 | Connecting to PB | CSF-USM_142_IGM | IGHV3-7  | CARERPFASAFDIW           | IGHJ3 | CSF | 167  |
| 57514 | 225 | Connecting to PB | USM_84463_IGM   | IGHV3-7  | CARERPFASAFDIW           | IGHJ3 | PB  | 1    |
| 57514 | 225 | Connecting to PB | SM_95720_IGG    | IGHV3-7  | CARERPFASAFDIW           | IGHJ3 | PB  | 1    |
| 57514 | 226 | CSF exclusive    | CSF-SM_460_IGM  | IGHV6-1  | CARGGYGDYVFRFDYW         | IGHJ4 | CSF | 67   |
| 57514 | 227 | CSF exclusive    | CSF-SM_460_IGM  | IGHV4-59 | CARGNPFYSSSYGMDVW        | IGHJ6 | CSF | 2    |
| 57514 | 227 | CSF exclusive    | CSF-USM_142_IGM | IGHV4-59 | CARGNPFYSSSYGMDVW        | IGHJ6 | CSF | 729  |
| 57514 | 228 | Connecting to PB | CSF-SM_460_IGM  | IGHV1-18 | CARGPKSSSGSPIWYW         | IGHJ4 | CSF | 159  |
| 57514 | 228 | Connecting to PB | USM_84463_IGM   | IGHV1-18 | CARGPKSSSGSPIWYW         | IGHJ4 | PB  | 42   |
| 57514 | 229 | CSF exclusive    | CSF-SM_460_IGM  | IGHV4-39 | CARGSDYGDHGYFQHW         | IGHJ1 | CSF | 26   |
| 57514 | 230 | CSF exclusive    | CSF-SM_460_IGM  | IGHV4-34 | CARGSGFWSGQWYGMVDW       | IGHJ6 | CSF | 16   |
| 57514 | 231 | CSF exclusive    | CSF-SM_460_IGM  | IGHV4-59 | CARGSGGSGSYFDYW          | IGHJ4 | CSF | 75   |
| 57514 | 232 | CSF exclusive    | CSF-SM_460_IGM  | IGHV3-7  | CARGTTETPGNDYW           | IGHJ4 | CSF | 6    |
| 57514 | 233 | Connecting to PB | CSF-SM_460_IGM  | IGHV7-81 | CARGWNYDSSGYRFDYW        | IGHJ4 | CSF | 3    |
| 57514 | 233 | Connecting to PB | CSF-USM_142_IGM | IGHV7-81 | CARGWNYDSSGYRFDYW        | IGHJ4 | CSF | 2680 |
| 57514 | 233 | Connecting to PB | USM_84463_IGM   | IGHV7-81 | CARGWNYDSSGYRFDYW        | IGHJ4 | PB  | 25   |
| 57514 | 234 | Connecting to PB | CSF-SM_460_IGM  | IGHV5-51 | CARGYCSGTSCYRFDW         | IGHJ4 | CSF | 2    |
| 57514 | 234 | Connecting to PB | CSF-USM_142_IGM | IGHV5-51 | CARGYCSGTSCYRFDW         | IGHJ4 | CSF | 165  |

|       |     |                  |                 |          |                       |       |     |      |
|-------|-----|------------------|-----------------|----------|-----------------------|-------|-----|------|
| 57514 | 234 | Connecting to PB | USM_84463_IGM   | IGHV5-51 | CARGHCSSTSCYRFDWW     | IGHJ4 | PB  | 1    |
| 57514 | 234 | Connecting to PB | USM_84463_IGM   | IGHV5-51 | CARGYCSRTSCYRFDYW     | IGHJ4 | PB  | 3    |
| 57514 | 234 | Connecting to PB | USM_84463_IGM   | IGHV5-51 | CARGYCSSTSCYRFDWW     | IGHJ4 | PB  | 7    |
| 57514 | 235 | Connecting to PB | CSF-SM_460_IGM  | IGHV3-23 | CARHWGSGKWYDYY        | IGHJ4 | CSF | 5    |
| 57514 | 235 | Connecting to PB | USM_84463_IGM   | IGHV3-23 | CARHWGSGRWYDYSW       | IGHJ4 | PB  | 2    |
| 57514 | 235 | Connecting to PB | USM_84463_IGM   | IGHV3-23 | CARHWGSGRWYDYY        | IGHJ4 | PB  | 3    |
| 57514 | 235 | Connecting to PB | USM_84463_IGM   | IGHV3-23 | CARHWGSGRWYDYY        | IGHJ4 | PB  | 5    |
| 57514 | 235 | Connecting to PB | SM_95720_IGM    | IGHV3-23 | CARHWGSGRWYDYY        | IGHJ4 | PB  | 9    |
| 57514 | 235 | Connecting to PB | SM_95720_IGM    | IGHV3-23 | CARHWGSGTWYDYY        | IGHJ4 | PB  | 10   |
| 57514 | 235 | Connecting to PB | USM_84463_IGM   | IGHV3-23 | CARHLGSGRWCLDYW       | IGHJ4 | PB  | 14   |
| 57514 | 235 | Connecting to PB | SM_95720_IGM    | IGHV3-23 | CGRHWGSGKWLYDYW       | IGHJ4 | PB  | 16   |
| 57514 | 235 | Connecting to PB | USM_84463_IGM   | IGHV3-23 | CARHWGSGKWYDYY        | IGHJ4 | PB  | 17   |
| 57514 | 235 | Connecting to PB | SM_95720_IGM    | IGHV3-23 | CARHWGSGKWYDYY        | IGHJ4 | PB  | 22   |
| 57514 | 235 | Connecting to PB | SM_95720_IGM    | IGHV3-23 | CARHLGSGRWCLDYW       | IGHJ4 | PB  | 29   |
| 57514 | 235 | Connecting to PB | SM_95720_IGM    | IGHV3-23 | CARHWGSGKWYDYY        | IGHJ4 | PB  | 42   |
| 57514 | 235 | Connecting to PB | USM_84463_IGM   | IGHV3-23 | CARHWGSGKWYDYY        | IGHJ4 | PB  | 43   |
| 57514 | 236 | CSF exclusive    | CSF-SM_460_IGM  | IGHV2-26 | CARIENGRGRPVIPAPFDYW  | IGHJ4 | CSF | 1538 |
| 57514 | 237 | Connecting to PB | CSF-SM_460_IGM  | IGHV1-3  | CARKGYFASGHYSDFDYW    | IGHJ4 | CSF | 512  |
| 57514 | 237 | Connecting to PB | USM_84463_IGM   | IGHV1-3  | CARKDYFASGHYSDFDYW    | IGHJ4 | PB  | 6    |
| 57514 | 237 | Connecting to PB | USM_84463_IGM   | IGHV1-3  | CARKGYFSSGHYSDFDYW    | IGHJ4 | PB  | 13   |
| 57514 | 237 | Connecting to PB | SM_95720_IGG    | IGHV1-3  | CARKGYFSSGHYSDFDYW    | IGHJ4 | PB  | 35   |
| 57514 | 237 | Connecting to PB | USM_84463_IGM   | IGHV1-3  | CARKGYFHSGHYSDFDYW    | IGHJ4 | PB  | 50   |
| 57514 | 238 | CSF exclusive    | CSF-SM_460_IGM  | IGHV6-1  | CARTLIAVAGTGFDPYW     | IGHJ4 | CSF | 4    |
| 57514 | 238 | CSF exclusive    | CSF-USM_142_IGM | IGHV6-1  | CARTLIAVAGTGFDPYW     | IGHJ4 | CSF | 1795 |
| 57514 | 239 | CSF exclusive    | CSF-SM_460_IGM  | IGHV3-7  | CARYSCTTTTCYLFDPYW    | IGHJ4 | CSF | 18   |
| 57514 | 240 | Connecting to PB | CSF-SM_460_IGM  | IGHV3-7  | CATAARGDNYGSSSW       | IGHJ5 | CSF | 7    |
| 57514 | 240 | Connecting to PB | SM_95720_IGG    | IGHV3-7  | CASAARGDNYGSSSLW      | IGHJ5 | PB  | 1    |
| 57514 | 240 | Connecting to PB | SM_95720_IGG    | IGHV3-7  | CASAARGDNYGSSSLW      | IGHJ5 | PB  | 3    |
| 57514 | 241 | Connecting to PB | CSF-USM_142_IGM | IGHV4-4  | CATGDTGGWSRINYW       | IGHJ4 | CSF | 3    |
| 57514 | 241 | Connecting to PB | CSF-SM_460_IGM  | IGHV4-4  | CATGDTSGWSGAINYW      | IGHJ4 | CSF | 4    |
| 57514 | 241 | Connecting to PB | CSF-USM_142_IGM | IGHV4-4  | CATGDTSGWSGAINYW      | IGHJ4 | CSF | 1125 |
| 57514 | 241 | Connecting to PB | USM_84463_IGM   | IGHV4-4  | CARGDTSWGSAIDYW       | IGHJ4 | PB  | 7    |
| 57514 | 242 | Connecting to PB | CSF-SM_460_IGM  | IGHV3-30 | CATVRGGYSGYCDYW       | IGHJ4 | CSF | 17   |
| 57514 | 242 | Connecting to PB | USM_84463_IGM   | IGHV3-30 | CATVRDGYSGYCDHW       | IGHJ4 | PB  | 1    |
| 57514 | 242 | Connecting to PB | USM_84463_IGM   | IGHV3-30 | CTTVRDGYSGYCDYW       | IGHJ4 | PB  | 2    |
| 57514 | 242 | Connecting to PB | USM_84463_IGM   | IGHV3-30 | CATVRDGYSGYCDYW       | IGHJ4 | PB  | 5    |
| 57514 | 242 | Connecting to PB | USM_84463_IGM   | IGHV3-30 | CATVRGGYSGYCDYW       | IGHJ4 | PB  | 9    |
| 57514 | 243 | CSF exclusive    | CSF-SM_460_IGM  | IGHV3-21 | CAYSLHYGDYPIYW        | IGHJ4 | CSF | 21   |
| 57514 | 244 | Connecting to PB | CSF-SM_460_IGM  | IGHV3-72 | CTRSGLLVRVIDLDYW      | IGHJ4 | CSF | 6    |
| 57514 | 244 | Connecting to PB | USM_84463_IGM   | IGHV3-72 | CTRSGLLVRVIDLDYW      | IGHJ4 | PB  | 3    |
| 57514 | 244 | Connecting to PB | USM_84463_IGM   | IGHV3-72 | CTRSGLLVRVIDLDYW      | IGHJ4 | PB  | 3    |
| 57514 | 245 | Connecting to PB | CSF-SM_460_IGM  | IGHV3-7  | CVRDYGPSDYW           | IGHJ4 | CSF | 46   |
| 57514 | 245 | Connecting to PB | USM_84463_IGM   | IGHV3-7  | CVRDYGPSDYW           | IGHJ4 | PB  | 1    |
| 57514 | 246 | Connecting to PB | CSF-SM_460_IGM  | IGHV1-46 | CVREMSGGTWDYW         | IGHJ4 | CSF | 227  |
| 57514 | 246 | Connecting to PB | USM_84463_IGM   | IGHV1-46 | CVREMSGGTWDYW         | IGHJ4 | PB  | 11   |
| 57514 | 247 | Connecting to PB | CSF-USM_142_IGM | IGHV2-5  | CAHIECAGCWIASW        | IGHJ4 | CSF | 21   |
| 57514 | 247 | Connecting to PB | USM_84463_IGM   | IGHV2-5  | CAHIECAGCWIDYW        | IGHJ4 | PB  | 12   |
| 57514 | 247 | Connecting to PB | USM_84463_IGM   | IGHV2-5  | CAHIECAGCWIAYW        | IGHJ4 | PB  | 19   |
| 57514 | 247 | Connecting to PB | USM_84463_IGM   | IGHV2-5  | CAHIECAGCWIDHW        | IGHJ4 | PB  | 21   |
| 57514 | 247 | Connecting to PB | SM_95720_IGM    | IGHV2-5  | CAYIECAGCWIDSW        | IGHJ4 | PB  | 202  |
| 57514 | 248 | CSF exclusive    | CSF-USM_142_IGM | IGHV2-5  | CAHKREETQRGVYHFDYW    | IGHJ4 | CSF | 1233 |
| 57514 | 249 | Connecting to PB | CSF-USM_142_IGM | IGHV2-5  | CAHRVTIVGPFDPW        | IGHJ4 | CSF | 182  |
| 57514 | 249 | Connecting to PB | USM_84463_IGM   | IGHV2-5  | CAHRVTIVGPFDPW        | IGHJ4 | PB  | 5    |
| 57514 | 250 | CSF exclusive    | CSF-USM_142_IGM | IGHV2-5  | CAHSYHYDYIWGSYRHSFDYW | IGHJ4 | CSF | 236  |
| 57514 | 251 | CSF exclusive    | CSF-USM_142_IGM | IGHV1-18 | CAIGGGVPAAPYSIDYW     | IGHJ4 | CSF | 44   |
| 57514 | 252 | Connecting to PB | CSF-USM_142_IGM | IGHV3-9  | CAKASTMILVLSLSDYW     | IGHJ4 | CSF | 144  |
| 57514 | 252 | Connecting to PB | USM_84463_IGM   | IGHV3-9  | CAKASTMILVLSLSDYW     | IGHJ4 | PB  | 16   |
| 57514 | 253 | CSF exclusive    | CSF-USM_142_IGM | IGHV3-9  | CAKIDGPDYYPGMVDW      | IGHJ6 | CSF | 375  |
| 57514 | 254 | CSF exclusive    | CSF-USM_142_IGM | IGHV3-9  | CAKDKGSSSWYAEDYW      | IGHJ4 | CSF | 30   |
| 57514 | 255 | CSF exclusive    | CSF-USM_142_IGM | IGHV3-23 | CAKDMAVAGTNDYFDYW     | IGHJ4 | CSF | 318  |
| 57514 | 256 | Connecting to PB | CSF-USM_142_IGM | IGHV3-23 | CAKDRDDYGDPAFDI W     | IGHJ3 | CSF | 8    |
| 57514 | 256 | Connecting to PB | USM_84463_IGM   | IGHV3-23 | CAKDRDDYGDPAFDVW      | IGHJ3 | PB  | 4    |
| 57514 | 257 | Connecting to PB | CSF-USM_142_IGM | IGHV3-30 | CAKDRHIVATTPDYW       | IGHJ4 | CSF | 83   |
| 57514 | 257 | Connecting to PB | SM_95720_IGM    | IGHV3-30 | CAKDRHIVATTPDYW       | IGHJ4 | PB  | 1    |
| 57514 | 258 | CSF exclusive    | CSF-USM_142_IGM | IGHV3-23 | CAKEARSTRDLYLEYW      | IGHJ4 | CSF | 16   |
| 57514 | 259 | CSF exclusive    | CSF-USM_142_IGM | IGHV3-23 | CAKEGGEAVAGRIPPHYW    | IGHJ4 | CSF | 115  |
| 57514 | 260 | CSF exclusive    | CSF-USM_142_IGM | IGHV3-23 | CAKGDYGEWFDPW         | IGHJ5 | CSF | 4    |
| 57514 | 261 | Connecting to PB | CSF-USM_142_IGM | IGHV3-23 | CAKGHDYQPDYW          | IGHJ4 | CSF | 292  |
| 57514 | 261 | Connecting to PB | USM_84463_IGM   | IGHV3-23 | CAKGHDYQFGHW          | IGHJ4 | PB  | 1    |
| 57514 | 261 | Connecting to PB | USM_84463_IGM   | IGHV3-23 | CARGPDYQPDYW          | IGHJ4 | PB  | 1    |
| 57514 | 261 | Connecting to PB | USM_84463_IGM   | IGHV3-23 | CAKGYDYQPGYW          | IGHJ4 | PB  | 2    |
| 57514 | 261 | Connecting to PB | USM_84463_IGM   | IGHV3-23 | CARGPDYQFGYW          | IGHJ4 | PB  | 3    |
| 57514 | 261 | Connecting to PB | USM_84463_IGM   | IGHV3-23 | CAKGPDYQPGYW          | IGHJ4 | PB  | 4    |
| 57514 | 261 | Connecting to PB | USM_84463_IGM   | IGHV3-23 | CARGHDYQPYW           | IGHJ4 | PB  | 7    |
| 57514 | 261 | Connecting to PB | USM_84463_IGM   | IGHV3-23 | CAKGHDYQPDYW          | IGHJ4 | PB  | 13   |
| 57514 | 262 | CSF exclusive    | CSF-USM_142_IGM | IGHV3-23 | CAKLTGTFTSRAFDNW      | IGHJ4 | CSF | 68   |
| 57514 | 263 | CSF exclusive    | CSF-USM_142_IGM | IGHV3-23 | CAKPDWTGSGYYPYFDLW    | IGHJ2 | CSF | 41   |
| 57514 | 264 | CSF exclusive    | CSF-USM_142_IGM | IGHV3-23 | CAKRGDLGGDLGKYPDTW    | IGHJ4 | CSF | 52   |
| 57514 | 265 | CSF exclusive    | CSF-USM_142_IGM | IGHV3-23 | CAKDMTGTGPDYDCW       | IGHJ4 | CSF | 161  |
| 57514 | 266 | Connecting to PB | CSF-USM_142_IGM | IGHV2-5  | CAQCSRFGEPLDYW        | IGHJ4 | CSF | 907  |
| 57514 | 266 | Connecting to PB | USM_84463_IGM   | IGHV2-5  | CAQCSRFGEPLDYW        | IGHJ4 | PB  | 10   |
| 57514 | 266 | Connecting to PB | USM_84463_IGM   | IGHV2-5  | CAQCSRFGEPLDYW        | IGHJ4 | PB  | 201  |
| 57514 | 267 | CSF exclusive    | CSF-USM_142_IGM | IGHV4-28 | CARAPPYDSSDYYPGVVDYW  | IGHJ4 | CSF | 1    |
| 57514 | 268 | CSF exclusive    | CSF-USM_142_IGM | IGHV4-59 | CARAGSSGWTW           | IGHJ5 | CSF | 316  |
| 57514 | 269 | Connecting to PB | CSF-USM_142_IGM | IGHV4-4  | CARDAYSTTWDSDFTW      | IGHJ4 | CSF | 25   |

|       |     |                  |                  |          |                             |       |     |      |
|-------|-----|------------------|------------------|----------|-----------------------------|-------|-----|------|
| 57514 | 269 | Connecting to PB | CSF-USM_142_IGM  | IGHV4-4  | CARDAYSTTWDSFDIW            | IGHJ4 | CSF | 529  |
| 57514 | 269 | Connecting to PB | SM_95720_IGM     | IGHV4-4  | CARDAYSTTWDSFDIW            | IGHJ4 | PB  | 1    |
| 57514 | 270 | Connecting to PB | CSF-USM_142_IGM  | IGHV4-4  | CARDAYYDTSGYVLDYW           | IGHJ4 | CSF | 1    |
| 57514 | 270 | Connecting to PB | USM_84463_IGM    | IGHV4-4  | CARDAYYDTSGYVLDYW           | IGHJ4 | PB  | 1    |
| 57514 | 270 | Connecting to PB | SM_95720_IGG     | IGHV4-4  | CARDAYYDTSGHYVIGYW          | IGHJ4 | PB  | 1    |
| 57514 | 270 | Connecting to PB | SM_95720_IGG     | IGHV4-4  | CARDAYYDTSGYLLTDYW          | IGHJ4 | PB  | 2    |
| 57514 | 270 | Connecting to PB | SM_95720_IGM     | IGHV4-4  | CARDAYYDTSGYVLDYW           | IGHJ4 | PB  | 5    |
| 57514 | 270 | Connecting to PB | USM_84463_IGM    | IGHV4-4  | CARDAYYDTSGYLLTDYW          | IGHJ4 | PB  | 9    |
| 57514 | 270 | Connecting to PB | USM_84463_IGM    | IGHV4-4  | CARDAYYDTSGYLLDYW           | IGHJ4 | PB  | 16   |
| 57514 | 270 | Connecting to PB | SM_95720_IGG     | IGHV4-4  | CARDAYYDTSGYVLDYW           | IGHJ4 | PB  | 33   |
| 57514 | 270 | Connecting to PB | SM_95720_IGG     | IGHV4-4  | CARDAYYDTSGYVLDYW           | IGHJ4 | PB  | 992  |
| 57514 | 270 | Connecting to PB | PC_1055_IGM      | IGHV4-4  | CARDAYYDTSGYLLDYW           | IGHJ4 | PB  | 1605 |
| 57514 | 270 | Connecting to PB | SM_95720_IGM     | IGHV4-4  | CARDAYYDTSGYLLTDYW          | IGHJ4 | PB  | 2633 |
| 57514 | 271 | CSF exclusive    | CSF-USM_142_IGM  | IGHV3-30 | CARDENDIAAAGTTRYYYGMDVW     | IGHJ6 | CSF | 81   |
| 57514 | 272 | Connecting to PB | CSF-USM_142_IGM  | IGHV1-18 | CARDEVAVAGKVEDCW            | IGHJ4 | CSF | 1    |
| 57514 | 272 | Connecting to PB | CSF-USM_142_IGM  | IGHV1-18 | CARDEVAVAGKAKDCW            | IGHJ4 | CSF | 264  |
| 57514 | 272 | Connecting to PB | USM_84463_IGM    | IGHV1-18 | CARDEVTVAGKAKDCW            | IGHJ4 | PB  | 2    |
| 57514 | 273 | Connecting to PB | CSF-USM_142_IGM  | IGHV3-7  | CARDGDDYGDFFDYW             | IGHJ4 | CSF | 204  |
| 57514 | 273 | Connecting to PB | USM_84463_IGM    | IGHV3-7  | CARDGADSGDDFDYW             | IGHJ4 | PB  | 2    |
| 57514 | 274 | CSF exclusive    | CSF-USM_142_IGM  | IGHV1-18 | CARDGYCSSTSCYADYYGMNVW      | IGHJ6 | CSF | 1    |
| 57514 | 274 | CSF exclusive    | CSF-USM_142_IGM  | IGHV1-18 | CARDGYCSSTSCYADYYGMDVW      | IGHJ6 | CSF | 12   |
| 57514 | 275 | CSF exclusive    | CSF-USM_142_IGM  | IGHV1-69 | CARDGYDFWSTSYKMAEDYW        | IGHJ4 | CSF | 321  |
| 57514 | 276 | Connecting to PB | CSF-USM_142_IGM  | IGHV1-18 | CARDIPGIVGVTSWFDPW          | IGHJ5 | CSF | 1    |
| 57514 | 276 | Connecting to PB | USM_84463_IGM    | IGHV1-18 | CARDIPGIVGVTSWFDPW          | IGHJ5 | PB  | 69   |
| 57514 | 277 | Connecting to PB | CSF-USM_142_IGM  | IGHV4-59 | CARDREGSGKSYVSFDYW          | IGHJ4 | CSF | 284  |
| 57514 | 277 | Connecting to PB | SM_95720_IGM     | IGHV4-59 | CARDRESRGKSYVSFDYW          | IGHJ4 | PB  | 1    |
| 57514 | 277 | Connecting to PB | USM_84463_IGM    | IGHV4-59 | CARDREGSARSYVSFDYW          | IGHJ4 | PB  | 4    |
| 57514 | 277 | Connecting to PB | SM_95720_IGG     | IGHV4-59 | CARDREGAGKSYVSFDYW          | IGHJ4 | PB  | 14   |
| 57514 | 278 | CSF exclusive    | CSF-USM_142_IGM  | IGHV4-4  | CARDRGNDYGEYYFDDW           | IGHJ4 | CSF | 55   |
| 57514 | 279 | Connecting to PB | CSF-USM_142_IGM  | IGHV3-11 | CARDSRGSNSGYDWDYW           | IGHJ4 | CSF | 99   |
| 57514 | 279 | Connecting to PB | USM_84463_IGM    | IGHV3-11 | CARDSRGSNSGYDWDYW           | IGHJ4 | PB  | 1    |
| 57514 | 279 | Connecting to PB | USM_84463_IGM    | IGHV3-11 | CARDSRRSDSGYDWDYW           | IGHJ4 | PB  | 1    |
| 57514 | 279 | Connecting to PB | USM_84463_IGM    | IGHV3-11 | CARDSQGSNSGYDWDYW           | IGHJ4 | PB  | 2    |
| 57514 | 280 | CSF exclusive    | CSF-USM_142_IGM  | IGHV1-18 | CAREGDCSGDSCYFHYFDYW        | IGHJ4 | CSF | 9    |
| 57514 | 281 | Connecting to PB | CSF-USM_142_IGM  | IGHV4-4  | CAREITDINGWFIDSW            | IGHJ4 | CSF | 268  |
| 57514 | 281 | Connecting to PB | SM_95720_IGG     | IGHV4-4  | CAREITDINGWFIDSW            | IGHJ4 | PB  | 5    |
| 57514 | 282 | CSF exclusive    | CSF-USM_142_IGM  | IGHV4-4  | CARFGYSGYDFNYSYAMDVW        | IGHJ6 | CSF | 228  |
| 57514 | 283 | CSF exclusive    | CSF-USM_142_IGM  | IGHV3-53 | CARGMHSSGWYGGFDHW           | IGHJ1 | CSF | 1    |
| 57514 | 284 | Connecting to PB | CSF-USM_142_IGM  | IGHV4-59 | CARGREGYHGPGSYYW            | IGHJ4 | CSF | 1475 |
| 57514 | 284 | Connecting to PB | Naive_175179_IGM | IGHV4-59 | CARGREGYHGPGSYYW            | IGHJ4 | PB  | 1    |
| 57514 | 285 | Connecting to PB | CSF-USM_142_IGM  | IGHV5-51 | CARGSVAGFMHVDDW             | IGHJ4 | CSF | 597  |
| 57514 | 285 | Connecting to PB | USM_84463_IGM    | IGHV5-51 | CARGSVAGFMHVDDW             | IGHJ4 | PB  | 1    |
| 57514 | 285 | Connecting to PB | DN_18972_IGG     | IGHV5-51 | CAGGSVAGFMHVDDW             | IGHJ4 | PB  | 252  |
| 57514 | 286 | Connecting to PB | CSF-USM_142_IGM  | IGHV1-46 | CARGVDYGGNSVPYGMVW          | IGHJ6 | CSF | 8    |
| 57514 | 286 | Connecting to PB | USM_84463_IGM    | IGHV1-46 | CARGVDYGGNSVPYGMVW          | IGHJ6 | PB  | 1    |
| 57514 | 286 | Connecting to PB | USM_84463_IGM    | IGHV1-46 | CARGVDYGGNSIPYGMVW          | IGHJ6 | PB  | 3    |
| 57514 | 286 | Connecting to PB | USM_84463_IGM    | IGHV1-46 | CARGVDYGGNSVPYGMVW          | IGHJ6 | PB  | 5    |
| 57514 | 286 | Connecting to PB | USM_84463_IGM    | IGHV1-46 | CARGVDYGGNSIPYGLDWW         | IGHJ6 | PB  | 20   |
| 57514 | 287 | Connecting to PB | CSF-USM_142_IGM  | IGHV1-3  | CARISSAQGLLGLDSW            | IGHJ4 | CSF | 689  |
| 57514 | 287 | Connecting to PB | USM_84463_IGM    | IGHV1-3  | CARISSAQGLLGLDSW            | IGHJ4 | PB  | 1    |
| 57514 | 288 | CSF exclusive    | CSF-USM_142_IGM  | IGHV4-39 | CARKAYCAGDRPFDYW            | IGHJ4 | CSF | 59   |
| 57514 | 288 | CSF exclusive    | CSF-USM_142_IGM  | IGHV4-39 | CARKAYCAGDCPFDYW            | IGHJ4 | CSF | 174  |
| 57514 | 289 | CSF exclusive    | CSF-USM_142_IGM  | IGHV4-59 | CARMVNSGYDYGWYYGMDVW        | IGHJ6 | CSF | 18   |
| 57514 | 290 | CSF exclusive    | CSF-USM_142_IGM  | IGHV4-59 | CARMVNSGYDYGWYYGMDVW        | IGHJ6 | CSF | 426  |
| 57514 | 291 | Connecting to PB | CSF-USM_142_IGM  | IGHV4-39 | CARPLYDGRGYFFYW             | IGHJ4 | CSF | 101  |
| 57514 | 291 | Connecting to PB | USM_84463_IGM    | IGHV4-39 | CARPLYDGRGYFFYW             | IGHJ4 | PB  | 5    |
| 57514 | 291 | Connecting to PB | USM_84463_IGM    | IGHV4-39 | CARLPDGRGYFFYW              | IGHJ4 | PB  | 6    |
| 57514 | 292 | CSF exclusive    | CSF-USM_142_IGM  | IGHV1-2  | CARSCNYNTCNNFYFFGMDVW       | IGHJ6 | CSF | 51   |
| 57514 | 293 | CSF exclusive    | CSF-USM_142_IGM  | IGHV3-7  | CARTRSGWLTFFNIW             | IGHJ3 | CSF | 1    |
| 57514 | 293 | CSF exclusive    | CSF-USM_142_IGM  | IGHV3-7  | CARTRSGWLTFFDIW             | IGHJ3 | CSF | 14   |
| 57514 | 294 | CSF exclusive    | CSF-USM_142_IGM  | IGHV4-4  | CARVEDDYSNPSW               | IGHJ5 | CSF | 1    |
| 57514 | 295 | CSF exclusive    | CSF-USM_142_IGM  | IGHV4-59 | CARVGQMTAIRANDYYHSMVW       | IGHJ6 | CSF | 76   |
| 57514 | 296 | CSF exclusive    | CSF-USM_142_IGM  | IGHV3-7  | CARVGQQLVPDWFDPW            | IGHJ5 | CSF | 32   |
| 57514 | 297 | CSF exclusive    | CSF-USM_142_IGM  | IGHV4-31 | CARVMTTVTYEAWFDPW           | IGHJ5 | CSF | 580  |
| 57514 | 298 | CSF exclusive    | CSF-USM_142_IGM  | IGHV3-74 | CARVNWNWFPDPW               | IGHJ5 | CSF | 14   |
| 57514 | 299 | Connecting to PB | CSF-USM_142_IGM  | IGHV6-1  | CARVSHHSKPLW                | IGHJ1 | CSF | 474  |
| 57514 | 299 | Connecting to PB | SM_95720_IGM     | IGHV6-1  | CARVSHHSKPLW                | IGHJ1 | PB  | 1    |
| 57514 | 299 | Connecting to PB | USM_84463_IGM    | IGHV6-1  | SARVSHNSRPLW                | IGHJ1 | PB  | 1    |
| 57514 | 299 | Connecting to PB | USM_84463_IGM    | IGHV6-1  | CARVSHNSRPLW                | IGHJ1 | PB  | 27   |
| 57514 | 300 | CSF exclusive    | CSF-USM_142_IGM  | IGHV1-3  | CARVSYDTSGYGAGSRPTEYYHGMDVW | IGHJ6 | CSF | 86   |
| 57514 | 301 | Connecting to PB | CSF-USM_142_IGM  | IGHV1-2  | CASSGRGYSYGYDVDYFDYW        | IGHJ4 | CSF | 587  |
| 57514 | 301 | Connecting to PB | USM_84463_IGM    | IGHV1-2  | CASSGRGYSYGYDVDYFDYW        | IGHJ4 | PB  | 23   |
| 57514 | 302 | CSF exclusive    | CSF-USM_142_IGM  | IGHV3-9  | CGKGYCSGICYLSDYW            | IGHJ4 | CSF | 231  |
| 57514 | 303 | Connecting to PB | CSF-USM_142_IGM  | IGHV3-15 | CKHEHNINYGMDVW              | IGHJ6 | CSF | 17   |
| 57514 | 303 | Connecting to PB | USM_84463_IGM    | IGHV3-15 | CKHEHSENYGMDVW              | IGHJ6 | PB  | 5    |
| 57514 | 303 | Connecting to PB | SM_95720_IGM     | IGHV3-15 | CKHEHNINYGMDVW              | IGHJ6 | PB  | 7    |
| 57514 | 304 | Connecting to PB | CSF-USM_142_IGM  | IGHV3-7  | CSRSLNYW                    | IGHJ4 | CSF | 155  |
| 57514 | 304 | Connecting to PB | USM_84463_IGM    | IGHV3-7  | CVRDIDYW                    | IGHJ4 | PB  | 1    |
| 57514 | 304 | Connecting to PB | USM_84463_IGM    | IGHV3-7  | CARSIDYW                    | IGHJ4 | PB  | 2    |
| 57514 | 304 | Connecting to PB | USM_84463_IGM    | IGHV3-7  | CSWSLNYW                    | IGHJ4 | PB  | 2    |
| 57514 | 304 | Connecting to PB | USM_84463_IGM    | IGHV3-7  | CVRDLIDYW                   | IGHJ4 | PB  | 2    |
| 57514 | 304 | Connecting to PB | SM_95720_IGG     | IGHV3-7  | CSRSLDYW                    | IGHJ4 | PB  | 3    |
| 57514 | 304 | Connecting to PB | SM_95720_IGG     | IGHV3-7  | CVRDIDYW                    | IGHJ4 | PB  | 3    |
| 57514 | 304 | Connecting to PB | USM_84463_IGM    | IGHV3-7  | CSRRLNYW                    | IGHJ4 | PB  | 4    |
| 57514 | 304 | Connecting to PB | SM_95720_IGG     | IGHV3-7  | CSWSLNYW                    | IGHJ4 | PB  | 4    |

|       |     |                  |                   |            |                              |       |     |       |
|-------|-----|------------------|-------------------|------------|------------------------------|-------|-----|-------|
| 57514 | 304 | Connecting to PB | USM_84463_IGM     | IGHV3-7    | CTRSLDDW                     | IGHJ4 | PB  | 4     |
| 57514 | 304 | Connecting to PB | SM_95720_IGG      | IGHV3-7    | CSRSLNYW                     | IGHJ4 | PB  | 5     |
| 57514 | 304 | Connecting to PB | USM_84463_IGM     | IGHV3-7    | CTRSLDYW                     | IGHJ4 | PB  | 5     |
| 57514 | 304 | Connecting to PB | USM_84463_IGM     | IGHV3-7    | CSRSLNYW                     | IGHJ4 | PB  | 21    |
| 57514 | 305 | Connecting to PB | CSF-USM_142_IGM   | IGHV4-34   | CTRDIYGVAGLW                 | IGHJ5 | CSF | 1185  |
| 57514 | 305 | Connecting to PB | USM_84463_IGM     | IGHV4-34   | CTRDVYGVAGLW                 | IGHJ5 | PB  | 1     |
| 57514 | 305 | Connecting to PB | USM_84463_IGM     | IGHV4-34   | CTRDIYGVAGLW                 | IGHJ5 | PB  | 26    |
| 57514 | 306 | CSF exclusive    | CSF-USM_142_IGM   | IGHV3-73   | CTRYAGDNAFDIW                | IGHJ3 | CSF | 174   |
| 57514 | 307 | CSF exclusive    | CSF-USM_142_IGM   | IGHV3-15   | CTTVLNYGGNPSGYDFW            | IGHJ4 | CSF | 72    |
| 57514 | 308 | CSF exclusive    | CSF-USM_142_IGM   | IGHV3-7    | CVCDYAGGSKFDYW               | IGHJ4 | CSF | 30    |
| 57514 | 309 | CSF exclusive    | CSF-USM_142_IGM   | IGHV3-30   | CVKPGYSSGWYDFW               | IGHJ5 | CSF | 183   |
| 57514 | 310 | CSF exclusive    | CSF-USM_142_IGM   | IGHV3-48   | CVRGDESGWDFDYW               | IGHJ4 | CSF | 196   |
| 57514 | 311 | CSF exclusive    | CSF-USM_142_IGM   | IGHV4-59   | CVRKRRCDFDYW                 | IGHJ4 | CSF | 4     |
| 57514 | 312 | Connecting to PB | CSF-USM_142_IGM   | IGHV3-11   | CVSSQGYCTTTTCYNNWFDIW        | IGHJ5 | CSF | 117   |
| 57514 | 312 | Connecting to PB | USM_84463_IGM     | IGHV3-11   | CVSSQGYCTTATCYNNWFDIL        | IGHJ5 | PB  | 6     |
| 57514 | 313 | CSF exclusive    | CSF-USM_142_IGM   | IGHV3-33-2 | DVDYFDYW                     | IGHJ4 | CSF | 2     |
| 57714 | 1   | CSF exclusive    | CSF-DN_177_IGG    | IGHV3-21   | CAGDRLYNSGWKDYGMVW           | IGHJ6 | CSF | 1     |
| 57714 | 1   | CSF exclusive    | CSF-DN_177_IGG    | IGHV3-21   | CARDRLYNSWWDYGMVW            | IGHJ6 | CSF | 68    |
| 57714 | 2   | CSF exclusive    | CSF-DN_177_IGG    | IGHV4-39   | CAGQAGGNSGACFDWC             | IGHJ4 | CSF | 3     |
| 57714 | 2   | CSF exclusive    | CSF-DN_177_IGG    | IGHV4-39   | CAGQAGGNSGAYFDYW             | IGHJ4 | CSF | 848   |
| 57714 | 3   | CSF exclusive    | CSF-DN_177_IGG    | IGHV4-55   | CAGSLKRSRYPKQDYGMVW          | IGHJ6 | CSF | 336   |
| 57714 | 4   | CSF exclusive    | CSF-DN_177_IGG    | IGHV2-5    | CAHSEYDFWSGYTGPWFDPW         | IGHJ5 | CSF | 2702  |
| 57714 | 5   | CSF exclusive    | CSF-DN_177_IGG    | IGHV2-5    | CAHSQGYDFWNGYSTFYFDPW        | IGHJ5 | CSF | 983   |
| 57714 | 6   | Connecting to PB | CSF-DN_177_IGG    | IGHV2-5    | CAHSTYHSDSSGSQFYSPVYW        | IGHJ4 | CSF | 10    |
| 57714 | 6   | Connecting to PB | CSF-DN_177_IGG    | IGHV2-5    | CAHSTYHSDSSGSQFYSPVYW        | IGHJ4 | CSF | 1413  |
| 57714 | 6   | Connecting to PB | DN_87942_IGG      | IGHV2-5    | CAHSTYHSDSSGSQFYSPVYW        | IGHJ4 | PB  | 16    |
| 57714 | 7   | Connecting to PB | CSF-DN_177_IGG    | IGHV3-23   | CAKANVVVPAVNDVFDIW           | IGHJ3 | CSF | 34    |
| 57714 | 7   | Connecting to PB | CSF-DN_177_IGG    | IGHV3-23   | CAKVVVVVPAVNDVFDIW           | IGHJ3 | CSF | 308   |
| 57714 | 7   | Connecting to PB | DN_87942_IGG      | IGHV3-23   | CAKVVVVVPAVNDVFDIW           | IGHJ3 | PB  | 1298  |
| 57714 | 8   | CSF exclusive    | CSF-DN_177_IGG    | IGHV3-9    | CAKDLNWNVKAFCDC              | IGHJ4 | CSF | 49    |
| 57714 | 9   | CSF exclusive    | CSF-DN_177_IGG    | IGHV3-9    | CAKDMGLDGCYSGCGIDVW          | IGHJ6 | CSF | 306   |
| 57714 | 10  | CSF exclusive    | CSF-DN_177_IGG    | IGHV4-39   | CANSVDTTIVTMAFNIW            | IGHJ3 | CSF | 68    |
| 57714 | 11  | CSF exclusive    | CSF-DN_177_IGG    | IGHV1-69   | CARAAADTSSIAAPQTTSDAFDIW     | IGHJ3 | CSF | 730   |
| 57714 | 12  | CSF exclusive    | CSF-DN_177_IGG    | IGHV1-69   | CARAKSLFGDYSDTFGIW           | IGHJ3 | CSF | 37    |
| 57714 | 13  | CSF exclusive    | CSF-DN_177_IGG    | IGHV4-31   | CARASSAGSCFSNW               | IGHJ4 | CSF | 147   |
| 57714 | 14  | CSF exclusive    | CSF-DN_177_IGG    | IGHV4-55   | CARDLRRITIFGVVSRWPPYGMVW     | IGHJ6 | CSF | 1     |
| 57714 | 15  | CSF exclusive    | CSF-DN_177_IGG    | IGHV1-46   | CARDSLANYDSRGRVFDIW          | IGHJ3 | CSF | 53    |
| 57714 | 16  | Connecting to PB | CSF-DN_177_IGG    | IGHV4-59   | CARESASLDYW                  | IGHJ4 | CSF | 1     |
| 57714 | 16  | Connecting to PB | SM_178484_IGM     | IGHV4-59   | CARESASFDYW                  | IGHJ4 | PB  | 504   |
| 57714 | 17  | CSF exclusive    | CSF-DN_177_IGG    | IGHV4-39   | CARGARYSDLLRPDIGAYFDYW       | IGHJ4 | CSF | 83    |
| 57714 | 18  | CSF exclusive    | CSF-DN_177_IGG    | IGHV4-34   | CARGPDFWSGELDYW              | IGHJ4 | CSF | 135   |
| 57714 | 19  | CSF exclusive    | CSF-DN_177_IGG    | IGHV4-39   | CARGSGGYVGVWFDPW             | IGHJ5 | CSF | 19    |
| 57714 | 19  | CSF exclusive    | CSF-DN_177_IGG    | IGHV4-39   | CARGSGSYVGVWFDPW             | IGHJ5 | CSF | 92    |
| 57714 | 20  | CSF exclusive    | CSF-DN_177_IGG    | IGHV2-26   | CARIVGLYYGSGTSGMDVW          | IGHJ6 | CSF | 384   |
| 57714 | 21  | CSF exclusive    | CSF-DN_177_IGG    | IGHV2-70   | CARMELERQLNAFDIW             | IGHJ3 | CSF | 964   |
| 57714 | 22  | Connecting to PB | CSF-DN_177_IGG    | IGHV3-7    | CARNDRIGWYNDYW               | IGHJ4 | CSF | 26021 |
| 57714 | 22  | Connecting to PB | SM_178484_IGG     | IGHV3-7    | CARNDRIGWYNDYW               | IGHJ4 | PB  | 11    |
| 57714 | 23  | CSF exclusive    | CSF-DN_177_IGG    | IGHV5-51   | CARLRYTSSGWYAFDYW            | IGHJ4 | CSF | 312   |
| 57714 | 24  | CSF exclusive    | CSF-DN_177_IGG    | IGHV4-59   | CARRTVDTSKVVFFHHYFMDVW       | IGHJ6 | CSF | 10    |
| 57714 | 25  | CSF exclusive    | CSF-DN_177_IGG    | IGHV3-21   | CARSQNNYYDGGDYSGWYFDLW       | IGHJ2 | CSF | 261   |
| 57714 | 26  | CSF exclusive    | CSF-DN_177_IGG    | IGHV4-59   | CARTSFWFAEYHGTFDIW           | IGHJ3 | CSF | 80    |
| 57714 | 27  | CSF exclusive    | CSF-DN_177_IGG    | IGHV4-34   | CARVAARTVWVWGLMHLRPLVRYRLDLW | IGHJ2 | CSF | 1     |
| 57714 | 28  | CSF exclusive    | CSF-DN_177_IGG    | IGHV3-7    | CARVSSLTRRALFDYW             | IGHJ4 | CSF | 191   |
| 57714 | 29  | CSF exclusive    | CSF-DN_177_IGG    | IGHV3-30   | CASDLGAARPRNFDYW             | IGHJ4 | CSF | 94    |
| 57714 | 30  | CSF exclusive    | CSF-DN_177_IGG    | IGHV4-39   | CATFWASYGIDVW                | IGHJ6 | CSF | 815   |
| 57714 | 31  | CSF exclusive    | CSF-DN_177_IGG    | IGHV3-21   | CGREYYASGSCDYW               | IGHJ4 | CSF | 93    |
| 57714 | 32  | CSF exclusive    | CSF-DN_177_IGG    | IGHV3-13   | CRVRNDRIGWYNDYW              | IGHJ4 | CSF | 238   |
| 57714 | 33  | CSF exclusive    | CSF-DN_177_IGG    | IGHV3-73   | CTSRGHYYDSSNYFVLDYW          | IGHJ4 | CSF | 241   |
| 57714 | 34  | CSF exclusive    | CSF-DN_177_IGG    | IGHV2-5    | SDSSGSQFYSPVYW               | IGHJ4 | CSF | 41    |
| 57714 | 35  | CSF exclusive    | CSF-Naive_618_IGM | IGHV1-69   | CAGHRFYMVRGVIFGFDPW          | IGHJ5 | CSF | 253   |
| 57714 | 36  | CSF exclusive    | CSF-Naive_618_IGM | IGHV2-5    | CAHGITYDSDAMDVW              | IGHJ6 | CSF | 352   |
| 57714 | 37  | CSF exclusive    | CSF-Naive_618_IGM | IGHV2-5    | CAHRGVYDILTGHNNWFDPW         | IGHJ5 | CSF | 563   |
| 57714 | 38  | Connecting to PB | CSF-Naive_618_IGM | IGHV2-5    | CAHRRDVCSSTRCYSVFDPW         | IGHJ5 | CSF | 204   |
| 57714 | 38  | Connecting to PB | SM_178484_IGG     | IGHV2-5    | CAHRRDVCSSTRCYSVFDPW         | IGHJ5 | PB  | 2     |
| 57714 | 39  | CSF exclusive    | CSF-Naive_618_IGM | IGHV4-39   | CAISRGYYLNFDPW               | IGHJ4 | CSF | 6     |
| 57714 | 40  | CSF exclusive    | CSF-Naive_618_IGM | IGHV3-30   | CAKAATLISNWFDPW              | IGHJ5 | CSF | 10    |
| 57714 | 41  | CSF exclusive    | CSF-Naive_618_IGM | IGHV3-23   | CAKATYGGWVDYW                | IGHJ4 | CSF | 133   |
| 57714 | 42  | CSF exclusive    | CSF-Naive_618_IGM | IGHV3-23   | CAKDERLHDYR                  | IGHJ4 | CSF | 2     |
| 57714 | 42  | CSF exclusive    | CSF-Naive_618_IGM | IGHV3-23   | CAKDERLHDYW                  | IGHJ4 | CSF | 49    |
| 57714 | 43  | CSF exclusive    | CSF-Naive_618_IGM | IGHV3-9    | CAKDKDSSGLIRAFDIW            | IGHJ3 | CSF | 60    |
| 57714 | 44  | CSF exclusive    | CSF-Naive_618_IGM | IGHV3-43   | CAKDLVGGDGDYW                | IGHJ4 | CSF | 55    |
| 57714 | 45  | CSF exclusive    | CSF-Naive_618_IGM | IGHV3-43   | CAKDMRSGSYGAFDIW             | IGHJ3 | CSF | 117   |
| 57714 | 46  | CSF exclusive    | CSF-Naive_618_IGM | IGHV3-30   | CAKDRQQQLVNYYGMDVW           | IGHJ6 | CSF | 26    |
| 57714 | 47  | CSF exclusive    | CSF-Naive_618_IGM | IGHV3-23   | CAKDRASGLRGVYGMVW            | IGHJ6 | CSF | 79    |
| 57714 | 48  | CSF exclusive    | CSF-Naive_618_IGM | IGHV3-43   | CAGKGLQDYGMVW                | IGHJ6 | CSF | 1     |
| 57714 | 48  | CSF exclusive    | CSF-Naive_618_IGM | IGHV3-43   | CAKEGLQDYGMVW                | IGHJ6 | CSF | 16    |
| 57714 | 49  | CSF exclusive    | CSF-Naive_618_IGM | IGHV3-9    | CAKEQGYSGSYFGLGDAFDIW        | IGHJ3 | CSF | 23    |
| 57714 | 50  | CSF exclusive    | CSF-Naive_618_IGM | IGHV3-30   | CAKESGYSDPQYHYGMVW           | IGHJ6 | CSF | 14    |
| 57714 | 51  | CSF exclusive    | CSF-Naive_618_IGM | IGHV3-30   | CAKEWALYDRRFDPW              | IGHJ5 | CSF | 59    |
| 57714 | 52  | CSF exclusive    | CSF-Naive_618_IGM | IGHV3-23   | CAKGLSVDYDSSGYDDAFDIW        | IGHJ3 | CSF | 78    |
| 57714 | 53  | CSF exclusive    | CSF-Naive_618_IGM | IGHV3-23   | CAKGNYSYSSWYFDPW             | IGHJ5 | CSF | 38    |
| 57714 | 54  | CSF exclusive    | CSF-Naive_618_IGM | IGHV3-9    | CAKGRLSPTDALEMW              | IGHJ3 | CSF | 24    |
| 57714 | 55  | CSF exclusive    | CSF-Naive_618_IGM | IGHV1-69   | CAKLRDRGYNEYWYFDLW           | IGHJ2 | CSF | 386   |
| 57714 | 56  | CSF exclusive    | CSF-USM_999_IGM   | IGHV4-34   | CARNEYFDYW                   | IGHJ4 | CSF | 66    |
| 57714 | 56  | CSF exclusive    | CSF-Naive_618_IGM | IGHV4-34   | CAKNEFFDYW                   | IGHJ4 | CSF | 395   |

|       |     |                  |                   |          |                              |       |     |     |
|-------|-----|------------------|-------------------|----------|------------------------------|-------|-----|-----|
| 57714 | 57  | CSF exclusive    | CSF-Naive_618_IGM | IGHV3-23 | CAKSPYYDSSGGYYDYW            | IGHJ4 | CSF | 18  |
| 57714 | 58  | CSF exclusive    | CSF-Naive_618_IGM | IGHV3-23 | CAKTPYANYDSSSSFDYW           | IGHJ4 | CSF | 33  |
| 57714 | 59  | CSF exclusive    | CSF-Naive_618_IGM | IGHV4-59 | CARARRGYSYGYIDYW             | IGHJ4 | CSF | 12  |
| 57714 | 60  | CSF exclusive    | CSF-Naive_618_IGM | IGHV1-69 | CARAYSSGWDHDIW               | IGHJ4 | CSF | 173 |
| 57714 | 61  | CSF exclusive    | CSF-Naive_618_IGM | IGHV1-8  | CARAYYRGAFDIW                | IGHJ3 | CSF | 82  |
| 57714 | 62  | CSF exclusive    | CSF-Naive_618_IGM | IGHV1-18 | CARDAKYCSSTSCYRWFDPW         | IGHJ5 | CSF | 123 |
| 57714 | 63  | CSF exclusive    | CSF-Naive_618_IGM | IGHV3-7  | CARDARLSSGWYRGQDNWFDPW       | IGHJ5 | CSF | 21  |
| 57714 | 64  | Connecting to PB | CSF-Naive_618_IGM | IGHV3-74 | CARDLDDYW                    | IGHJ4 | CSF | 9   |
| 57714 | 64  | Connecting to PB | Naive_200000_IGM  | IGHV3-74 | CARDLVDYW                    | IGHJ4 | PB  | 3   |
| 57714 | 65  | CSF exclusive    | CSF-Naive_618_IGM | IGHV3-21 | CARDERIAVAAWFDPW             | IGHJ5 | CSF | 36  |
| 57714 | 66  | CSF exclusive    | CSF-Naive_618_IGM | IGHV4-59 | CARDPRAGGMDVW                | IGHJ6 | CSF | 82  |
| 57714 | 67  | CSF exclusive    | CSF-Naive_618_IGM | IGHV1-69 | CARDGGEWELLQAFDIW            | IGHJ3 | CSF | 328 |
| 57714 | 68  | CSF exclusive    | CSF-Naive_618_IGM | IGHV3-21 | CARDGGTRTARALNW              | IGHJ4 | CSF | 54  |
| 57714 | 69  | CSF exclusive    | CSF-Naive_618_IGM | IGHV4-59 | CARDGPWAIDYW                 | IGHJ4 | CSF | 1   |
| 57714 | 70  | CSF exclusive    | CSF-Naive_618_IGM | IGHV3-53 | CARDGPYGDFLHRYFDLW           | IGHJ2 | CSF | 6   |
| 57714 | 71  | CSF exclusive    | CSF-USM_999_IGM   | IGHV1-18 | CARDGTVTRDIW                 | IGHJ4 | CSF | 1   |
| 57714 | 71  | CSF exclusive    | CSF-Naive_618_IGM | IGHV1-18 | CTRDGTVTRDIW                 | IGHJ4 | CSF | 25  |
| 57714 | 71  | CSF exclusive    | CSF-Naive_618_IGM | IGHV1-18 | CARDGTVTRDIW                 | IGHJ4 | CSF | 693 |
| 57714 | 72  | CSF exclusive    | CSF-Naive_618_IGM | IGHV4-4  | CARDGVDVVVITRGAFDIW          | IGHJ3 | CSF | 252 |
| 57714 | 73  | CSF exclusive    | CSF-Naive_618_IGM | IGHV4-39 | CARDHYSGSYFDYW               | IGHJ4 | CSF | 59  |
| 57714 | 74  | CSF exclusive    | CSF-Naive_618_IGM | IGHV3-21 | CARDIGDGYSAHW                | IGHJ4 | CSF | 40  |
| 57714 | 75  | CSF exclusive    | CSF-Naive_618_IGM | IGHV4-31 | CARDIGGYSYGPDIW              | IGHJ4 | CSF | 5   |
| 57714 | 76  | CSF exclusive    | CSF-Naive_618_IGM | IGHV1-18 | CARDITGTYFFDYW               | IGHJ4 | CSF | 188 |
| 57714 | 77  | CSF exclusive    | CSF-Naive_618_IGM | IGHV1-2  | CARDKRGSSDYGDYGMVDVW         | IGHJ6 | CSF | 150 |
| 57714 | 78  | CSF exclusive    | CSF-Naive_618_IGM | IGHV3-13 | CARDLSSGWHYGMVDVW            | IGHJ6 | CSF | 51  |
| 57714 | 79  | Connecting to PB | CSF-Naive_618_IGM | IGHV1-46 | CARDLGSDFLDYW                | IGHJ4 | CSF | 6   |
| 57714 | 79  | Connecting to PB | DN_87942_IGG      | IGHV1-46 | CARDLGSYFDYW                 | IGHJ4 | PB  | 1   |
| 57714 | 80  | CSF exclusive    | CSF-Naive_618_IGM | IGHV3-53 | CARDLGTNAFDIW                | IGHJ3 | CSF | 100 |
| 57714 | 81  | CSF exclusive    | CSF-Naive_618_IGM | IGHV3-11 | CARDLISWYFFDYW               | IGHJ4 | CSF | 48  |
| 57714 | 82  | CSF exclusive    | CSF-Naive_618_IGM | IGHV1-2  | CARDLRLPAGTRYYYYGMVDVW       | IGHJ6 | CSF | 12  |
| 57714 | 83  | CSF exclusive    | CSF-Naive_618_IGM | IGHV1-18 | CARDNAQLVPPYFDYW             | IGHJ4 | CSF | 75  |
| 57714 | 84  | CSF exclusive    | CSF-Naive_618_IGM | IGHV1-2  | CARDPVGSSGGYDW               | IGHJ4 | CSF | 148 |
| 57714 | 85  | CSF exclusive    | CSF-Naive_618_IGM | IGHV3-7  | CARDPRLRWYFDLW               | IGHJ2 | CSF | 118 |
| 57714 | 86  | CSF exclusive    | CSF-Naive_618_IGM | IGHV3-21 | CARDPTLSMIDAFDIW             | IGHJ3 | CSF | 49  |
| 57714 | 87  | CSF exclusive    | CSF-Naive_618_IGM | IGHV3-21 | CARDQCRDGSCTRPLDRW           | IGHJ4 | CSF | 32  |
| 57714 | 88  | CSF exclusive    | CSF-Naive_618_IGM | IGHV1-18 | CARDQGHYGI PSDYW             | IGHJ4 | CSF | 137 |
| 57714 | 89  | CSF exclusive    | CSF-Naive_618_IGM | IGHV1-69 | CARDREAAPLHYFYGMVDVW         | IGHJ6 | CSF | 165 |
| 57714 | 90  | CSF exclusive    | CSF-Naive_618_IGM | IGHV3-21 | CARDRGGYDILTASYTSEAFDVW      | IGHJ3 | CSF | 84  |
| 57714 | 91  | Connecting to PB | CSF-Naive_618_IGM | IGHV4-39 | CARDRPGVAAHYDW               | IGHJ5 | CSF | 1   |
| 57714 | 91  | Connecting to PB | PC_16850_IGM      | IGHV4-39 | CARDRPGAAAHYDW               | IGHJ5 | PB  | 1   |
| 57714 | 91  | Connecting to PB | PC_16850_IGG      | IGHV4-39 | CARDRPGVAARYDW               | IGHJ5 | PB  | 1   |
| 57714 | 91  | Connecting to PB | PC_16850_IGM      | IGHV4-39 | CARDRPGVAAHYDW               | IGHJ5 | PB  | 435 |
| 57714 | 92  | CSF exclusive    | CSF-Naive_618_IGM | IGHV4-39 | CARDRVVPTRGYCGMDVW           | IGHJ6 | CSF | 19  |
| 57714 | 93  | CSF exclusive    | CSF-Naive_618_IGM | IGHV1-69 | CARDSGDSMDYDSSGGYYDYW        | IGHJ4 | CSF | 176 |
| 57714 | 94  | CSF exclusive    | CSF-Naive_618_IGM | IGHV1-3  | CARDSSGGRPWEHPRAFDSW         | IGHJ4 | CSF | 129 |
| 57714 | 95  | CSF exclusive    | CSF-Naive_618_IGM | IGHV3-23 | CARDVSGHYVMDVW               | IGHJ6 | CSF | 66  |
| 57714 | 96  | CSF exclusive    | CSF-Naive_618_IGM | IGHV1-69 | CARDVVVAGAFDIW               | IGHJ4 | CSF | 96  |
| 57714 | 97  | Connecting to PB | CSF-Naive_618_IGM | IGHV3-48 | CARDWGEYSSSSIGYW             | IGHJ4 | CSF | 154 |
| 57714 | 97  | Connecting to PB | Naive_200000_IGM  | IGHV3-48 | CARDWGEYSSSSIGYW             | IGHJ4 | PB  | 2   |
| 57714 | 97  | Connecting to PB | USM_200000_IGM    | IGHV3-48 | CARDWGEYSSSSIGYW             | IGHJ4 | PB  | 6   |
| 57714 | 98  | CSF exclusive    | CSF-Naive_618_IGM | IGHV1-3  | CAREDSSPRKDAFDIW             | IGHJ3 | CSF | 440 |
| 57714 | 99  | CSF exclusive    | CSF-Naive_618_IGM | IGHV3-48 | CAREEGYYDSSGYPTDYW           | IGHJ4 | CSF | 22  |
| 57714 | 99  | CSF exclusive    | CSF-Naive_618_IGM | IGHV3-48 | CAREEGYYDSSGYLTDYW           | IGHJ4 | CSF | 46  |
| 57714 | 100 | CSF exclusive    | CSF-Naive_618_IGM | IGHV3-74 | CAREKYNWQYFDYW               | IGHJ4 | CSF | 16  |
| 57714 | 101 | CSF exclusive    | CSF-Naive_618_IGM | IGHV1-3  | CAREPAGRRPRTYYDSSGGYYGSYFDYW | IGHJ4 | CSF | 64  |
| 57714 | 102 | CSF exclusive    | CSF-Naive_618_IGM | IGHV1-2  | CARERIDSYSYGMVDVW            | IGHJ6 | CSF | 1   |
| 57714 | 103 | CSF exclusive    | CSF-Naive_618_IGM | IGHV1-2  | CARERIDSYSYGMVDVW            | IGHJ6 | CSF | 117 |
| 57714 | 104 | CSF exclusive    | CSF-Naive_618_IGM | IGHV1-18 | CARESYGDRYRWSFDYW            | IGHJ4 | CSF | 310 |
| 57714 | 105 | CSF exclusive    | CSF-Naive_618_IGM | IGHV1-69 | CARETGDSGGSYYPDAFDYW         | IGHJ4 | CSF | 555 |
| 57714 | 106 | CSF exclusive    | CSF-Naive_618_IGM | IGHV1-18 | CAREVWAFDIW                  | IGHJ3 | CSF | 265 |
| 57714 | 107 | CSF exclusive    | CSF-Naive_618_IGM | IGHV4-39 | CARFEQLVLVDYW                | IGHJ4 | CSF | 211 |
| 57714 | 108 | CSF exclusive    | CSF-Naive_618_IGM | IGHV3-53 | CARGAGYGDYGYYYGMVDVW         | IGHJ6 | CSF | 67  |
| 57714 | 109 | Connecting to PB | CSF-Naive_618_IGM | IGHV4-39 | CARGDAYDIW                   | IGHJ3 | CSF | 316 |
| 57714 | 109 | Connecting to PB | Naive_200000_IGM  | IGHV4-39 | CARNDAFDIW                   | IGHJ3 | PB  | 1   |
| 57714 | 109 | Connecting to PB | Naive_200000_IGM  | IGHV4-39 | CARLNAFDIW                   | IGHJ3 | PB  | 3   |
| 57714 | 109 | Connecting to PB | USM_200000_IGM    | IGHV4-39 | CARSNAFDIW                   | IGHJ3 | PB  | 3   |
| 57714 | 109 | Connecting to PB | DN_87942_IGG      | IGHV4-39 | CARHVAFDIW                   | IGHJ3 | PB  | 12  |
| 57714 | 110 | CSF exclusive    | CSF-Naive_618_IGM | IGHV3-21 | CARGERDAFDIW                 | IGHJ3 | CSF | 59  |
| 57714 | 111 | CSF exclusive    | CSF-Naive_618_IGM | IGHV3-21 | CARGGCTNGVCVAFDPW            | IGHJ5 | CSF | 35  |
| 57714 | 112 | CSF exclusive    | CSF-Naive_618_IGM | IGHV1-69 | CARGGLVGAGVPFADIW            | IGHJ3 | CSF | 257 |
| 57714 | 113 | CSF exclusive    | CSF-Naive_618_IGM | IGHV4-28 | CARGGQLWLPVPSFGYW            | IGHJ4 | CSF | 200 |
| 57714 | 114 | CSF exclusive    | CSF-Naive_618_IGM | IGHV6-1  | CARGGSYSSGSWFDPW             | IGHJ5 | CSF | 126 |
| 57714 | 115 | CSF exclusive    | CSF-Naive_618_IGM | IGHV1-69 | CARGGTAMRAFDIW               | IGHJ3 | CSF | 73  |
| 57714 | 116 | CSF exclusive    | CSF-Naive_618_IGM | IGHV1-8  | CARGGYGDYWFDPW               | IGHJ5 | CSF | 67  |
| 57714 | 117 | CSF exclusive    | CSF-Naive_618_IGM | IGHV1-8  | CARGHDREYDFWSGYPPYYGMVDVW    | IGHJ6 | CSF | 219 |
| 57714 | 118 | CSF exclusive    | CSF-Naive_618_IGM | IGHV1-69 | CARGIYYDSSGGYPPYYVDCW        | IGHJ4 | CSF | 3   |
| 57714 | 118 | CSF exclusive    | CSF-Naive_618_IGM | IGHV1-69 | CARGIYYDSSGGYPPYYFDYW        | IGHJ4 | CSF | 319 |
| 57714 | 119 | CSF exclusive    | CSF-Naive_618_IGM | IGHV1-8  | CARGLPQDYSGSMLSYSW           | IGHJ4 | CSF | 421 |
| 57714 | 120 | CSF exclusive    | CSF-Naive_618_IGM | IGHV4-39 | CARGPRGWGMQNTFDIW            | IGHJ3 | CSF | 1   |
| 57714 | 121 | Connecting to PB | CSF-Naive_618_IGM | IGHV1-8  | CARGQDYGYGMVDVW              | IGHJ6 | CSF | 5   |
| 57714 | 121 | Connecting to PB | Naive_200000_IGM  | IGHV1-8  | CARGRSYYGMVDVW               | IGHJ6 | PB  | 1   |
| 57714 | 122 | CSF exclusive    | CSF-Naive_618_IGM | IGHV4-34 | CARGQLLGYCSGSGRRCRRDWFDPW    | IGHJ5 | CSF | 264 |
| 57714 | 123 | CSF exclusive    | CSF-Naive_618_IGM | IGHV4-59 | CARGRLGTAPPDYW               | IGHJ4 | CSF | 90  |
| 57714 | 124 | CSF exclusive    | CSF-Naive_618_IGM | IGHV3-48 | CARGRRWLETDDYW               | IGHJ4 | CSF | 1   |
| 57714 | 124 | CSF exclusive    | CSF-Naive_618_IGM | IGHV3-48 | CARGRQWLETDDYW               | IGHJ4 | CSF | 167 |

|       |     |                  |                   |          |                           |       |     |      |
|-------|-----|------------------|-------------------|----------|---------------------------|-------|-----|------|
| 57714 | 125 | CSF exclusive    | CSF-Naive_618_IGM | IGHV3-11 | CARGVGATGYW               | IGHJ4 | CSF | 50   |
| 57714 | 126 | CSF exclusive    | CSF-Naive_618_IGM | IGHV4-39 | CARGVGKSSSNFDYW           | IGHJ4 | CSF | 278  |
| 57714 | 127 | CSF exclusive    | CSF-Naive_618_IGM | IGHV1-3  | CARGYSGPDFYFDYW           | IGHJ4 | CSF | 80   |
| 57714 | 128 | CSF exclusive    | CSF-Naive_618_IGM | IGHV4-39 | CARHHAGYSSAWTGTDYW        | IGHJ4 | CSF | 163  |
| 57714 | 129 | CSF exclusive    | CSF-Naive_618_IGM | IGHV4-39 | CARHTVADYDRRGMDVW         | IGHJ6 | CSF | 46   |
| 57714 | 130 | CSF exclusive    | CSF-Naive_618_IGM | IGHV2-26 | CARIGDHADYW               | IGHJ4 | CSF | 249  |
| 57714 | 131 | CSF exclusive    | CSF-Naive_618_IGM | IGHV4-59 | CARLALSGSYYPYFDYW         | IGHJ4 | CSF | 31   |
| 57714 | 132 | CSF exclusive    | CSF-Naive_618_IGM | IGHV4-39 | CARLGTGGVPTPNYFDYW        | IGHJ4 | CSF | 15   |
| 57714 | 133 | Connecting to PB | CSF-Naive_618_IGM | IGHV2-70 | CARLTTSWYFDYW             | IGHJ4 | CSF | 60   |
| 57714 | 133 | Connecting to PB | USM_200000_IGM    | IGHV2-70 | CARLTTSWYFDYW             | IGHJ4 | PB  | 1    |
| 57714 | 134 | CSF exclusive    | CSF-Naive_618_IGM | IGHV1-2  | CARMRGYDFWSDNPPPYGMDVW    | IGHJ6 | CSF | 137  |
| 57714 | 135 | CSF exclusive    | CSF-Naive_618_IGM | IGHV3-53 | CARMVVLLPAGWDFPW          | IGHJ5 | CSF | 119  |
| 57714 | 136 | CSF exclusive    | CSF-Naive_618_IGM | IGHV4-39 | CARPACSDYEGGWDFPW         | IGHJ5 | CSF | 12   |
| 57714 | 137 | CSF exclusive    | CSF-Naive_618_IGM | IGHV1-8  | CARPDERGYSYGNLW           | IGHJ4 | CSF | 1082 |
| 57714 | 138 | CSF exclusive    | CSF-Naive_618_IGM | IGHV5-51 | CARPSSSWYFDYW             | IGHJ4 | CSF | 70   |
| 57714 | 139 | CSF exclusive    | CSF-Naive_618_IGM | IGHV1-46 | CARPSYKLELGYGMDVW         | IGHJ6 | CSF | 1    |
| 57714 | 140 | CSF exclusive    | CSF-Naive_618_IGM | IGHV5-51 | CARRPSTVTMAYGLEGAFDIW     | IGHJ3 | CSF | 68   |
| 57714 | 141 | CSF exclusive    | CSF-Naive_618_IGM | IGHV4-39 | CARRSSNEVGATQMGAFDIW      | IGHJ3 | CSF | 722  |
| 57714 | 142 | CSF exclusive    | CSF-Naive_618_IGM | IGHV4-39 | CARRVVGDYGDYELDYW         | IGHJ4 | CSF | 1    |
| 57714 | 142 | CSF exclusive    | CSF-Naive_618_IGM | IGHV4-39 | CARRVVGDYGDYGLDYW         | IGHJ4 | CSF | 65   |
| 57714 | 143 | CSF exclusive    | CSF-Naive_618_IGM | IGHV4-31 | CARSAPPQWFPWP             | IGHJ5 | CSF | 444  |
| 57714 | 144 | CSF exclusive    | CSF-Naive_618_IGM | IGHV4-34 | CARSGCGGDCNLFYYYYGMDVW    | IGHJ6 | CSF | 49   |
| 57714 | 145 | CSF exclusive    | CSF-Naive_618_IGM | IGHV4-31 | CARSIAAASNDALDIW          | IGHJ3 | CSF | 1    |
| 57714 | 145 | CSF exclusive    | CSF-Naive_618_IGM | IGHV4-31 | CARSIAAAGNDAFDIW          | IGHJ3 | CSF | 173  |
| 57714 | 146 | CSF exclusive    | CSF-Naive_618_IGM | IGHV4-59 | CARSNINWFYFDYW            | IGHJ4 | CSF | 129  |
| 57714 | 147 | CSF exclusive    | CSF-Naive_618_IGM | IGHV4-39 | CARSRPDPYYYYGMDVW         | IGHJ6 | CSF | 234  |
| 57714 | 148 | CSF exclusive    | CSF-Naive_618_IGM | IGHV4-59 | CARVAVAGPISIFDYW          | IGHJ4 | CSF | 147  |
| 57714 | 149 | CSF exclusive    | CSF-Naive_618_IGM | IGHV3-7  | CARVEYLLLLLIYYGMDAW       | IGHJ6 | CSF | 1    |
| 57714 | 149 | CSF exclusive    | CSF-Naive_618_IGM | IGHV3-7  | CARVGYQLLLLIYYGMDAW       | IGHJ6 | CSF | 1    |
| 57714 | 149 | CSF exclusive    | CSF-Naive_618_IGM | IGHV3-7  | CARVEYQLLLLIYYGMDAW       | IGHJ6 | CSF | 4    |
| 57714 | 149 | CSF exclusive    | CSF-Naive_618_IGM | IGHV3-7  | CARVEYQLLLLIYYGMDVW       | IGHJ6 | CSF | 18   |
| 57714 | 150 | CSF exclusive    | CSF-Naive_618_IGM | IGHV3-21 | CARVGHSSSDYYYGMDVW        | IGHJ6 | CSF | 4    |
| 57714 | 151 | CSF exclusive    | CSF-Naive_618_IGM | IGHV3-53 | CARVKGAFDIW               | IGHJ3 | CSF | 91   |
| 57714 | 152 | CSF exclusive    | CSF-Naive_618_IGM | IGHV1-18 | CARVLLGSSAWDGGYW          | IGHJ4 | CSF | 86   |
| 57714 | 153 | CSF exclusive    | CSF-Naive_618_IGM | IGHV3-20 | CARVSGYDSSGYYGYW          | IGHJ4 | CSF | 19   |
| 57714 | 154 | CSF exclusive    | CSF-Naive_618_IGM | IGHV4-39 | CARYAEGLPFPYW             | IGHJ4 | CSF | 96   |
| 57714 | 155 | CSF exclusive    | CSF-Naive_618_IGM | IGHV3-30 | CASAGDQLGSRHDYW           | IGHJ4 | CSF | 17   |
| 57714 | 156 | CSF exclusive    | CSF-Naive_618_IGM | IGHV3-30 | CASDLIVGSDYDSSMLPFDIAFDIW | IGHJ3 | CSF | 10   |
| 57714 | 157 | CSF exclusive    | CSF-Naive_618_IGM | IGHV3-30 | CASDLQGPL                 | IGHJ5 | CSF | 35   |
| 57714 | 158 | CSF exclusive    | CSF-Naive_618_IGM | IGHV3-30 | CASDPSPEGGYYPDYW          | IGHJ4 | CSF | 87   |
| 57714 | 159 | CSF exclusive    | CSF-Naive_618_IGM | IGHV3-30 | CASDPPTSYYYGSGSYFDYW      | IGHJ4 | CSF | 77   |
| 57714 | 160 | CSF exclusive    | CSF-Naive_618_IGM | IGHV1-2  | CASGGYDGSDFDYW            | IGHJ4 | CSF | 881  |
| 57714 | 161 | CSF exclusive    | CSF-Naive_618_IGM | IGHV4-34 | CASGSGGSCYSGRWCAFDIW      | IGHJ3 | CSF | 60   |
| 57714 | 162 | CSF exclusive    | CSF-Naive_618_IGM | IGHV5-51 | CASLPGYGDYFDYW            | IGHJ4 | CSF | 24   |
| 57714 | 163 | CSF exclusive    | CSF-Naive_618_IGM | IGHV3-53 | CASRLYDSSSGYQTDYW         | IGHJ4 | CSF | 26   |
| 57714 | 164 | CSF exclusive    | CSF-Naive_618_IGM | IGHV4-34 | CASSFGLELLYW              | IGHJ4 | CSF | 792  |
| 57714 | 165 | CSF exclusive    | CSF-Naive_618_IGM | IGHV1-69 | CASTGSDILTYWWDYW          | IGHJ4 | CSF | 3    |
| 57714 | 166 | CSF exclusive    | CSF-Naive_618_IGM | IGHV4-34 | CASITLMGFDIW              | IGHJ3 | CSF | 152  |
| 57714 | 167 | CSF exclusive    | CSF-Naive_618_IGM | IGHV4-59 | CASVTWTDWDFPW             | IGHJ5 | CSF | 161  |
| 57714 | 168 | CSF exclusive    | CSF-Naive_618_IGM | IGHV4-59 | CASYDSSGYYHW              | IGHJ5 | CSF | 246  |
| 57714 | 169 | CSF exclusive    | CSF-Naive_618_IGM | IGHV3-21 | CATGNDYGDYEDDYW           | IGHJ4 | CSF | 76   |
| 57714 | 170 | CSF exclusive    | CSF-Naive_618_IGM | IGHV1-8  | CATKRREMDVW               | IGHJ6 | CSF | 273  |
| 57714 | 171 | Connecting to PB | CSF-Naive_618_IGM | IGHV3-7  | CATVIFRGPFDYW             | IGHJ4 | CSF | 55   |
| 57714 | 171 | Connecting to PB | USM_200000_IGM    | IGHV3-7  | CATLIFRGPFDYW             | IGHJ4 | PB  | 1    |
| 57714 | 171 | Connecting to PB | USM_200000_IGM    | IGHV3-7  | CATEMFRGPFYDW             | IGHJ4 | PB  | 3    |
| 57714 | 171 | Connecting to PB | USM_200000_IGM    | IGHV3-7  | CATVIFRGPFDYW             | IGHJ4 | PB  | 13   |
| 57714 | 172 | Connecting to PB | CSF-Naive_618_IGM | IGHV2-70 | CAWIRRAWEHEDW             | IGHJ4 | CSF | 1    |
| 57714 | 172 | Connecting to PB | SM_178484_IGG     | IGHV2-70 | CAWMRRAWEHEDW             | IGHJ4 | PB  | 2    |
| 57714 | 172 | Connecting to PB | USM_200000_IGM    | IGHV2-70 | CAWMRRAWEHEDW             | IGHJ4 | PB  | 29   |
| 57714 | 172 | Connecting to PB | SM_178484_IGM     | IGHV2-70 | CAWMRRAWEHEDW             | IGHJ4 | PB  | 479  |
| 57714 | 172 | Connecting to PB | PC_16850_IGM      | IGHV2-70 | CAWMRRAWEHEDW             | IGHJ4 | PB  | 1725 |
| 57714 | 172 | Connecting to PB | PC_16850_IGG      | IGHV2-70 | CAWMRRAWEHEDW             | IGHJ4 | PB  | 4608 |
| 57714 | 173 | CSF exclusive    | CSF-Naive_618_IGM | IGHV3-23 | CESLGYCSGGSCLLAYW         | IGHJ4 | CSF | 46   |
| 57714 | 174 | CSF exclusive    | CSF-Naive_618_IGM | IGHV3-9  | CTKDRLLWPLSHAFDIW         | IGHJ3 | CSF | 3    |
| 57714 | 175 | CSF exclusive    | CSF-Naive_618_IGM | IGHV3-15 | CTPDLLAVRVDYW             | IGHJ4 | CSF | 13   |
| 57714 | 176 | CSF exclusive    | CSF-Naive_618_IGM | IGHV3-15 | CTRIFAGSSYGMDVW           | IGHJ6 | CSF | 43   |
| 57714 | 177 | CSF exclusive    | CSF-Naive_618_IGM | IGHV3-73 | CTRRGDYYYGMDVW            | IGHJ6 | CSF | 57   |
| 57714 | 178 | CSF exclusive    | CSF-Naive_618_IGM | IGHV3-15 | CTTLGRDYDSLIDYW           | IGHJ4 | CSF | 28   |
| 57714 | 179 | CSF exclusive    | CSF-Naive_618_IGM | IGHV3-53 | CVQSGYGGNTFDSW            | IGHJ4 | CSF | 43   |
| 57714 | 180 | CSF exclusive    | CSF-Naive_618_IGM | IGHV3-30 | CVRRERFCSGTCCGMDVW        | IGHJ6 | CSF | 1    |
| 57714 | 181 | CSF exclusive    | CSF-Naive_618_IGM | IGHV2-70 | CVRIQRSSGWNWDFPW          | IGHJ5 | CSF | 112  |
| 57714 | 182 | CSF exclusive    | CSF-Naive_618_IGM | IGHV4-59 | CVRVLTRNNWDFPW            | IGHJ5 | CSF | 25   |
| 57714 | 183 | CSF exclusive    | CSF-PC_76_IGG     | IGHV4-55 | CAAGTKSWYILFEYW           | IGHJ4 | CSF | 263  |
| 57714 | 184 | Connecting to PB | CSF-PC_76_IGG     | IGHV4-55 | RAKERAYYGSATHQIWLIDLW     | IGHJ2 | CSF | 2    |
| 57714 | 184 | Connecting to PB | CSF-PC_76_IGG     | IGHV4-55 | CAKERAYYGSATHQIWLIDLW     | IGHJ2 | CSF | 23   |
| 57714 | 184 | Connecting to PB | SM_178484_IGG     | IGHV4-55 | CAKERAYYGSATHQIWLIDLW     | IGHJ2 | PB  | 2255 |
| 57714 | 184 | Connecting to PB | PC_16850_IGG      | IGHV4-55 | CAKERAYYGSATHQIWLIDLW     | IGHJ2 | PB  | 3621 |
| 57714 | 185 | CSF exclusive    | CSF-SM_890_IGG    | IGHV3-7  | CAKLLGHCTNGVCYPPYFDYW     | IGHJ4 | CSF | 6    |
| 57714 | 185 | CSF exclusive    | CSF-PC_76_IGG     | IGHV3-7  | CAKILGHCTNGVCYPPYFDYW     | IGHJ4 | CSF | 75   |
| 57714 | 185 | CSF exclusive    | CSF-PC_76_IGG     | IGHV3-7  | CAKILGHCTNGVCFPPYFDYW     | IGHJ4 | CSF | 373  |
| 57714 | 185 | CSF exclusive    | CSF-SM_890_IGG    | IGHV3-7  | CAKILGHCTNGVCYPPYFDYW     | IGHJ4 | CSF | 560  |
| 57714 | 186 | CSF exclusive    | CSF-PC_76_IGG     | IGHV4-31 | CAREAGYNGFVDPW            | IGHJ5 | CSF | 65   |
| 57714 | 187 | CSF exclusive    | CSF-PC_76_IGG     | IGHV4-31 | CAREGSEYRYGPPTAW          | IGHJ5 | CSF | 803  |
| 57714 | 188 | CSF exclusive    | CSF-PC_76_IGG     | IGHV2-70 | CARETGDRQRYPDFW           | IGHJ4 | CSF | 580  |
| 57714 | 188 | CSF exclusive    | CSF-SM_890_IGG    | IGHV2-70 | CARETGDRQRYPDFW           | IGHJ4 | CSF | 1412 |

|       |     |                  |                |          |                              |       |     |       |
|-------|-----|------------------|----------------|----------|------------------------------|-------|-----|-------|
| 57714 | 189 | CSF exclusive    | CSF-PC_76_IGG  | IGHV3-13 | CARFARLEVDGVPVGYGLDVW        | IGHJ6 | CSF | 228   |
| 57714 | 190 | CSF exclusive    | CSF-PC_76_IGG  | IGHV3-7  | CARGFSDWQLLPGLFDYW           | IGHJ4 | CSF | 700   |
| 57714 | 190 | CSF exclusive    | CSF-SM_890_IGG | IGHV3-7  | CARGFSDWQLLPGLFDYW           | IGHJ4 | CSF | 4994  |
| 57714 | 191 | Connecting to PB | CSF-PC_76_IGG  | IGHV1-8  | CARGRGYDSSGYWYDDYGMVW        | IGHJ6 | CSF | 1     |
| 57714 | 191 | Connecting to PB | PC_16850_IGG   | IGHV1-8  | CARGRGYDSSGYWYDDYGMVW        | IGHJ6 | PB  | 1536  |
| 57714 | 192 | Connecting to PB | CSF-PC_76_IGG  | IGHV4-59 | CARGSIDGNQYGMVW              | IGHJ6 | CSF | 3     |
| 57714 | 192 | Connecting to PB | CSF-SM_890_IGG | IGHV4-59 | CARGSTDGYNQYGMVW             | IGHJ6 | CSF | 3714  |
| 57714 | 192 | Connecting to PB | CSF-PC_76_IGG  | IGHV4-59 | CARGSTDGYNQYGMVW             | IGHJ6 | CSF | 5998  |
| 57714 | 192 | Connecting to PB | PC_16850_IGG   | IGHV4-59 | CARGSTDGYNQYGMVW             | IGHJ6 | PB  | 3     |
| 57714 | 193 | CSF exclusive    | CSF-PC_76_IGG  | IGHV4-39 | CARHANLIPSTITGVNYFDYW        | IGHJ4 | CSF | 740   |
| 57714 | 194 | CSF exclusive    | CSF-PC_76_IGG  | IGHV2-70 | CARIQRGPYTSGWYHFDYW          | IGHJ4 | CSF | 8     |
| 57714 | 194 | CSF exclusive    | CSF-SM_890_IGG | IGHV2-70 | CARIQRGPYTSGWYHFDYW          | IGHJ4 | CSF | 352   |
| 57714 | 195 | CSF exclusive    | CSF-PC_76_IGG  | IGHV4-39 | CARQRDYDSSGSLKPLYFDSW        | IGHJ4 | CSF | 745   |
| 57714 | 196 | Connecting to PB | CSF-PC_76_IGG  | IGHV1-18 | CARVDVYGDYADYW               | IGHJ4 | CSF | 1     |
| 57714 | 196 | Connecting to PB | PC_16850_IGM   | IGHV1-18 | CARVDVYGDYADYW               | IGHJ4 | PB  | 6     |
| 57714 | 196 | Connecting to PB | PC_16850_IGG   | IGHV1-18 | CARVDVYGDYADYW               | IGHJ4 | PB  | 1598  |
| 57714 | 197 | Connecting to PB | CSF-PC_76_IGG  | IGHV4-31 | CARVTEWQHYFDYW               | IGHJ4 | CSF | 1     |
| 57714 | 197 | Connecting to PB | CSF-PC_76_IGG  | IGHV4-31 | CARVLEWPHYFDYW               | IGHJ4 | CSF | 1893  |
| 57714 | 197 | Connecting to PB | CSF-SM_890_IGG | IGHV4-31 | CARVLEWPHYFDYW               | IGHJ4 | CSF | 3768  |
| 57714 | 197 | Connecting to PB | SM_178484_IGG  | IGHV4-31 | CARVTEWPHYFDYW               | IGHJ4 | PB  | 7     |
| 57714 | 198 | CSF exclusive    | CSF-PC_76_IGG  | IGHV4-31 | CARWSEYFDYW                  | IGHJ4 | CSF | 1383  |
| 57714 | 199 | CSF exclusive    | CSF-PC_76_IGG  | IGHV6-1  | CARWSLDIPLVDSFYDGLDVW        | IGHJ6 | CSF | 961   |
| 57714 | 200 | CSF exclusive    | CSF-PC_76_IGG  | IGHV4-39 | CATGPPAGGYWYFDLW             | IGHJ2 | CSF | 1     |
| 57714 | 200 | CSF exclusive    | CSF-PC_76_IGG  | IGHV4-39 | CATGPPAGRYWYFDLW             | IGHJ2 | CSF | 39    |
| 57714 | 201 | Connecting to PB | CSF-PC_76_IGG  | IGHV4-28 | CATNTIHETPTYENTGYHYLDHW      | IGHJ4 | CSF | 2485  |
| 57714 | 201 | Connecting to PB | CSF-SM_890_IGG | IGHV4-28 | CATNTIHETPTYENTGYHYLDHW      | IGHJ4 | CSF | 3953  |
| 57714 | 201 | Connecting to PB | SM_178484_IGG  | IGHV4-28 | CATNTIHESPTYENTGYHYLDHW      | IGHJ4 | PB  | 9     |
| 57714 | 202 | CSF exclusive    | CSF-PC_76_IGG  | IGHV4-55 | CATSHYSDATDSYHYFANW          | IGHJ4 | CSF | 163   |
| 57714 | 203 | CSF exclusive    | CSF-PC_76_IGG  | IGHV4-39 | CSRSYWNVDYRNNPYYFDYW         | IGHJ4 | CSF | 673   |
| 57714 | 204 | Connecting to PB | CSF-SM_890_IGG | IGHV2-5  | CAHSQYHYDSNWWGYFLHW          | IGHJ1 | CSF | 13168 |
| 57714 | 204 | Connecting to PB | SM_178484_IGG  | IGHV2-5  | CAHSQYDYDSNWWGYFLHW          | IGHJ1 | PB  | 63    |
| 57714 | 205 | CSF exclusive    | CSF-SM_890_IGG | IGHV2-5  | CAHVACFSTSCYTNWFDPW          | IGHJ5 | CSF | 32    |
| 57714 | 206 | CSF exclusive    | CSF-SM_890_IGG | IGHV3-23 | CAKALTTVTKSAFDIW             | IGHJ3 | CSF | 16    |
| 57714 | 207 | CSF exclusive    | CSF-SM_890_IGG | IGHV3-23 | CAKDNPSFVVVANSWFDPW          | IGHJ5 | CSF | 3     |
| 57714 | 208 | CSF exclusive    | CSF-SM_890_IGG | IGHV3-23 | CVKDDQVLPAAVVRVAATMSDW       | IGHJ5 | CSF | 3     |
| 57714 | 208 | CSF exclusive    | CSF-SM_890_IGG | IGHV3-23 | CAKDDQVLPAAVVRVAATMSDW       | IGHJ5 | CSF | 9     |
| 57714 | 209 | CSF exclusive    | CSF-SM_890_IGG | IGHV3-30 | CAKEGGELATLRSYAFDIW          | IGHJ3 | CSF | 11    |
| 57714 | 210 | CSF exclusive    | CSF-SM_890_IGG | IGHV3-48 | CALYYYYGSGSPGYW              | IGHJ4 | CSF | 10    |
| 57714 | 211 | CSF exclusive    | CSF-SM_890_IGG | IGHV3-7  | CAMRGLYSTAWYADFW             | IGHJ4 | CSF | 11    |
| 57714 | 212 | CSF exclusive    | CSF-SM_890_IGG | IGHV4-31 | CARARGIQVWLEASGHFDSW         | IGHJ4 | CSF | 44    |
| 57714 | 213 | CSF exclusive    | CSF-SM_890_IGG | IGHV4-39 | CARDEKRGWELLRGRDLWL          | IGHJ3 | CSF | 36    |
| 57714 | 214 | CSF exclusive    | CSF-SM_890_IGG | IGHV4-39 | CARDPRSIVVVVPAAGFDYW         | IGHJ4 | CSF | 16    |
| 57714 | 215 | CSF exclusive    | CSF-SM_890_IGG | IGHV6-1  | CARDRDDGPTDRFDSW             | IGHJ5 | CSF | 5     |
| 57714 | 215 | CSF exclusive    | CSF-SM_890_IGG | IGHV6-1  | CARDRDDGDLTDRFDSW            | IGHJ5 | CSF | 62    |
| 57714 | 216 | CSF exclusive    | CSF-SM_890_IGG | IGHV3-53 | CARDRPGPTPGTYGMDVW           | IGHJ6 | CSF | 5     |
| 57714 | 217 | CSF exclusive    | CSF-SM_890_IGG | IGHV4-34 | CARDSYGEGIDVW                | IGHJ6 | CSF | 20    |
| 57714 | 218 | CSF exclusive    | CSF-SM_890_IGG | IGHV3-7  | CARDWHSSSRYSWGFLDFW          | IGHJ4 | CSF | 9     |
| 57714 | 219 | CSF exclusive    | CSF-SM_890_IGG | IGHV4-31 | CAREGASQQLLGHFDLW            | IGHJ2 | CSF | 3     |
| 57714 | 220 | CSF exclusive    | CSF-SM_890_IGG | IGHV3-23 | CAREIRIPVAGTVGFDPW           | IGHJ5 | CSF | 3     |
| 57714 | 221 | CSF exclusive    | CSF-SM_890_IGG | IGHV4-59 | CAREKISLAANDYW               | IGHJ4 | CSF | 84    |
| 57714 | 222 | CSF exclusive    | CSF-SM_890_IGG | IGHV3-7  | CAREVDHDFWSGYRPTNWFDPW       | IGHJ5 | CSF | 618   |
| 57714 | 223 | CSF exclusive    | CSF-SM_890_IGG | IGHV4-59 | CAREVYRDPSPFCW               | IGHJ4 | CSF | 6     |
| 57714 | 224 | CSF exclusive    | CSF-SM_890_IGG | IGHV1-18 | CARGGAEIYSGTYVAFDIW          | IGHJ3 | CSF | 36    |
| 57714 | 225 | CSF exclusive    | CSF-SM_890_IGG | IGHV4-39 | CARGKTAADIRVKWFDPW           | IGHJ5 | CSF | 12    |
| 57714 | 226 | Connecting to PB | CSF-SM_890_IGG | IGHV1-2  | CARGLSYTDSNGYTFDIW           | IGHJ3 | CSF | 6     |
| 57714 | 226 | Connecting to PB | DN_87942_IGG   | IGHV1-2  | CARGLSYDDNSGYTFDIW           | IGHJ3 | PB  | 31    |
| 57714 | 227 | CSF exclusive    | CSF-SM_890_IGG | IGHV3-7  | CARGPNDYVWTSFRGYDYW          | IGHJ4 | CSF | 10    |
| 57714 | 228 | CSF exclusive    | CSF-SM_890_IGG | IGHV4-39 | CARGRISMVGRVISCYLDYW         | IGHJ4 | CSF | 80    |
| 57714 | 229 | Connecting to PB | CSF-SM_890_IGG | IGHV1-3  | CARGTINPGSSTYWHLDLW          | IGHJ2 | CSF | 2     |
| 57714 | 229 | Connecting to PB | PC_16850_IGG   | IGHV1-3  | CARGTINPGSSTYWHLDLW          | IGHJ2 | PB  | 905   |
| 57714 | 230 | CSF exclusive    | CSF-SM_890_IGG | IGHV4-28 | CARHKATRAFDYW                | IGHJ4 | CSF | 4     |
| 57714 | 231 | CSF exclusive    | CSF-SM_890_IGG | IGHV4-39 | CARHPTSSRLDSFDVW             | IGHJ3 | CSF | 18    |
| 57714 | 232 | CSF exclusive    | CSF-SM_890_IGG | IGHV4-39 | CARHPYTSYDVSQYGGFDYW         | IGHJ4 | CSF | 37    |
| 57714 | 233 | CSF exclusive    | CSF-SM_890_IGG | IGHV4-39 | CARHPYTSYDVSQYGGFDYWGQGGFDYW | IGHJ4 | CSF | 5022  |
| 57714 | 234 | CSF exclusive    | CSF-SM_890_IGG | IGHV4-39 | CARLDLATIKNYFDYW             | IGHJ4 | CSF | 1817  |
| 57714 | 235 | Connecting to PB | CSF-SM_890_IGG | IGHV4-28 | CARLSGGYTYGYTPYHGMVW         | IGHJ6 | CSF | 2816  |
| 57714 | 235 | Connecting to PB | DN_87942_IGG   | IGHV4-28 | CARLSGGCTYGYTPYHGMVW         | IGHJ6 | PB  | 1     |
| 57714 | 235 | Connecting to PB | DN_87942_IGG   | IGHV4-28 | CARLSGGYTYGYTPYHGMVW         | IGHJ6 | PB  | 14    |
| 57714 | 235 | Connecting to PB | SM_178484_IGG  | IGHV4-28 | CARLSGGYTYGYTPYHGMVW         | IGHJ6 | PB  | 15    |
| 57714 | 236 | CSF exclusive    | CSF-SM_890_IGG | IGHV3-7  | CARRDPATIIDLTGYKYW           | IGHJ4 | CSF | 67    |
| 57714 | 237 | CSF exclusive    | CSF-SM_890_IGG | IGHV5-51 | CARREDEFDYW                  | IGHJ4 | CSF | 13    |
| 57714 | 238 | CSF exclusive    | CSF-SM_890_IGG | IGHV4-55 | CARRGIVVVAAAVYQDNGMDVW       | IGHJ6 | CSF | 48    |
| 57714 | 239 | Connecting to PB | CSF-SM_890_IGG | IGHV1-69 | CARVGVQYNTSQKDYDDYMDVW       | IGHJ6 | CSF | 1     |
| 57714 | 239 | Connecting to PB | DN_87942_IGG   | IGHV1-69 | CARVGVQYNTSQKDYDDYMDVW       | IGHJ6 | PB  | 14    |
| 57714 | 240 | CSF exclusive    | CSF-SM_890_IGG | IGHV4-28 | CARVRSHLTYGSGSLDYW           | IGHJ4 | CSF | 61    |
| 57714 | 241 | Connecting to PB | CSF-SM_890_IGG | IGHV4-39 | CARYNGSIAAAGACW              | IGHJ4 | CSF | 14    |
| 57714 | 241 | Connecting to PB | SM_178484_IGG  | IGHV4-39 | CARYNGSIAAAGACW              | IGHJ4 | PB  | 9     |
| 57714 | 242 | CSF exclusive    | CSF-SM_890_IGG | IGHV3-30 | CASDRGHCTNGVCYGMVW           | IGHJ3 | CSF | 2     |
| 57714 | 243 | CSF exclusive    | CSF-SM_890_IGG | IGHV4-39 | CASGQCTSTSCYTPADHW           | IGHJ4 | CSF | 400   |
| 57714 | 244 | Connecting to PB | CSF-SM_890_IGG | IGHV4-39 | CASHRGLRPHYLDYW              | IGHJ4 | CSF | 5     |
| 57714 | 244 | Connecting to PB | SM_178484_IGG  | IGHV4-39 | CASHRGLRPHYLDYW              | IGHJ4 | PB  | 5     |
| 57714 | 245 | CSF exclusive    | CSF-SM_890_IGG | IGHV3-53 | CASWFPSTSEIW                 | IGHJ3 | CSF | 43    |
| 57714 | 246 | CSF exclusive    | CSF-SM_890_IGG | IGHV4-28 | CGRLSGGYTYGYTPCHHGMVW        | IGHJ6 | CSF | 1     |
| 57714 | 247 | CSF exclusive    | CSF-SM_890_IGG | IGHV4-39 | CTREGGNGQLLW                 | IGHJ5 | CSF | 73    |
| 57714 | 248 | CSF exclusive    | CSF-SM_890_IGG | IGHV4-39 | CTREIVGAMANIDYW              | IGHJ4 | CSF | 4130  |

|       |     |                  |                  |          |                        |       |     |     |
|-------|-----|------------------|------------------|----------|------------------------|-------|-----|-----|
| 57714 | 249 | Connecting to PB | CSF-SM_890_IGG   | IGHV3-23 | CVKAVEEGIRPHYW         | IGHJ4 | CSF | 25  |
| 57714 | 249 | Connecting to PB | USM_200000_IGM   | IGHV3-23 | CVKAVEEGIRPHFW         | IGHJ4 | PB  | 1   |
| 57714 | 249 | Connecting to PB | SM_178484_IGG    | IGHV3-23 | CVKAVEEGIRPHYW         | IGHJ4 | PB  | 7   |
| 57714 | 249 | Connecting to PB | PC_16850_IGG     | IGHV3-23 | CVKAVEEGIRPHYW         | IGHJ4 | PB  | 123 |
| 57714 | 250 | CSF exclusive    | CSF-SM_890_IGG   | IGHV4-34 | CVQSDAYEGCSGGTCHSYFDYW | IGHJ4 | CSF | 3   |
| 57714 | 251 | Connecting to PB | CSF-SM_890_IGG   | IGHV3-7  | CVRPDSRGYYYPDYW        | IGHJ4 | CSF | 1   |
| 57714 | 251 | Connecting to PB | USM_200000_IGM   | IGHV3-7  | CARPDPSRGYYYPDYW       | IGHJ4 | PB  | 1   |
| 57714 | 252 | CSF exclusive    | CSF-SM_890_IGG   | IGHV4-28 | CVTLMTNTAMVLFW         | IGHJ4 | CSF | 15  |
| 57714 | 253 | CSF exclusive    | CSF-USM_999_IGM  | IGHV1-58 | CAAARSTVTTTRGWFDPW     | IGHJ5 | CSF | 27  |
| 57714 | 253 | CSF exclusive    | CSF-USM_999_IGM  | IGHV1-58 | CAAARNVTVTTTRGWFDPW    | IGHJ5 | CSF | 199 |
| 57714 | 254 | Connecting to PB | CSF-USM_999_IGM  | IGHV3-11 | CAGGDSSTYFYHYW         | IGHJ4 | CSF | 19  |
| 57714 | 254 | Connecting to PB | USM_200000_IGM   | IGHV3-11 | CVGGDSSTYFYHYW         | IGHJ4 | PB  | 1   |
| 57714 | 254 | Connecting to PB | SM_178484_IGM    | IGHV3-11 | CAGGDSSTYFYHYW         | IGHJ4 | PB  | 2   |
| 57714 | 254 | Connecting to PB | PC_16850_IGM     | IGHV3-11 | CAGGDSSTYFYHYW         | IGHJ4 | PB  | 83  |
| 57714 | 255 | CSF exclusive    | CSF-USM_999_IGM  | IGHV3-74 | CAGGDYYDSSGYYKAAFYDLW  | IGHJ2 | CSF | 32  |
| 57714 | 256 | CSF exclusive    | CSF-USM_999_IGM  | IGHV4-39 | CAGRAERSPYSVW          | IGHJ4 | CSF | 170 |
| 57714 | 257 | Connecting to PB | CSF-USM_999_IGM  | IGHV4-59 | CAGRGSYGPFDIW          | IGHJ3 | CSF | 52  |
| 57714 | 257 | Connecting to PB | USM_200000_IGM   | IGHV4-59 | CAGRGSYGPFDIW          | IGHJ3 | PB  | 3   |
| 57714 | 258 | CSF exclusive    | CSF-USM_999_IGM  | IGHV3-38 | CAGSITTTGAFDYW         | IGHJ4 | CSF | 21  |
| 57714 | 259 | CSF exclusive    | CSF-USM_999_IGM  | IGHV3-23 | CAKDALGEVIIIIYFDYW     | IGHJ4 | CSF | 38  |
| 57714 | 260 | CSF exclusive    | CSF-USM_999_IGM  | IGHV3-30 | CAKDGYSWGPLDYW         | IGHJ4 | CSF | 15  |
| 57714 | 261 | Connecting to PB | CSF-USM_999_IGM  | IGHV3-9  | CAKDIGQPADYW           | IGHJ4 | CSF | 70  |
| 57714 | 261 | Connecting to PB | USM_200000_IGM   | IGHV3-9  | CAKDLGQPADHW           | IGHJ4 | PB  | 2   |
| 57714 | 261 | Connecting to PB | USM_200000_IGM   | IGHV3-9  | CAKDVGPADYW            | IGHJ4 | PB  | 5   |
| 57714 | 261 | Connecting to PB | USM_200000_IGM   | IGHV3-9  | CAKDIGQPADYW           | IGHJ4 | PB  | 49  |
| 57714 | 262 | CSF exclusive    | CSF-USM_999_IGM  | IGHV3-9  | CAKDISVTTFFYFDYW       | IGHJ4 | CSF | 34  |
| 57714 | 263 | CSF exclusive    | CSF-USM_999_IGM  | IGHV3-23 | CAKDLLAPAPRYYYYYFGMDVW | IGHJ6 | CSF | 8   |
| 57714 | 264 | CSF exclusive    | CSF-USM_999_IGM  | IGHV3-23 | CAKDLTTSSEIDFW         | IGHJ4 | CSF | 34  |
| 57714 | 265 | CSF exclusive    | CSF-USM_999_IGM  | IGHV3-23 | CAKDPNSTPNYYGLDVW      | IGHJ6 | CSF | 2   |
| 57714 | 266 | Connecting to PB | CSF-USM_999_IGM  | IGHV3-30 | CAKDWRRHSPDYGMNVW      | IGHJ6 | CSF | 13  |
| 57714 | 266 | Connecting to PB | USM_200000_IGM   | IGHV3-30 | CAKDWRRHSPDYGMNVW      | IGHJ6 | PB  | 4   |
| 57714 | 267 | CSF exclusive    | CSF-USM_999_IGM  | IGHV3-23 | CAKDYLDSSGYLGSFDYW     | IGHJ4 | CSF | 6   |
| 57714 | 268 | CSF exclusive    | CSF-USM_999_IGM  | IGHV4-59 | CAKEARTAVAESGYW        | IGHJ4 | CSF | 34  |
| 57714 | 269 | CSF exclusive    | CSF-USM_999_IGM  | IGHV3-23 | CAKEGAVAGIGYFQHW       | IGHJ1 | CSF | 56  |
| 57714 | 270 | CSF exclusive    | CSF-USM_999_IGM  | IGHV3-23 | CAKELGGAPRFGAYW        | IGHJ4 | CSF | 18  |
| 57714 | 271 | Connecting to PB | CSF-USM_999_IGM  | IGHV3-9  | CAKEVRNKGILDYW         | IGHJ4 | CSF | 78  |
| 57714 | 271 | Connecting to PB | USM_200000_IGM   | IGHV3-9  | CAKEVRNKGILDYW         | IGHJ4 | PB  | 1   |
| 57714 | 271 | Connecting to PB | USM_200000_IGM   | IGHV3-9  | CAKEVRNKGILDYW         | IGHJ4 | PB  | 3   |
| 57714 | 271 | Connecting to PB | SM_178484_IGM    | IGHV3-9  | CAKEVRNKGILDYW         | IGHJ4 | PB  | 4   |
| 57714 | 271 | Connecting to PB | PC_16850_IGM     | IGHV3-9  | CAKEVRNKGILDYW         | IGHJ4 | PB  | 80  |
| 57714 | 272 | CSF exclusive    | CSF-USM_999_IGM  | IGHV3-23 | CAKGFYESGSSTTNLDYW     | IGHJ4 | CSF | 9   |
| 57714 | 273 | CSF exclusive    | CSF-USM_999_IGM  | IGHV3-9  | CAKGGTTSAYAMDYW        | IGHJ6 | CSF | 46  |
| 57714 | 274 | CSF exclusive    | CSF-USM_999_IGM  | IGHV3-23 | CAKGLGAYCDGDCRSRILDFW  | IGHJ4 | CSF | 2   |
| 57714 | 275 | Connecting to PB | CSF-USM_999_IGM  | IGHV3-23 | CAKLVTYDYW             | IGHJ4 | CSF | 60  |
| 57714 | 275 | Connecting to PB | USM_200000_IGM   | IGHV3-23 | CAKVVTYDYW             | IGHJ4 | PB  | 2   |
| 57714 | 276 | CSF exclusive    | CSF-USM_999_IGM  | IGHV3-23 | CAKTYYYDSRGYFQYFDHW    | IGHJ4 | CSF | 10  |
| 57714 | 277 | CSF exclusive    | CSF-USM_999_IGM  | IGHV3-23 | CAKVRPGLTSDFFDYW       | IGHJ4 | CSF | 58  |
| 57714 | 278 | Connecting to PB | CSF-USM_999_IGM  | IGHV4-55 | CALSSGWYKIDYW          | IGHJ4 | CSF | 298 |
| 57714 | 278 | Connecting to PB | PC_16850_IGM     | IGHV4-55 | CALSSGWYKIDYW          | IGHJ4 | PB  | 1   |
| 57714 | 279 | CSF exclusive    | CSF-USM_999_IGM  | IGHV3-74 | CAMPFVAATQSGRYW        | IGHJ4 | CSF | 11  |
| 57714 | 280 | CSF exclusive    | CSF-USM_999_IGM  | IGHV3-23 | CANARVGYW              | IGHJ4 | CSF | 167 |
| 57714 | 281 | CSF exclusive    | CSF-USM_999_IGM  | IGHV3-23 | CANGRQIWAHFDYW         | IGHJ4 | CSF | 45  |
| 57714 | 282 | CSF exclusive    | CSF-USM_999_IGM  | IGHV3-7  | CANSAGAPGNYW           | IGHJ4 | CSF | 53  |
| 57714 | 283 | CSF exclusive    | CSF-USM_999_IGM  | IGHV3-53 | CARADTAVAGTIDYW        | IGHJ4 | CSF | 23  |
| 57714 | 284 | CSF exclusive    | CSF-USM_999_IGM  | IGHV3-7  | CARAEDRDTSGYFGALDMW    | IGHJ3 | CSF | 78  |
| 57714 | 285 | Connecting to PB | CSF-USM_999_IGM  | IGHV4-59 | CARAKGDDW              | IGHJ4 | CSF | 227 |
| 57714 | 285 | Connecting to PB | USM_200000_IGM   | IGHV4-59 | CARAKDDW               | IGHJ4 | PB  | 1   |
| 57714 | 285 | Connecting to PB | USM_200000_IGM   | IGHV4-59 | CARGKDDW               | IGHJ4 | PB  | 3   |
| 57714 | 285 | Connecting to PB | SM_178484_IGM    | IGHV4-59 | CARAKGDDW              | IGHJ4 | PB  | 10  |
| 57714 | 285 | Connecting to PB | USM_200000_IGM   | IGHV4-59 | CVRAKGDDW              | IGHJ4 | PB  | 17  |
| 57714 | 285 | Connecting to PB | SM_178484_IGG    | IGHV4-59 | CARAKGDDW              | IGHJ4 | PB  | 34  |
| 57714 | 285 | Connecting to PB | USM_200000_IGM   | IGHV4-59 | CARAKGDDW              | IGHJ4 | PB  | 110 |
| 57714 | 286 | CSF exclusive    | CSF-USM_999_IGM  | IGHV3-11 | CARARWERQSSRFDYW       | IGHJ4 | CSF | 11  |
| 57714 | 287 | Connecting to PB | CSF-USM_999_IGM  | IGHV4-34 | CARASAIHSDTSEGLDYW     | IGHJ4 | CSF | 15  |
| 57714 | 287 | Connecting to PB | USM_200000_IGM   | IGHV4-34 | CARASAIHSDTSEGLDYW     | IGHJ4 | PB  | 2   |
| 57714 | 288 | CSF exclusive    | CSF-USM_999_IGM  | IGHV3-74 | CARATGWSGYDSW          | IGHJ4 | CSF | 52  |
| 57714 | 289 | CSF exclusive    | CSF-USM_999_IGM  | IGHV3-48 | CARDNNWGFYD            | IGHJ4 | CSF | 61  |
| 57714 | 290 | Connecting to PB | CSF-USM_999_IGM  | IGHV1-18 | CARDGALGTSDYYGMDVW     | IGHJ6 | CSF | 1   |
| 57714 | 290 | Connecting to PB | SM_178484_IGM    | IGHV1-18 | CARDGALGTSDYYGMDVW     | IGHJ6 | PB  | 125 |
| 57714 | 291 | Connecting to PB | CSF-USM_999_IGM  | IGHV1-8  | CARDGKDVGTGLADSW       | IGHJ5 | CSF | 285 |
| 57714 | 291 | Connecting to PB | Naive_200000_IGM | IGHV1-8  | CVRDGKDVGTGLADSW       | IGHJ5 | PB  | 4   |
| 57714 | 291 | Connecting to PB | USM_200000_IGM   | IGHV1-8  | CARDGKDVGTGLVDSW       | IGHJ5 | PB  | 11  |
| 57714 | 291 | Connecting to PB | USM_200000_IGM   | IGHV1-8  | CVRDGKDVGTGLADSW       | IGHJ5 | PB  | 27  |
| 57714 | 292 | CSF exclusive    | CSF-USM_999_IGM  | IGHV3-7  | CARDGLGEVAERAASGMDVW   | IGHJ6 | CSF | 26  |
| 57714 | 293 | CSF exclusive    | CSF-USM_999_IGM  | IGHV3-53 | CARDGRPYGMDVW          | IGHJ6 | CSF | 86  |
| 57714 | 294 | CSF exclusive    | CSF-USM_999_IGM  | IGHV3-66 | CARDGWLDYW             | IGHJ4 | CSF | 12  |
| 57714 | 295 | CSF exclusive    | CSF-USM_999_IGM  | IGHV3-21 | CARDKYGDYVRTPW         | IGHJ5 | CSF | 29  |
| 57714 | 296 | Connecting to PB | CSF-USM_999_IGM  | IGHV3-48 | CARDLGSGRPLPDYW        | IGHJ4 | CSF | 130 |
| 57714 | 296 | Connecting to PB | USM_200000_IGM   | IGHV3-48 | CARDLGSGRPLPDYW        | IGHJ4 | PB  | 6   |
| 57714 | 297 | CSF exclusive    | CSF-USM_999_IGM  | IGHV3-21 | CARDMAAADGDYGFDIW      | IGHJ3 | CSF | 1   |
| 57714 | 298 | CSF exclusive    | CSF-USM_999_IGM  | IGHV3-53 | CARDPGGSGVPAGWLDPW     | IGHJ5 | CSF | 26  |
| 57714 | 298 | CSF exclusive    | CSF-USM_999_IGM  | IGHV3-53 | CARDPGGSRVTAGWLDPW     | IGHJ5 | CSF | 33  |
| 57714 | 299 | Connecting to PB | CSF-USM_999_IGM  | IGHV4-59 | CARDPWGLESFADYD        | IGHJ3 | CSF | 150 |
| 57714 | 299 | Connecting to PB | Naive_200000_IGM | IGHV4-59 | CARDPWGLESFADYD        | IGHJ3 | PB  | 2   |
| 57714 | 299 | Connecting to PB | USM_200000_IGM   | IGHV4-59 | CARDPWGLESFADYD        | IGHJ3 | PB  | 79  |



|       |     |                  |                  |          |                            |       |     |     |
|-------|-----|------------------|------------------|----------|----------------------------|-------|-----|-----|
| 57714 | 300 | CSF exclusive    | CSF-USM_999_IGM  | IGHV3-48 | CARDRPVAAADYW              | IGHJ4 | CSF | 31  |
| 57714 | 301 | CSF exclusive    | CSF-USM_999_IGM  | IGHV4-59 | CARDRVTVTTETHYYGRHV        | IGHJ6 | CSF | 2   |
| 57714 | 301 | CSF exclusive    | CSF-USM_999_IGM  | IGHV4-59 | CARDRVTVTTETHYYGMHV        | IGHJ6 | CSF | 57  |
| 57714 | 302 | CSF exclusive    | CSF-USM_999_IGM  | IGHV4-34 | CARDSSGSHPGIW              | IGHJ5 | CSF | 198 |
| 57714 | 303 | CSF exclusive    | CSF-USM_999_IGM  | IGHV1-18 | CARDSSQAAGKVDLW            | IGHJ5 | CSF | 30  |
| 57714 | 304 | CSF exclusive    | CSF-USM_999_IGM  | IGHV1-69 | CARDTLGSSGPNFQHW           | IGHJ1 | CSF | 52  |
| 57714 | 305 | CSF exclusive    | CSF-USM_999_IGM  | IGHV3-53 | CARDTMGLQSW                | IGHJ5 | CSF | 4   |
| 57714 | 306 | CSF exclusive    | CSF-USM_999_IGM  | IGHV1-3  | CARDWYCSGGSCYGAVAFDIW      | IGHJ3 | CSF | 59  |
| 57714 | 307 | CSF exclusive    | CSF-USM_999_IGM  | IGHV3-48 | CAREGEWWSYGTNYGMDVW        | IGHJ6 | CSF | 18  |
| 57714 | 308 | Connecting to PB | CSF-USM_999_IGM  | IGHV1-18 | CAREGGYNWNYEPPDYW          | IGHJ4 | CSF | 104 |
| 57714 | 308 | Connecting to PB | SM_178484_IGM    | IGHV1-18 | CAREGGYNWNYEPPDYW          | IGHJ4 | PB  | 74  |
| 57714 | 309 | Connecting to PB | CSF-USM_999_IGM  | IGHV3-21 | CAREGGYDSSGYLLRTDAFDIW     | IGHJ3 | CSF | 68  |
| 57714 | 309 | Connecting to PB | DN_87942_IGG     | IGHV3-21 | CVREGGYDSSGYLLRTDGFDIW     | IGHJ3 | PB  | 1   |
| 57714 | 309 | Connecting to PB | DN_87942_IGG     | IGHV3-21 | CAREGGYDSSGYLLRTDGFDIW     | IGHJ3 | PB  | 12  |
| 57714 | 309 | Connecting to PB | USM_200000_IGM   | IGHV3-21 | CAREGGYDSSGYLLRTDAFDIW     | IGHJ3 | PB  | 25  |
| 57714 | 310 | CSF exclusive    | CSF-USM_999_IGM  | IGHV3-7  | CAREGVPAAARYW              | IGHJ4 | CSF | 1   |
| 57714 | 310 | CSF exclusive    | CSF-USM_999_IGM  | IGHV3-7  | CAREGVPAAARDYW             | IGHJ4 | CSF | 18  |
| 57714 | 311 | Connecting to PB | CSF-USM_999_IGM  | IGHV1-3  | CAREHDFWSHYSFDYW           | IGHJ4 | CSF | 245 |
| 57714 | 311 | Connecting to PB | USM_200000_IGM   | IGHV1-3  | CAREHDSWSGYSFDYW           | IGHJ4 | PB  | 2   |
| 57714 | 311 | Connecting to PB | PC_16850_IGM     | IGHV1-3  | CAREHDFWSGYPFDYW           | IGHJ4 | PB  | 364 |
| 57714 | 312 | CSF exclusive    | CSF-USM_999_IGM  | IGHV3-21 | CARELVGAVARVDFW            | IGHJ4 | CSF | 3   |
| 57714 | 313 | CSF exclusive    | CSF-USM_999_IGM  | IGHV3-53 | CAREVNAFDIW                | IGHJ3 | CSF | 81  |
| 57714 | 314 | CSF exclusive    | CSF-USM_999_IGM  | IGHV4-39 | CARFTSGQGYDSSGYHITDRWYLDYW | IGHJ4 | CSF | 45  |
| 57714 | 315 | CSF exclusive    | CSF-USM_999_IGM  | IGHV3-74 | CARGEIYYDSSGYDLDLDPW       | IGHJ5 | CSF | 21  |
| 57714 | 316 | CSF exclusive    | CSF-USM_999_IGM  | IGHV3-74 | CARGDGTQEYYGYGMDVW         | IGHJ6 | CSF | 4   |
| 57714 | 317 | CSF exclusive    | CSF-USM_999_IGM  | IGHV3-48 | CARGGGYSGYDW               | IGHJ5 | CSF | 67  |
| 57714 | 318 | Connecting to PB | CSF-USM_999_IGM  | IGHV4-34 | CARGSSWYRDYW               | IGHJ4 | CSF | 300 |
| 57714 | 318 | Connecting to PB | USM_200000_IGM   | IGHV4-34 | CARGSSWYRDYW               | IGHJ4 | PB  | 51  |
| 57714 | 319 | Connecting to PB | CSF-USM_999_IGM  | IGHV3-30 | CARGGYRTTTSYGMVDW          | IGHJ6 | CSF | 36  |
| 57714 | 319 | Connecting to PB | SM_178484_IGM    | IGHV3-30 | CARGGYMTTTSYGMVDW          | IGHJ6 | PB  | 119 |
| 57714 | 320 | CSF exclusive    | CSF-USM_999_IGM  | IGHV3-74 | CARGGYRSEGFDIW             | IGHJ3 | CSF | 56  |
| 57714 | 321 | CSF exclusive    | CSF-USM_999_IGM  | IGHV3-21 | CARGLGYSGGRCYWFYDLW        | IGHJ2 | CSF | 65  |
| 57714 | 322 | CSF exclusive    | CSF-USM_999_IGM  | IGHV3-13 | CARGLLWFESFYGMDVW          | IGHJ6 | CSF | 21  |
| 57714 | 323 | CSF exclusive    | CSF-USM_999_IGM  | IGHV3-53 | CARGPNCGGTCGAFDIW          | IGHJ3 | CSF | 28  |
| 57714 | 324 | Connecting to PB | CSF-USM_999_IGM  | IGHV6-1  | CARGPPGGSMDVW              | IGHJ6 | CSF | 121 |
| 57714 | 324 | Connecting to PB | PC_16850_IGM     | IGHV6-1  | CARGPPGGSMDVW              | IGHJ6 | PB  | 1   |
| 57714 | 325 | Connecting to PB | CSF-USM_999_IGM  | IGHV4-59 | CARGPTVTTDYW               | IGHJ4 | CSF | 229 |
| 57714 | 325 | Connecting to PB | USM_200000_IGM   | IGHV4-59 | CARGPTVTTDFW               | IGHJ4 | PB  | 1   |
| 57714 | 325 | Connecting to PB | USM_200000_IGM   | IGHV4-59 | CARGPTVTTDCW               | IGHJ4 | PB  | 8   |
| 57714 | 325 | Connecting to PB | SM_178484_IGM    | IGHV4-59 | CARGPTVTTDYW               | IGHJ4 | PB  | 78  |
| 57714 | 326 | CSF exclusive    | CSF-USM_999_IGM  | IGHV4-28 | CARGQAVGATYYAMVDW          | IGHJ6 | CSF | 37  |
| 57714 | 327 | CSF exclusive    | CSF-USM_999_IGM  | IGHV3-7  | CARGRGNPNW                 | IGHJ4 | CSF | 155 |
| 57714 | 328 | Connecting to PB | CSF-USM_999_IGM  | IGHV1-2  | CARGRYSSGDFQHW             | IGHJ1 | CSF | 514 |
| 57714 | 328 | Connecting to PB | SM_178484_IGG    | IGHV1-2  | CARGRYSSGDFQHW             | IGHJ1 | PB  | 1   |
| 57714 | 329 | CSF exclusive    | CSF-USM_999_IGM  | IGHV3-53 | CARGSSRYCSGGNCYLDLDFW      | IGHJ4 | CSF | 19  |
| 57714 | 329 | CSF exclusive    | CSF-USM_999_IGM  | IGHV3-53 | CARGSSRYCSGGNCYLDLDFW      | IGHJ4 | CSF | 250 |
| 57714 | 330 | CSF exclusive    | CSF-USM_999_IGM  | IGHV1-3  | CARGSSSRGYRWFDPW           | IGHJ5 | CSF | 377 |
| 57714 | 331 | CSF exclusive    | CSF-USM_999_IGM  | IGHV4-59 | CARGYDVTSTF                | IGHJ5 | CSF | 81  |
| 57714 | 332 | Connecting to PB | CSF-USM_999_IGM  | IGHV4-34 | CARHGGFPQYW                | IGHJ1 | CSF | 162 |
| 57714 | 332 | Connecting to PB | USM_200000_IGM   | IGHV4-34 | CARHGGFPQHW                | IGHJ1 | PB  | 6   |
| 57714 | 332 | Connecting to PB | USM_200000_IGM   | IGHV4-34 | CARHGGFPQYW                | IGHJ1 | PB  | 12  |
| 57714 | 333 | CSF exclusive    | CSF-USM_999_IGM  | IGHV3-7  | CARHIMAVTEYYYGIDVW         | IGHJ6 | CSF | 11  |
| 57714 | 334 | CSF exclusive    | CSF-USM_999_IGM  | IGHV4-39 | CARHKGVVVAATPSLGYYYGMDVW   | IGHJ6 | CSF | 17  |
| 57714 | 335 | CSF exclusive    | CSF-USM_999_IGM  | IGHV4-39 | CARHQSTYNYGLDAFDIW         | IGHJ3 | CSF | 122 |
| 57714 | 336 | CSF exclusive    | CSF-USM_999_IGM  | IGHV3-7  | CARHQSTATTFDSW             | IGHJ4 | CSF | 3   |
| 57714 | 337 | Connecting to PB | CSF-USM_999_IGM  | IGHV2-26 | CARILPDEGNWFDPW            | IGHJ5 | CSF | 432 |
| 57714 | 337 | Connecting to PB | SM_178484_IGG    | IGHV2-26 | CARILPDEGNWFDPW            | IGHJ5 | PB  | 1   |
| 57714 | 338 | CSF exclusive    | CSF-USM_999_IGM  | IGHV4-34 | CARIPDSDPFGWFDSW           | IGHJ5 | CSF | 70  |
| 57714 | 339 | CSF exclusive    | CSF-USM_999_IGM  | IGHV4-34 | CARKDYSSGHLDLDFW           | IGHJ4 | CSF | 1   |
| 57714 | 339 | CSF exclusive    | CSF-USM_999_IGM  | IGHV4-34 | CARKDYSSGHFDLDFW           | IGHJ4 | CSF | 15  |
| 57714 | 340 | Connecting to PB | CSF-USM_999_IGM  | IGHV6-1  | CARLEPGDSSGHSFDYW          | IGHJ4 | CSF | 4   |
| 57714 | 340 | Connecting to PB | USM_200000_IGM   | IGHV6-1  | SARLEPGDSSGHSSDYW          | IGHJ4 | PB  | 1   |
| 57714 | 340 | Connecting to PB | USM_200000_IGM   | IGHV6-1  | CARLEPGDSSGHSSDYW          | IGHJ4 | PB  | 8   |
| 57714 | 340 | Connecting to PB | USM_200000_IGM   | IGHV6-1  | CARLEPGDSSGHSFDYW          | IGHJ4 | PB  | 26  |
| 57714 | 340 | Connecting to PB | USM_200000_IGM   | IGHV6-1  | CARLEPGDSSGHSSDSW          | IGHJ4 | PB  | 50  |
| 57714 | 341 | CSF exclusive    | CSF-USM_999_IGM  | IGHV4-39 | CARLGGSGSYYYW              | IGHJ4 | CSF | 55  |
| 57714 | 342 | Connecting to PB | CSF-USM_999_IGM  | IGHV1-8  | CARLGYCTTRCNWFDPW          | IGHJ5 | CSF | 322 |
| 57714 | 342 | Connecting to PB | USM_200000_IGM   | IGHV1-8  | CARLGYCTTRCNWFDPW          | IGHJ5 | PB  | 5   |
| 57714 | 343 | CSF exclusive    | CSF-USM_999_IGM  | IGHV4-39 | CARLMGSSWVDYW              | IGHJ4 | CSF | 70  |
| 57714 | 344 | CSF exclusive    | CSF-USM_999_IGM  | IGHV4-39 | CARLRWNSSPFDYW             | IGHJ4 | CSF | 67  |
| 57714 | 345 | CSF exclusive    | CSF-USM_999_IGM  | IGHV4-59 | CARLVAGEGPDYW              | IGHJ4 | CSF | 11  |
| 57714 | 346 | Connecting to PB | CSF-USM_999_IGM  | IGHV1-69 | CARLYDSSGSPSYFYW           | IGHJ4 | CSF | 321 |
| 57714 | 346 | Connecting to PB | SM_178484_IGM    | IGHV1-69 | CARVYDSSGSLSYFYW           | IGHJ4 | PB  | 2   |
| 57714 | 346 | Connecting to PB | USM_200000_IGM   | IGHV1-69 | CARVYHTSGSPSYFYW           | IGHJ4 | PB  | 18  |
| 57714 | 346 | Connecting to PB | USM_200000_IGM   | IGHV1-69 | CARVYDTIGSPSYFYW           | IGHJ4 | PB  | 59  |
| 57714 | 346 | Connecting to PB | SM_178484_IGM    | IGHV1-69 | CARLYDSSGSPSYFYW           | IGHJ4 | PB  | 79  |
| 57714 | 346 | Connecting to PB | USM_200000_IGM   | IGHV1-69 | CARVYDSSGSPSYFYW           | IGHJ4 | PB  | 282 |
| 57714 | 346 | Connecting to PB | USM_200000_IGM   | IGHV1-69 | CARLYDSSGSPSYFYW           | IGHJ4 | PB  | 287 |
| 57714 | 346 | Connecting to PB | USM_200000_IGM   | IGHV1-69 | CARVYDSSGSPSYFYW           | IGHJ4 | PB  | 493 |
| 57714 | 347 | Connecting to PB | CSF-USM_999_IGM  | IGHV4-39 | CARQSYEDSYW                | IGHJ4 | CSF | 52  |
| 57714 | 347 | Connecting to PB | USM_200000_IGM   | IGHV4-39 | CARQSYEDCYW                | IGHJ4 | PB  | 1   |
| 57714 | 347 | Connecting to PB | Naive_200000_IGM | IGHV4-39 | CARQSYNDFYW                | IGHJ4 | PB  | 3   |
| 57714 | 347 | Connecting to PB | USM_200000_IGM   | IGHV4-39 | CARQSYEDSYW                | IGHJ4 | PB  | 21  |
| 57714 | 347 | Connecting to PB | USM_200000_IGM   | IGHV4-39 | CARQSYNDFYW                | IGHJ4 | PB  | 40  |
| 57714 | 348 | CSF exclusive    | CSF-USM_999_IGM  | IGHV3-11 | CARRGRADYW                 | IGHJ4 | CSF | 15  |

|       |     |                  |                  |          |                        |       |     |      |
|-------|-----|------------------|------------------|----------|------------------------|-------|-----|------|
| 57714 | 348 | CSF exclusive    | CSF-USM_999_IGM  | IGHV3-11 | CARRGRVDYW             | IGHJ4 | CSF | 56   |
| 57714 | 349 | CSF exclusive    | CSF-USM_999_IGM  | IGHV3-7  | CARRRGSYHLDYW          | IGHJ4 | CSF | 41   |
| 57714 | 350 | CSF exclusive    | CSF-USM_999_IGM  | IGHV3-74 | CARSAPFDIW             | IGHJ3 | CSF | 219  |
| 57714 | 351 | CSF exclusive    | CSF-USM_999_IGM  | IGHV4-34 | CARSAGRNRGFDYW         | IGHJ4 | CSF | 112  |
| 57714 | 352 | CSF exclusive    | CSF-USM_999_IGM  | IGHV3-7  | CARSRGYNALDSW          | IGHJ5 | CSF | 36   |
| 57714 | 353 | Connecting to PB | CSF-USM_999_IGM  | IGHV2-26 | CARTPFAW               | IGHJ6 | CSF | 1083 |
| 57714 | 353 | Connecting to PB | SM_178484_IGM    | IGHV2-26 | CARTPFAW               | IGHJ6 | PB  | 1    |
| 57714 | 354 | CSF exclusive    | CSF-USM_999_IGM  | IGHV3-53 | CARVADSSSGWYHFDYW      | IGHJ4 | CSF | 11   |
| 57714 | 355 | CSF exclusive    | CSF-USM_999_IGM  | IGHV3-21 | CARVFNQLLWHGMDVW       | IGHJ6 | CSF | 7    |
| 57714 | 356 | CSF exclusive    | CSF-USM_999_IGM  | IGHV4-59 | CARVGLWELPGDERNDAIDIW  | IGHJ3 | CSF | 131  |
| 57714 | 357 | Connecting to PB | CSF-USM_999_IGM  | IGHV4-59 | CARVPAAGTGPDIW         | IGHJ4 | CSF | 54   |
| 57714 | 357 | Connecting to PB | USM_200000_IGM   | IGHV4-59 | CARVPAAGTGPDIW         | IGHJ4 | PB  | 8    |
| 57714 | 358 | CSF exclusive    | CSF-USM_999_IGM  | IGHV4-39 | CARVSYGYDVFVYW         | IGHJ4 | CSF | 8    |
| 57714 | 359 | CSF exclusive    | CSF-USM_999_IGM  | IGHV1-8  | CARVWGFAPDFW           | IGHJ5 | CSF | 92   |
| 57714 | 360 | CSF exclusive    | CSF-USM_999_IGM  | IGHV3-30 | CASDRGHCTNDVCYGMVW     | IGHJ6 | CSF | 22   |
| 57714 | 360 | CSF exclusive    | CSF-USM_999_IGM  | IGHV3-30 | CASDRGHCTNGVCYGMVW     | IGHJ6 | CSF | 22   |
| 57714 | 361 | CSF exclusive    | CSF-USM_999_IGM  | IGHV3-7  | CASDWNDVDQNAFDIW       | IGHJ3 | CSF | 11   |
| 57714 | 362 | CSF exclusive    | CSF-USM_999_IGM  | IGHV3-74 | CASEWELPDHVDLW         | IGHJ4 | CSF | 38   |
| 57714 | 363 | CSF exclusive    | CSF-USM_999_IGM  | IGHV3-48 | RASKLIAEAHGGFW         | IGHJ4 | CSF | 12   |
| 57714 | 363 | CSF exclusive    | CSF-USM_999_IGM  | IGHV3-48 | CASKLIAEAHGGYW         | IGHJ4 | CSF | 85   |
| 57714 | 364 | CSF exclusive    | CSF-USM_999_IGM  | IGHV3-53 | CASPGTYDSSGTRRLDIW     | IGHJ3 | CSF | 23   |
| 57714 | 365 | CSF exclusive    | CSF-USM_999_IGM  | IGHV1-2  | CASSGTRIEAGTWDYFDYW    | IGHJ4 | CSF | 2397 |
| 57714 | 366 | Connecting to PB | CSF-USM_999_IGM  | IGHV3-48 | CASSGWSSGYSYFDDW       | IGHJ4 | CSF | 66   |
| 57714 | 366 | Connecting to PB | USM_200000_IGM   | IGHV3-48 | CASSGWSSGYSYFDDW       | IGHJ4 | PB  | 14   |
| 57714 | 367 | Connecting to PB | CSF-USM_999_IGM  | IGHV3-11 | CASVAYSSVDRW           | IGHJ5 | CSF | 1    |
| 57714 | 367 | Connecting to PB | SM_178484_IGG    | IGHV3-11 | CASVAYSSVDPW           | IGHJ5 | PB  | 1    |
| 57714 | 367 | Connecting to PB | SM_178484_IGG    | IGHV3-11 | CASVAYSSVDRW           | IGHJ5 | PB  | 1    |
| 57714 | 367 | Connecting to PB | PC_16850_IGM     | IGHV3-11 | CASVAYSSVDRW           | IGHJ5 | PB  | 68   |
| 57714 | 367 | Connecting to PB | SM_178484_IGM    | IGHV3-11 | CASVAYSSVDRW           | IGHJ5 | PB  | 341  |
| 57714 | 368 | CSF exclusive    | CSF-USM_999_IGM  | IGHV4-28 | CATSTAAQCLIDSW         | IGHJ4 | CSF | 27   |
| 57714 | 369 | CSF exclusive    | CSF-USM_999_IGM  | IGHV3-30 | CAVLNYDFWSGSPSSGLDYW   | IGHJ4 | CSF | 65   |
| 57714 | 370 | CSF exclusive    | CSF-USM_999_IGM  | IGHV5-51 | CGRLGSSWSYPEYW         | IGHJ4 | CSF | 11   |
| 57714 | 371 | CSF exclusive    | CSF-USM_999_IGM  | IGHV2-5  | CGYTLTAVPAAYGYW        | IGHJ4 | CSF | 197  |
| 57714 | 372 | CSF exclusive    | CSF-USM_999_IGM  | IGHV3-53 | CSGGPNAYFDCW           | IGHJ4 | CSF | 5    |
| 57714 | 373 | CSF exclusive    | CSF-USM_999_IGM  | IGHV2-5  | CSHGTDSDHYW            | IGHJ4 | CSF | 3    |
| 57714 | 374 | Connecting to PB | CSF-USM_999_IGM  | IGHV3-15 | CSKEVGGTGSYYYGMDVW     | IGHJ6 | CSF | 47   |
| 57714 | 374 | Connecting to PB | Naive_200000_IGM | IGHV3-15 | CSKEVGATGSYYYGMDVW     | IGHJ6 | PB  | 1    |
| 57714 | 374 | Connecting to PB | USM_200000_IGM   | IGHV3-15 | CAREVGATGSYYYGMDVW     | IGHJ6 | PB  | 8    |
| 57714 | 374 | Connecting to PB | USM_200000_IGM   | IGHV3-15 | CSKEVGATGSYYYGMDVW     | IGHJ6 | PB  | 8    |
| 57714 | 374 | Connecting to PB | PC_16850_IGM     | IGHV3-15 | CSREVGATGSYYYGMDVW     | IGHJ6 | PB  | 22   |
| 57714 | 374 | Connecting to PB | PC_16850_IGM     | IGHV3-15 | CTKEVGATNSYYYGMDVW     | IGHJ6 | PB  | 23   |
| 57714 | 375 | Connecting to PB | CSF-USM_999_IGM  | IGHV3-15 | CTIGDGWNPBW            | IGHJ4 | CSF | 7    |
| 57714 | 375 | Connecting to PB | SM_178484_IGM    | IGHV3-15 | CTTGDGWNPDW            | IGHJ4 | PB  | 2    |
| 57714 | 375 | Connecting to PB | USM_200000_IGM   | IGHV3-15 | CTIGDGWNPBW            | IGHJ4 | PB  | 12   |
| 57714 | 376 | CSF exclusive    | CSF-USM_999_IGM  | IGHV3-30 | CTKDYRTEGSSSQSW        | IGHJ5 | CSF | 19   |
| 57714 | 377 | CSF exclusive    | CSF-USM_999_IGM  | IGHV3-9  | CTKGSDDCTNGDCLASSW     | IGHJ5 | CSF | 5    |
| 57714 | 378 | Connecting to PB | CSF-USM_999_IGM  | IGHV6-1  | CTRGATWNHDCW           | IGHJ4 | CSF | 11   |
| 57714 | 378 | Connecting to PB | USM_200000_IGM   | IGHV6-1  | CTRGATWNFDYW           | IGHJ4 | PB  | 7    |
| 57714 | 379 | CSF exclusive    | CSF-USM_999_IGM  | IGHV1-8  | CTRGAYNSNGYHDFW        | IGHJ4 | CSF | 84   |
| 57714 | 380 | CSF exclusive    | CSF-USM_999_IGM  | IGHV3-53 | CTRGPTNPFDW            | IGHJ4 | CSF | 80   |
| 57714 | 381 | CSF exclusive    | CSF-USM_999_IGM  | IGHV3-7  | CTRMSLGPVDCW           | IGHJ4 | CSF | 23   |
| 57714 | 382 | Connecting to PB | CSF-USM_999_IGM  | IGHV3-15 | CTTEFCSGGSCYSYDW       | IGHJ4 | CSF | 22   |
| 57714 | 382 | Connecting to PB | USM_200000_IGM   | IGHV3-15 | CTTEFCSGGSCYSYDW       | IGHJ4 | PB  | 10   |
| 57714 | 383 | CSF exclusive    | CSF-USM_999_IGM  | IGHV3-15 | CTTGRRLPDYRDNDYW       | IGHJ4 | CSF | 1    |
| 57714 | 383 | CSF exclusive    | CSF-USM_999_IGM  | IGHV3-15 | CTTERRGLPDYRDNDYW      | IGHJ4 | CSF | 11   |
| 57714 | 384 | CSF exclusive    | CSF-USM_999_IGM  | IGHV3-15 | CTTESRQRGYSYGNNDYW     | IGHJ4 | CSF | 33   |
| 57714 | 385 | CSF exclusive    | CSF-USM_999_IGM  | IGHV3-15 | CTYHTPDSSVIFDYW        | IGHJ4 | CSF | 20   |
| 57714 | 386 | Connecting to PB | CSF-USM_999_IGM  | IGHV3-9  | CVKDQYSSLGYYYGMDVW     | IGHJ6 | CSF | 3    |
| 57714 | 386 | Connecting to PB | SM_178484_IGG    | IGHV3-9  | CVKDQYSSLGYYYGMDVW     | IGHJ6 | PB  | 5    |
| 57714 | 387 | CSF exclusive    | CSF-USM_999_IGM  | IGHV3-23 | CVKEGLDCSAGSCYTWNWDFPW | IGHJ5 | CSF | 14   |
| 57714 | 388 | CSF exclusive    | CSF-USM_999_IGM  | IGHV3-30 | CVKKEFDYW              | IGHJ4 | CSF | 98   |
| 57714 | 389 | CSF exclusive    | CSF-USM_999_IGM  | IGHV3-11 | CVRDNRENMYMESW         | IGHJ4 | CSF | 112  |
| 57714 | 390 | CSF exclusive    | CSF-USM_999_IGM  | IGHV3-7  | CVRDPAYSAPDIW          | IGHJ4 | CSF | 23   |
| 57714 | 391 | Connecting to PB | CSF-USM_999_IGM  | IGHV3-48 | CVRDPHALDYW            | IGHJ4 | CSF | 35   |
| 57714 | 391 | Connecting to PB | SM_178484_IGG    | IGHV3-48 | CTRDPHALDYW            | IGHJ4 | PB  | 2    |
| 57714 | 391 | Connecting to PB | USM_200000_IGM   | IGHV3-48 | CTRDPHALDFW            | IGHJ4 | PB  | 3    |
| 57714 | 391 | Connecting to PB | USM_200000_IGM   | IGHV3-48 | CTRDPHALDYW            | IGHJ4 | PB  | 4    |
| 57714 | 392 | CSF exclusive    | CSF-USM_999_IGM  | IGHV3-74 | CVRGGDVSARWYFDYW       | IGHJ4 | CSF | 23   |
| 57714 | 393 | CSF exclusive    | CSF-USM_999_IGM  | IGHV3-7  | CVRGGYGGNWSRNW         | IGHJ4 | CSF | 5    |
| 57714 | 394 | Connecting to PB | CSF-USM_999_IGM  | IGHV4-39 | CVRGYWGGICHCPGEW       | IGHJ4 | CSF | 170  |
| 57714 | 394 | Connecting to PB | SM_178484_IGM    | IGHV4-39 | CVRGYWGGICHCPGEW       | IGHJ4 | PB  | 61   |
| 57714 | 395 | CSF exclusive    | CSF-USM_999_IGM  | IGHV3-11 | CVRLPHPIANYYSGLDWW     | IGHJ6 | CSF | 34   |
| 57714 | 396 | CSF exclusive    | CSF-USM_999_IGM  | IGHV4-39 | CVRLRREGGWYYW          | IGHJ4 | CSF | 1    |
| 57714 | 397 | Connecting to PB | CSF-USM_999_IGM  | IGHV4-34 | CVRVTRDDVDFDLW         | IGHJ2 | CSF | 172  |
| 57714 | 397 | Connecting to PB | USM_200000_IGM   | IGHV4-34 | CVRVSPDEVDFDLW         | IGHJ2 | PB  | 1    |
| 57714 | 397 | Connecting to PB | PC_16850_IGG     | IGHV4-34 | CVRVTPDDVDFDLW         | IGHJ2 | PB  | 2    |
| 57714 | 397 | Connecting to PB | PC_16850_IGM     | IGHV4-34 | CVGVTTPDDADFDLW        | IGHJ2 | PB  | 3    |
| 57714 | 397 | Connecting to PB | SM_178484_IGG    | IGHV4-34 | CVRVTPNDVDFDLW         | IGHJ2 | PB  | 12   |
| 57714 | 397 | Connecting to PB | USM_200000_IGM   | IGHV4-34 | CVKVTTPDDVDFDLW        | IGHJ2 | PB  | 51   |
| 57714 | 397 | Connecting to PB | PC_16850_IGM     | IGHV4-34 | CVRVTPDDVDFDVW         | IGHJ2 | PB  | 99   |
| 57714 | 397 | Connecting to PB | PC_16850_IGM     | IGHV4-34 | CVRVSPDEVDFDLW         | IGHJ2 | PB  | 102  |
| 57714 | 397 | Connecting to PB | PC_16850_IGM     | IGHV4-34 | CVKVTTPDDVDFDLW        | IGHJ2 | PB  | 143  |
| 57714 | 397 | Connecting to PB | USM_200000_IGM   | IGHV4-34 | CVRVTPDDVDFDLW         | IGHJ2 | PB  | 322  |
| 57714 | 397 | Connecting to PB | SM_178484_IGM    | IGHV4-34 | CVRVTPDDVDFDLW         | IGHJ2 | PB  | 726  |
| 57714 | 397 | Connecting to PB | PC_16850_IGM     | IGHV4-34 | CVRVTPDDVDFDLW         | IGHJ2 | PB  | 919  |

|       |     |                  |                     |          |                            |       |     |       |
|-------|-----|------------------|---------------------|----------|----------------------------|-------|-----|-------|
| 57714 | 398 | Connecting to PB | CSF-USM_999_IgM     | IGHV1-3  | CWHSYNSRSRSGMDVW           | IGHJ6 | CSF | 233   |
| 57714 | 398 | Connecting to PB | USM_200000_IgM      | IGHV1-3  | CWHSYNSRSRSGMDVW           | IGHJ6 | PB  | 11    |
| 57714 | 399 | CSF exclusive    | CSF-USM_999_IgM     | IGHV2-5  | YGHRRQSSYDYHGVDVW          | IGHJ6 | CSF | 17    |
| 64215 | 1   | CSF exclusive    | CSF_SM_31_BCR_IgG   | IGHV4-31 | CARARLDKAYSGDSYYGLDVG      | IGHJ6 | CSF | 253   |
| 64215 | 2   | CSF exclusive    | CSF_SM_31_BCR_IgG   | IGHV3-53 | CARDPGYTYGQYYYYYGMVDVW     | IGHJ6 | CSF | 56    |
| 64215 | 3   | Connecting to PB | CSF_SM_31_BCR_IgG   | IGHV3-53 | CARDPGYTYGQYYYYYGMVDVW     | IGHJ6 | CSF | 7008  |
| 64215 | 3   | Connecting to PB | PB_DN_29829_BCR_IgG | IGHV3-53 | CARDPGYTYGQYYYYYGMVDVW     | IGHJ6 | PB  | 1     |
| 64215 | 4   | CSF exclusive    | CSF_SM_31_BCR_IgG   | IGHV3-53 | CARDPGYTYGQYYYYYGMVDVW     | IGHJ6 | CSF | 63    |
| 64215 | 5   | CSF exclusive    | CSF_SM_31_BCR_IgG   | IGHV3-30 | CARGASHCGGDCFWAPPDSW       | IGHJ4 | CSF | 3973  |
| 64215 | 6   | CSF exclusive    | CSF_SM_31_BCR_IgG   | IGHV4-39 | CARLEENAYYDSSGGLLEVFDSW    | IGHJ4 | CSF | 23    |
| 64215 | 7   | CSF exclusive    | CSF_SM_31_BCR_IgG   | IGHV4-31 | CARYSDYDLNLDYW             | IGHJ4 | CSF | 2014  |
| 64215 | 8   | CSF exclusive    | CSF_SM_31_BCR_IgG   | IGHV3-7  | CASAGCFGELFSSW             | IGHJ5 | CSF | 639   |
| 64215 | 9   | CSF exclusive    | CSF_SM_31_BCR_IgG   | IGHV3-7  | CASAGYFGELEFSSW            | IGHJ4 | CSF | 11459 |
| 64215 | 10  | Connecting to PB | CSF_SM_31_BCR_IgG   | IGHV5-51 | CVLAHLAHDVDFDVW            | IGHJ3 | CSF | 1     |
| 64215 | 10  | Connecting to PB | PB_PC_2347_BCR_IgG  | IGHV5-51 | CVLAHLAHDVDFDVW            | IGHJ3 | PB  | 1309  |
| 64215 | 11  | CSF exclusive    | CSF_SM_31_BCR_IgM   | IGHV4-39 | CARHSSPGYYDSSGYPRNYFDSW    | IGHJ4 | CSF | 11173 |
| 64215 | 12  | CSF exclusive    | CSF_SM_31_BCR_IgM   | IGHV4-39 | CARSKDTYYDTSGYYTFDYW       | IGHJ4 | CSF | 21    |
| 64215 | 12  | CSF exclusive    | CSF_USM_20_BCR_IgM  | IGHV4-39 | CARSKDTYYDTSGYYTFDYW       | IGHJ4 | CSF | 21597 |
| 64215 | 13  | CSF exclusive    | CSF_SM_31_BCR_IgM   | IGHV4-34 | CARVSYRDTARSGFDYW          | IGHJ4 | CSF | 1     |
| 64215 | 14  | CSF exclusive    | CSF_SM_31_BCR_IgM   | IGHV3-53 | CGRGERGSDYGDYWYFDFLW       | IGHJ2 | CSF | 850   |
| 64215 | 15  | CSF exclusive    | CSF_USM_20_BCR_IgM  | IGHV4-28 | CARGSGYYGSGSSHNNNDGLDNW    | IGHJ4 | CSF | 2356  |
| 64215 | 16  | CSF exclusive    | CSF_USM_20_BCR_IgM  | IGHV3-11 | CARTGSGGYHYW               | IGHJ4 | CSF | 1714  |
| 64215 | 17  | CSF exclusive    | CSF_USM_20_BCR_IgM  | IGHV3-53 | CATDGGSGTYDQIFAFYYYYGMVDVW | IGHJ6 | CSF | 1338  |
| 64215 | 18  | CSF exclusive    | CSF_USM_20_BCR_IgM  | IGHV3-15 | CTTDFVGDYGGYW              | IGHJ4 | CSF | 1     |
| 64215 | 19  | CSF exclusive    | CSF_USM_20_BCR_IgM  | IGHV1-2  | CVKETQAIYYDNTTEFYFDYW      | IGHJ4 | CSF | 20    |
